# Supplementary material for: Ethanol-assisted mechanochemical asymmetric cross-dehydrogenative coupling reaction with recoverable chiral amine/NaCl for accessing chiral α-alkyl α-glycine derivatives
Source: Royal Society of Chemistry journal article supplement (doi:10.1039/d4gc00947a), 2024-01-01
Supplement: d4gc00947a1.pdf [file d4gc00947a1.pdf]

Supporting information

**Ethanol-assisted mechanochemical asymmetric  
cross-dehydrogenative coupling reaction with recoverable  
chiral amine/NaCl for accessing chiral  $\alpha$ -alkyl  $\alpha$ -glycine  
derivatives**

Jingbo Yu, <sup>a,\*</sup> Hong Chen, <sup>a</sup> Ziwen Zhang, <sup>a</sup> Yuxin Fang, <sup>a</sup> Tao Ying <sup>a</sup> and Weike  
Su <sup>a</sup>

<sup>a</sup> *National Engineering Research Center for Process Development of Active  
Pharmaceutical Ingredients, Collaborative Innovation Center of Yangtze River  
Delta Region Green Pharmaceuticals, Zhejiang University of Technology,  
Hangzhou, 310014, P.R. China. E-mail: [yjb@zjut.edu.cn](mailto:yjb@zjut.edu.cn)*

## Table of Contents

|                                                                     |      |
|---------------------------------------------------------------------|------|
| 1. General information .....                                        | S3   |
| 2. Reaction optimization & typical procedures .....                 | S3   |
| 2.1 Optimization of the reaction conditions .....                   | S3   |
| 2.2 Typical procedures for LAG induced asymmetric CDC reaction..... | S6   |
| 3. Mechanism study.....                                             | S7   |
| 3.1 Control experiments.....                                        | S7   |
| 3.2 Radical trapping experiments.....                               | S7   |
| 3.3 Linear effect experiments .....                                 | S8   |
| 3.4 Comparative experiments.....                                    | S8   |
| 3.5 Gram-scale reactions.....                                       | S9   |
| 3.6 Synthetic applications .....                                    | S9   |
| 3.7 Recycling of grinding auxiliary (NaCl) and <b>C8</b> .....      | S10  |
| 3.8. Green chemistry metrics evaluation .....                       | S11  |
| 3.9 Crystal data for <b>3ha</b> .....                               | S17  |
| 4. Characterization data.....                                       | S23  |
| 5. NMR spectra .....                                                | S52  |
| 6. References.....                                                  | S102 |

## 1. General information

All of the ball milling reactions were conducted in a Mixer mill (MM 400 RetschGmbH, Hann, Germany) with 25 mL stainless-steel vessels (equipped with gas inlet and outlet valve) with stainless-steel balls, if not mentioned otherwise. Reactions were monitored by Thin Layer Chromatography (TLC) using UV light (254 nm) for detection.  $^1\text{H}$ ,  $^{13}\text{C}$  and  $^{19}\text{F}$  NMR spectra were recorded on Bruker 400, 500 or 600 MHz spectrometer in  $\text{CDCl}_3$  with tetramethylsilane (TMS) as internal standard. Chemical shifts are reported in parts per million (ppm). The following abbreviations were used to explain multiplicities: s = singlet, brs = broad singlet, d = doublet, t = triplet, q = quadruplet, m = multiplet and the coupling constants ( $J$ ) were reported in Hertz unit (Hz). Melting points were measured using an SRS OptiMelt MPA100 apparatus and were uncorrected. High Resolution Mass Spectrometry (HRMS) and Electrospray Ionization-Mass Spectrometry (ESI-MS) were recorded on an Agilent 6210 LC/TOFMS or Agilent 6550 QTOFMS. High Performance Liquid Chromatography (HPLC) were performed on SHIMADZU LC-20AT apparatus, using Daicel Chiralpak AD-H chiral column, eluted with a mixture of hexane and isopropyl alcohol. Optical Rotations were measured with Rudolph Autopol V polarimeter. X-ray crystallographic experiments were performed by the Crystallography Service of the Department of Chemistry, Zhejiang University. The synthesis of *N*-arylglycine esters/amide substrates was meticulously carried out under solvent-free ball-milling conditions, in accordance with our recent publication<sup>1</sup>.

## 2. Reaction optimization & typical procedures

### 2.1 Optimization of the reaction conditions

Table S1. Screening of ligands<sup>a</sup>

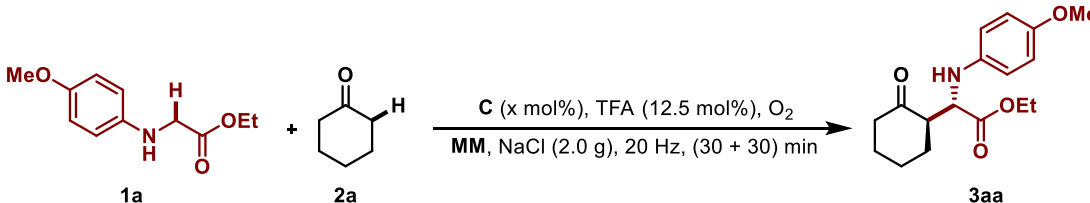

Reaction scheme showing the synthesis of 3aa from 1a and 2a. 1a is ethyl 2-(4-methoxyphenyl)glycidate, and 2a is cyclohexanone. The reaction uses catalyst C (x mol%), TFA (12.5 mol%), O<sub>2</sub>, MM, NaCl (2.0 g), 20 Hz, (30 + 30) min to produce 3aa, ethyl 2-(4-methoxyphenyl)cyclohexanecarboxylate.



Chemical structures of ligands C1 through C9:

- C1: N,N-diisopropylcyclohexylamine
- C2: N,N-diisopropyl-1,2-diphenylethane-1,2-diamine
- C3: A complex ligand with a quinoline ring, a methoxy group, and a bicyclic amine moiety
- C4: N-(2,4,6-trifluorophenyl)ethane-1,2-diamine
- C5: 1-phenylethylamine
- C6: 1-tert-butylethylamine
- C7: 1-phenylethylamine
- C8: 1-aminopropanoic acid
- C9: N-Boc-1-aminopropanoic acid

| entry | catalyst (mol%) | yield (%) <sup>b</sup> | ee (%) <sup>b</sup> | dr <sup>b</sup> |
|-------|-----------------|------------------------|---------------------|-----------------|
| 1     | C1 (20)         | 39                     | <5                  | 96: 4           |
| 2     | C2 (20)         | 35                     | <5                  | 84: 16          |
| 3     | C3 (20)         | 31                     | <5                  | 50: 50          |

|                 |                |    |    |        |
|-----------------|----------------|----|----|--------|
| 4               | <b>C4</b> (20) | 39 | 43 | 82: 18 |
| 5               | <b>C5</b> (20) | 35 | 16 | 60: 40 |
| 6               | <b>C6</b> (20) | 30 | 13 | 50: 50 |
| 7               | <b>C7</b> (20) | 33 | 10 | 55: 45 |
| 8               | <b>C8</b> (20) | 37 | 58 | 88: 12 |
| 9               | <b>C9</b> (20) | 42 | <5 | 50: 50 |
| 10              | <b>C8</b> (15) | 47 | 55 | 85: 15 |
| 11              | <b>C8</b> (10) | 46 | 58 | 87: 13 |
| 12              | <b>C8</b> (5)  | 43 | 52 | 75: 25 |
| 13 <sup>c</sup> | <b>C8</b> (10) | 51 | 59 | 88: 12 |
| 14 <sup>d</sup> | <b>C8</b> (10) | 42 | 55 | 85: 15 |
| 15 <sup>e</sup> | <b>C8</b> (10) | 35 | 52 | 81: 19 |

<sup>a</sup> Reaction conditions: **1a** (0.2 mmol), TFA (12.5 mol%), NaCl (2.0 g) were pre-milled at 20 Hz for 30 min under oxygen conditions, using two stainless-steel balls ( $d_{MB} = 1.2$  cm) in a 25 mL stainless vial, then **2a** (5 equiv.), **C** (x mol%) were added and milled for another 30 min. <sup>b</sup> Yields were those of the isolated products, ee values were determined by HPLC, *dr* values were determined by <sup>1</sup>H NMR. <sup>c</sup> **2a** (4 equiv.) was used. <sup>d</sup> **2a** (3.5 equiv.) was used. <sup>e</sup> **2a** (3 equiv.) was used.

**Table S2.** Screening of LAGs<sup>a</sup>

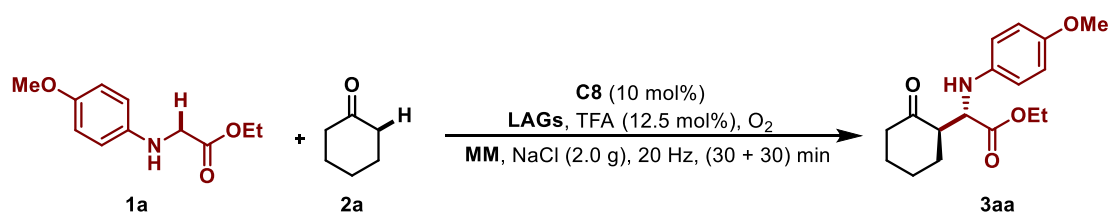

| entry | LAGs ( $\eta$ )        | yield (%) <sup>b</sup> | ee (%) <sup>b</sup> | <i>dr</i> <sup>b</sup> |
|-------|------------------------|------------------------|---------------------|------------------------|
| 1     | TFA (1.5)              | 21                     | <5                  | 20: 80                 |
| 2     | DMAE (1.5)             | 56                     | 79                  | 77: 23                 |
| 3     | MeOH (1.5)             | 53                     | 73                  | 80: 20                 |
| 4     | EtOH (1.5)             | 62                     | 85                  | 98: 2                  |
| 5     | <i>i</i> -PrOH (1.5)   | 58                     | 83                  | 98: 2                  |
| 6     | <i>t</i> -BuOH (1.5)   | 57                     | 82                  | 95: 5                  |
| 7     | BnOH (1.5)             | 45                     | 74                  | 68: 32                 |
| 8     | HFIP (1.5)             | 39                     | 75                  | 78: 22                 |
| 9     | H <sub>2</sub> O (1.5) | 42                     | 9                   | 56: 14                 |
| 10    | MeCN (1.5)             | 52                     | 57                  | 83: 17                 |
| 11    | EtOAc (1.5)            | 40                     | <5                  | 50: 50                 |
| 12    | DMF (1.5)              | 25                     | 54                  | 50: 50                 |

|    |                         |    |    |        |
|----|-------------------------|----|----|--------|
| 13 | DMSO (1.5)              | 29 | 53 | 85: 15 |
| 14 | NMP (1.5)               | 20 | 41 | 70: 30 |
| 15 | Acetone (1.5)           | 49 | 37 | 60: 40 |
| 16 | Et <sub>2</sub> O (1.5) | 32 | 5  | 55: 45 |
| 17 | DBE (1.5)               | 22 | 14 | 50: 50 |
| 18 | THF (1.5)               | 27 | 18 | 64: 36 |
| 19 | 1,4-Dioxane (1.5)       | 23 | 13 | 50: 50 |
| 20 | DCM (1.5)               | 38 | <5 | 55: 45 |
| 21 | Cyclohexane (1.5)       | 35 | 5  | 50: 50 |
| 22 | <i>n</i> -Hexane (1.5)  | 37 | <5 | 43: 57 |
| 23 | Toluene (1.5)           | 24 | 5  | 50: 50 |
| 24 | EtOH (1.3)              | 71 | 89 | 98: 2  |
| 25 | EtOH (1.1)              | 63 | 80 | 95: 5  |
| 26 | EtOH (1.7)              | 61 | 87 | 96: 4  |

<sup>a</sup> Reaction conditions: **1a** (0.2 mmol), TFA (12.5 mol%), NaCl (2.0 g) were pre-milled at 20 Hz for 30 min under oxygen conditions, using two stainless-steel balls ( $d_{MB} = 1.2$  cm) in a 25 mL stainless vial, then **2a** (4 equiv.), **C8** (10 mol%) and LAGs ( $\eta$ ) [ $\eta = V$  (liquid;  $\mu\text{L}$ )/ $m$  (reagents; mg)] were added and milled for another 30 min. <sup>b</sup> Yields were those of the isolated products, *ee* values were determined by HPLC, *dr* values were determined by <sup>1</sup>H NMR. TFA = Trifluoroacetic acid; DMAE = Dimethylaminoethanol; HFIP = Hexafluoroisopropanol; DMF = *N,N*-Dimethylformamide; DMSO = Dimethyl sulfoxide; NMP = *N*-Methylpyrrolidone; DBE=Dibutyl ether; THF = Tetrahydrofuran; DCM = Dichloromethane.

**Table S3.** Screening of the additives and auxiliaries<sup>a</sup>

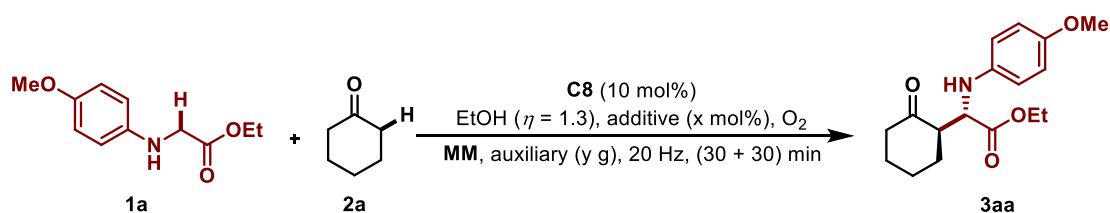

| entry | additive (mol%)            | auxiliary (g)                                | yield (%) <sup>b</sup> | <i>ee</i> (%) <sup>b</sup> | <i>dr</i> <sup>b</sup> |
|-------|----------------------------|----------------------------------------------|------------------------|----------------------------|------------------------|
| 1     | TFA (12.5)                 | NaCl (2.0)                                   | 71                     | 89                         | 98: 2                  |
| 2     | MeSO <sub>3</sub> H (12.5) | NaCl (2.0)                                   | n.r.                   | –                          | –                      |
| 3     | TfOH (12.5)                | NaCl (2.0)                                   | 48                     | 80                         | 94: 6                  |
| 4     | AcOH (12.5)                | NaCl (2.0)                                   | 66                     | 90                         | 97: 3                  |
| 5     | AcOH (9.5)                 | NaCl (2.0)                                   | 69                     | 89                         | 97: 3                  |
| 6     | AcOH (6.5)                 | NaCl (2.0)                                   | 75                     | 91                         | 98: 2                  |
| 7     | AcOH (6.5)                 | Silica gel (2.0)                             | 53                     | 51                         | 65: 35                 |
| 8     | AcOH (6.5)                 | Neutral Al <sub>2</sub> O <sub>3</sub> (2.0) | n.r.                   | –                          | –                      |

|    |            |                                       |    |    |        |
|----|------------|---------------------------------------|----|----|--------|
| 9  | AcOH (6.5) | Na <sub>2</sub> SO <sub>4</sub> (2.0) | 72 | 85 | 90: 10 |
| 10 | AcOH (6.5) | NaCl (1.0)                            | 65 | 90 | 97: 3  |
| 11 | AcOH (6.5) | NaCl (3.0)                            | 66 | 89 | 97: 3  |

<sup>a</sup> Reaction conditions: **1a** (0.2 mmol), additive, and grinding auxiliary were pre-milled at 20 Hz for 30 min under oxygen conditions, using two stainless-steel balls ( $d_{MB} = 1.2$  cm) in a 25 mL stainless vial, then **2a** (4 equiv.), **C8** (10 mol%) and EtOH ( $\eta = 1.3$ ) were added and milled for another 30 min. <sup>b</sup> Yields were those of the isolated products, ee values were determined by HPLC, dr values were determined by <sup>1</sup>H NMR. n.r. = no reaction.

**Table S4.** Screening of the mechanical parameters<sup>a</sup>

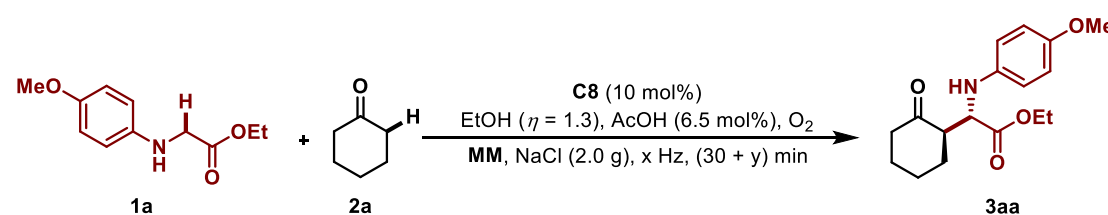

| entry | Frequency (Hz) | balls (n×mm) | time (min+min) | yield (%) <sup>b</sup> | ee (%) <sup>b</sup> | dr <sup>b</sup> |
|-------|----------------|--------------|----------------|------------------------|---------------------|-----------------|
| 1     | 25             | 2×12         | 30+30          | 82                     | 82                  | 88: 12          |
| 2     | 15             | 2×12         | 30+30          | 54                     | 78                  | 76: 24          |
| 3     | 20             | 2×12         | 30+30          | 75                     | 91                  | 98: 2           |
| 4     | 20             | 2×12         | 30+40          | 78                     | 93                  | 99: 1           |
| 5     | 20             | 2×12         | 30+50          | 80                     | 95                  | >99: 1          |
| 6     | 20             | 2×12         | 30+60          | 83                     | 89                  | 97: 3           |
| 7     | 20             | 2×14         | 30+50          | 78                     | 85                  | 97: 3           |
| 8     | 20             | 2×10         | 30+50          | 76                     | 90                  | 99: 1           |

<sup>a</sup> Reaction conditions: **1a** (0.2 mmol), AcOH (6.5 mol%), NaCl (2.0 g) were pre-milled at x Hz for 30 min under oxygen conditions, using two stainless-steel balls in a 25 mL stainless vial, then **2a** (4 equiv.), **C8** (10 mol%) and EtOH ( $\eta = 1.3$ ) were added and milled for another y min. <sup>b</sup> Yields were those of the isolated products, ee values were determined by HPLC, dr values were determined by <sup>1</sup>H NMR.

## 2.2 Typical procedures for LAG induced asymmetric CDC reaction

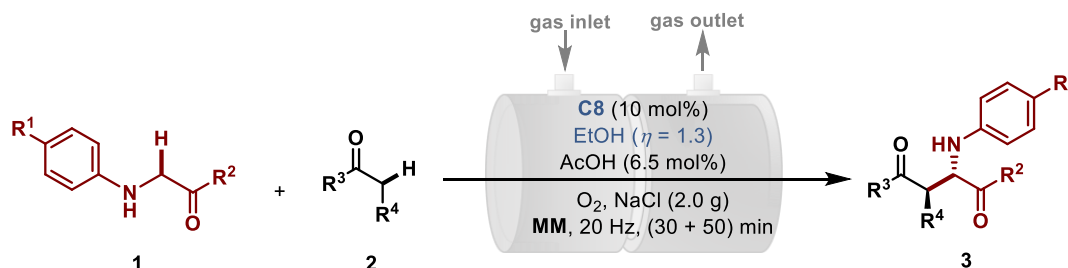

Typical procedure: a mixture of **1** (0.2 mmol), AcOH (6.5 mol%) and NaCl (2.0 g) were placed in a stainless-steel vessel (25 mL, equipped with gas inlet and outlet valve) with two stainless-steel balls ( $d_{MB} = 1.2$  cm), and oxygen was filled in through the gas inlet valve. Then, the ball milling vessel was placed in

the mixer mill and pre-milled at 20 Hz for 30 min. After that, **2** (0.8 mmol, 4.0 equiv.), **C8** (0.02 mmol, 0.1 equiv.) and EtOH ( $\eta = 1.3$ ) were added and oxygen was also filled in through the gas inlet valve. The mixtures were milled at 20 Hz for another 2×25 min, then the contents were scratched off the vessel and purified directly by column chromatography on silica gel using petroleum ether/EtOAc as eluent to give the desired products **3**.

The preparation procedure for **3ac**, **3ah**, **3aj**, **3ak** and **3am**, using the LAG method follows the typical procedure. After the ball-milling, the contents were rinsed with petroleum ether/EtOAc (10:1), the filtrate was concentrated and dried under vacuum to give the pure products.

### 3. Mechanism study

#### 3.1 Control experiments

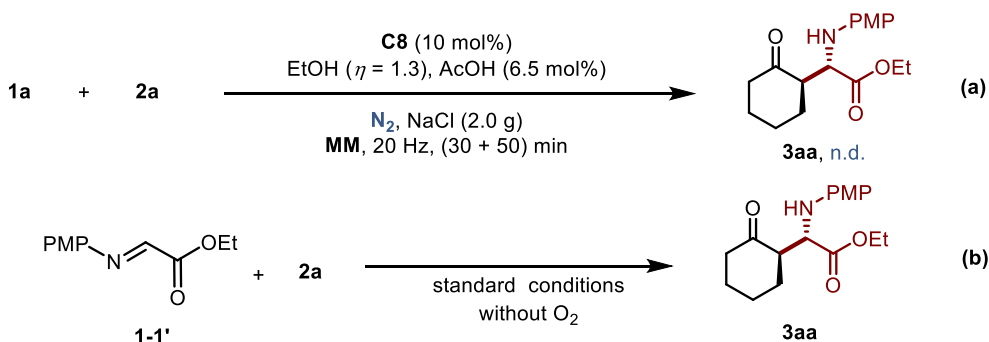

| entry | variation from "standard conditions <sup>a</sup> (without O <sub>2</sub> )" | yield (%) <sup>b</sup> | ee (%) <sup>b</sup> |
|-------|-----------------------------------------------------------------------------|------------------------|---------------------|
| 1     | --                                                                          | 85                     | 82                  |
| 2     | without EtOH                                                                | 78                     | 70                  |
| 3     | without AcOH                                                                | 86                     | 90                  |
| 4     | without AcOH and EtOH                                                       | 82                     | 91                  |

Reaction conditions: (a) **1a** (0.2 mmol), AcOH (6.5 mol%) and NaCl (2.0 g) were placed in a stainless-steel vessel (25 mL, equipped with gas inlet and outlet valve) with two stainless-steel balls ( $d_{MB} = 1.2$  cm) under nitrogen atmospheres in a mixer mill and pre-milled at 20 Hz for 30 min. Then, **2a** (4.0 equiv.), **C8** (10 mol%) and EtOH ( $\eta = 1.3$ ) were added under nitrogen atmospheres and the mixtures were milled for another 2×25 min under nitrogen atmospheres. (b) **1-1'** (0.2 mmol), AcOH (6.5 mol%) and NaCl (2.0 g) was placed in a stainless-steel vessel (25 mL) with two stainless-steel balls ( $d_{MB} = 1.2$  cm). Then, the ball milling vessel was placed in the mixer mill and pre-milled at 20 Hz for 30 min. After that, **2a** (4.0 equiv.), **C8** (10 mol%) and EtOH ( $\eta = 1.3$ ) were added. The mixtures were milled at 20 Hz for another 2×25 min.

#### 3.2 Radical trapping experiments

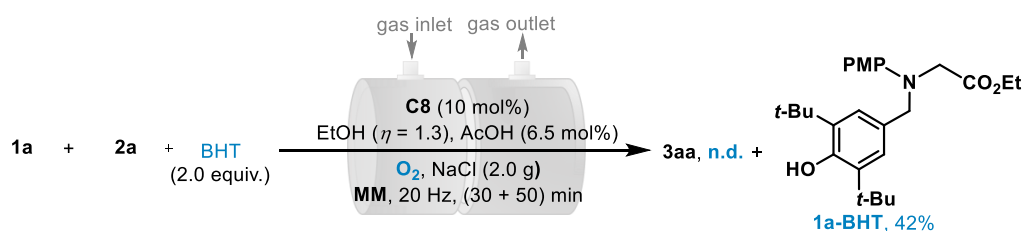

Reaction conditions: **1a** (0.2 mmol), AcOH (6.5 mol%), BHT (2.0 equiv.) and NaCl (2.0 g) were placed in a stainless-steel vessel (25 mL, equipped with gas inlet and outlet valve) with two stainless-steel balls ( $d_{MB} = 1.2$  cm), and oxygen was filled in through the gas inlet valve. Then, the ball milling vessel was placed in the mixer mill and pre-milled at 20 Hz for 30 min. After that, **2a** (4.0 equiv.), **C8** (10 mol%) and EtOH ( $\eta = 1.3$ ) were added and oxygen was also filled in through the gas inlet valve. The mixtures were milled at 20 Hz for another 2×25 min.

### 3.3 Linear effect experiments

The reactions were conducted following the typical procedure (see section 2.2).

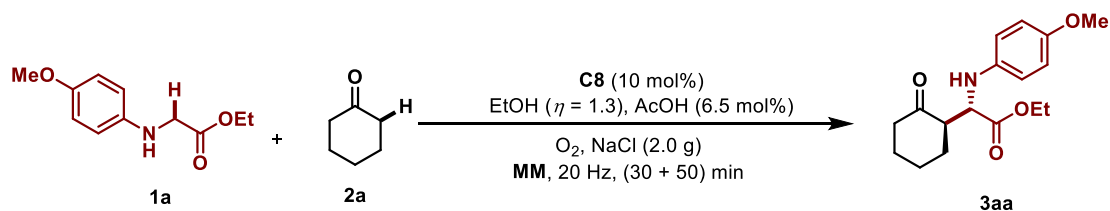

**Table S5.** Relationship between the ee values of **C8** and **3aa**.

|                     |   |   |    |    |    |    |    |    |    |    |    |
|---------------------|---|---|----|----|----|----|----|----|----|----|----|
| ee % ( <b>C8</b> )  | 0 | 5 | 15 | 25 | 30 | 40 | 50 | 60 | 75 | 85 | 99 |
| ee % ( <b>3aa</b> ) | 0 | 3 | 15 | 27 | 33 | 46 | 57 | 65 | 77 | 82 | 95 |

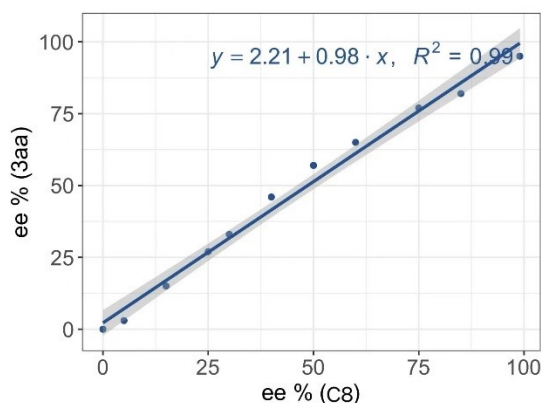

**Figure S1.** Relationship between the ee values of **C8** and **3aa**.

### 3.4 Comparative experiments

#### *Comparative experiments under solution-based conditions.*

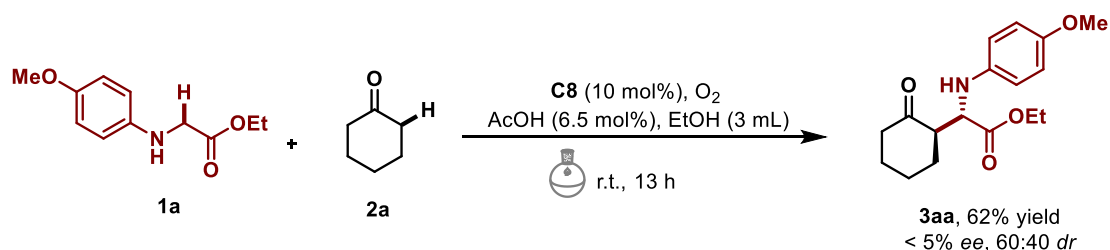

Reaction of **1a** and **2a** under solution-based conditions. Reaction conditions: **1a** (0.2 mmol) and AcOH (6.5 mol%) were placed in a flask (10 mL) with EtOH (3 mL) under oxygen atmosphere pre-stirred at rt for 6 h, then **2a** (0.8 mmol, 4.0 equiv.) and **C8** (10 mol%) were added, and the mixtures were stirring for 7 h.

#### *Comparative experiments under neat-stirring conditions.*



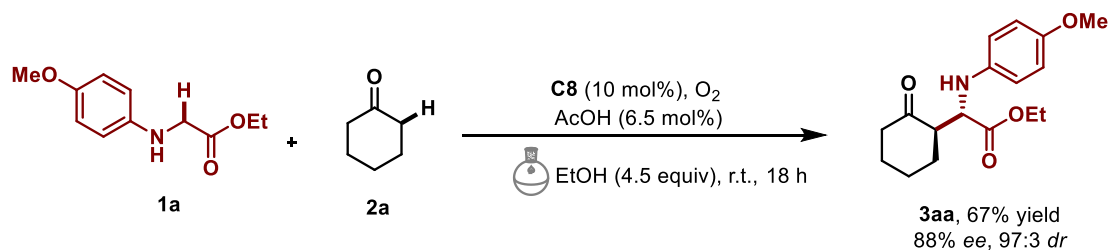

### 3.5 Gram-scale reactions

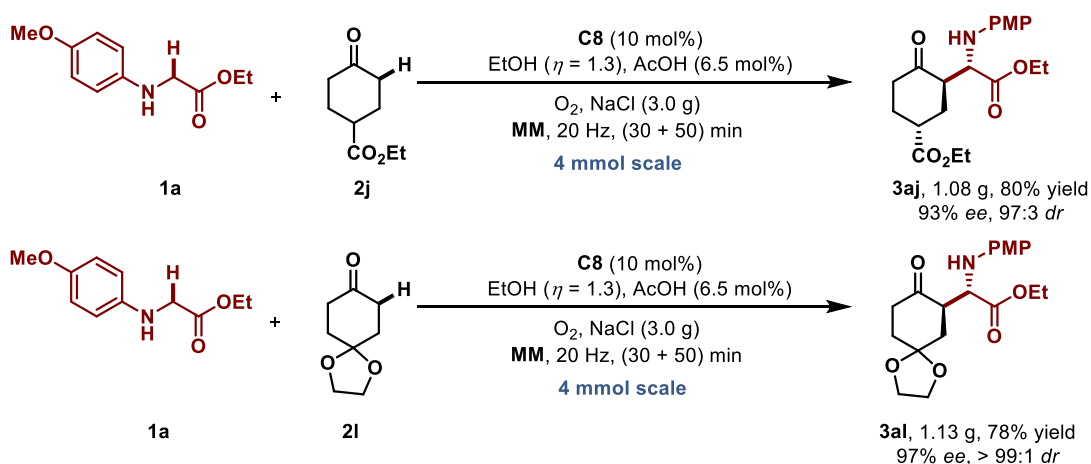

A mixture of **1a** (4 mmol), AcOH (6.5 mol%) and NaCl (3.0 g) were placed in a stainless-steel vessel (50 mL, equipped with gas inlet and outlet valve) with two stainless-steel balls ( $d_{MB} = 1.2$  cm), and oxygen was filled in through the gas inlet valve. Then, the ball milling vessel was placed in the mixer mill and pre-milled at 20 Hz for 30 min. After that, **2j** (4.0 equiv.) or **2k** (4.0 equiv.), **C8** (10 mmol%) and EtOH ( $\eta = 1.3$ ) were added and oxygen was also filled in through the gas inlet valve. The mixtures were milled at 20 Hz for another 2×25 min. After the ball-milling, the contents were rinsed with petroleum ether/EtOAc (10:1), the filtrate was concentrated and dried under vacuum to give **3aj** (1.08 g) or **3al** (1.13 g).

### 3.6 Synthetic applications

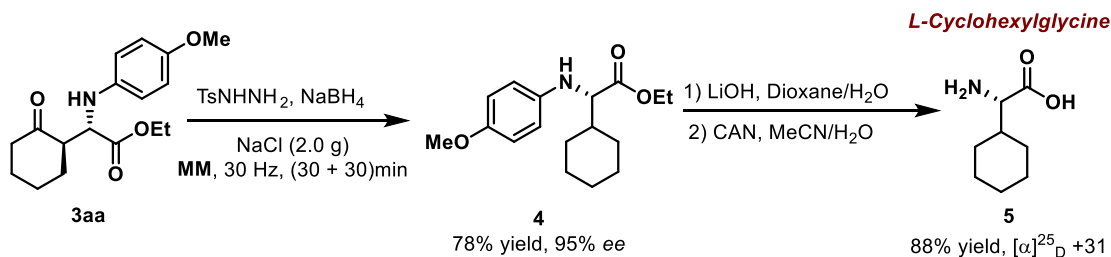

**Step1:** A mixture of **3aa** (500 mg, 1.637 mmol), tosylhydrazine (427 mg, 1.4 equiv.) and NaCl (2.0 g) were placed in a stainless-steel vessel (25 mL) with two stainless-steel balls ( $d_{MB} = 1.2$  cm). Then, the ball milling vessel was placed in the mixer mill and milled at 30 Hz for 30 min. After that, NaBH<sub>4</sub> (620 mg)

were added and the mixtures were milled at 30 Hz for 30 min, then the contents were scratched off the vessel, then brine was added and the mixture was extracted with EtOAc. The combined organic layers were dried and concentrated, and the residue was purified by flash column chromatography to afford ethyl (*R*)-*N*-(*p*-methoxyphenyl)-cyclohexylglycinate **4** in 78% yield with 95% ee.

**Step2:** To a solution of **4** (291 mg, 1.0 mmol) in dioxane/water (14 mL, 1:1) was added LiOH (280 mg) and the mixture was stirred at room temperature for 14 h. Then, the mixture was acidified with 1 N HCl and extracted with EtOAc. The combined organic layers were dried, filtered, and concentrated. Purification of the residue by flash column chromatography afforded known *N*-PMP-protected cyclohexylglycine. The solution of ceric ammonium nitrate (CAN, 1.1 g, 2 mmol, 2.5 equiv.) distilled water (8.0 mL) was added slowly to the stirred solution of *N*-PMP-protected cyclohexylglycine (200 mg, 0.81 mmol) in MeCN/H<sub>2</sub>O (3/1, 16.0 mL) at 0 °C. The reaction mixture was further stirred at 0 °C for about 1 h, till the reaction completed as monitored by TLC. The reaction was then quenched by adding the saturated Na<sub>2</sub>SO<sub>4</sub> solution and extracted with EtOAc. The combined organic layer was extracted with 0.1 M HCl. The combine aqueous layer was neutralized by NaHCO<sub>3</sub> (pH = 7) and extracted with EtOAc. The combined organic layer was washed with brine solution, dried over anhydrous Na<sub>2</sub>SO<sub>4</sub> and evaporated under reduced pressure, product **5** (138.2 mg, 88% yield) was afforded without further purification.

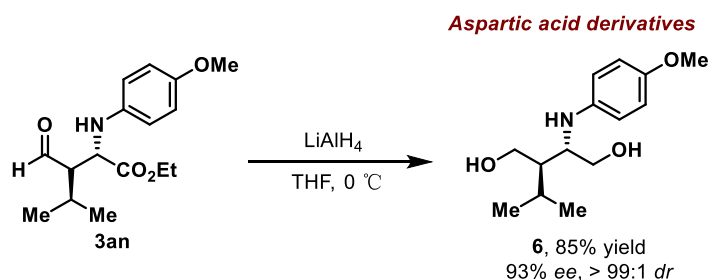

A solution of **3an** (118 mg, 0.4 mmol) in THF (20 mL) was cooled to 0 °C and LiAlH<sub>4</sub> (10 mL, 1 M solution in THF) was added. After stirring for 30 min, the ice-bath was removed and the mixture was stirred for 1.5 h at room temperature. The mixture was quenched by careful addition of aqueous NH<sub>4</sub>Cl solution, followed by 3 M HCl, and then extracted with EtOAc. The combined organic layers were dried, filtered, and concentrated. Purification of the residue by flash column chromatography afforded (2*R*,3*S*)-2-isopropyl-3-((4-methoxyphenyl)amino)butane-1,4-diol **6** (86 mg, 85% yield, 93% ee, >99:1 dr) as pale yellow oil.

### 3.7 Recycling of grinding auxiliary (NaCl) and C8

After the reaction was completed (see section 2.2), the mixtures were dissolved in EtOAc, then filtered to give the recovered NaCl as offwhite solid, which can be directly used for the next reaction after drying under reduced pressure. *No additional acetic acid or C8 was required when using the recovered NaCl for a fresh reaction, which implies the chiral catalyst can be simultaneously recovered with NaCl, and its inherent acidity was enough to promote the aerobic oxidation of glycinate.*

For the synthesis of **3aa**, NaCl along with **C8** can be recycled and reused for at least 5 times and its recovery yields (mass of recovered solid g/2.0 g) were ranging from 96% to 99%. The average consumption of NaCl for single reaction is 16 mg. (*Fresh NaCl was added to keep its mass at 2.0 g for each reaction.*)

**Table S6.** Recycling and recovery of NaCl and **C8**.

| Recovery of NaCl and <b>C8</b> (g) | ee (%) | Yield (%) | dr (n:1) |
|------------------------------------|--------|-----------|----------|
|------------------------------------|--------|-----------|----------|

|       |      |    |    |    |
|-------|------|----|----|----|
| Run 1 | 1.98 | 93 | 78 | 99 |
| Run 2 | 1.97 | 92 | 77 | 99 |
| Run 3 | 1.95 | 92 | 79 | 99 |
| Run 4 | 1.94 | 91 | 77 | 99 |
| Run 5 | 1.92 | 91 | 76 | 98 |

### 3.8. Green chemistry metrics evaluation

The green chemistry metrics including Effective Mass Yield (EMY), Atom Economy (AE), Atom Efficiency (AEF), Reaction Mass Efficiency (RME), Optimum Efficiency (OE), Process Mass Intensity (PMI), Mass Intensity (MI), Mass Productivity (MP), *E*-factor, and Solvent Intensity (SI), were calculated according to the reported method.<sup>1</sup> EcoScale was also calculated according to the reported method.<sup>2</sup>

Based on the mechanochemical LAG method, the green chemistry metrics were calculated as follows (all the calculations are made on the basis that NaCl and **C8** can be recovered for five times) :

$$\begin{aligned} E \text{ factor} &= \frac{\sum m (\text{reactants}) + \sum m (\text{reagents}) + \sum m (\text{solvent}) + \sum m (\text{additives}) - \sum m (\text{products})}{\sum m (\text{products})} \\ &= \frac{39.04 + 78.52 + 0.23 + 44.90 + 0.525 + 16 - 46.03}{46.03} = 2.89 \end{aligned}$$

$$RME = \frac{\sum m (\text{products})}{\sum m (\text{reactants})} \times 100\% = \frac{46.03}{39.04 + 78.52} \times 100\% = 39.15\%$$

$$EMY = \frac{\sum m (\text{products})}{\sum m (\text{toxic reagents})} \times 100\% = \frac{46.03}{39.04 + 78.52 + 0.23 + 44.90 + 0.525 + 16} \times 100\% = 25.68\%$$

$$AE = \frac{\sum MW (\text{products})}{\sum MW (\text{reactants})} \times 100\% = \frac{291.35}{195.22 + 98.15 \times 4} = 49.56\%$$

$$AEF = AE \times Yield\% = 49.56\% \times 79\% = 39.15\%$$

$$OE = \frac{RME}{AE} \times 100\% = \frac{39.15}{49.56} = 80.00\%$$

$$\begin{aligned} PMI &= \frac{\sum m (\text{reactants}) + \sum m (\text{reagents}) + \sum m (\text{solvents}) + \sum m (\text{additives})}{\sum m (\text{products})} \\ &= \frac{39.04 + 78.52 + 0.23 + 44.90 + 0.525 + 16}{46.03} = 3.89 \end{aligned}$$

$$\begin{aligned} MI &= \frac{\sum m (\text{reactants}) + \sum m (\text{reagents}) + \sum m (\text{solvents (except water)}) + \sum m (\text{additives})}{\sum m (\text{products})} \\ &= \frac{39.04 + 78.52 + 0.23 + 44.90 + 0.525 + 16}{46.03} = 3.89 \end{aligned}$$

$$MP = \frac{1}{MI} \times 100\% = \frac{1}{3.89} = 25.69\%$$

$$SI = \frac{\sum m(\text{solvents (except water)})}{\sum m(\text{products})} = \frac{44.90}{46.03} = 0.98$$

#### LAG method

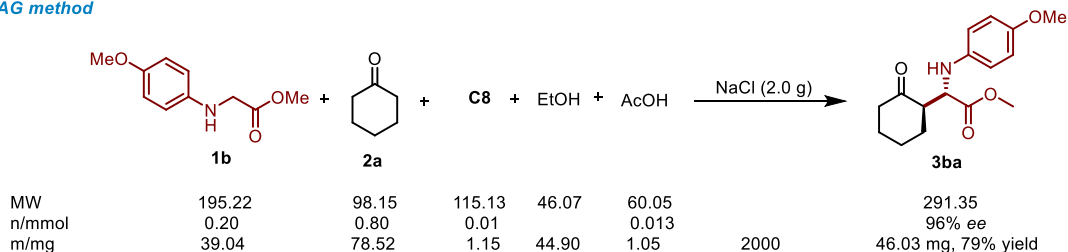

#### Zhang's method

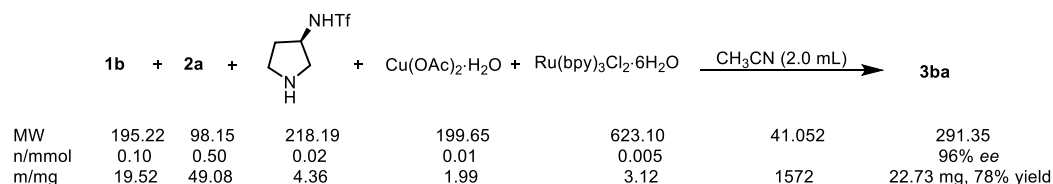

#### Mei's method

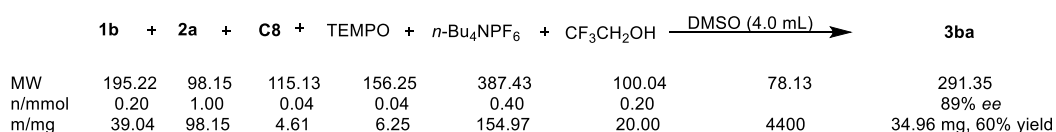

#### Wang's method

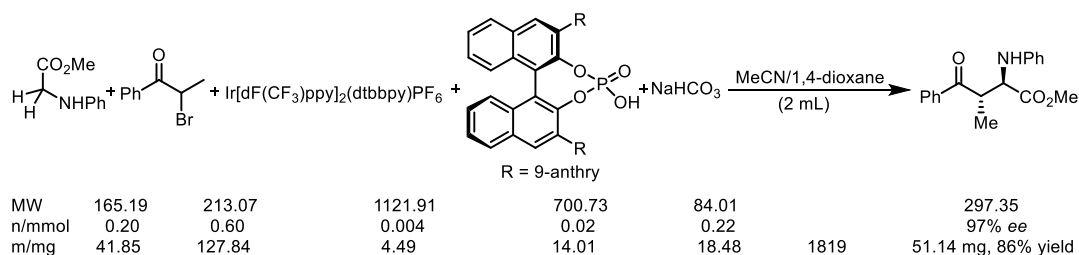

#### Tanaka's method

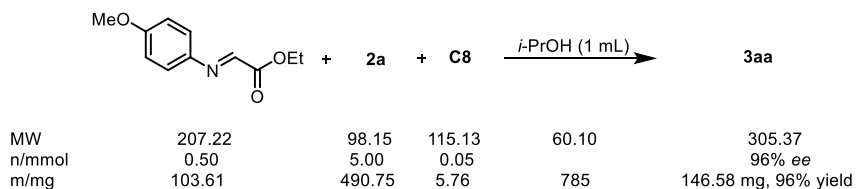

**Table S7.** Comparison of green chemistry metrics.

| Entry   |           | LAG method | Zhang's work | Mei's work | Wang's work | Tanaka's work |
|---------|-----------|------------|--------------|------------|-------------|---------------|
| Product | Yield (%) | 79         | 78           | 60         | 86          | 96            |

|                          |          |       |       |        |       |       |
|--------------------------|----------|-------|-------|--------|-------|-------|
|                          | ee (%)   | 96    | 96    | 89     | 97    | 96    |
|                          | dr       | >99:1 | 97:3  | >99:1  | >20:1 | >99:1 |
| Effective Mass Yield     | EMY (%)  | 25.68 | 1.39  | 0.74   | 2.52  | 10.58 |
| Atom Economy             | AE (%)   | 49.56 | 42.47 | 42.47  | 36.97 | 25.69 |
| Atom Efficiency          | AEF (%)  | 39.15 | 33.13 | 25.48  | 31.79 | 24.66 |
| Reaction Mass Efficiency | RME (%)  | 39.15 | 33.13 | 25.48  | 30.14 | 24.66 |
| Optimum Efficiency       | OE (%)   | 79.00 | 78.01 | 60.00  | 81.53 | 96.00 |
| Process Mass Intensity   | PMI      | 3.89  | 71.74 | 135.10 | 39.61 | 9.45  |
| Mass Intensity           | MI       | 3.55  | 69.16 | 135.10 | 39.61 | 9.45  |
| Mass Productivity        | MP (%)   | 25.69 | 1.45  | 0.74   | 2.52  | 10.58 |
| E-Factor                 | E-Factor | 2.89  | 70.74 | 134.10 | 38.61 | 8.45  |
| Solvent Intensity        | SI       | 0.98  | 69.16 | 125.86 | 35.57 | 5.36  |
| Reaction Time            | h        | 1.33  | >3    | 8      | 24    | 12    |

**Table S8.** Calculation of eco-scale score of LAG method for the preparation of **3ba**.

| Parameters                                                                                                                                                                                                                                                                                                                                                                                                                                                                                                                                                                                                                      | Penalty points (LAG method)                   |                                 |                                 |                        |  |  |                         |      |      |                         |        |       |                  |       |      |                     |       |         |                   |       |       |  |
|---------------------------------------------------------------------------------------------------------------------------------------------------------------------------------------------------------------------------------------------------------------------------------------------------------------------------------------------------------------------------------------------------------------------------------------------------------------------------------------------------------------------------------------------------------------------------------------------------------------------------------|-----------------------------------------------|---------------------------------|---------------------------------|------------------------|--|--|-------------------------|------|------|-------------------------|--------|-------|------------------|-------|------|---------------------|-------|---------|-------------------|-------|-------|--|
| <b>1. Yield (100-x)/2</b><br>Mechanochemical synthesis: 79%                                                                                                                                                                                                                                                                                                                                                                                                                                                                                                                                                                     | <b>10.5</b>                                   |                                 |                                 |                        |  |  |                         |      |      |                         |        |       |                  |       |      |                     |       |         |                   |       |       |  |
| <b>2. Price of reaction components (to obtain 10 mmol of end product)</b>                                                                                                                                                                                                                                                                                                                                                                                                                                                                                                                                                       |                                               |                                 |                                 |                        |  |  |                         |      |      |                         |        |       |                  |       |      |                     |       |         |                   |       |       |  |
| <table border="1"> <thead> <tr> <th>Reaction components to get 10 mmol of product</th> <th>Price/g or mL</th> <th>Price to get 10 mmol of product</th> </tr> </thead> <tbody> <tr> <td>a. <b>1c</b> (2.471 g)</td> <td></td> <td></td> </tr> <tr> <td>b. <b>2a</b> (5.215 mL)</td> <td>0.08</td> <td>0.42</td> </tr> <tr> <td>c. <b>C8</b> (0.0146 g)</td> <td>112.70</td> <td>1.646</td> </tr> <tr> <td>d. EtOH (3.6 mL)</td> <td>0.063</td> <td>0.23</td> </tr> <tr> <td>e. AcOH (0.0126 mL)</td> <td>0.020</td> <td>0.00026</td> </tr> <tr> <td>f. NaCl (25.32 g)</td> <td>0.012</td> <td>0.304</td> </tr> </tbody> </table> | Reaction components to get 10 mmol of product | Price/g or mL                   | Price to get 10 mmol of product | a. <b>1c</b> (2.471 g) |  |  | b. <b>2a</b> (5.215 mL) | 0.08 | 0.42 | c. <b>C8</b> (0.0146 g) | 112.70 | 1.646 | d. EtOH (3.6 mL) | 0.063 | 0.23 | e. AcOH (0.0126 mL) | 0.020 | 0.00026 | f. NaCl (25.32 g) | 0.012 | 0.304 |  |
| Reaction components to get 10 mmol of product                                                                                                                                                                                                                                                                                                                                                                                                                                                                                                                                                                                   | Price/g or mL                                 | Price to get 10 mmol of product |                                 |                        |  |  |                         |      |      |                         |        |       |                  |       |      |                     |       |         |                   |       |       |  |
| a. <b>1c</b> (2.471 g)                                                                                                                                                                                                                                                                                                                                                                                                                                                                                                                                                                                                          |                                               |                                 |                                 |                        |  |  |                         |      |      |                         |        |       |                  |       |      |                     |       |         |                   |       |       |  |
| b. <b>2a</b> (5.215 mL)                                                                                                                                                                                                                                                                                                                                                                                                                                                                                                                                                                                                         | 0.08                                          | 0.42                            |                                 |                        |  |  |                         |      |      |                         |        |       |                  |       |      |                     |       |         |                   |       |       |  |
| c. <b>C8</b> (0.0146 g)                                                                                                                                                                                                                                                                                                                                                                                                                                                                                                                                                                                                         | 112.70                                        | 1.646                           |                                 |                        |  |  |                         |      |      |                         |        |       |                  |       |      |                     |       |         |                   |       |       |  |
| d. EtOH (3.6 mL)                                                                                                                                                                                                                                                                                                                                                                                                                                                                                                                                                                                                                | 0.063                                         | 0.23                            |                                 |                        |  |  |                         |      |      |                         |        |       |                  |       |      |                     |       |         |                   |       |       |  |
| e. AcOH (0.0126 mL)                                                                                                                                                                                                                                                                                                                                                                                                                                                                                                                                                                                                             | 0.020                                         | 0.00026                         |                                 |                        |  |  |                         |      |      |                         |        |       |                  |       |      |                     |       |         |                   |       |       |  |
| f. NaCl (25.32 g)                                                                                                                                                                                                                                                                                                                                                                                                                                                                                                                                                                                                               | 0.012                                         | 0.304                           |                                 |                        |  |  |                         |      |      |                         |        |       |                  |       |      |                     |       |         |                   |       |       |  |
| total price (Mechanochemical synthesis) = \$2.596<br>Expensive (> \$10 and <\$50)                                                                                                                                                                                                                                                                                                                                                                                                                                                                                                                                               | <b>0</b>                                      |                                 |                                 |                        |  |  |                         |      |      |                         |        |       |                  |       |      |                     |       |         |                   |       |       |  |
| <b>3. Safety</b><br>EtOH (F, highly flammable)                                                                                                                                                                                                                                                                                                                                                                                                                                                                                                                                                                                  | <b>5</b>                                      |                                 |                                 |                        |  |  |                         |      |      |                         |        |       |                  |       |      |                     |       |         |                   |       |       |  |
| <b>4. Technical setup</b><br>Mechanochemical synthesis:<br>Unconventional activation technique (mechanical activation)                                                                                                                                                                                                                                                                                                                                                                                                                                                                                                          | <b>2</b>                                      |                                 |                                 |                        |  |  |                         |      |      |                         |        |       |                  |       |      |                     |       |         |                   |       |       |  |
| <b>5. Temperature/Time</b><br>Mechanochemical synthesis: Room temperature, <24 h                                                                                                                                                                                                                                                                                                                                                                                                                                                                                                                                                | <b>1</b>                                      |                                 |                                 |                        |  |  |                         |      |      |                         |        |       |                  |       |      |                     |       |         |                   |       |       |  |
| <b>6. Workup and purification</b><br>Mechanochemical synthesis: Classical chromatography                                                                                                                                                                                                                                                                                                                                                                                                                                                                                                                                        | <b>0</b>                                      |                                 |                                 |                        |  |  |                         |      |      |                         |        |       |                  |       |      |                     |       |         |                   |       |       |  |

|                        |             |
|------------------------|-------------|
| <b>Total</b>           | <b>19.5</b> |
| <b>Eco-scale score</b> | <b>81.5</b> |

**Table S9.** Calculation of eco-scale score of Zhang's method for the preparation of **3ba**.

| Parameters                                                                                  |                      |                                        | Penalty points (Zhang's method) |
|---------------------------------------------------------------------------------------------|----------------------|----------------------------------------|---------------------------------|
| <b>1. Yield (100-x)/2</b><br>Synthesis: 78%                                                 |                      |                                        | <b>11</b>                       |
| <b>2. Price of reaction components (to obtain 10 mmol of end product)</b>                   |                      |                                        |                                 |
| <b>Reaction components to get 10 mmol of product</b>                                        | <b>Price/g or mL</b> | <b>Price to get 10 mmol of product</b> |                                 |
| a. <b>1c</b> (2.502 g)                                                                      |                      |                                        |                                 |
| b. <b>2a</b> (6.601 mL)                                                                     | 101.44               | 253.80                                 |                                 |
| c. C <sub>5</sub> H <sub>9</sub> F <sub>3</sub> N <sub>2</sub> O <sub>2</sub> S (0.559 g)   | 0.08                 | 0.53                                   |                                 |
| d. Cu(OAc) <sub>2</sub> ·H <sub>2</sub> O (0.255 g)                                         | 0.039                | 0.01                                   |                                 |
| e. Ru(bpy) <sub>3</sub> Cl <sub>2</sub> ·6H <sub>2</sub> O (0.400 g)                        | 18.80                | 7.52                                   |                                 |
| f. MeCN (256.6 mL)                                                                          | 0.0083               | 2.14                                   |                                 |
| total price (Mechanochemical synthesis) = \$264<br><b>Very expensive (&gt; \$50)</b>        |                      |                                        | <b>5</b>                        |
| <b>3. Safety</b>                                                                            |                      |                                        |                                 |
| a. Cu(OAc) <sub>2</sub> ·H <sub>2</sub> O (N, dangerous for environment)                    |                      |                                        | <b>5</b>                        |
| b. MeCN (T, toxic)                                                                          |                      |                                        | <b>5</b>                        |
| c. MeCN (F+, extremely flammable)                                                           |                      |                                        | <b>10</b>                       |
| <b>4. Technical setup</b>                                                                   |                      |                                        |                                 |
| Photocatalytic synthesis:<br>Unconventional activation technique (photochemical activation) |                      |                                        | <b>2</b>                        |
| <b>5. Temperature/Time</b>                                                                  |                      |                                        |                                 |
| Photocatalytic synthesis: Room temperature, <24 h                                           |                      |                                        | <b>1</b>                        |
| <b>6. Workup and purification</b>                                                           |                      |                                        |                                 |
| Photocatalytic synthesis: Classical chromatography                                          |                      |                                        | <b>0</b>                        |
| <b>Total</b>                                                                                |                      |                                        | <b>39</b>                       |
| <b>Eco-scale score</b>                                                                      |                      |                                        | <b>61</b>                       |

**Table S10.** Calculation of eco-scale score of Mei's method for the preparation of **3ba**.

| Parameters                                                                |                      |                        | Penalty points (Mei's method) |
|---------------------------------------------------------------------------|----------------------|------------------------|-------------------------------|
| <b>1. Yield (100-x)/2</b><br>Synthesis: 60%                               |                      |                        | <b>20</b>                     |
| <b>2. Price of reaction components (to obtain 10 mmol of end product)</b> |                      |                        |                               |
| <b>Reaction components</b>                                                | <b>Price/g or mL</b> | <b>Price to get 10</b> |                               |

|                                                                                           |        |                        |           |
|-------------------------------------------------------------------------------------------|--------|------------------------|-----------|
| <b>to get 10 mmol of product</b>                                                          |        | <b>mmol of product</b> |           |
| a. <b>1c</b> (3.254 g)                                                                    |        |                        |           |
| b. <b>2a</b> (8.583 mL)                                                                   | 0.08   | 0.68                   |           |
| c. <b>L8</b> (0.384 g)                                                                    | 112.70 | 43.27                  |           |
| d. TEMPO (0.521 g)                                                                        | 3.0596 | 1.59                   |           |
| e. <i>n</i> -Bu <sub>4</sub> NPF <sub>6</sub> (12.915 g)                                  | 0.667  | 8.62                   |           |
| f. CF <sub>3</sub> CH <sub>2</sub> OH (1.667 g)                                           | 4.1722 | 6.95                   |           |
| g. DMSO (333.4 mL)                                                                        | 0.0092 | 3.06                   |           |
| total price (Mechanochemical synthesis) = \$64.17<br>Very expensive (> \$50)              |        |                        | <b>5</b>  |
| <b>3. Safety</b>                                                                          |        |                        |           |
| a. CF <sub>3</sub> CH <sub>2</sub> OH (T, toxic)                                          |        |                        | <b>5</b>  |
| b. CF <sub>3</sub> CH <sub>2</sub> OH (F, highly flammable)                               |        |                        | <b>5</b>  |
| c. DMSO (T, toxic)                                                                        |        |                        | <b>5</b>  |
| d. DMSO (F+, extremely flammable)                                                         |        |                        | <b>10</b> |
| <b>4. Technical setup</b>                                                                 |        |                        |           |
| Electrochemical synthesis:<br>Unconventional activation technique (electrical activation) |        |                        | <b>2</b>  |
| <b>5. Temperature/Time</b>                                                                |        |                        |           |
| Electrochemical synthesis: Room temperature, <24 h                                        |        |                        | <b>1</b>  |
| <b>6. Workup and purification</b>                                                         |        |                        |           |
| Electrochemical synthesis: Classical chromatography                                       |        |                        | <b>0</b>  |
| <b>Total</b>                                                                              |        |                        | <b>53</b> |
| <b>Eco-scale score</b>                                                                    |        |                        | <b>47</b> |

**Table S11.** Calculation of eco-scale score of Wang's method.

| <b>Parameters</b>                                                              |                      |                                        | <b>Penalty points (Wang's method)</b> |
|--------------------------------------------------------------------------------|----------------------|----------------------------------------|---------------------------------------|
| <b>1. Yield (100-x)/2</b><br>Synthesis: 86%                                    |                      |                                        | <b>7</b>                              |
| <b>2. Price of reaction components (to obtain 10 mmol of end product)</b>      |                      |                                        |                                       |
| <b>Reaction components to get 10 mmol of product</b>                           | <b>Price/g or mL</b> | <b>Price to get 10 mmol of product</b> |                                       |
| a. C <sub>9</sub> H <sub>11</sub> NO <sub>2</sub> (2.433 g)                    | 0.4033               | 0.98                                   |                                       |
| b. C <sub>9</sub> H <sub>9</sub> Br (7.4333 g)                                 |                      |                                        |                                       |
| c. Ir[dF(CF <sub>3</sub> )ppy] <sub>2</sub> (dtb bpy)PF <sub>6</sub> (0.261 g) | 237.65               | 62.03                                  |                                       |
| d. Ligand (0.815 g)                                                            | 624.30               | 508.80                                 |                                       |
| e. NaHCO <sub>3</sub> (1.074 g)                                                | 0.0042               | 0.0045                                 |                                       |
| f. MeCN (58.14 mL)                                                             | 0.0083               | 0.48                                   |                                       |
| g. 1,4-dioxane (58.14 mL)                                                      | 0.0078               | 0.45                                   |                                       |

|                                                                                                                          |                                   |
|--------------------------------------------------------------------------------------------------------------------------|-----------------------------------|
| total price (Mechanochemical synthesis) = \$686.47<br>Very expensive (> \$50)                                            | <b>5</b>                          |
| <b>3. Safety</b><br>a. MeCN (T, toxic)<br>b. MeCN (F+, extremely flammable)<br>c. 1,4-dioxane (F, highly flammable)      | <b>5</b><br><b>10</b><br><b>5</b> |
| <b>4. Technical setup</b><br>Photocatalytic synthesis:<br>Unconventional activation technique (photochemical activation) | <b>2</b>                          |
| <b>5. Temperature/Time</b><br>Photocatalytic synthesis: Room temperature, <24 h                                          | <b>1</b>                          |
| <b>6. Workup and purification</b><br>Photocatalytic synthesis: Classical chromatography                                  | <b>0</b>                          |
| <b>Total</b>                                                                                                             | <b>35</b>                         |
| <b>Eco-scale score</b>                                                                                                   | <b>65</b>                         |

**Table S12.** Calculation of eco-scale score of Tanaka's method.

| Parameters                                                                                                                                                                                                                                                                                                                                                                                                                                                                                                                 | Penalty points (Tanaka's method)              |                                 |                                 |                                                              |  |  |                         |      |      |                        |        |       |                          |       |      |  |
|----------------------------------------------------------------------------------------------------------------------------------------------------------------------------------------------------------------------------------------------------------------------------------------------------------------------------------------------------------------------------------------------------------------------------------------------------------------------------------------------------------------------------|-----------------------------------------------|---------------------------------|---------------------------------|--------------------------------------------------------------|--|--|-------------------------|------|------|------------------------|--------|-------|--------------------------|-------|------|--|
| <b>1. Yield (100-x)/2</b><br>Synthesis: 96%                                                                                                                                                                                                                                                                                                                                                                                                                                                                                | <b>2</b>                                      |                                 |                                 |                                                              |  |  |                         |      |      |                        |        |       |                          |       |      |  |
| <b>2. Price of reaction components (to obtain 10 mmol of end product)</b>                                                                                                                                                                                                                                                                                                                                                                                                                                                  |                                               |                                 |                                 |                                                              |  |  |                         |      |      |                        |        |       |                          |       |      |  |
| <table border="1"> <thead> <tr> <th>Reaction components to get 10 mmol of product</th> <th>Price/g or mL</th> <th>Price to get 10 mmol of product</th> </tr> </thead> <tbody> <tr> <td>a. C<sub>11</sub>H<sub>13</sub>NO<sub>3</sub> (2.158 g)</td> <td></td> <td></td> </tr> <tr> <td>b. <b>2a</b> (10.73 mL)</td> <td>0.08</td> <td>0.86</td> </tr> <tr> <td>c. <b>C8</b> (0.112 g)</td> <td>112.70</td> <td>12.62</td> </tr> <tr> <td>d. <i>i</i>-PrOH (3 mL)</td> <td>0.005</td> <td>0.10</td> </tr> </tbody> </table> | Reaction components to get 10 mmol of product | Price/g or mL                   | Price to get 10 mmol of product | a. C <sub>11</sub> H <sub>13</sub> NO <sub>3</sub> (2.158 g) |  |  | b. <b>2a</b> (10.73 mL) | 0.08 | 0.86 | c. <b>C8</b> (0.112 g) | 112.70 | 12.62 | d. <i>i</i> -PrOH (3 mL) | 0.005 | 0.10 |  |
| Reaction components to get 10 mmol of product                                                                                                                                                                                                                                                                                                                                                                                                                                                                              | Price/g or mL                                 | Price to get 10 mmol of product |                                 |                                                              |  |  |                         |      |      |                        |        |       |                          |       |      |  |
| a. C <sub>11</sub> H <sub>13</sub> NO <sub>3</sub> (2.158 g)                                                                                                                                                                                                                                                                                                                                                                                                                                                               |                                               |                                 |                                 |                                                              |  |  |                         |      |      |                        |        |       |                          |       |      |  |
| b. <b>2a</b> (10.73 mL)                                                                                                                                                                                                                                                                                                                                                                                                                                                                                                    | 0.08                                          | 0.86                            |                                 |                                                              |  |  |                         |      |      |                        |        |       |                          |       |      |  |
| c. <b>C8</b> (0.112 g)                                                                                                                                                                                                                                                                                                                                                                                                                                                                                                     | 112.70                                        | 12.62                           |                                 |                                                              |  |  |                         |      |      |                        |        |       |                          |       |      |  |
| d. <i>i</i> -PrOH (3 mL)                                                                                                                                                                                                                                                                                                                                                                                                                                                                                                   | 0.005                                         | 0.10                            |                                 |                                                              |  |  |                         |      |      |                        |        |       |                          |       |      |  |
| total price (Mechanochemical synthesis) = \$13.58<br>Expensive (> \$10 and <\$50)                                                                                                                                                                                                                                                                                                                                                                                                                                          | <b>3</b>                                      |                                 |                                 |                                                              |  |  |                         |      |      |                        |        |       |                          |       |      |  |
| <b>3.Safety</b><br><i>i</i> -PrOH (F, highly flammable)                                                                                                                                                                                                                                                                                                                                                                                                                                                                    | <b>5</b>                                      |                                 |                                 |                                                              |  |  |                         |      |      |                        |        |       |                          |       |      |  |
| <b>4. Technical setup:</b><br>Solution synthesis: Common setup                                                                                                                                                                                                                                                                                                                                                                                                                                                             | <b>0</b>                                      |                                 |                                 |                                                              |  |  |                         |      |      |                        |        |       |                          |       |      |  |
| <b>5. Temperature/Time</b><br>Solution synthesis: Room temperature, <24 h                                                                                                                                                                                                                                                                                                                                                                                                                                                  | <b>1</b>                                      |                                 |                                 |                                                              |  |  |                         |      |      |                        |        |       |                          |       |      |  |
| <b>6. Workup and purification</b><br>Solution synthesis: Classical chromatography                                                                                                                                                                                                                                                                                                                                                                                                                                          | <b>0</b>                                      |                                 |                                 |                                                              |  |  |                         |      |      |                        |        |       |                          |       |      |  |
| <b>Total</b>                                                                                                                                                                                                                                                                                                                                                                                                                                                                                                               | <b>11</b>                                     |                                 |                                 |                                                              |  |  |                         |      |      |                        |        |       |                          |       |      |  |
| <b>Eco-scale score</b>                                                                                                                                                                                                                                                                                                                                                                                                                                                                                                     | <b>89</b>                                     |                                 |                                 |                                                              |  |  |                         |      |      |                        |        |       |                          |       |      |  |



### 3.9 Crystal data for 3ha.

Single crystal of minor diastereomers of **3ha** suitable for X-ray analysis was obtained by slow evaporation of 0.01 M solution in 7:3 mixture of petroleum ether/ ethyl acetate at room temperature. A suitable crystal was selected on a Bruker APEX-II CCD diffractometer. The crystal was kept at 296.15 K during data collection. Using Olex2,<sup>3</sup> the structure was solved with the SHELXT<sup>4</sup> structure solution program using Intrinsic Phasing and refined with the SHELXT refinement package using Least Squares minimisation.

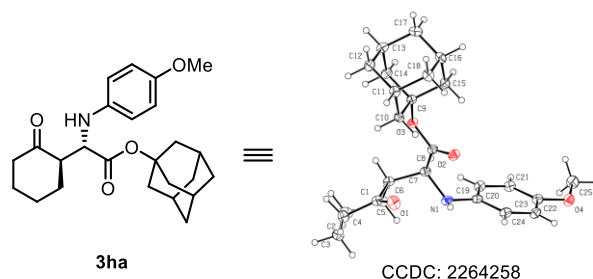

**Table S13.** Crystal data and structure refinement for compound **3ha**.

|                                    |                                                               |
|------------------------------------|---------------------------------------------------------------|
| Identification code                | cu_230519_CH_3ka_0m                                           |
| Empirical formula                  | C <sub>25</sub> H <sub>33</sub> NO <sub>4</sub>               |
| Formula weight                     | 411.52                                                        |
| Temperature/K                      | 170.00                                                        |
| Crystal system                     | orthorhombic                                                  |
| Space group                        | P2 <sub>1</sub> 2 <sub>1</sub> 2 <sub>1</sub>                 |
| a/Å                                | 6.82470(10)                                                   |
| b/Å                                | 15.1975(3)                                                    |
| c/Å                                | 20.6745(4)                                                    |
| α/°                                | 90                                                            |
| β/°                                | 90                                                            |
| γ/°                                | 90                                                            |
| Volume/Å <sup>3</sup>              | 2144.33(7)                                                    |
| Z                                  | 4                                                             |
| ρ <sub>calc</sub> /cm <sup>3</sup> | 1.275                                                         |
| μ/mm <sup>-1</sup>                 | 0.682                                                         |
| F(000)                             | 888.0                                                         |
| Crystal size/mm <sup>3</sup>       | 0.48 × 0.26 × 0.2                                             |
| Radiation                          | CuKα (λ = 1.54178)                                            |
| 2θ range for data collection/°     | 7.218 to 149.136                                              |
| Index ranges                       | -8 ≤ h ≤ 7, -19 ≤ k ≤ 19, -25 ≤ l ≤ 25                        |
| Reflections collected              | 22064                                                         |
| Independent reflections            | 4363 [R <sub>int</sub> = 0.0621, R <sub>sigma</sub> = 0.0384] |
| Data/restraints/parameters         | 4363/1/275                                                    |
| Goodness-of-fit on F <sup>2</sup>  | 1.032                                                         |
| Final R indexes [I >= 2σ (I)]      | R <sub>1</sub> = 0.0407, wR <sub>2</sub> = 0.1041             |

|                                             |                                                   |
|---------------------------------------------|---------------------------------------------------|
| Final R indexes [all data]                  | R <sub>1</sub> = 0.0464, wR <sub>2</sub> = 0.1077 |
| Largest diff. peak/hole / e Å <sup>-3</sup> | 0.25/-0.21                                        |
| Flack parameter                             | -0.12(12)                                         |

**Table S14.** Fractional Atomic Coordinates ( $\times 10^4$ ) and Equivalent Isotropic Displacement Parameters ( $\text{\AA}^2 \times 10^3$ ) for cu\_230519\_CH\_3ka\_0m.  $U_{\text{eq}}$  is defined as 1/3 of the trace of the orthogonalised  $U_{ij}$  tensor.

| Atom | x        | y          | z          | U(eq)   |
|------|----------|------------|------------|---------|
| O1   | 6185(3)  | 3537.6(14) | 5434.7(11) | 41.4(5) |
| O2   | 6052(3)  | 5381.0(13) | 4782.1(8)  | 34.3(4) |
| O3   | 4854(2)  | 5660.5(11) | 5785.7(8)  | 27.8(3) |
| O4   | -764(3)  | 5649.6(14) | 2380.5(9)  | 38.0(4) |
| N1   | 3115(3)  | 4213.0(14) | 4516.1(10) | 30.2(4) |
| C1   | 4722(3)  | 3389.9(16) | 5744.8(12) | 27.6(5) |
| C2   | 4586(4)  | 2621.7(18) | 6204.1(13) | 35.7(6) |
| C3   | 2669(4)  | 2112.7(17) | 6138.7(14) | 35.8(5) |
| C4   | 922(4)   | 2738.8(18) | 6187.8(14) | 37.3(6) |
| C5   | 1036(4)  | 3439.4(17) | 5660.5(14) | 35.1(5) |
| C6   | 2933(3)  | 3984.6(14) | 5701.9(11) | 25.7(4) |
| C7   | 3101(3)  | 4649.9(15) | 5144.8(11) | 26.4(4) |
| C8   | 4873(3)  | 5262.9(15) | 5203.8(11) | 26.6(4) |
| C9   | 6514(3)  | 6206.5(15) | 6002.7(11) | 24.2(4) |
| C10  | 8341(3)  | 5636.7(15) | 6070.8(11) | 27.5(5) |
| C11  | 9989(4)  | 6202.0(17) | 6366.5(12) | 30.4(5) |
| C12  | 9347(4)  | 6533.4(19) | 7034.4(12) | 35.1(5) |
| C13  | 7510(4)  | 7102.6(18) | 6959.8(12) | 34.1(5) |
| C14  | 5858(4)  | 6540.2(17) | 6664.5(11) | 29.4(5) |
| C15  | 6903(4)  | 6987.6(15) | 5552.6(12) | 27.7(5) |
| C16  | 8560(4)  | 7546.2(16) | 5848.3(13) | 32.0(5) |
| C17  | 7949(4)  | 7882.2(17) | 6513.9(14) | 36.9(6) |
| C18  | 10407(4) | 6979.1(17) | 5915.5(13) | 33.2(5) |
| C19  | 2094(3)  | 4598.6(15) | 3997.2(12) | 27.5(4) |
| C20  | 205(4)   | 4932.4(16) | 4061.6(12) | 30.0(5) |
| C21  | -804(3)  | 5283.5(17) | 3536.0(12) | 29.8(5) |
| C22  | 76(4)    | 5298.3(16) | 2931.0(12) | 29.5(5) |
| C23  | 1936(4)  | 4940.2(17) | 2852.0(12) | 32.3(5) |
| C24  | 2929(4)  | 4603.7(16) | 3380.0(12) | 31.0(5) |
| C25  | -2535(4) | 6115(2)    | 2461.8(15) | 42.3(6) |

**Table S15.** Anisotropic Displacement Parameters ( $\text{\AA}^2 \times 10^3$ ) for cu\_230519\_CH\_3ka\_0m. The Anisotropic displacement factor exponent takes the form:  $-2\pi^2[h^2a^2U_{11}+2hka*b*U_{12}+\dots]$ .

| Atom | U <sub>11</sub> | U <sub>22</sub> | U <sub>33</sub> | U <sub>23</sub> | U <sub>13</sub> | U <sub>12</sub> |
|------|-----------------|-----------------|-----------------|-----------------|-----------------|-----------------|
| O1   | 23.6(9)         | 47.8(11)        | 52.7(11)        | 6.9(9)          | 5.8(8)          | 5.3(8)          |
| O2   | 32.7(9)         | 39.4(9)         | 30.8(8)         | -4.9(7)         | 7.4(7)          | -3.2(8)         |
| O3   | 24.8(8)         | 31.8(8)         | 26.8(7)         | -4.8(6)         | 3.4(6)          | -3.6(7)         |
| O4   | 36.8(10)        | 44.4(10)        | 32.9(8)         | 0.7(8)          | -3.0(8)         | 11.3(8)         |
| N1   | 28.0(10)        | 31.6(9)         | 31.0(10)        | -7.7(8)         | -2.7(8)         | 6.3(8)          |
| C1   | 20.8(11)        | 31.1(11)        | 30.8(10)        | -4.3(9)         | -2.5(9)         | 0.5(9)          |
| C2   | 31.1(13)        | 36.9(13)        | 38.9(13)        | 3.4(10)         | -1.2(10)        | 4.9(10)         |
| C3   | 37.0(14)        | 29.6(11)        | 40.8(13)        | 0.3(10)         | 2.8(11)         | 0.7(10)         |
| C4   | 27.3(12)        | 34.4(13)        | 50.1(15)        | -3.5(11)        | 7.0(11)         | -3.6(10)        |
| C5   | 20.6(11)        | 30.4(12)        | 54.4(15)        | -1.7(11)        | 0.0(10)         | -0.1(9)         |
| C6   | 19.7(10)        | 26.4(10)        | 31.1(10)        | -5.1(8)         | 3.2(8)          | -1.0(8)         |
| C7   | 21.5(10)        | 27.9(10)        | 29.7(11)        | -4.2(9)         | 0.1(8)          | 4.0(9)          |
| C8   | 26.0(11)        | 26.2(10)        | 27.5(10)        | -3.3(8)         | 0.0(9)          | 2.9(9)          |
| C9   | 21.6(10)        | 25.9(10)        | 25.2(10)        | -3.0(8)         | 1.3(8)          | -0.1(8)         |
| C10  | 27.9(11)        | 23.9(10)        | 30.8(10)        | 1.0(8)          | 1.9(9)          | 2.5(9)          |
| C11  | 22.9(11)        | 33.4(12)        | 34.8(12)        | 2.2(9)          | -1.7(10)        | 5.0(10)         |
| C12  | 32.8(13)        | 42.0(13)        | 30.5(12)        | -0.1(10)        | -7.6(10)        | 0.9(11)         |
| C13  | 30.9(13)        | 39.0(13)        | 32.3(12)        | -9.2(10)        | -1.2(10)        | 2.4(10)         |
| C14  | 24.3(10)        | 35.9(12)        | 28.1(10)        | -4.5(9)         | 1.8(9)          | 1.1(9)          |
| C15  | 25.2(11)        | 26.6(10)        | 31.1(11)        | 2.6(8)          | -2.2(9)         | 0.6(9)          |
| C16  | 30.6(12)        | 25.2(10)        | 40.3(13)        | 4.0(9)          | -3.0(10)        | -2.5(9)         |
| C17  | 32.3(13)        | 28.4(12)        | 50.1(15)        | -9.1(10)        | -7.4(12)        | 2.8(10)         |
| C18  | 22.7(12)        | 35.6(12)        | 41.4(13)        | 2.6(10)         | 1.2(10)         | -2.5(9)         |
| C19  | 24.8(10)        | 25.2(10)        | 32.5(11)        | -6.8(8)         | -2.6(9)         | -3.6(9)         |
| C20  | 24.6(11)        | 34.8(11)        | 30.7(11)        | -2.6(9)         | 1.2(9)          | -1.9(9)         |
| C21  | 20.0(10)        | 33.8(12)        | 35.6(12)        | -5.3(9)         | -0.1(9)         | 1.2(9)          |
| C22  | 25.8(11)        | 30.7(11)        | 31.9(11)        | -3.5(9)         | -3.9(9)         | 0.0(9)          |
| C23  | 31.0(13)        | 36.7(12)        | 29.2(11)        | -6.1(9)         | 2.8(10)         | 3.5(10)         |
| C24  | 24.3(10)        | 33.7(11)        | 35.1(12)        | -7.5(9)         | -0.2(9)         | 3.0(10)         |
| C25  | 36.9(14)        | 46.3(15)        | 43.7(14)        | 1.8(12)         | -4.0(11)        | 11.1(11)        |

**Table S16.** Bond Lengths for cu\_230519\_CH\_3ka\_0m.

| Atom | Atom | Length/Å | Atom | Atom | Length/Å |
|------|------|----------|------|------|----------|
| O1   | C1   | 1.207(3) | C9   | C14  | 1.526(3) |
| O2   | C8   | 1.200(3) | C9   | C15  | 1.531(3) |
| O3   | C8   | 1.346(3) | C10  | C11  | 1.541(3) |

**Table S16 continued.** Bond Lengths for cu\_230519\_CH\_3ka\_0m.

| Atom | Atom | Length/Å | Atom | Atom | Length/Å |
|------|------|----------|------|------|----------|
| O3   | C9   | 1.474(3) | C9   | C14  | 1.526(3) |
| O4   | C22  | 1.382(3) | C9   | C15  | 1.531(3) |
| O4   | C25  | 1.411(3) | C10  | C11  | 1.541(3) |
| N1   | C7   | 1.460(3) | C11  | C12  | 1.534(3) |
| N1   | C19  | 1.407(3) | C11  | C18  | 1.531(3) |
| C1   | C2   | 1.508(3) | C12  | C13  | 1.531(4) |
| C1   | C6   | 1.521(3) | C13  | C14  | 1.541(3) |
| C2   | C3   | 1.526(4) | C13  | C17  | 1.531(4) |
| C3   | C4   | 1.529(4) | C15  | C16  | 1.541(3) |
| C4   | C5   | 1.526(4) | C16  | C17  | 1.526(4) |
| C5   | C6   | 1.539(3) | C16  | C18  | 1.533(3) |
| C6   | C7   | 1.537(3) | C19  | C20  | 1.392(3) |
| C6   | C7   | 1.537(3) | C19  | C24  | 1.398(3) |

**Table S17.** Bond Angles for cu\_230519\_CH\_3ka\_0m.

| Atom | Atom | Atom | Length/Å   | Atom | Atom | Atom | Length/Å   |
|------|------|------|------------|------|------|------|------------|
| C8   | O3   | C9   | 121.16(18) | C9   | C10  | C11  | 108.48(18) |
| C22  | O4   | C25  | 116.8(2)   | C12  | C11  | C10  | 109.4(2)   |
| C19  | N1   | C7   | 119.10(19) | C18  | C11  | C10  | 108.92(19) |
| O1   | C1   | C2   | 122.0(2)   | C18  | C11  | C12  | 110.4(2)   |
| O1   | C1   | C6   | 121.5(2)   | C13  | C12  | C11  | 109.2(2)   |
| C2   | C1   | C6   | 116.6(2)   | C12  | C13  | C14  | 109.0(2)   |
| C1   | C2   | C3   | 112.9(2)   | C17  | C13  | C12  | 109.7(2)   |
| C2   | C3   | C4   | 110.3(2)   | C17  | C13  | C14  | 109.5(2)   |
| C5   | C4   | C3   | 110.3(2)   | C9   | C14  | C13  | 108.97(19) |
| C4   | C5   | C6   | 112.3(2)   | C9   | C15  | C16  | 108.27(19) |
| C1   | C6   | C5   | 111.00(18) | C17  | C16  | C15  | 110.0(2)   |
| C1   | C6   | C7   | 112.01(19) | C17  | C16  | C18  | 109.3(2)   |
| C7   | C6   | C5   | 112.0(2)   | C18  | C16  | C15  | 109.3(2)   |
| N1   | C7   | C6   | 111.62(19) | C16  | C17  | C13  | 109.7(2)   |
| N1   | C7   | C8   | 110.04(19) | C11  | C18  | C16  | 109.6(2)   |
| C8   | C7   | C6   | 113.55(18) | C20  | C19  | N1   | 122.5(2)   |
| O2   | C8   | O3   | 126.0(2)   | C20  | C19  | C24  | 117.6(2)   |
| O2   | C8   | C7   | 124.2(2)   | C24  | C19  | N1   | 119.8(2)   |
| O3   | C8   | C7   | 109.68(19) | C19  | C20  | C21  | 121.5(2)   |
| O3   | C9   | C10  | 109.69(17) | C22  | C21  | C20  | 119.7(2)   |
| O3   | C9   | C14  | 103.57(17) | O4   | C22  | C21  | 124.7(2)   |
| O3   | C9   | C15  | 112.63(18) | O4   | C22  | C23  | 115.7(2)   |
| C10  | C9   | C14  | 110.22(19) | C21  | C22  | C23  | 119.6(2)   |
| C10  | C9   | C15  | 110.75(18) | C24  | C23  | C22  | 119.9(2)   |
| C14  | C9   | C15  | 109.75(19) | C23  | C24  | C19  | 121.5(2)   |

**Table S18.** Torsion Angles for cu\_230519\_CH\_3ka\_0m.

| A  | B   | C   | D   | Angle/°     | A   | B   | C   | D   | Angle/°   |
|----|-----|-----|-----|-------------|-----|-----|-----|-----|-----------|
| O1 | C1  | C2  | C3  | -134.7(3)   | C9  | C15 | C16 | C17 | -60.2(2)  |
| O1 | C1  | C6  | C5  | 136.6(3)    | C9  | C15 | C16 | C18 | 59.8(3)   |
| O1 | C1  | C6  | C7  | 10.6(3)     | C10 | C9  | C14 | C13 | 60.8(3)   |
| O3 | C9  | C10 | C11 | -174.07(17) | C10 | C9  | C15 | C16 | -60.6(2)  |
| O3 | C9  | C14 | C13 | 178.12(19)  | C10 | C11 | C12 | C13 | -61.0(3)  |
| O3 | C9  | C15 | C16 | 176.10(18)  | C10 | C11 | C18 | C16 | 61.1(3)   |
| O4 | C22 | C23 | C24 | 177.5(2)    | C11 | C12 | C13 | C14 | 60.7(3)   |
| N1 | C7  | C8  | O2  | 2.2(3)      | C11 | C12 | C13 | C17 | -59.2(3)  |
| N1 | C7  | C8  | O3  | -179.75(19) | C12 | C11 | C18 | C16 | -59.0(3)  |
| N1 | C19 | C20 | C21 | -177.7(2)   | C12 | C13 | C14 | C9  | -60.3(3)  |
| N1 | C19 | C24 | C23 | 177.0(2)    | C12 | C13 | C17 | C16 | 60.5(3)   |
| C1 | C2  | C3  | C4  | -52.4(3)    | C14 | C9  | C10 | C11 | -60.6(2)  |
| C1 | C6  | C7  | N1  | 65.2(2)     | C14 | C9  | C15 | C16 | 61.3(2)   |
| C1 | C6  | C7  | C8  | -59.9(2)    | C14 | C13 | C17 | C16 | -59.1(3)  |
| C2 | C1  | C6  | C5  | -44.7(3)    | C15 | C9  | C10 | C11 | 61.0(2)   |
| C2 | C1  | C6  | C7  | -170.7(2)   | C15 | C9  | C14 | C13 | -61.4(2)  |
| C2 | C3  | C4  | C5  | 58.9(3)     | C15 | C16 | C17 | C13 | 59.7(3)   |
| C3 | C4  | C5  | C6  | -58.9(3)    | C15 | C16 | C18 | C11 | -61.0(3)  |
| C4 | C5  | C6  | C1  | 50.4(3)     | C17 | C13 | C14 | C9  | 59.8(3)   |
| C4 | C5  | C6  | C7  | 176.4(2)    | C17 | C16 | C18 | C11 | 59.4(3)   |
| C5 | C6  | C7  | N1  | -60.3(2)    | C18 | C11 | C12 | C13 | 58.8(3)   |
| C5 | C6  | C7  | C8  | 174.62(19)  | C18 | C16 | C17 | C13 | -60.3(3)  |
| C6 | C1  | C2  | C3  | 46.6(3)     | C19 | N1  | C7  | C6  | 140.8(2)  |
| C6 | C7  | C8  | O2  | 128.1(2)    | C19 | N1  | C7  | C8  | -92.2(2)  |
| C6 | C7  | C8  | O3  | -53.8(2)    | C19 | C20 | C21 | C22 | 0.5(4)    |
| C7 | N1  | C19 | C20 | -45.3(3)    | C20 | C19 | C24 | C23 | 1.0(4)    |
| C7 | N1  | C19 | C24 | 138.9(2)    | C20 | C21 | C22 | O4  | -178.3(2) |
| C8 | O3  | C9  | C10 | -63.9(3)    | C20 | C21 | C22 | C23 | 1.8(4)    |
| C8 | O3  | C9  | C14 | 178.4(2)    | C21 | C22 | C23 | C24 | -2.5(4)   |
| C8 | O3  | C9  | C15 | 59.9(3)     | C22 | C23 | C24 | C19 | 1.1(4)    |
| C9 | O3  | C8  | O2  | -9.3(4)     | C24 | C19 | C20 | C21 | -1.8(3)   |
| C9 | O3  | C8  | C7  | 172.71(18)  | C25 | O4  | C22 | C21 | 7.8(4)    |
| C9 | C10 | C11 | C12 | 60.4(2)     | C25 | O4  | C22 | C23 | -172.2(2) |
| C9 | C10 | C11 | C18 | -60.3(2)    |     |     |     |     |           |

**Table S19.** Hydrogen Atom Coordinates ( $\text{\AA} \times 10^4$ ) and Isotropic Displacement Parameters ( $\text{\AA}^2 \times 10^3$ ) for cu\_230519\_CH\_3ka\_0m.

| Atom | x       | y       | z       | U(eq) |
|------|---------|---------|---------|-------|
| H2A  | 4708    | 2840.48 | 6653.34 | 43    |
| H2B  | 5695.23 | 2217.11 | 6121.83 | 43    |

**Table S19 continued.** Hydrogen Atom Coordinates ( $\text{\AA} \times 10^4$ ) and Isotropic Displacement Parameters ( $\text{\AA}^2 \times 10^3$ ) for cu\_230519\_CH\_3ka\_0m.

| Atom | x        | y        | z        | U(eq) |
|------|----------|----------|----------|-------|
| H3A  | 2584.32  | 1663.94  | 6484.7   | 43    |
| H3B  | 2638.27  | 1805.63  | 5716.52  | 43    |
| H4A  | -311.54  | 2402.14  | 6141.7   | 45    |
| H4B  | 918.4    | 3025.03  | 6617.9   | 45    |
| H5A  | -105.11  | 3837.82  | 5699.76  | 42    |
| H5B  | 967.41   | 3150.87  | 5231.78  | 42    |
| H6   | 2873.24  | 4329.79  | 6113.14  | 31    |
| H7   | 1902.77  | 5027.83  | 5159.69  | 32    |
| H10A | 8748.83  | 5412.86  | 5641.73  | 33    |
| H10B | 8062.66  | 5126.7   | 6354.16  | 33    |
| H11  | 11200.43 | 5837.14  | 6412.86  | 36    |
| H12A | 9062.99  | 6027.18  | 7320.93  | 42    |
| H12B | 10411.96 | 6883.59  | 7232.78  | 42    |
| H13  | 7091.7   | 7325.15  | 7393.57  | 41    |
| H14A | 5563.09  | 6036.11  | 6951.71  | 35    |
| H14B | 4653.96  | 6898.23  | 6618.65  | 35    |
| H15A | 5701.06  | 7346.87  | 5506.15  | 33    |
| H15B | 7292.67  | 6774.01  | 5118.93  | 33    |
| H16  | 8842.81  | 8057.72  | 5558.66  | 38    |
| H17A | 6769.35  | 8257     | 6472.85  | 44    |
| H17B | 9015.22  | 8243.24  | 6701.12  | 44    |
| H18A | 10811.41 | 6758.5   | 5485.19  | 40    |
| H18B | 11490.61 | 7338.19  | 6093.57  | 40    |
| H20  | -410.3   | 4920.56  | 4473.72  | 36    |
| H21  | -2089.05 | 5511.87  | 3591.44  | 36    |
| H23  | 2524.33  | 4926.79  | 2435.66  | 39    |
| H24  | 4208.01  | 4370.63  | 3321.8   | 37    |
| H25A | -2917.09 | 6383.82  | 2049.66  | 63    |
| H25B | -2354.72 | 6576.61  | 2787.65  | 63    |
| H25C | -3563.17 | 5709.27  | 2604.47  | 63    |
| H1   | 4320(40) | 4090(30) | 4400(18) | 51    |

#### 4. Characterization data

##### For substrates 1:

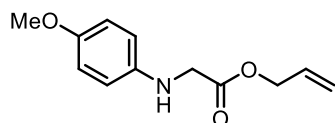

##### Allyl (4-methoxyphenyl)glycinate (**1e**)<sup>5</sup>

Yellow oil (375.7 mg, 85% yield). **<sup>1</sup>H NMR** (400 MHz, Chloroform-*d*)  $\delta$  6.79 (d, *J* = 8.9 Hz, 2H), 6.59 (d, *J* = 8.9 Hz, 2H), 6.01–5.83 (m, 1H), 5.35–5.24 (m, 2H), 4.67–4.66 (m, 2H), 3.90 (s, 2H), 3.74 (s, 3H). **<sup>13</sup>C NMR** (100 MHz, Chloroform-*d*)  $\delta$  171.06, 152.61, 141.10, 131.58, 118.74, 114.83, 114.35, 65.68, 55.63, 46.69.

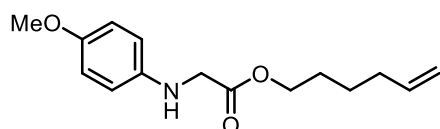

##### Hex-5-en-1-yl (4-methoxyphenyl)glycinate (**1f**)

Colorless oil (432.3 mg, 82% yield). **<sup>1</sup>H NMR** (400 MHz, Chloroform-*d*)  $\delta$  6.79 (d, *J* = 9.0 Hz, 2H), 6.58 (d, *J* = 8.9 Hz, 2H), 5.83–5.72 (m, 1H), 5.04–4.95 (m, 2H), 4.17 (t, *J* = 6.6 Hz, 2H), 3.86 (s, 2H), 3.74 (s, 3H), 2.10–2.04 (m, 2H), 1.70–1.62 (m, 2H), 1.44 (m, 2H). **<sup>13</sup>C NMR** (100 MHz, Chloroform-*d*)  $\delta$  171.44, 152.59, 141.23, 138.15, 114.86, 114.32, 65.06, 55.67, 46.75, 33.15, 27.94, 25.01. **HRMS (ESI)** *m/z*: calcd for C<sub>15</sub>H<sub>22</sub>NO<sub>3</sub> [M+H]<sup>+</sup> 264.1594, found 264.1593.

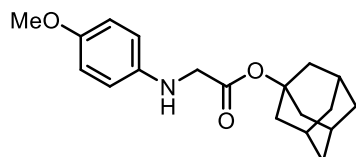

##### (1S,3S)-Adamantan-1-yl (4-methoxyphenyl)glycinate (**1h**)

White solid (460 mg, 73% yield). m.p. = 86–87 °C. **<sup>1</sup>H NMR** (400 MHz, Chloroform-*d*)  $\delta$  6.78 (d, *J* = 8.9 Hz, 2H), 6.58 (d, *J* = 8.9 Hz, 2H), 3.75 (d, *J* = 5.5 Hz, 5H), 2.14 (m, 9H), 1.66 (d, *J* = 3.1 Hz, 6H). **<sup>13</sup>C NMR** (100 MHz, Chloroform-*d*)  $\delta$  170.15, 152.50, 141.38, 114.85, 114.39, 81.89, 55.72, 47.56, 41.30, 36.05, 30.81. **HRMS (ESI)** *m/z*: calcd for C<sub>19</sub>H<sub>26</sub>NO<sub>3</sub> [M+H]<sup>+</sup> 316.1907, found 316.1906.

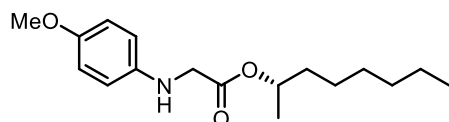

##### (S)-octan-2-yl (4-methoxyphenyl)glycinate (**1i**)

Colorless oil (439.5 mg, 75% yield). **<sup>1</sup>H NMR** (400 MHz, Chloroform-*d*)  $\delta$  6.78 (d, *J* = 8.9 Hz, 2H), 6.58 (d, *J* = 8.9 Hz, 2H), 4.99 (m, 1H), 3.83 (s, 2H), 3.73 (s, 3H), 1.64–1.44 (m, 2H), 1.31–1.21 (m, 11H), 0.88 (t, *J* = 6.8 Hz, 3H). **<sup>13</sup>C NMR** (100 MHz, Chloroform-*d*)  $\delta$  171.02, 152.55, 141.32, 114.83, 114.31, 72.22, 55.66, 46.99, 35.83, 31.65, 29.02, 25.23, 22.51, 19.91, 14.00. **HRMS (ESI)** *m/z*: calcd for C<sub>17</sub>H<sub>28</sub>NO<sub>3</sub> [M+H]<sup>+</sup> 294.2063, found 294.2051.

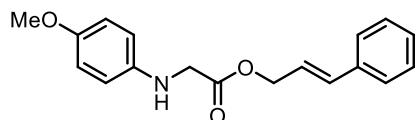

Cinnamyl (4-methoxyphenyl)glycinate (**1n**)<sup>6</sup>

Colorless oil (469.3 mg, 79% yield). **<sup>1</sup>H NMR** (600 MHz, Chloroform-*d*) δ 7.39–7.35 (m, 2H), 7.34–7.30 (m, 2H), 7.28–7.24 (m, 1H), 6.81–6.73 (m, 2H), 6.69–6.56 (m, 3H), 6.26 (m, 1H), 4.82 (m, 2H), 3.92 (s, 2H), 3.73 (s, 3H). **<sup>13</sup>C NMR** (100 MHz, Chloroform-*d*) δ 171.21, 152.72, 141.06, 135.96, 134.76, 128.59, 128.18, 126.61, 122.45, 114.89, 114.50, 65.69, 55.67, 46.88.

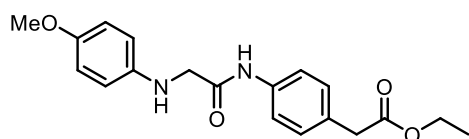

Ethyl 2-(4-(2-((4-methoxyphenyl)amino)acetamido)phenyl)acetate (**1r**)

White Solid (266.7 mg, 78% yield). m.p. = 80-81 °C. **<sup>1</sup>H NMR** (400 MHz, Chloroform-*d*) δ 8.72 (s, 1H), 7.49 (d, *J* = 8.5 Hz, 2H), 7.22 (d, *J* = 8.5 Hz, 2H), 6.80 (d, *J* = 8.9 Hz, 2H), 6.63 (d, *J* = 8.9 Hz, 2H), 4.14 (t, *J* = 7.1 Hz, 2H), 3.82 (s, 2H), 3.74 (s, 3H), 3.56 (s, 2H), 1.23 (t, *J* = 7.2 Hz, 3H). **<sup>13</sup>C NMR** (100 MHz, Chloroform-*d*) δ 171.56, 169.13, 153.48, 140.88, 136.28, 130.16, 129.78, 119.87, 114.98, 114.74, 60.84, 55.65, 50.59, 40.77, 14.11. **HRMS (ESI)** *m/z*: calcd for C<sub>19</sub>H<sub>23</sub>N<sub>2</sub>O<sub>4</sub> [M+H]<sup>+</sup> 343.1652, found 343.1645.

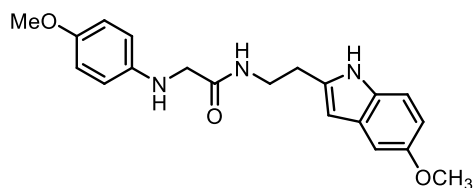

*N*-(2-(5-methoxy-1H-indol-2-yl)ethyl)-2-((4-methoxyphenyl)amino)acetamide (**1t**)

White Solid (254.2 mg, 72% yield). m.p. = 116-117 °C. **<sup>1</sup>H NMR** (400 MHz, Chloroform-*d*) δ 8.09 (s, 1H), 7.21 (d, *J* = 8.8 Hz, 1H), 7.00 (d, *J* = 2.5 Hz, 1H), 6.93 (t, *J* = 6.0 Hz, 1H), 6.84 (m, 1H), 6.75 (d, *J* = 8.9 Hz, 2H), 6.71 (d, *J* = 2.4 Hz, 1H), 6.47 (d, *J* = 8.9 Hz, 2H), 3.84 (s, 3H), 3.74 (s, 3H), 3.66 (s, 2H), 3.59 (m, 2H), 2.93–2.84 (m, 2H). **<sup>13</sup>C NMR** (100 MHz, Chloroform-*d*) δ 170.81, 153.80, 152.85, 141.13, 131.46, 127.50, 122.98, 114.79, 114.17, 112.05, 111.93, 100.35, 55.85, 55.66, 49.40, 39.00, 25.21. **HRMS (ESI)** *m/z*: calcd for C<sub>20</sub>H<sub>24</sub>N<sub>3</sub>O<sub>3</sub> [M+H]<sup>+</sup> 354.1812, found 354.1804.

**For products:**

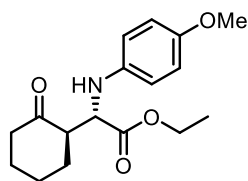

Ethyl (S)-2-((4-methoxyphenyl)amino)-2-((R)-2-oxocyclohexyl)acetate (**3aa**)<sup>7</sup>

Yellow oil (49 mg, 80% yield); > 99:1 *dr*. **<sup>1</sup>H NMR** (500 MHz, Chloroform-*d*) δ 6.76 (d, *J* = 8.9 Hz, 2H), 6.63 (d, *J* = 8.9 Hz, 2H), 4.18–4.10 (m, 2H), 3.98 (d, *J* = 4.1 Hz, 1H), 3.73 (s, 3H), 3.14–3.05 (m, 1H), 2.50–2.37 (m, 1H), 2.36–2.27 (m, 1H), 2.17–2.08 (m, 1H), 2.06–2.01 (m, 1H), 1.97–1.87 (m, 2H), 1.77–1.62 (m, 2H), 1.21 (t, *J* = 7.1 Hz, 3H). **<sup>13</sup>C NMR** (100 MHz, Chloroform-*d*) δ 211.03, 173.08, 152.74,



142.13, 115.60, 114.74, 61.19, 59.07, 55.68, 53.57, 41.80, 30.52, 26.83, 24.53, 14.09.

**Optical Rotation:**  $[\alpha]^{25}_D = 29$  ( $c = 1.0$ ,  $\text{CH}_2\text{Cl}_2$ ). The ee value was determined by **HPLC analysis:** 97.6:2.4 er, Chiralcel AD-H column, hexane/*i*-PrOH = 90/10, flow rate = 0.7 mL/min,  $\lambda = 214$  nm, retention time:  $t_{\text{major}} = 31.1$  min,  $t_{\text{minor}} = 25.6$  min.

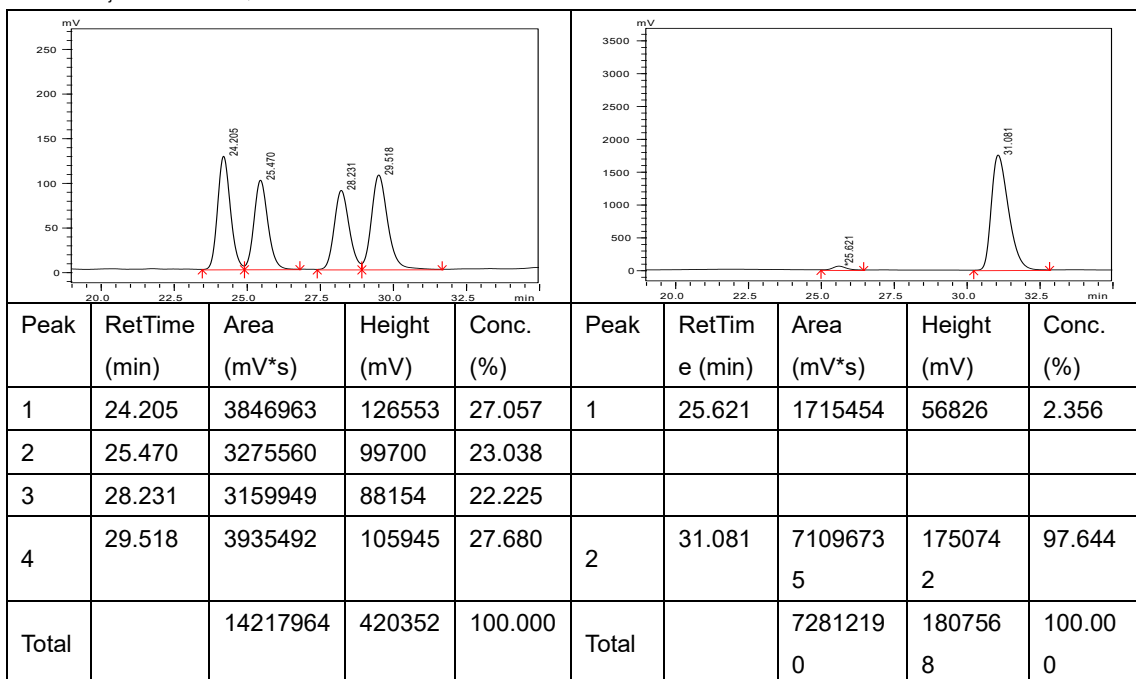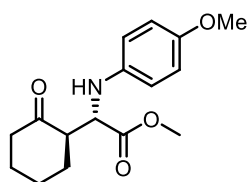

Methyl (S)-2-((4-methoxyphenyl)amino)-2-((R)-2-oxocyclohexyl)acetate (**3ba**)<sup>7</sup>

Pale yellow oil (46 mg, 79% yield); > 99:1 *dr*. **<sup>1</sup>H NMR** (400 MHz, Chloroform-*d*)  $\delta$  6.76 (d,  $J = 8.8$  Hz, 2H), 6.62 (d,  $J = 8.8$  Hz, 2H), 3.99 (d,  $J = 3.9$  Hz, 1H), 3.73 (s, 3H), 3.68 (s, 3H), 3.16–3.08 (m, 1H), 2.45–2.39 (m, 1H), 2.37–2.28 (m, 1H), 2.11–2.02 (m, 2H), 1.97–1.83 (m, 2H), 1.78–1.61 (m, 2H). **<sup>13</sup>C NMR** (100 MHz, Chloroform-*d*)  $\delta$  211.10, 173.64, 152.74, 142.02, 115.44, 114.77, 58.87, 55.67, 53.65, 52.27, 41.83, 30.56, 26.84, 24.57.

**Optical Rotation:**  $[\alpha]^{25}_D = 24.3$  ( $c = 1.0$ ,  $\text{CH}_2\text{Cl}_2$ ). The ee value was determined by **HPLC analysis:** 98.2:1.8 er, Chiralcel AD-H column, hexane/*i*-PrOH = 90/10, flow rate = 0.7 mL/min,  $\lambda = 214$  nm, retention time:  $t_{\text{major}} = 35.7$  min,  $t_{\text{minor}} = 29.1$  min.

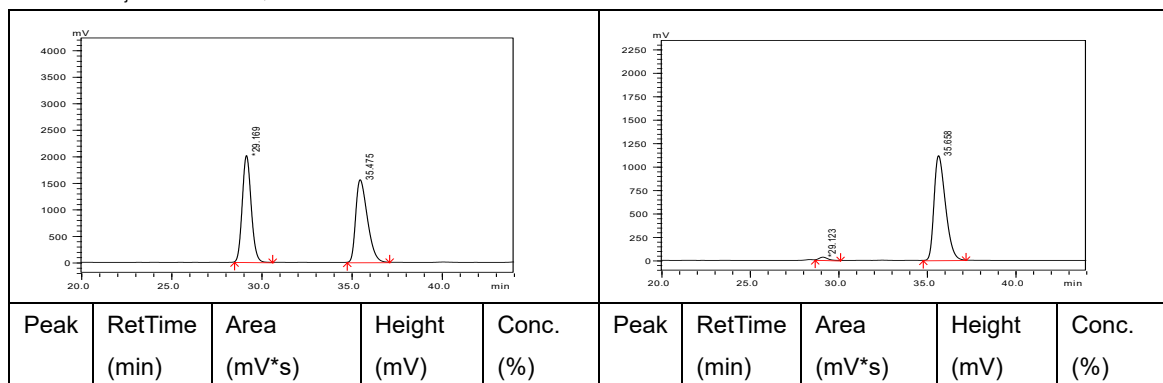

|       |        |           |         |         |       |        |          |         |         |
|-------|--------|-----------|---------|---------|-------|--------|----------|---------|---------|
| 1     | 29.169 | 68858297  | 2006741 | 49.731  | 1     | 29.123 | 907934   | 30034   | 1.795   |
| 2     | 35.475 | 69603611  | 1554593 | 50.269  | 2     | 35.658 | 49673100 | 1114778 | 98.205  |
| Total |        | 138461909 | 3561334 | 100.000 | Total |        | 50581034 | 1144812 | 100.000 |

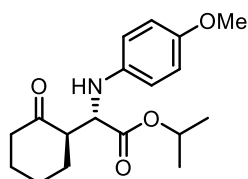

Isopropyl (S)-2-((4-methoxyphenyl)amino)-2-((R)-2-oxocyclohexyl)acetate (**3ca**)<sup>7</sup>

Yellow oil (48.5 mg, 76% yield); > 99:1 *dr*. **<sup>1</sup>H NMR** (400 MHz, Chloroform-*d*)  $\delta$  6.75 (d, *J* = 8.9 Hz, 2H), 6.63 (d, *J* = 8.9 Hz, 2H), 5.06–4.92 (m, 1H), 3.96 (d, *J* = 4.2 Hz, 1H), 3.73 (s, 3H), 3.10–3.04 (m, 1H), 2.46–2.26 (m, 2H), 2.14–2.00 (m, 2H), 1.98–1.84 (m, 2H), 1.78–1.62 (m, 2H), 1.22 (d, *J* = 6.2 Hz, 3H), 1.13 (d, *J* = 6.2 Hz, 3H). **<sup>13</sup>C NMR** (100 MHz, Chloroform-*d*)  $\delta$  210.86, 172.49, 152.72, 142.20, 115.68, 114.68, 68.74, 59.18, 55.67, 53.52, 41.73, 30.45, 26.83, 24.47, 21.62.

**Optical Rotation:**  $[\alpha]_D^{25} = 18.9$  (*c* = 1.0, CH<sub>2</sub>Cl<sub>2</sub>). The *ee* value was determined by **HPLC analysis:** 99.9:0.1 *er*, Chiralcel AD-H column, hexane/*i*-PrOH = 90/10, flow rate = 0.7 mL/min,  $\lambda$  = 254 nm, retention time: *t*<sub>major</sub> = 24.2 min, *t*<sub>minor</sub> = 21.0 min.

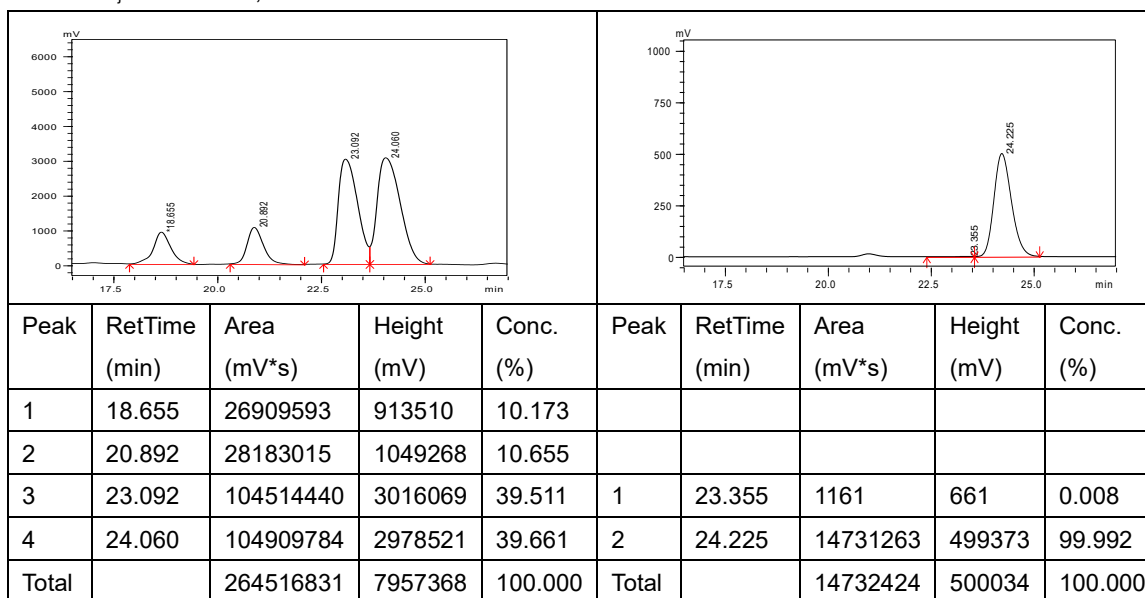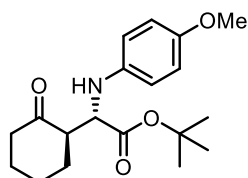

Tert-butyl (S)-2-((4-methoxyphenyl)amino)-2-((R)-2-oxocyclohexyl)acetate (**3da**)<sup>7</sup>

White solid (52 mg, 79% yield); > 99:1 *dr*. **<sup>1</sup>H NMR** (400 MHz, Chloroform-*d*)  $\delta$  6.75 (d, *J* = 8.8 Hz, 2H), 6.61 (d, *J* = 8.8 Hz, 2H), 3.92 (d, *J* = 4.3 Hz, 1H), 3.73 (s, 3H), 3.07–2.97 (m, 1H), 2.51–2.38 (m, 1H), 2.36–2.24 (m, 1H), 2.15–1.97 (m, 2H), 1.96–1.83 (m, 2H), 1.78–1.63 (m, 2H), 1.39 (s, 9H). **<sup>13</sup>C NMR** (100 MHz, Chloroform-*d*)  $\delta$  210.84, 172.00, 152.59, 142.32, 115.46, 114.67, 81.54, 59.47, 55.67, 53.45, 41.68, 30.32, 27.88, 26.78, 24.41.

**Optical Rotation:**  $[\alpha]_{25}^D = 26$  ( $c = 1.0$ ,  $\text{CH}_2\text{Cl}_2$ ). The  $ee$  value was determined by **HPLC analysis:** 99.9:0.1  $er$ , Chiralcel AD-H column, hexane/ $i$ -PrOH = 90/10, flow rate = 0.5 mL/min,  $\lambda = 214$  nm, retention time:  $t_{\text{major}} = 26.8$  min,  $t_{\text{minor}} = 40.5$  min.

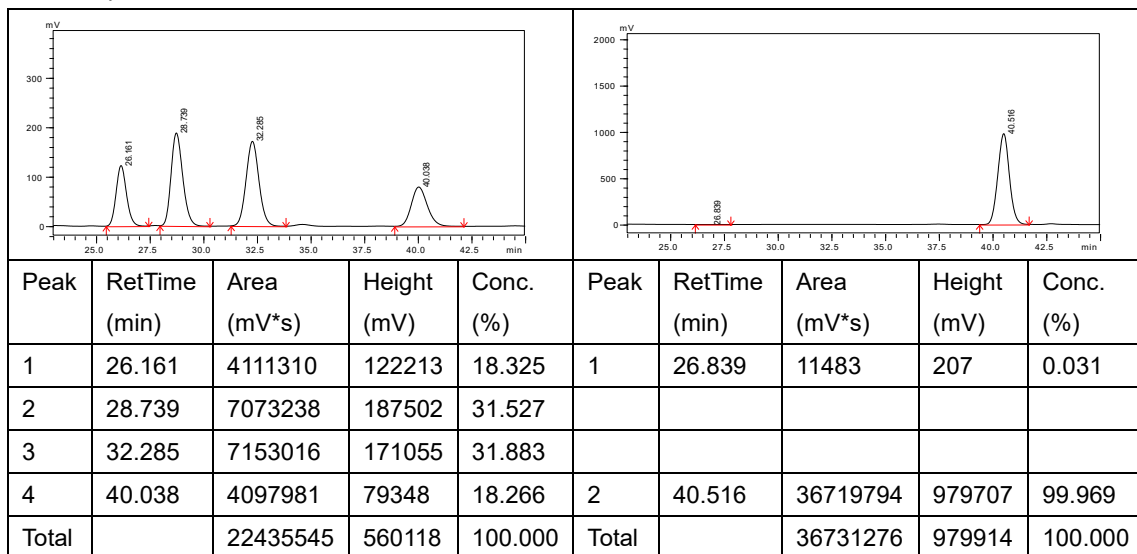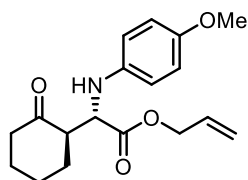

Allyl (S)-2-((4-methoxyphenyl)amino)-2-((R)-2-oxocyclohexyl)acetate (**3ea**)<sup>7</sup>

Yellow oil (49.5 mg, 78% yield); > 99:1  $dr$ . **<sup>1</sup>H NMR** (400 MHz, Chloroform- $d$ )  $\delta$  6.76 (d,  $J = 8.4$  Hz, 2H), 6.63 (d,  $J = 8.4$  Hz, 2H), 5.95–5.75 (m, 1H), 5.31–5.14 (m, 2H), 4.58 (d,  $J = 5.5$  Hz, 2H), 4.01 (d,  $J = 3.7$  Hz, 1H), 3.73 (s, 3H), 3.17–3.10 (m, 1H), 2.47–2.40 (m, 1H), 2.37–2.27 (m, 1H), 2.15–2.02 (m, 2H), 1.98–1.87 (m, 2H), 1.80–1.59 (m, 2H). **<sup>13</sup>C NMR** (100 MHz, Chloroform- $d$ )  $\delta$  211.02, 172.79, 152.78, 142.06, 131.77, 118.27, 115.55, 114.77, 65.75, 59.04, 55.69, 53.59, 41.81, 30.55, 26.83, 24.56.

**Optical Rotation:**  $[\alpha]_{25}^D = 22.4$  ( $c = 1.0$ ,  $\text{CH}_2\text{Cl}_2$ ). The  $ee$  value was determined by **HPLC analysis:** 98.0:2.0  $er$ , Chiralcel AD-H column, hexane/ $i$ -PrOH = 90/10, flow rate = 0.7 mL/min,  $\lambda = 254$  nm, retention time:  $t_{\text{major}} = 33.8$  min,  $t_{\text{minor}} = 27.3$  min.

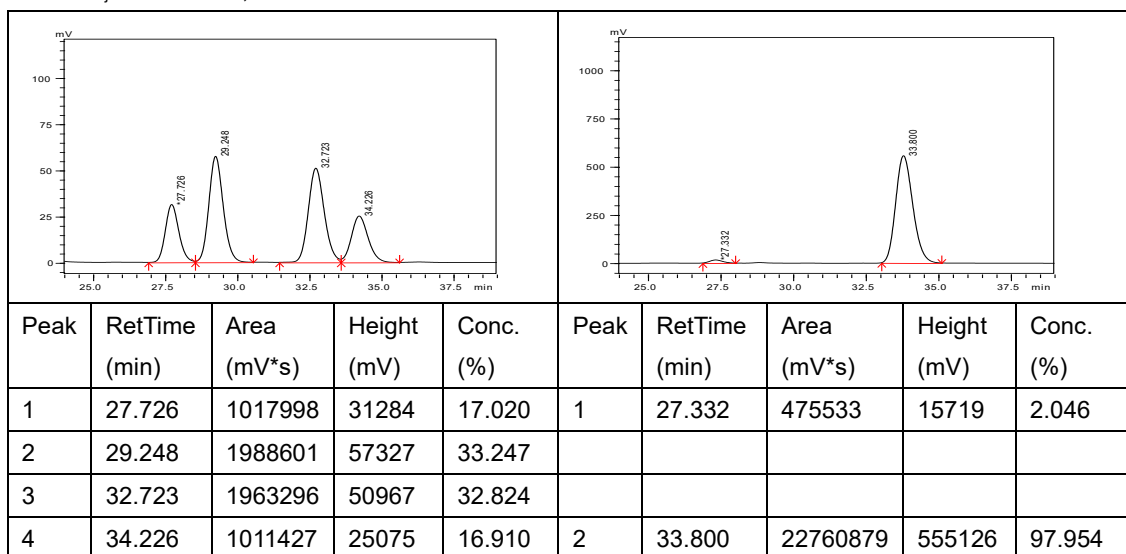

|       |  |         |        |         |       |  |          |        |         |
|-------|--|---------|--------|---------|-------|--|----------|--------|---------|
| Total |  | 5981322 | 164653 | 100.000 | Total |  | 23236412 | 570846 | 100.000 |
|-------|--|---------|--------|---------|-------|--|----------|--------|---------|

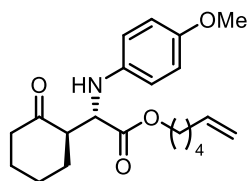

Allyl (S)-2-((4-methoxyphenyl)amino)-2-((R)-2-oxocyclohexyl)acetate (**3fa**)<sup>5</sup>

Yellow oil (53.2 mg, 74% yield); > 99:1 *dr*. **<sup>1</sup>H NMR** (400 MHz, Chloroform-*d*)  $\delta$  6.77 (d, *J* = 9.1 Hz, 2H), 6.73 (d, *J* = 9.1 Hz, 2H), 5.81–5.70 (m, 1H), 5.03–4.92 (m, 2H), 4.22 (d, *J* = 5.2 Hz, 1H), 4.15–4.04 (m, 2H), 3.74 (s, 3H), 2.90–2.76 (m, 1H), 2.51–2.41 (m, 1H), 2.37–2.27 (m, 1H), 2.26–2.16 (m, 1H), 2.12–1.93 (m, 4H), 1.86–1.76 (m, 1H), 1.74–1.64 (m, 2H), 1.64–1.53 (m, 2H), 1.42–1.32 (m, 2H). **<sup>13</sup>C NMR** (100 MHz, Chloroform-*d*)  $\delta$  210.05, 173.48, 153.11, 140.93, 138.28, 116.12, 114.79, 114.74, 65.04, 58.18, 55.66, 53.54, 41.83, 33.16, 29.66, 27.91, 26.85, 25.07, 24.78.

**Optical Rotation:**  $[\alpha]_D^{25} = 16.4$  (*c* = 1.0, CH<sub>2</sub>Cl<sub>2</sub>). The *ee* value was determined by **HPLC analysis:** 97.1:2.9 *er*, Chiralcel AD-H column, hexane/*i*-PrOH = 90/10, flow rate = 0.7 mL/min,  $\lambda$  = 254 nm, retention time: *t*<sub>major</sub> = 24.7 min, *t*<sub>minor</sub> = 20.0 min.

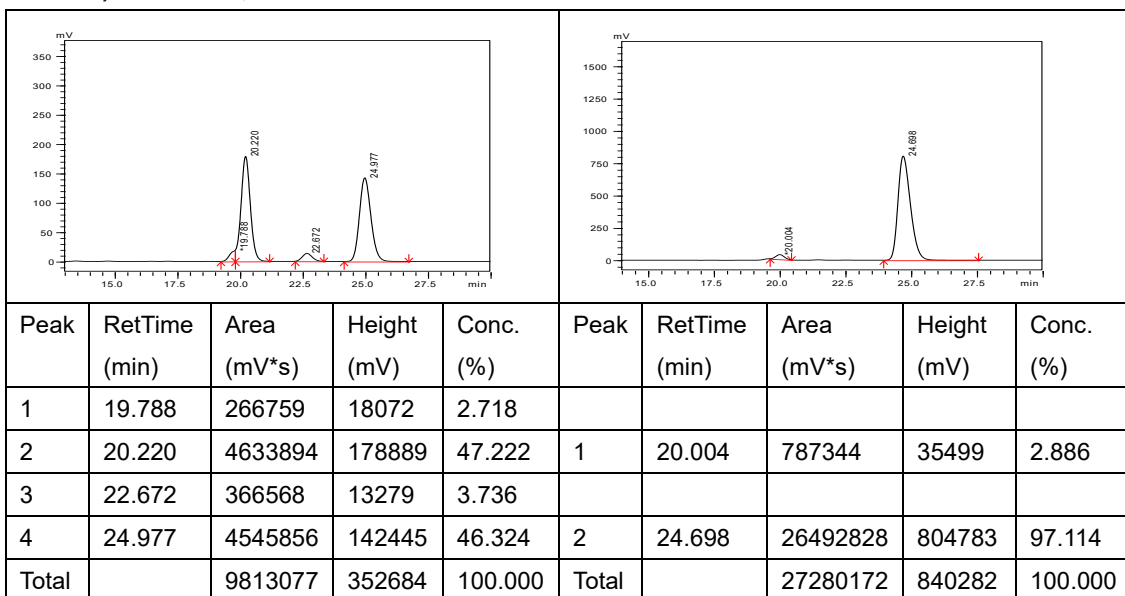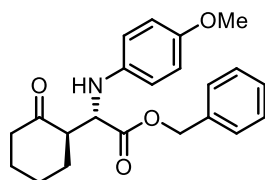

Benzyl (S)-2-((4-methoxyphenyl)amino)-2-((R)-2-oxocyclohexyl)acetate (**3ga**)<sup>7</sup>

Yellow oil (58 mg, 79% yield); > 99:1 *dr*. **<sup>1</sup>H NMR** (400 MHz, Chloroform-*d*)  $\delta$  7.40–7.29 (m, 3H), 7.25–7.20 (m, 2H), 6.75 (d, *J* = 8.9 Hz, 2H), 6.62 (d, *J* = 8.9 Hz, 2H), 5.20–5.08 (m, 2H), 4.06 (d, *J* = 4.0 Hz, 1H), 3.74 (s, 3H), 3.16–3.07 (m, 1H), 2.46–2.37 (m, 1H), 2.35–2.25 (m, 1H), 2.12–1.99 (m, 2H), 1.95–1.85 (m, 2H), 1.74–1.60 (m, 2H). **<sup>13</sup>C NMR** (100 MHz, Chloroform-*d*)  $\delta$  211.02, 172.96, 152.83, 142.03, 135.58, 128.44, 128.14, 128.01, 115.67, 114.78, 66.88, 59.05, 55.71, 53.52, 41.78, 30.51, 26.82, 24.51.

**Optical Rotation:**  $[\alpha]_{25}^D = 25.6$  ( $c = 1.0$ ,  $\text{CH}_2\text{Cl}_2$ ). The *ee* value was determined by **HPLC analysis:** 98.2:1.8 *er*, Chiralcel AD-H column, hexane/*i*-PrOH = 90/10, flow rate = 1.0 mL/min,  $\lambda = 214$  nm, retention time:  $t_{\text{major}} = 40.5$  min,  $t_{\text{minor}} = 28.3$  min.

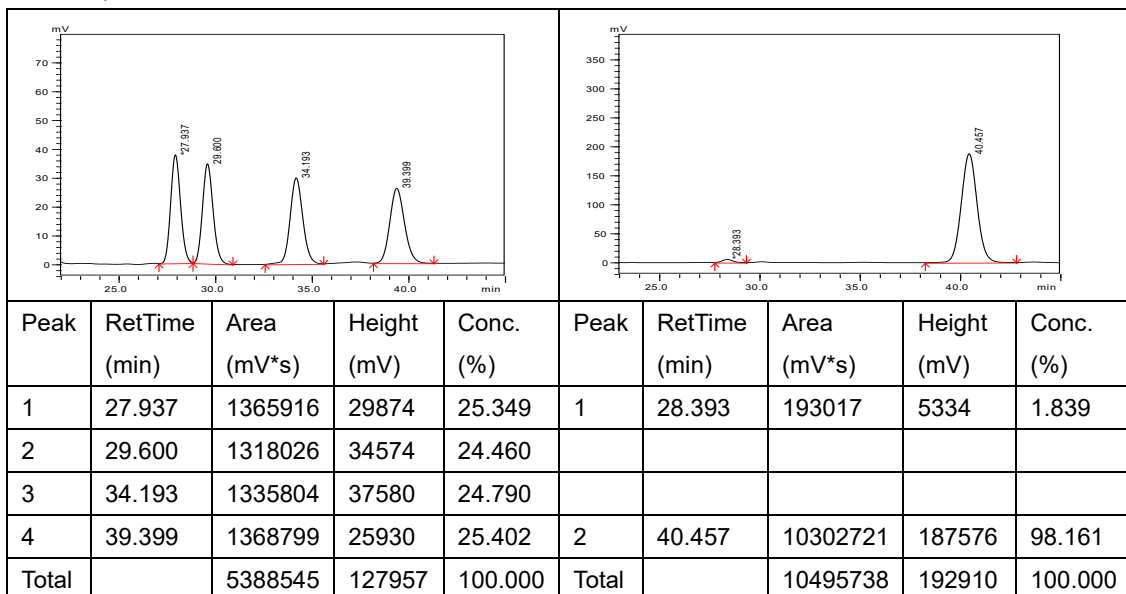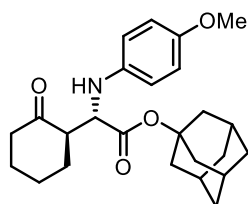

(1S,3R)-Adamantan-1-yl (2S)-2-((4-methoxyphenyl)amino)-2-((R)-2-oxocyclohexyl)acetate (**3ha**)<sup>8</sup>

White solid (60.9 mg, 74% yield); > 99:1 *dr*. m.p. = 122–123 °C. <sup>1</sup>H NMR (400 MHz, Chloroform-*d*)  $\delta$  6.75 (d,  $J = 8.8$  Hz, 2H), 6.62 (d,  $J = 8.8$  Hz, 2H), 3.93 (d,  $J = 4.4$  Hz, 1H), 3.73 (s, 3H), 3.07–2.96 (m, 1H), 2.47–2.39 (m, 1H), 2.35–2.24 (m, 1H), 2.14–1.99 (m, 11H), 1.96–1.85 (m, 2H), 1.74–1.59 (m, 8H). <sup>13</sup>C NMR (100 MHz, Chloroform-*d*)  $\delta$  210.83, 171.65, 152.63, 142.24, 115.57, 114.67, 81.61, 59.52, 55.67, 53.43, 41.69, 41.15, 36.04, 30.73, 30.26, 26.76, 24.40.

**Optical Rotation:**  $[\alpha]_{25}^D = 8.6$  ( $c = 1.0$ ,  $\text{CH}_2\text{Cl}_2$ ). The *ee* value was determined by **HPLC analysis:** 95.5:4.5 *er*, Chiralcel AD-H column, hexane/*i*-PrOH = 90/10, flow rate = 0.7 mL/min,  $\lambda = 254$  nm, retention time:  $t_{\text{major}} = 27.7$  min,  $t_{\text{minor}} = 31.3$  min.

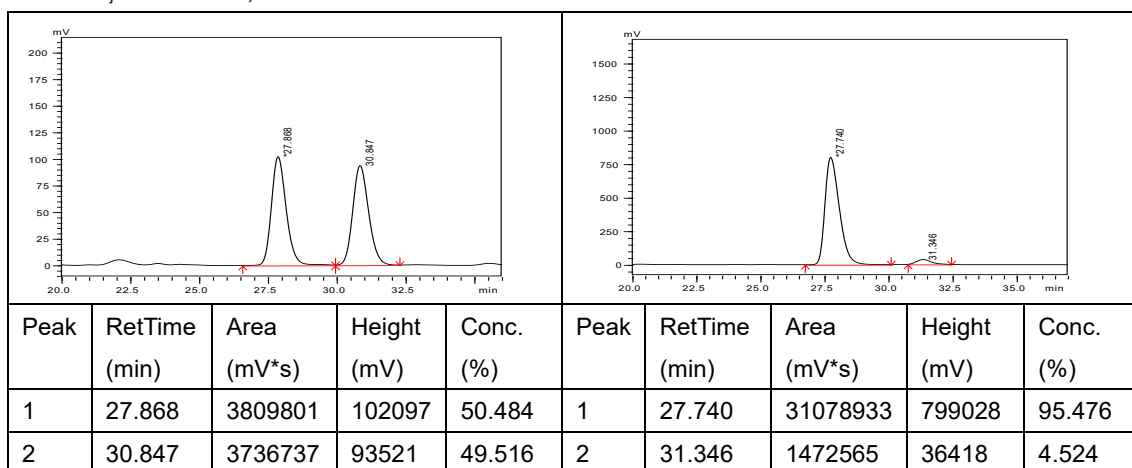

|       |  |         |        |         |       |  |          |        |         |
|-------|--|---------|--------|---------|-------|--|----------|--------|---------|
| Total |  | 7546538 | 195617 | 100.000 | Total |  | 32551498 | 835446 | 100.000 |
|-------|--|---------|--------|---------|-------|--|----------|--------|---------|

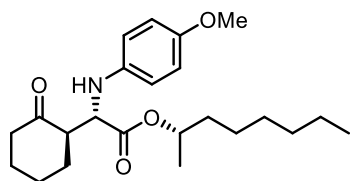

(S)-Octan-2-yl (S)-2-((4-methoxyphenyl)amino)-2-((R)-2-oxocyclohexyl)acetate (**3ia**)

Yellow oil (60 mg, 77% yield); 98:2 *dr*. **<sup>1</sup>H NMR** (400 MHz, Chloroform-*d*)  $\delta$  6.74 (d, *J* = 8.8 Hz, 2H), 6.62 (d, *J* = 8.8 Hz, 2H), 4.95–4.78 (m, 1H), 3.94 (d, *J* = 4.3 Hz, 1H), 3.72 (s, 3H), 3.18–3.00 (m, 1H), 2.49–2.37 (m, 1H), 2.35–2.26 (m, 1H), 2.14–2.00 (m, 2H), 1.99–1.88 (m, 2H), 1.79–1.65 (m, 2H), 1.51–1.35 (m, 2H), 1.27–1.06(m, 11H), 0.85 (t, *J* = 7.1 Hz, 3H). **<sup>13</sup>C NMR** (100 MHz, Chloroform-*d*)  $\delta$  210.80, 172.72, 152.79, 142.32, 115.63, 114.71, 72.19, 59.32, 55.65, 53.57, 41.75, 35.76, 31.66, 30.61, 29.00, 26.91, 25.05, 24.51, 22.49, 19.80, 13.98. **HRMS (ESI)** *m/z*: calcd for C<sub>23</sub>H<sub>36</sub>NO<sub>4</sub> [M+H]<sup>+</sup> 390.2644, found 390.2645.

**Optical Rotation:**  $[\alpha]^{25}_D = 17.5$  (*c* = 1.0, CH<sub>2</sub>Cl<sub>2</sub>). The *ee* value was determined by **HPLC analysis:** 98.2:1.8 *er*, Chiralcel AD-H column, hexane/*i*-PrOH = 90/10, flow rate = 0.7 mL/min,  $\lambda$  = 254 nm, retention time: *t*<sub>major</sub> = 20.4 min, *t*<sub>minor</sub> = 18.1 min.

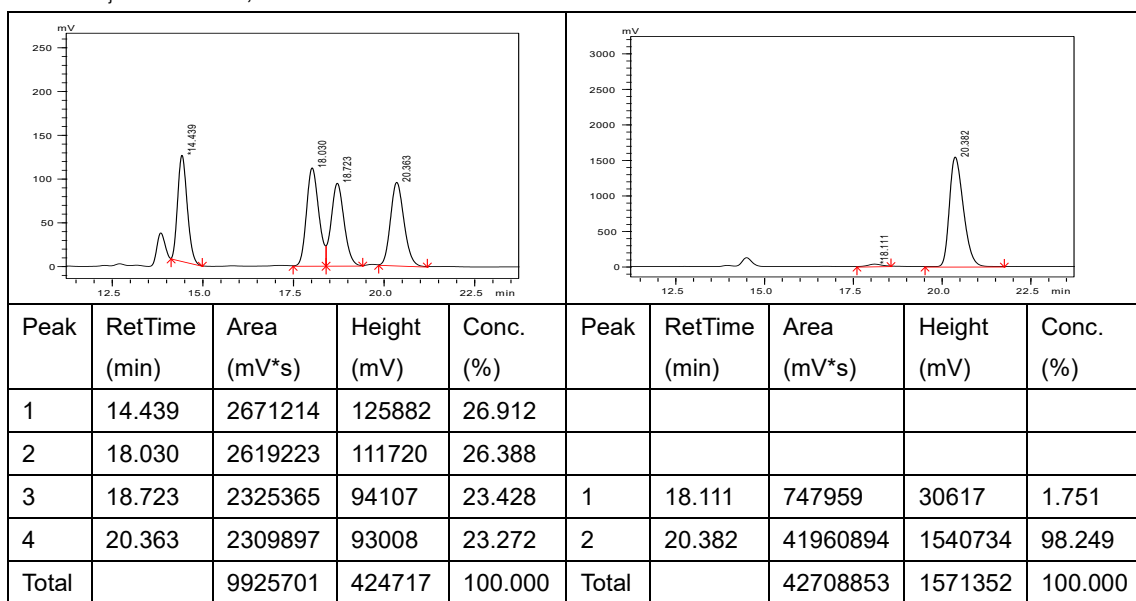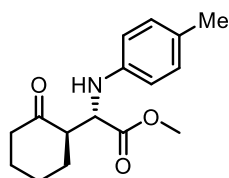

Methyl (S)-2-((R)-2-oxocyclohexyl)-2-(p-tolylamino)acetate (**3ja**)

Yellow oil (38.2 mg, 71% yield); > 99:1 *dr*. **<sup>1</sup>H NMR** (600 MHz, Chloroform-*d*)  $\delta$  6.98 (d, *J* = 8.4 Hz, 2H), 6.57 (d, *J* = 8.4 Hz, 2H), 4.09 (d, *J* = 3.8 Hz, 1H), 3.69 (s, 3H), 3.19–3.12 (m, 1H), 2.47–2.38 (m, 1H), 2.36–2.31 (m, 1H), 2.23 (s, 3H), 2.14–2.08 (m, 1H), 2.06–2.03 (m, 1H), 1.95–1.85 (m, 2H), 1.76–1.63 (m, 2H). **<sup>13</sup>C NMR** (150 MHz, Chloroform-*d*)  $\delta$  211.12, 173.48, 145.50, 129.79, 127.73, 113.95, 57.89, 53.67, 52.32, 41.84, 30.50, 26.84, 24.59, 20.36. **HRMS (ESI)** *m/z*: calcd for C<sub>16</sub>H<sub>22</sub>NO<sub>3</sub> [M+H]<sup>+</sup> 276.1594, found

276.1585.

**Optical Rotation:**  $[\alpha]_D^{25} = 14.7$  ( $c = 1.0$ ,  $\text{CH}_2\text{Cl}_2$ ). The *ee* value was determined by **HPLC analysis:** 99.7:0.3 *er*, Chiralcel AD-H column, hexane/*i*-PrOH = 98/2, flow rate = 1.0 mL/min,  $\lambda = 240$  nm, retention time:  $t_{\text{major}} = 39.8$  min,  $t_{\text{minor}} = 47.0$  min.

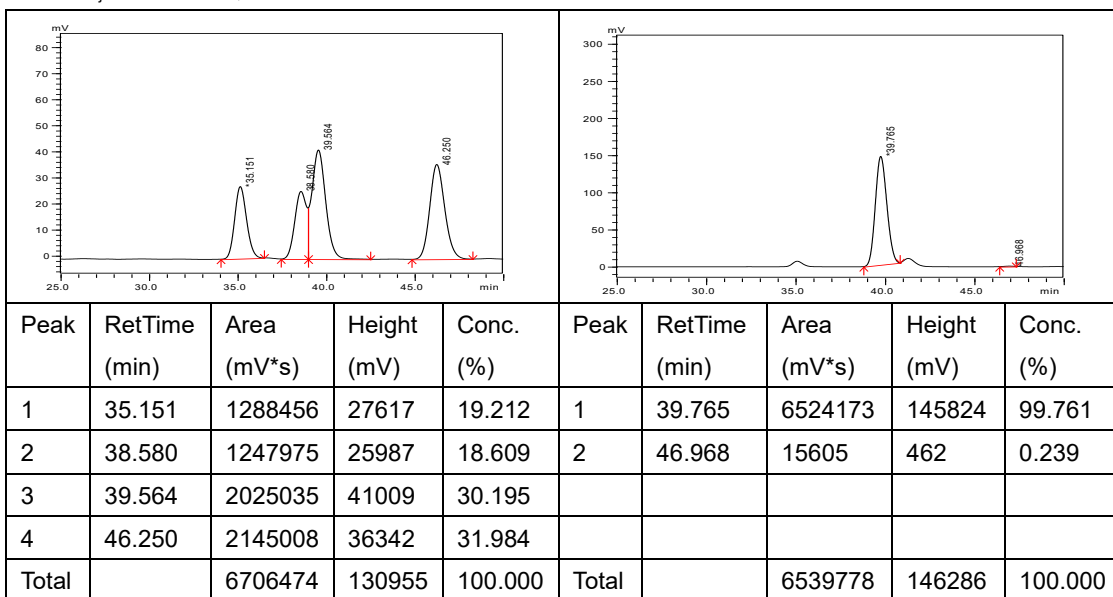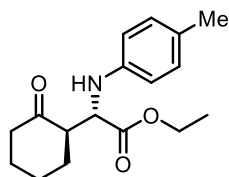

Ethyl (S)-2-((R)-2-oxocyclohexyl)-2-(p-tolylamino)acetate (**3ka**)<sup>7</sup>

Yellow oil (39 mg, 66% yield); 98:2 *dr*. **<sup>1</sup>H NMR** (400 MHz, Chloroform-*d*)  $\delta$  6.97 (d,  $J = 7.8$  Hz, 2H), 6.57 (d,  $J = 7.8$  Hz, 2H), 4.23–4.05 (m, 3H), 3.21–3.05 (m, 1H), 2.48–2.37 (m, 1H), 2.32 (m, 1H), 2.22 (s, 3H), 2.16–2.00 (m, 2H), 1.97–1.81 (m, 2H), 1.80–1.61 (m, 2H), 1.25–1.17 (m, 3H). **<sup>13</sup>C NMR** (100 MHz, Chloroform-*d*)  $\delta$  211.03, 172.90, 145.66, 129.71, 127.56, 113.97, 61.21, 57.95, 53.58, 41.78, 30.41, 26.79, 24.51, 20.34, 14.09.

**Optical Rotation:**  $[\alpha]_D^{25} = 18.0$  ( $c = 1.0$ ,  $\text{CH}_2\text{Cl}_2$ ). The *ee* value was determined by **HPLC analysis:** 97.3:2.7 *er*, Chiralcel AD-H column, hexane/*i*-PrOH = 96/4, flow rate = 1.0 mL/min,  $\lambda = 254$  nm, retention time:  $t_{\text{major}} = 20.6$  min,  $t_{\text{minor}} = 23.3$  min.

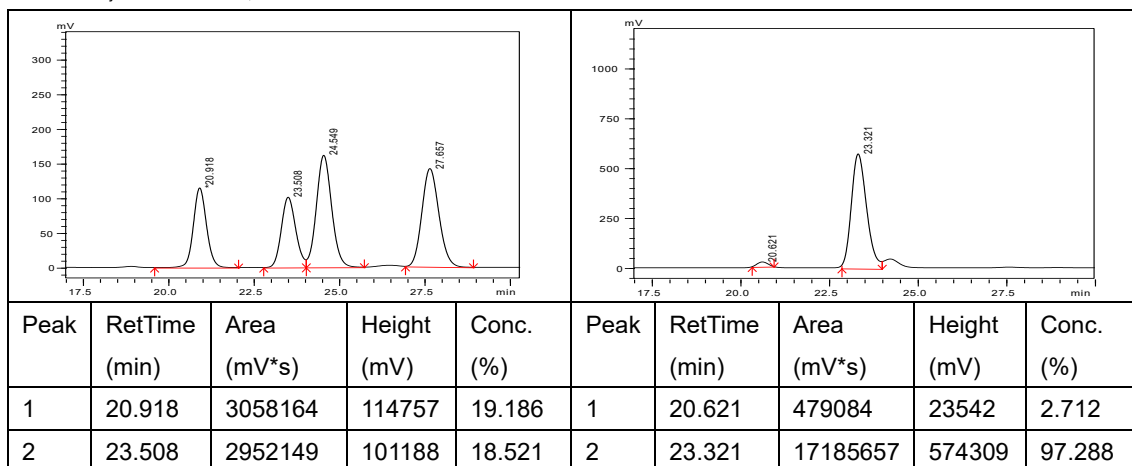

|       |        |          |        |         |       |  |          |        |         |
|-------|--------|----------|--------|---------|-------|--|----------|--------|---------|
| 3     | 24.549 | 5036013  | 161456 | 31.594  |       |  |          |        |         |
| 4     | 27.657 | 4893371  | 141462 | 30.699  |       |  |          |        |         |
| Total |        | 15939697 | 518863 | 100.000 | Total |  | 17664742 | 597851 | 100.000 |

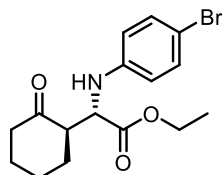

Ethyl (S)-2-((4-bromophenyl)amino)-2-((R)-2-oxocyclohexyl)acetate (**31a**)<sup>7</sup>

Yellow oil (41.1 mg, 58% yield); 80:20 *dr*. <sup>1</sup>H NMR (400 MHz, Chloroform-*d*) δ 7.24 (d, *J* = 8.8 Hz, 2H), 6.60 (d, *J* = 8.8 Hz, 2H), 4.23 (d, *J* = 5.0 Hz, 1H), 4.13 (m, 2H), 3.19–2.77 (m, 1H), 2.52–2.36 (m, 1H), 2.36–2.04 (m, 3H), 1.95 (m, 1H), 1.89–1.54 (m, 3H), 1.26–1.22 (m, 3H). <sup>13</sup>C NMR (100 MHz, Chloroform-*d*) δ 209.90, 172.72, 145.97, 131.92, 115.63, 110.22, 61.33, 56.56, 53.35, 41.77, 29.77, 26.80, 24.77, 14.08.

**Optical Rotation:**  $[\alpha]_{25}^D = 30.0$  (*c* = 1.0, CH<sub>2</sub>Cl<sub>2</sub>). The *ee* value was determined by **HPLC analysis:** 95.6:4.4 *er*, Chiralcel AD-H column, hexane/*i*-PrOH = 90/10, flow rate = 1.0 mL/min, λ = 254 nm, retention time: *t*<sub>major</sub> = 20.9 min, *t*<sub>minor</sub> = 16.3 min.

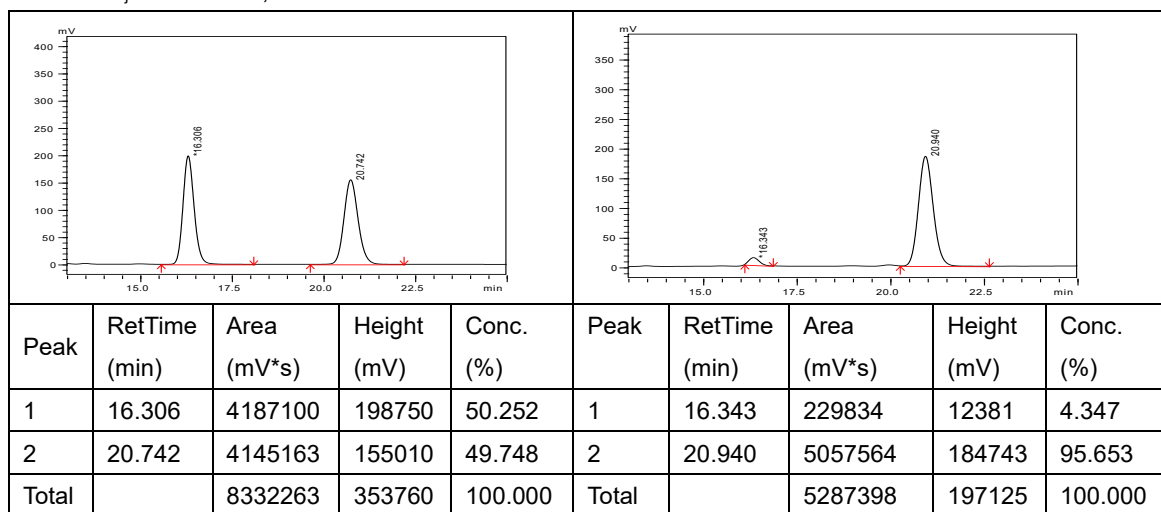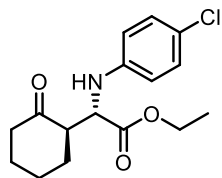

Ethyl (S)-2-((4-chlorophenyl)amino)-2-((R)-2-oxocyclohexyl)acetate (**3ma**)<sup>7</sup>

Yellow oil (37.2 mg, 60% yield); 99:1 *dr*. <sup>1</sup>H NMR (400 MHz, Chloroform-*d*) δ 7.12 (d, *J* = 8.8 Hz, 2H), 6.66 (d, *J* = 8.8 Hz, 2H), 4.24 (d, *J* = 4.9 Hz, 1H), 4.19–4.11 (m, 2H), 2.91–2.74 (m, 1H), 2.53–2.41 (m, 1H), 2.36–2.26 (m, 1H), 2.23–2.15 (m, 1H), 2.12–2.04 (m, 1H), 2.00–1.91 (m, 1H), 1.86–1.76 (m, 1H), 1.73–1.61 (m, 2H), 1.23 (t, *J* = 7.1 Hz, 3H). <sup>13</sup>C NMR (100 MHz, Chloroform-*d*) δ 209.92, 172.85, 145.60, 129.12, 123.27, 115.30, 61.39, 56.80, 53.45, 41.85, 29.80, 26.85, 24.84, 14.15.

**Optical Rotation:**  $[\alpha]_{25}^D = 42.5$  (*c* = 1.0, CH<sub>2</sub>Cl<sub>2</sub>). The *ee* value was determined by **HPLC analysis:** 93.0:7.0 *er*, Chiralcel AD-H column, hexane/*i*-PrOH = 90/10, flow rate = 1.0 mL/min, λ = 254 nm, retention



time:  $t_{\text{major}} = 21.9 \text{ min}$ ,  $t_{\text{minor}} = 15.7 \text{ min}$ .

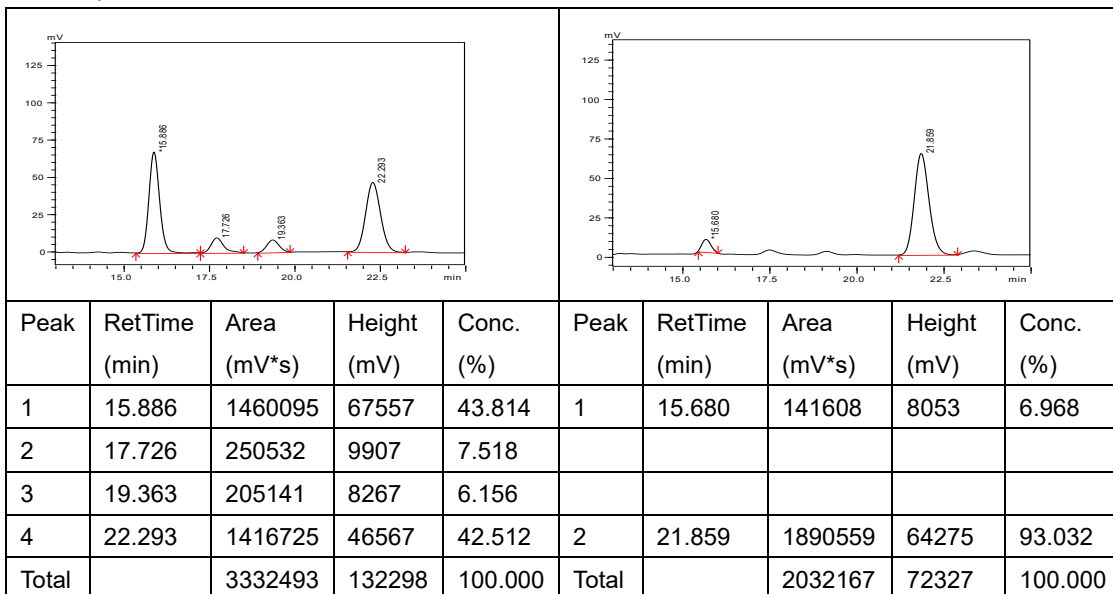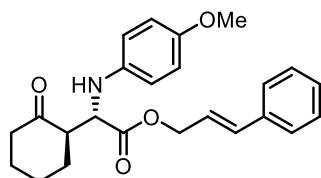

Cinnamyl (S)-2-((4-methoxyphenyl)amino)-2-((R)-2-oxocyclohexyl)acetate (**3na**)

Brown oil (52 mg, 69% yield); 99:1 *dr*.  $^1\text{H NMR}$  (400 MHz, Chloroform-*d*)  $\delta$  7.38–7.31 (m, 4H), 7.30–7.26 (m, 1H), 6.79 (d,  $J = 8.9 \text{ Hz}$ , 2H), 6.68 (d,  $J = 8.9 \text{ Hz}$ , 2H), 6.56 (d,  $J = 15.9 \text{ Hz}$ , 1H), 6.28–6.16 (m, 1H), 4.77 (m, 2H), 4.06 (d,  $J = 4.1 \text{ Hz}$ , 1H), 3.75 (s, 3H), 3.23–3.13 (m, 1H), 2.51–2.42 (m, 1H), 2.40–2.32 (m, 1H), 2.20–2.04 (m, 2H), 2.03–1.91 (m, 2H), 1.82–1.65 (m, 2H).  $^{13}\text{C NMR}$  (100 MHz, Chloroform-*d*)  $\delta$  211.07, 172.91, 152.78, 142.06, 133.88, 128.53, 127.98, 126.56, 122.75, 115.59, 114.78, 65.58, 59.07, 55.65, 53.58, 41.83, 30.59, 26.85, 24.54. **HRMS (ESI)**  $m/z$ : calcd for  $\text{C}_{24}\text{H}_{28}\text{NO}_4$   $[\text{M}+\text{H}]^+$  394.2013, found 394.2005.

**Optical Rotation:**  $[\alpha]_{\text{D}}^{25} = 22.3$  ( $c = 1.0$ ,  $\text{CH}_2\text{Cl}_2$ ). The *ee* value was determined by **HPLC analysis**: 95.1:4.9 *er*, Chiralcel AD-H column, hexane/*i*-PrOH = 90/10, flow rate = 1.0 mL/min,  $\lambda = 254 \text{ nm}$ , retention time:  $t_{\text{major}} = 36.9 \text{ min}$ ,  $t_{\text{minor}} = 27.4 \text{ min}$ .

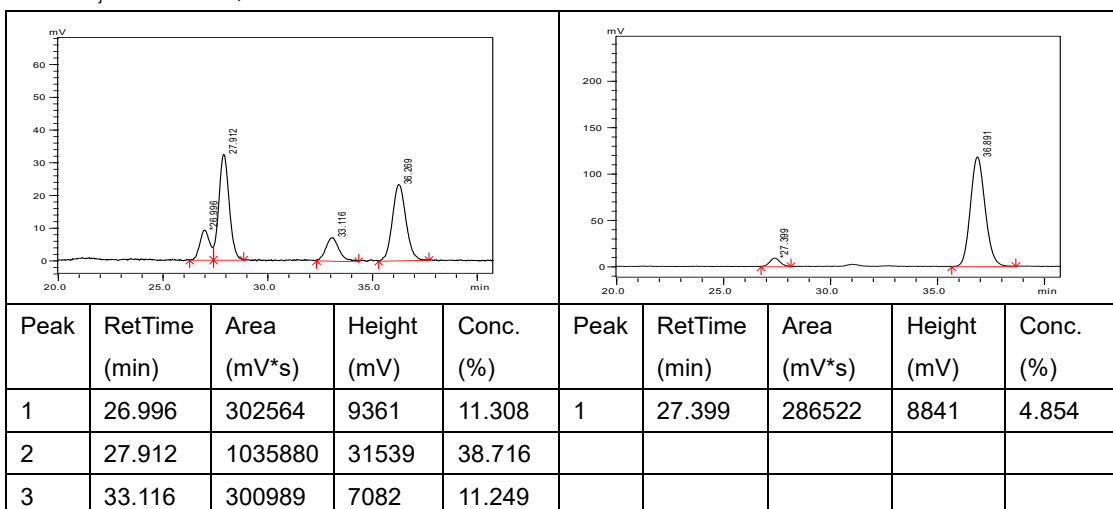

|       |        |         |       |         |       |        |         |        |         |
|-------|--------|---------|-------|---------|-------|--------|---------|--------|---------|
| 4     | 36.269 | 1036173 | 23235 | 38.727  | 2     | 36.891 | 5616542 | 117881 | 95.146  |
| Total |        | 2675606 | 71218 | 100.000 | Total |        | 5903064 | 126722 | 100.000 |

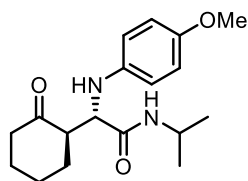

(S)-N-isopropyl-2-((4-methoxyphenyl)amino)-2-((R)-2-oxocyclohexyl)acetamide (**30a**)

White solid (44.9 mg, 70% yield); 95:5 *dr*. m.p. = 118–120 °C. <sup>1</sup>H NMR (400 MHz, Chloroform-*d*) δ 6.84 (dd, *J* = 12.7, 8.5 Hz, 1H), 6.76 (d, *J* = 8.9 Hz, 2H), 6.55 (d, *J* = 8.9 Hz, 2H), 4.09–3.97 (m, 1H), 3.92 (d, *J* = 3.0 Hz, 1H), 3.73 (s, 3H), 3.36–3.20 (m, 1H), 2.38 (m, 2H), 2.10–2.01 (m, 2H), 1.90–1.82 (m, 1H), 1.71–1.50 (m, 3H), 1.13 (d, *J* = 6.6 Hz, 3H), 1.08 (d, *J* = 6.6 Hz, 3H). <sup>13</sup>C NMR (100 MHz, Chloroform-*d*) δ 213.61, 170.97, 152.53, 141.14, 114.98, 114.46, 58.92, 55.68, 53.22, 42.34, 41.22, 31.08, 27.62, 24.91, 22.57, 22.55. HRMS (ESI) *m/z*: calcd for C<sub>18</sub>H<sub>26</sub>N<sub>2</sub>NaO<sub>3</sub> [M+Na]<sup>+</sup> 341.1836, found 314.1835.

**Optical Rotation:** [α]<sub>D</sub><sup>25</sup> = 36.5 (c = 1.0, CH<sub>2</sub>Cl<sub>2</sub>). The *ee* value was determined by **HPLC analysis:** 95.3:4.7 *er*, Chiralcel AD-H column, hexane/*i*-PrOH = 90/10, flow rate = 1.0 mL/min, λ = 254 nm, retention time: *t*<sub>major</sub> = 19.3 min, *t*<sub>minor</sub> = 15.1 min.

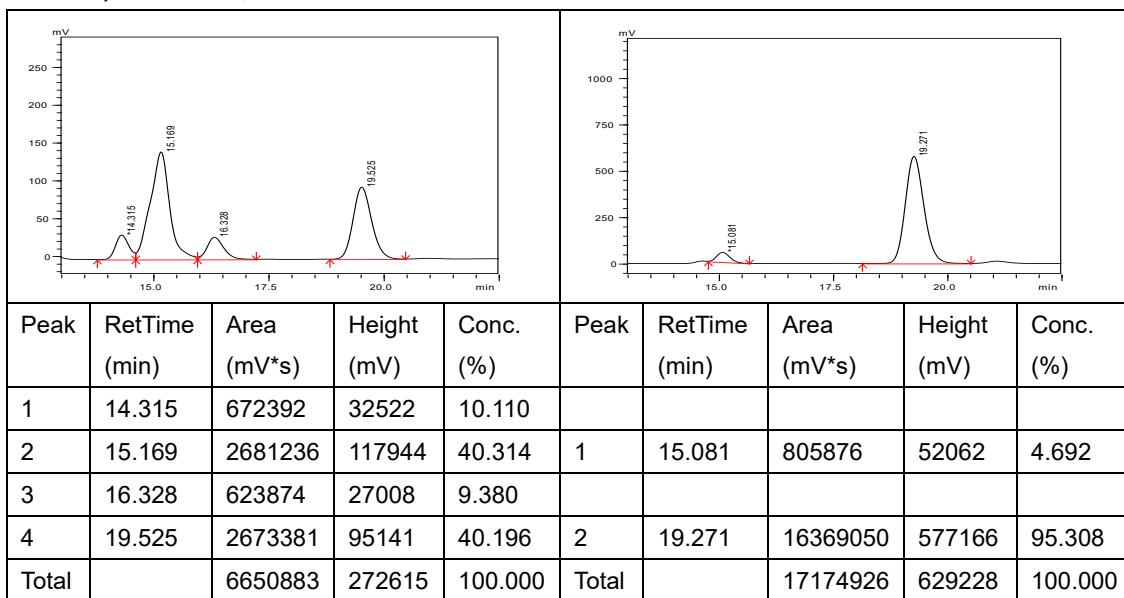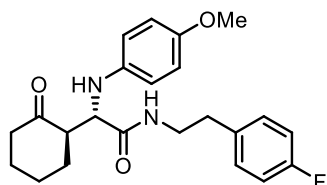

(S)-N-(4-fluorophenethyl)-2-((4-methoxyphenyl)amino)-2-((R)-2-oxocyclohexyl)acetamide (**3pa**)

White solid (55 mg, 69% yield); >99:1 *dr*. m.p. = 146–147 °C. <sup>1</sup>H NMR (400 MHz, Chloroform-*d*) δ 7.09 (dd, *J* = 8.5, 5.5 Hz, 2H), 7.07–6.97 (m, 1H), 6.93 (t, *J* = 8.7 Hz, 2H), 6.75 (d, *J* = 8.9 Hz, 2H), 6.50 (d, *J* = 8.9 Hz, 2H), 3.87 (d, *J* = 2.9 Hz, 1H), 3.74 (s, 3H), 3.47 (q, *J* = 6.7 Hz, 2H), 3.38–3.26 (m, 1H), 2.74 (t, *J* = 6.9 Hz, 2H), 2.45–2.31 (m, 2H), 2.11–1.97 (m, 2H), 1.90–1.81 (m, 1H), 1.72–1.52 (m, 3H). <sup>13</sup>C NMR (100 MHz, Chloroform-*d*) δ 213.42, 172.10, 161.52 (d, *J*<sub>1</sub> = 243 Hz, C<sub>q</sub>), 152.70, 140.92, 134.47 (d, *J*<sub>4</sub> = 3 Hz,

Cq), 134.44, 130.21 (d,  $J_3 = 7$  Hz, CH), 130.13, 115.22 (d,  $J_2 = 21$  Hz, CH), 115.03, 114.40, 59.28, 55.69, 53.13, 42.34, 40.51, 34.87, 31.28, 27.59, 24.90.  $^{19}\text{F}$  NMR (376 MHz, Chloroform-*d*)  $\delta$  -116.85. HRMS (ESI)  $m/z$ : calcd for  $\text{C}_{23}\text{H}_{27}\text{FN}_2\text{NaO}_3$   $[\text{M}+\text{Na}]^+$  421.1903, found 421.1912.

**Optical Rotation:**  $[\alpha]^{25}_{\text{D}} = 42$  ( $c = 1.0$ ,  $\text{CH}_2\text{Cl}_2$ ). The *ee* value was determined by HPLC analysis: 95.0:5.0 *er*, Chiralcel AD-H column, hexane/*i*-PrOH = 90/10, flow rate = 1.0 mL/min,  $\lambda = 254$  nm, retention time:  $t_{\text{major}} = 61.1$  min,  $t_{\text{minor}} = 28.8$  min.

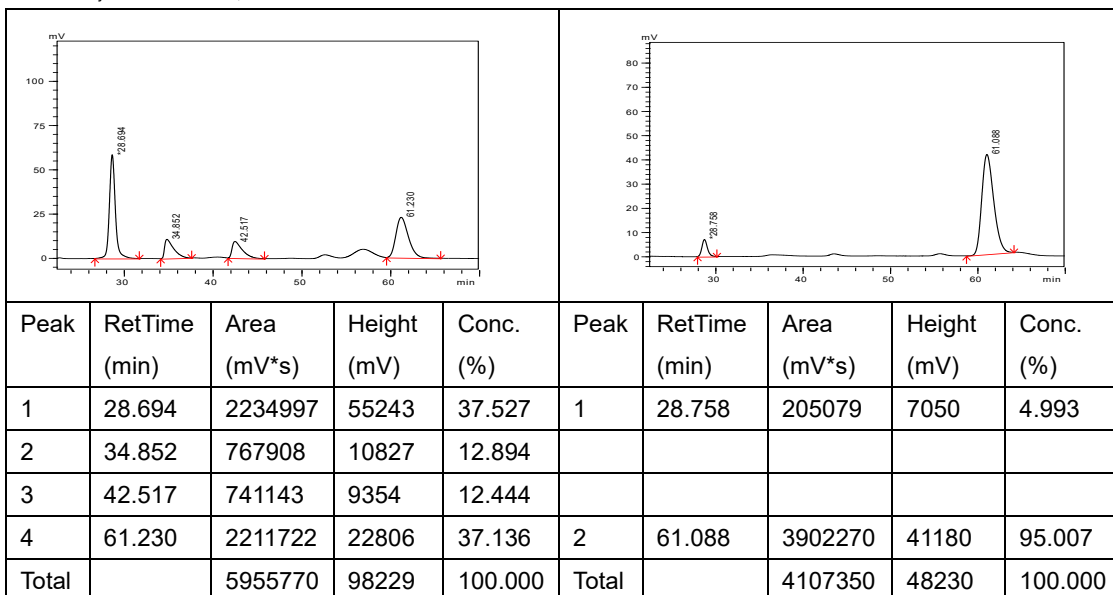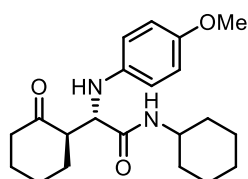

(*S*)-*N*-cyclohexyl-2-((4-methoxyphenyl)amino)-2-((*R*)-2-oxocyclohexyl)acetamide (**3qa**)

Yellow oil (53.8 mg, 75% yield); 99:1 *dr*.  $^1\text{H}$  NMR (400 MHz, Chloroform-*d*)  $\delta$  6.89 (s, 1H), 6.77 (d,  $J = 8.3$  Hz, 2H), 6.58 (d,  $J = 8.3$  Hz, 2H), 3.97 (s, 1H), 3.74 (s, 4H), 3.30 (m, 1H), 2.39 (m, 2H), 2.13–2.04 (m, 2H), 1.89–1.55 (m, 9H), 1.39–1.27 (m, 2H), 1.24–1.07 (m, 3H).  $^{13}\text{C}$  NMR (100 MHz, Chloroform-*d*)  $\delta$  213.68, 170.71, 152.67, 141.01, 115.04, 114.62, 58.92, 55.74, 53.25, 47.98, 42.37, 32.83, 30.98, 27.66, 26.51, 25.49, 24.94, 24.65. HRMS (ESI)  $m/z$ : calcd for  $\text{C}_{21}\text{H}_{30}\text{N}_2\text{NaO}_3$   $[\text{M}+\text{Na}]^+$  381.2149, found 381.2142.

**Optical Rotation:**  $[\alpha]^{25}_{\text{D}} = 22.9$  ( $c = 1.0$ ,  $\text{CH}_2\text{Cl}_2$ ). The *ee* value was determined by HPLC analysis: 97.2:2.8 *er*, Chiralcel AD-H column, hexane/*i*-PrOH = 90/10, flow rate = 0.7 mL/min,  $\lambda = 254$  nm, retention time:  $t_{\text{major}} = 19.0$  min,  $t_{\text{minor}} = 17.4$  min.

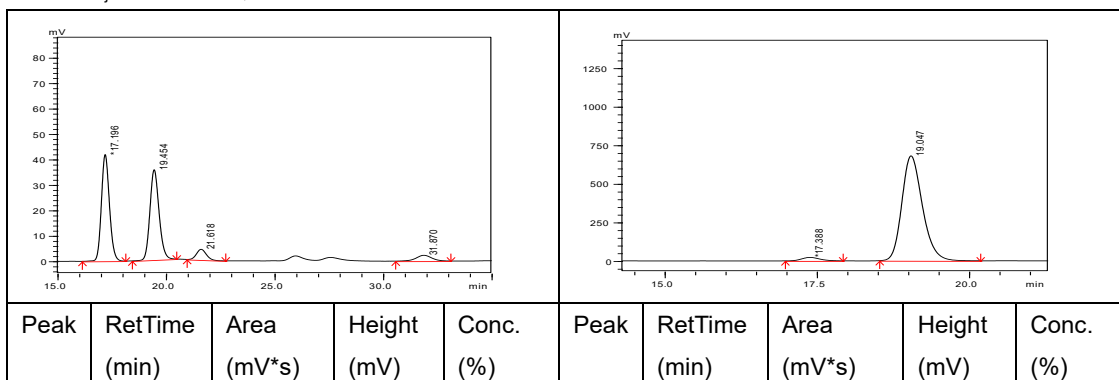

|       |        |         |       |         |       |        |          |        |         |
|-------|--------|---------|-------|---------|-------|--------|----------|--------|---------|
| 1     | 17.196 | 1078515 | 41896 | 45.667  | 1     | 17.388 | 460063   | 22238  | 2.802   |
| 2     | 19.454 | 1039284 | 35459 | 44.006  | 2     | 19.047 | 15956562 | 679586 | 97.198  |
| 3     | 21.618 | 130158  | 4175  | 5.511   |       |        |          |        |         |
| 4     | 31.870 | 113733  | 2270  | 4.816   |       |        |          |        |         |
| Total |        | 2361690 | 83800 | 100.000 | Total |        | 16416625 | 701824 | 100.000 |

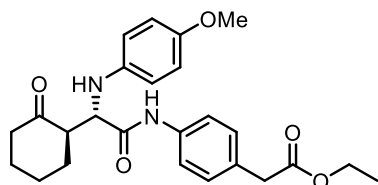

Ethyl 2-(4-((S)-2-((R)-2-oxocyclohexyl)acetamido)phenyl)-acetate (**3ra**)

Brown oil (61.3 mg, 70% yield); 96:4 dr. **<sup>1</sup>H NMR** (400 MHz, Chloroform-*d*)  $\delta$  7.36–7.27 (m, 4H), 6.77 (d, *J* = 8.9 Hz, 2H), 6.64 (d, *J* = 8.9 Hz, 2H), 4.20–4.09 (m, 3H), 3.74 (s, 3H), 3.63–3.59 (m, 2H), 2.83–2.58 (m, 1H), 2.42–2.17 (m, 1H), 2.16–1.91 (m, 3H), 1.75–1.46 (m, 4H), 1.28–1.25 (m, 3H). **<sup>13</sup>C NMR** (100 MHz, Chloroform-*d*)  $\delta$  213.48, 175.06, 171.40, 152.31, 141.67, 133.91, 133.60, 130.01, 127.51, 114.88, 114.04, 90.08, 61.01, 57.91, 55.74, 46.97, 40.89, 33.51, 24.70, 23.24, 22.17, 14.12. **HRMS (ESI)** *m/z*: calcd for C<sub>25</sub>H<sub>31</sub>N<sub>2</sub>O<sub>5</sub> [M+H]<sup>+</sup> 439.2233, found 439.2231.

**Optical Rotation:**  $[\alpha]_D^{25} = 15.4$  (*c* = 1.0, CH<sub>2</sub>Cl<sub>2</sub>). The *ee* value was determined by **HPLC analysis**: 96.5:3.5 *er*, Chiralcel AD-H column, hexane/*i*-PrOH = 95/5, flow rate = 0.7 mL/min,  $\lambda$  = 240 nm, retention time: *t*<sub>major</sub> = 21.7 min, *t*<sub>minor</sub> = 23.4 min.

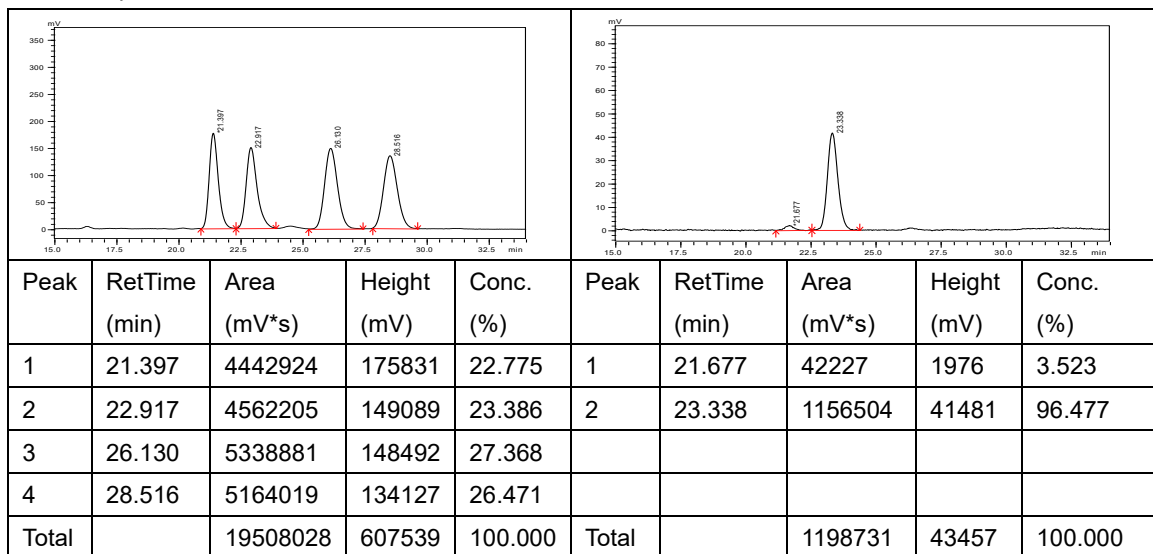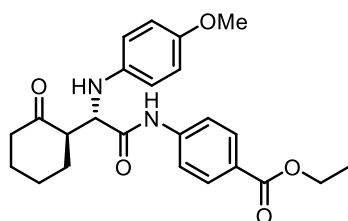

Ethyl 4-((S)-2-((R)-2-oxocyclohexyl)acetamido)benzoate (**3sa**)

Brown oil (57.7 mg, 68% yield); 99:1 *dr*. **<sup>1</sup>H NMR** (400 MHz, Chloroform-*d*)  $\delta$  8.03 (d, *J* = 8.5 Hz, 2H), 7.43 (d, *J* = 8.6 Hz, 2H), 6.76 (d, *J* = 9.1 Hz, 2H), 6.62 (d, *J* = 8.9 Hz, 2H), 4.64 (d, *J* = 5.9 Hz, 1H),

4.40–4.33 (m, 2H), 3.73 (s, 3H), 2.83–2.62 (m, 1H), 2.17–2.08 (m, 1H), 1.78–1.60 (m, 2H), 1.59–1.41 (m, 2H), 1.39 (t,  $J = 7.1$  Hz, 3H), 1.28–1.12 (m, 1H), 1.12–0.96 (m, 1H), 0.96–0.73 (m, 1H).  $^{13}\text{C}$  NMR (100 MHz, Chloroform- $d$ )  $\delta$  213.67, 174.86, 166.03, 152.41, 141.38, 139.32, 130.68, 130.28, 126.62, 118.85, 114.90, 114.09, 90.26, 61.16, 57.92, 55.72, 47.15, 42.26, 33.32, 24.76, 23.19, 21.96, 14.26. **HRMS (ESI)**  $m/z$ : calcd for  $\text{C}_{24}\text{H}_{29}\text{N}_2\text{O}_5$   $[\text{M}+\text{H}]^+$  425.2076, found 425.2056.

**Optical Rotation:**  $[\alpha]^{25}_{\text{D}} = 16.3$  ( $c = 1.0$ ,  $\text{CH}_2\text{Cl}_2$ ). The  $ee$  value was determined by **HPLC analysis:** 94.0:6.0  $er$ , Chiralcel AD-H column, hexane/ $i$ -PrOH = 90/10, flow rate = 0.7 mL/min,  $\lambda = 240$  nm, retention time:  $t_{\text{major}} = 89.4$  min,  $t_{\text{minor}} = 42.1$  min.

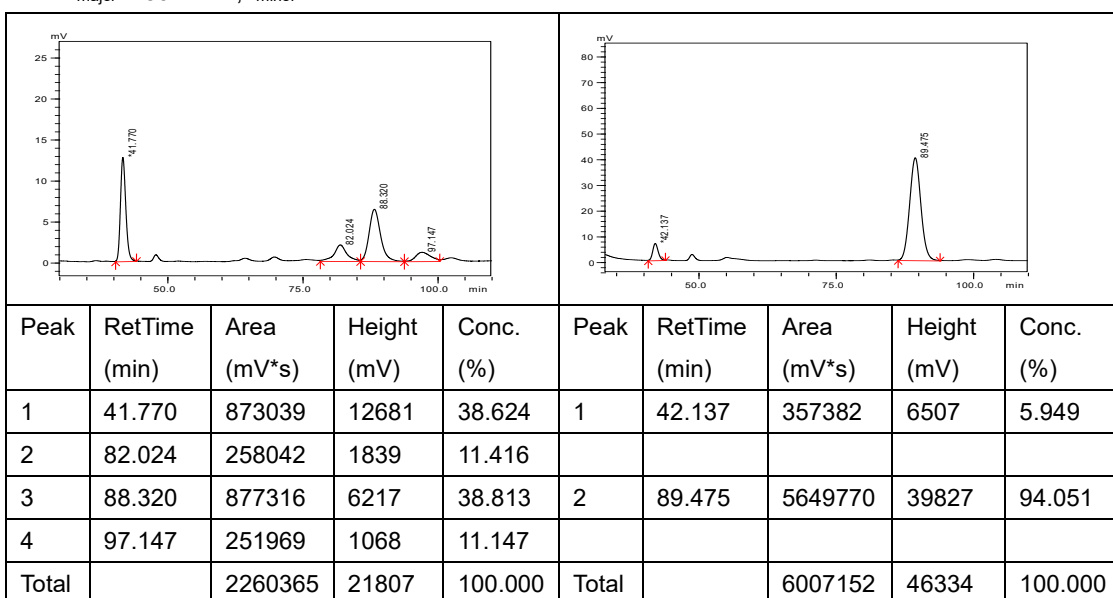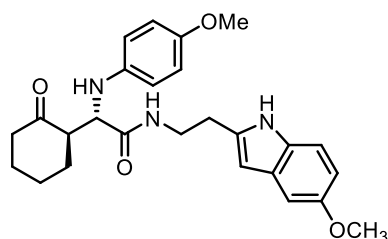

(*S*)-*N*-(2-(5-methoxy-1H-indol-2-yl)ethyl)-2-((4-methoxyphenyl)amino)-2-((*R*)-2-oxocyclohexyl)acetamide (**3ta**)

Brown oil (67.4mg, 75% yield); 85:15  $dr$ .  $^1\text{H}$  NMR (400 MHz, Chloroform- $d$ )  $\delta$  8.05 (s, 1H), 7.22 (d,  $J = 8.8$  Hz, 1H), 7.09 (t,  $J = 5.8$  Hz, 1H), 7.03 (d,  $J = 2.5$  Hz, 1H), 6.89 (d,  $J = 2.4$  Hz, 1H), 6.84 (m, 1H), 6.72 (d,  $J = 8.9$  Hz, 2H), 6.47 (d,  $J = 8.9$  Hz, 2H), 3.89 (d,  $J = 3.2$  Hz, 1H), 3.85 (s, 3H), 3.73 (s, 3H), 3.56 (m, 2H), 3.36–3.06 (m, 1H), 2.89 (t,  $J = 6.8$  Hz, 2H), 2.51–2.24 (m, 2H), 2.09–1.96 (m, 2H), 1.88–1.78 (m, 1H), 1.73–1.48 (m, 3H).  $^{13}\text{C}$  NMR (100 MHz, Chloroform- $d$ )  $\delta$  213.46, 172.15, 153.89, 152.47, 141.10, 131.40, 127.61, 122.97, 114.96, 114.34, 112.39, 112.20, 111.85, 100.35, 59.16, 55.87, 55.69, 53.08, 42.29, 39.40, 31.21, 27.50, 25.18, 24.86. **HRMS (ESI)**  $m/z$ : calcd for  $\text{C}_{26}\text{H}_{32}\text{N}_3\text{O}_4$   $[\text{M}+\text{H}]^+$  450.2393, found 450.2380.

**Optical Rotation:**  $[\alpha]^{25}_{\text{D}} = 63.5$  ( $c = 1.0$ ,  $\text{CH}_2\text{Cl}_2$ ). The  $ee$  value was determined by **HPLC analysis:** 95.7:4.3  $er$ , Chiralcel AD-H column, hexane/ $i$ -PrOH = 98/2, flow rate = 1.0 mL/min,  $\lambda = 240$  nm, retention time:  $t_{\text{major}} = 74$  min,  $t_{\text{minor}} = 56.3$  min.

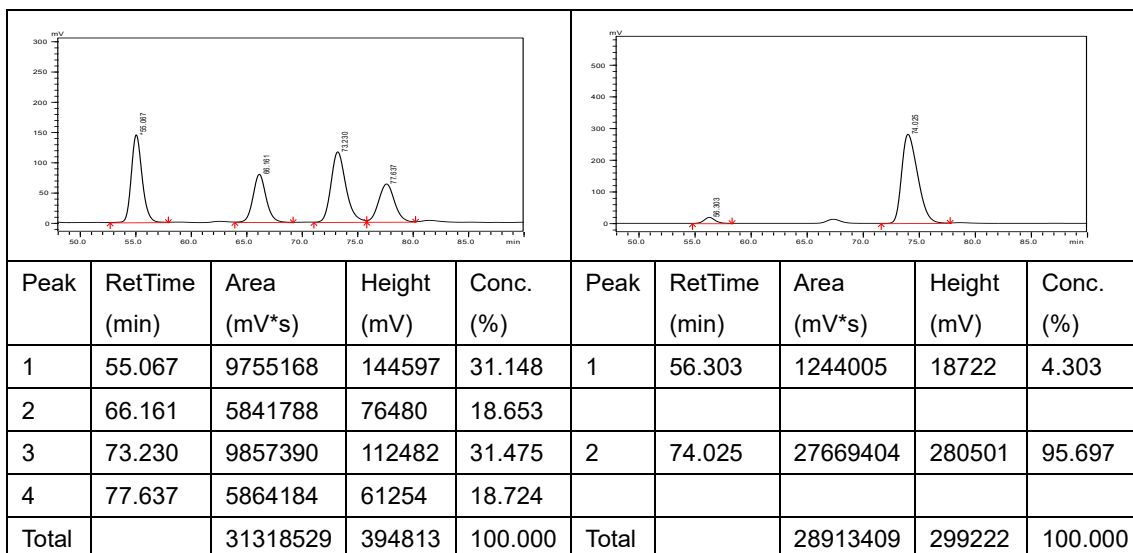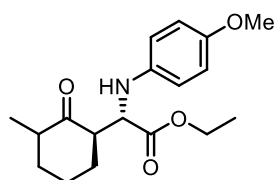

Ethyl (2S)-2-((4-methoxyphenyl)amino)-2-((1R)-3-methyl-2-oxocyclohexyl)acetate (**3ab**)

Yellow oil (42.2 mg, 66% yield); 97:3 *dr*. **<sup>1</sup>H NMR** (400 MHz, DMSO-*d*<sub>6</sub>) δ 6.71 (d, *J* = 9.0 Hz, 2H), 6.61 (d, *J* = 9.0 Hz, 2H), 5.48 (d, *J* = 10.1 Hz, 1H), 4.34–4.24 (m, 1H), 3.96 (q, *J* = 7.1 Hz, 2H), 3.63 (s, 3H), 2.81–2.66 (m, 2H), 2.07–1.92 (m, 2H), 1.82–1.73 (m, 2H), 1.67–1.58 (m, 1H), 1.49–1.40 (m, 1H), 1.07 (t, *J* = 7.1 Hz, 3H), 0.99 (d, *J* = 6.7 Hz, 3H). **<sup>13</sup>C NMR** (100 MHz, DMSO-*d*<sub>6</sub>) δ 212.85, 172.89, 151.38, 141.86, 114.52, 114.06, 60.13, 56.07, 55.27, 51.91, 42.62, 34.55, 28.59, 19.70, 15.24, 14.00. **HRMS (ESI)** *m/z*: calcd for C<sub>18</sub>H<sub>25</sub>NNaO<sub>4</sub> [M+Na]<sup>+</sup> 342.1681, found 342.1670.

**Optical Rotation:** [α]<sub>D</sub><sup>25</sup> = 23.9 (*c* = 1.0, CH<sub>2</sub>Cl<sub>2</sub>). The *ee* value was determined by **HPLC analysis**: 97.9:2.1 *er*, Chiralcel AD-H column, hexane/*i*-PrOH = 90/10, flow rate = 0.7 mL/min, λ = 240 nm, retention time: *t*<sub>major</sub> = 26.4 min, *t*<sub>minor</sub> = 25.9 min.

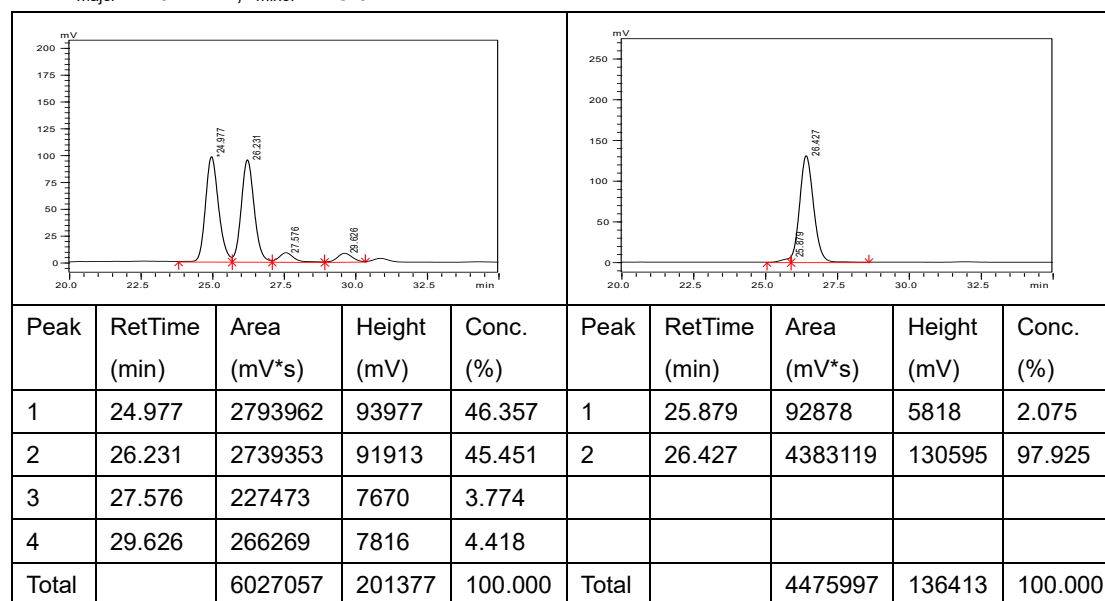

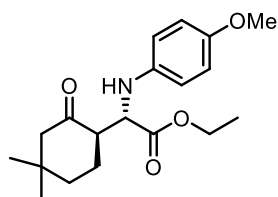

Ethyl (S)-2-((R)-4,4-dimethyl-2-oxocyclohexyl)-2-((4-methoxyphenyl)amino)acetate (**3ac**)

Yellow oil (51.3 mg, 77% yield); >99:1 *dr*. **<sup>1</sup>H NMR** (400 MHz, Chloroform-*d*)  $\delta$  6.76 (d, *J* = 8.9 Hz, 2H), 6.65 (d, *J* = 8.9 Hz, 2H), 4.18–4.10 (m, 2H), 3.97 (d, *J* = 4.0 Hz, 1H), 3.73 (s, 3H), 3.09–2.95 (m, 1H), 2.26–2.19 (m, 1H), 2.16–2.00 (m, 3H), 1.76–1.62 (m, 2H), 1.21 (t, *J* = 7.1 Hz, 3H), 1.05 (s, 3H), 0.87 (s, 3H). **<sup>13</sup>C NMR** (100 MHz, Chloroform-*d*)  $\delta$  211.02, 173.11, 152.84, 142.18, 115.83, 114.75, 61.20, 58.97, 55.69, 54.66, 52.44, 37.47, 36.25, 31.41, 26.16, 25.35, 14.09. **HRMS (ESI)** *m/z*: calcd for C<sub>19</sub>H<sub>27</sub>NNaO<sub>4</sub> [M+Na]<sup>+</sup> 356.1838, found 356.1827.

**Optical Rotation:**  $[\alpha]^{25}_D = 16.8$  (*c* = 1.0, CH<sub>2</sub>Cl<sub>2</sub>). The *ee* value was determined by **HPLC analysis:** 96.0:4.0 *er*, Chiralcel AD-H column, hexane/*i*-PrOH = 90/10, flow rate = 1.0 mL/min,  $\lambda$  = 240 nm, retention time: *t*<sub>major</sub> = 40.4 min, *t*<sub>minor</sub> = 34.2 min.

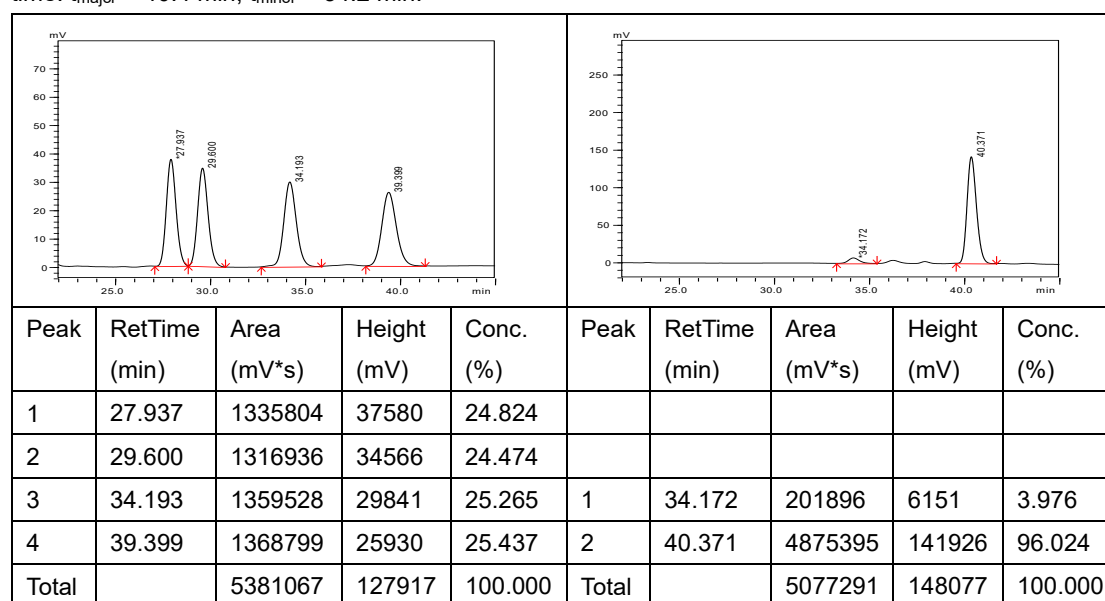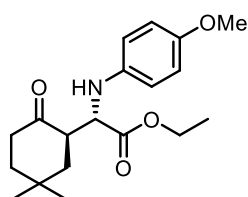

Ethyl (S)-2-((R)-5,5-dimethyl-2-oxocyclohexyl)-2-((4-methoxyphenyl)amino)acetate (**3ad**)<sup>7</sup>

Yellow oil (50.7 mg, 76% yield); 95:5 *dr*. **<sup>1</sup>H NMR** (600 MHz, Chloroform-*d*)  $\delta$  6.76 (d, *J* = 9.0 Hz, 2H), 6.63 (d, *J* = 9.0 Hz, 2H), 4.17–4.10 (m, 2H), 3.86 (d, *J* = 3.4 Hz, 1H), 3.73 (s, 3H), 3.33–3.21 (m, 1H), 2.51–2.44 (m, 1H), 2.31–2.25 (m, 1H), 1.93 (t, *J* = 13.2 Hz, 1H), 1.78–1.73 (m, 1H), 1.71–1.62 (m, 2H), 1.24 (s, 3H), 1.21 (t, *J* = 7.1 Hz, 4H), 1.04 (s, 3H). **<sup>13</sup>C NMR** (150 MHz, Chloroform-*d*)  $\delta$  211.46, 173.12, 152.79, 142.36, 115.72, 114.74, 61.16, 59.42, 55.66, 49.55, 42.88, 38.80, 37.99, 31.48, 30.63, 24.55, 14.06.

**Optical Rotation:**  $[\alpha]^{25}_D = 14.5$  (*c* = 1.0, CH<sub>2</sub>Cl<sub>2</sub>). The *ee* value was determined by **HPLC analysis:** 94.8:5.2 *er*, Chiralcel AD-H column, hexane/*i*-PrOH = 90/10, flow rate = 0.5 mL/min,  $\lambda$  = 254 nm, retention

time:  $t_{\text{major}} = 22.7 \text{ min}$ ,  $t_{\text{minor}} = 17.9 \text{ min}$ .

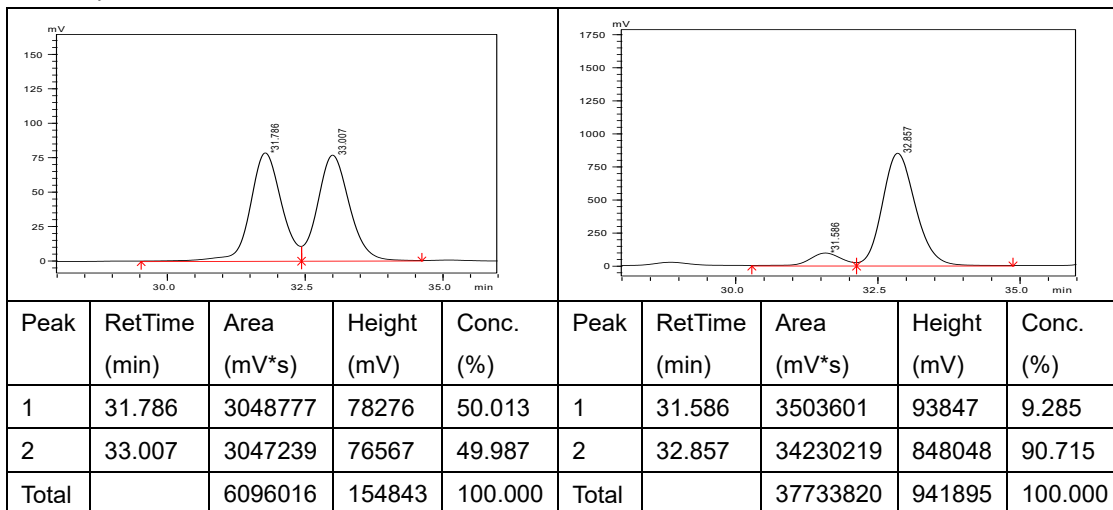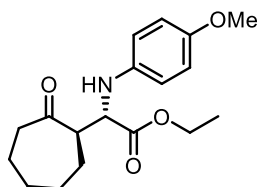

Ethyl (S)-2-((4-methoxyphenyl)amino)-2-((R)-2-oxocycloheptyl)acetate (**3ae**)<sup>7</sup>

Yellow oil (48 mg, 75% yield); 99:1 *dr*. <sup>1</sup>H NMR (400 MHz, Chloroform-*d*)  $\delta$  6.77 (d,  $J = 8.9 \text{ Hz}$ , 2H), 6.67 (d,  $J = 8.9 \text{ Hz}$ , 2H), 4.31 (d,  $J = 4.9 \text{ Hz}$ , 1H), 4.16 (q,  $J = 7.1 \text{ Hz}$ , 2H), 3.74 (s, 3H), 3.07–2.98 (m, 1H), 2.61–2.47 (m, 2H), 2.03–1.84 (m, 4H), 1.60–1.49 (m, 2H), 1.43–1.32 (m, 2H), 1.23 (t,  $J = 7.1 \text{ Hz}$ , 3H). <sup>13</sup>C NMR (100 MHz, Chloroform-*d*)  $\delta$  214.19, 172.55, 152.73, 140.91, 115.23, 114.85, 61.29, 60.69, 55.70, 54.34, 43.88, 29.90, 29.01, 27.16, 24.22, 14.15.

**Optical Rotation:**  $[\alpha]_{\text{D}}^{25} = 15.6$  ( $c = 1.0$ , CH<sub>2</sub>Cl<sub>2</sub>). The *ee* value was determined by **HPLC analysis**: 94.8:5.2 *er*, Chiralcel AD-H column, hexane/*i*-PrOH = 90/10, flow rate = 1.0 mL/min,  $\lambda = 254 \text{ nm}$ , retention time:  $t_{\text{major}} = 22.7 \text{ min}$ ,  $t_{\text{minor}} = 17.9 \text{ min}$ .

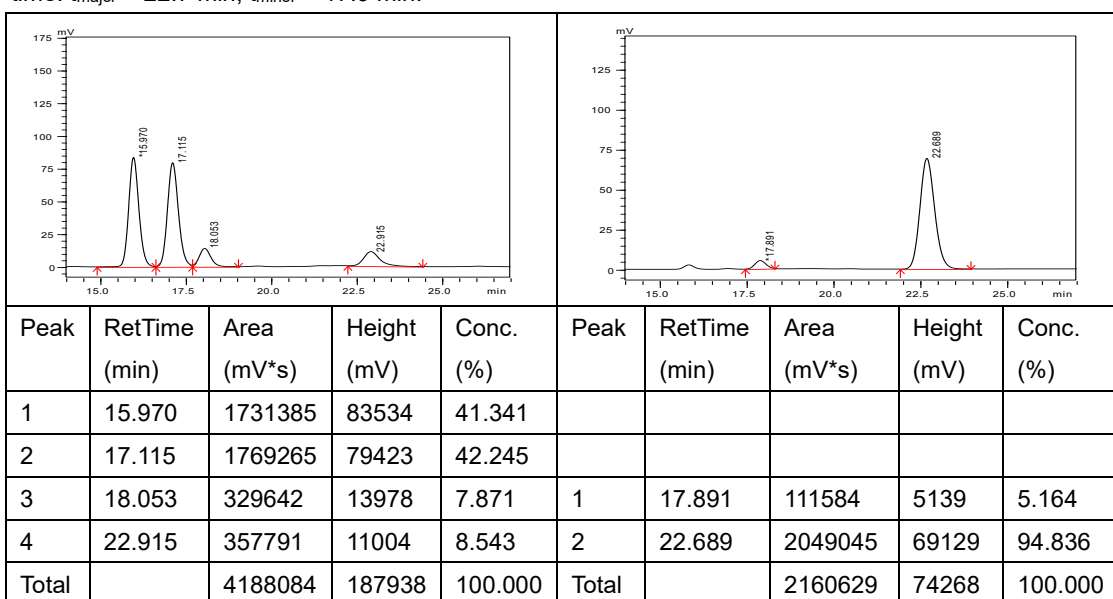



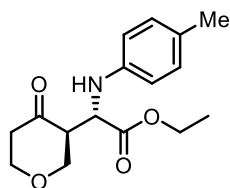

Ethyl (S)-2-((S)-4-oxotetrahydro-2H-pyran-3-yl)-2-(p-tolylamino)acetate (**3kf**)

Yellow oil (42 mg, 72% yield); 85:15 *dr*.  $^1\text{H NMR}$  (400 MHz, Chloroform-*d*)  $\delta$  6.98 (d,  $J = 8.4$  Hz, 2H), 6.56 (d,  $J = 8.4$  Hz, 2H), 4.26–4.08 (m, 5H), 3.97 (t,  $J = 5.9$  Hz, 1H), 3.93–3.82 (m, 1H), 3.84–3.72 (m, 1H), 3.32–2.88 (m, 1H), 2.65–2.54 (m, 1H), 2.53–2.43 (m, 2H), [2.23, 2.04] (s, 3H), 1.22 (t,  $J = 7.1$  Hz, 3H).  $^{13}\text{C NMR}$  (100 MHz, Chloroform-*d*)  $\delta$  206.21, 171.97, 144.86, 129.77, 128.21, 114.19, 69.94, 67.75, 61.52, 55.32, 53.77, 42.81, 42.02, 20.33, 14.05. **HRMS (ESI)**  $m/z$ : calcd for  $\text{C}_{16}\text{H}_{21}\text{NNaO}_4$   $[\text{M}+\text{Na}]^+$  314.1368, found 314.1353.

**Optical Rotation:**  $[\alpha]_{25}^{\text{D}} = 8.6$  ( $c = 1.0$ ,  $\text{CH}_2\text{Cl}_2$ ). The *ee* value was determined by **HPLC analysis:** 93.3:7.7 *er*, Chiralcel AD-H column, hexane/*i*-PrOH = 96/4, flow rate = 1.0 mL/min,  $\lambda = 254$  nm, retention time:  $t_{\text{major}} = 39.4$  min,  $t_{\text{minor}} = 32.6$  min.

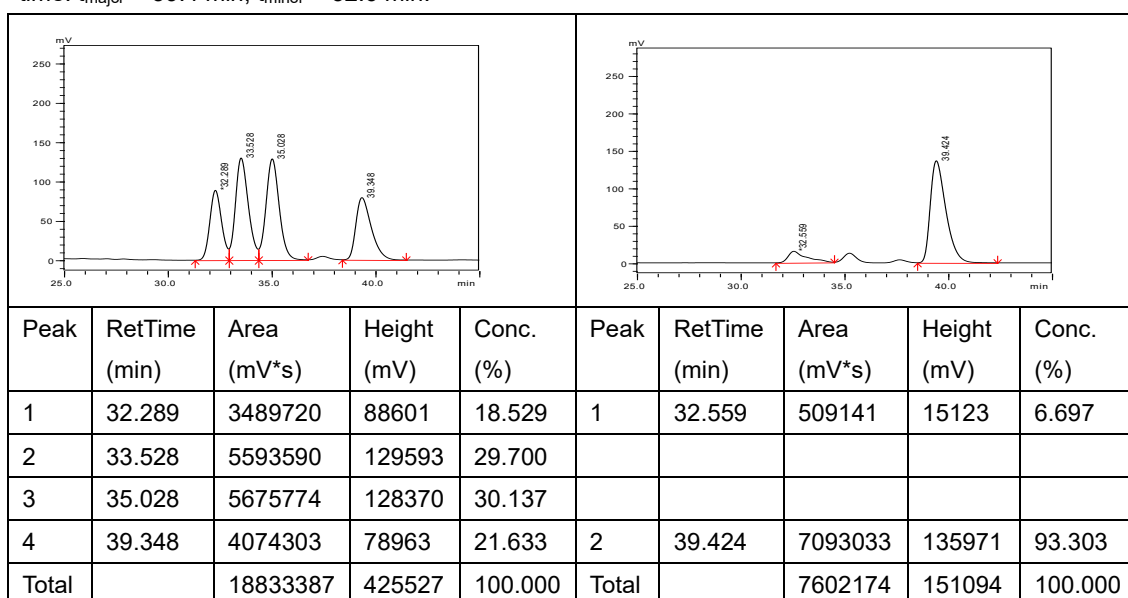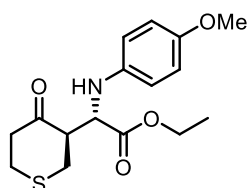

Ethyl (S)-2-((4-methoxyphenyl)amino)-2-((R)-4-oxotetrahydro-2H-thiopyran-3-yl)acetate (**3ag**)<sup>7</sup>

Yellow oil (49.2mg, 76% yield); 95:5 *dr*.  $^1\text{H NMR}$  (400 MHz, DMSO-*d*<sub>6</sub>)  $\delta$  6.71 (d,  $J = 8.9$  Hz, 2H), 6.63 (d,  $J = 9.0$  Hz, 2H), 5.17 (d,  $J = 10.0$  Hz, 1H), 4.52–4.35 (m, 1H), 4.09–4.03 (m, 2H), 3.64 (s, 3H), 3.26–3.16 (m, 1H), 3.09–3.01 (m, 1H), 2.99–2.88 (m, 3H), 2.71–2.58 (m, 2H), 1.13 (t,  $J = 7.1$  Hz, 3H).  $^{13}\text{C NMR}$  (100 MHz, DMSO-*d*<sub>6</sub>)  $\delta$  207.42, 171.93, 151.59, 141.83, 114.49, 114.34, 60.50, 56.64, 55.26, 54.50, 43.25, 31.32, 29.18, 14.03.

**Optical Rotation:**  $[\alpha]_{25}^{\text{D}} = 32.5$  ( $c = 1.0$ ,  $\text{CH}_2\text{Cl}_2$ ). The *ee* value was determined by **HPLC analysis:** 96.7:3.3 *er*, Chiralcel AD-H column, hexane/*i*-PrOH = 90/10, flow rate = 1.0 mL/min,  $\lambda = 254$  nm, retention time:  $t_{\text{major}} = 37.3$  min,  $t_{\text{minor}} = 28.9$  min.

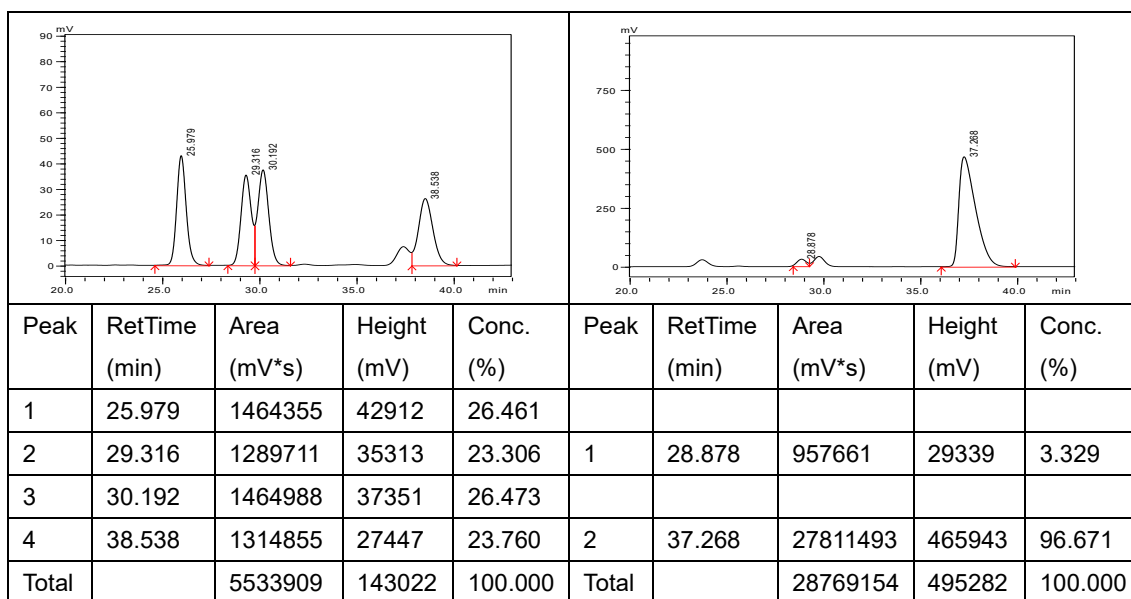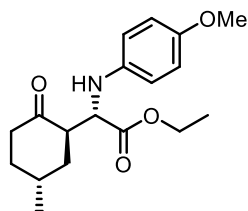

Ethyl (S)-2-((4-methoxyphenyl)amino)-2-((1R,5R)-5-methyl-2-oxocyclohexyl)acetate (**3ah**)<sup>7</sup>

Yellow oil (50.5 mg, 79% yield); 80:20 *dr*. <sup>1</sup>H NMR (400 MHz, Chloroform-*d*) δ 6.73 (d, *J* = 8.9 Hz, 2H), 6.60 (d, *J* = 8.9 Hz, 2H), 4.16–4.07 (m, 3H), 3.69 (s, 3H), 3.20–2.94 (m, 1H), 2.42–2.31 (m, 2H), 2.26–2.09 (m, 1H), 2.06–1.90 (m, 2H), 1.79–1.48 (m, 2H), 1.18 (t, *J* = 7.1 Hz, 3H), 1.11 (d, *J* = 6.9 Hz, 3H). <sup>13</sup>C NMR (100 MHz, Chloroform-*d*) δ 211.17, 172.65, 152.74, 141.23, 115.35, 114.57, 61.00, 58.80, 55.43, 50.23, 37.58, 36.13, 33.16, 26.66, 19.27, 13.99.

**Optical Rotation:**  $[\alpha]_D^{25} = 23.6$  (*c* = 1.0, CH<sub>2</sub>Cl<sub>2</sub>). The *ee* value was determined by **HPLC analysis:** 95.6:4.4 *er*, Chiralcel AD-H column, hexane/*i*-PrOH = 90/10, flow rate = 0.5 mL/min, λ = 254 nm, retention time: *t*<sub>major</sub> = 41.1 min, *t*<sub>minor</sub> = 37.2 min.

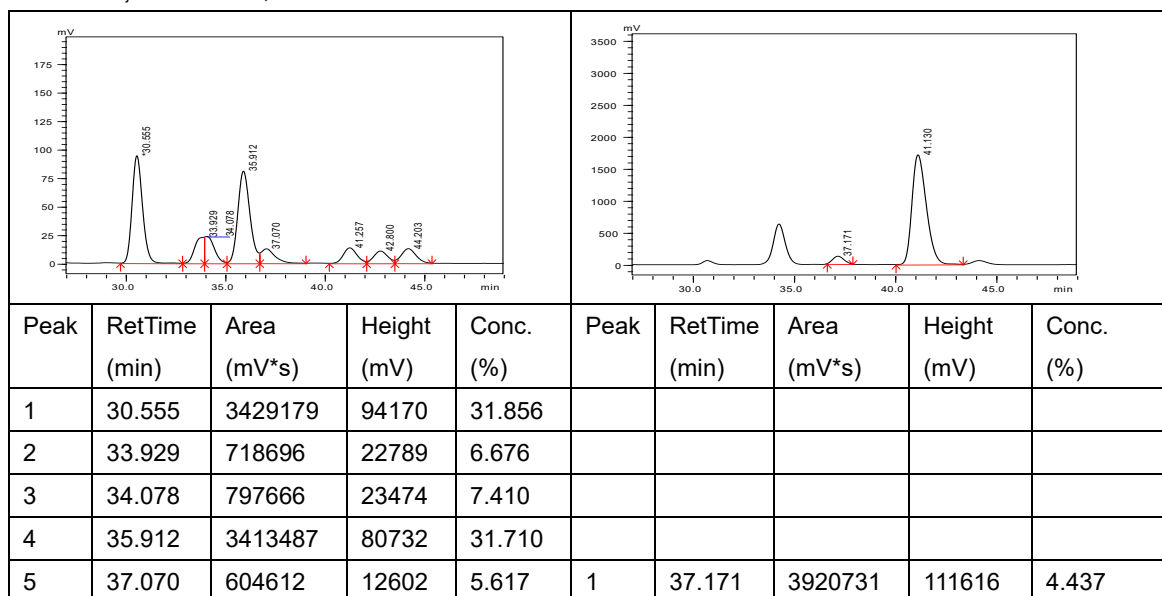

|       |        |          |        |         |       |        |          |         |         |
|-------|--------|----------|--------|---------|-------|--------|----------|---------|---------|
| 6     | 41.257 | 634184   | 13496  | 5.891   | 2     | 41.130 | 84444729 | 1713470 | 95.563  |
| 7     | 42.800 | 518317   | 10633  | 4.815   |       |        |          |         |         |
| 8     | 44.203 | 648479   | 12665  | 6.024   |       |        |          |         |         |
| Total |        | 10764620 | 270560 | 100.000 | Total |        | 88365460 | 1825086 | 100.000 |

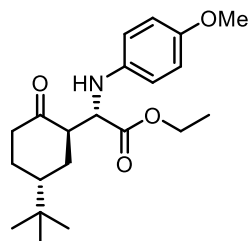

Ethyl (S)-2-((1R,5R)-5-(tert-butyl)-2-oxocyclohexyl)-2-((4-methoxyphenyl)amino)acetate (**3ai**)<sup>7</sup>

Yellow oil (52 mg, 72% yield); 98:2 *dr*. <sup>1</sup>H NMR (400 MHz, Chloroform-*d*) δ 6.74 (d, *J* = 8.9 Hz, 2H), 6.62 (d, *J* = 8.9 Hz, 2H), 4.32 (d, *J* = 9.2 Hz, 1H), 4.19–4.10 (m, 2H), 3.72 (s, 3H), 2.85–2.66 (m, 1H), 2.46–2.32 (m, 2H), 2.08–1.97 (m, 2H), 1.78–1.62 (m, 2H), 1.55–1.44 (m, 1H), 1.21 (t, *J* = 7.1 Hz, 4H), 0.92 (s, 9H). <sup>13</sup>C NMR (100 MHz, DMSO-*d*<sub>6</sub>) δ 210.35, 173.03, 151.72, 142.78, 114.90, 114.43, 60.56, 57.09, 55.69, 52.11, 46.01, 41.08, 32.63, 30.98, 27.85, 27.59, 14.55.

**Optical Rotation:** [α]<sub>D</sub><sup>25</sup> = 26.5 (c = 1.0, CH<sub>2</sub>Cl<sub>2</sub>). The *ee* value was determined by **HPLC analysis:** 98.7:1.3 *er*, Chiralcel AD-H column, hexane/*i*-PrOH = 90/10, flow rate = 1.0 mL/min, λ = 254 nm, retention time: *t*<sub>major</sub> = 17.6 min, *t*<sub>minor</sub> = 15.9 min.

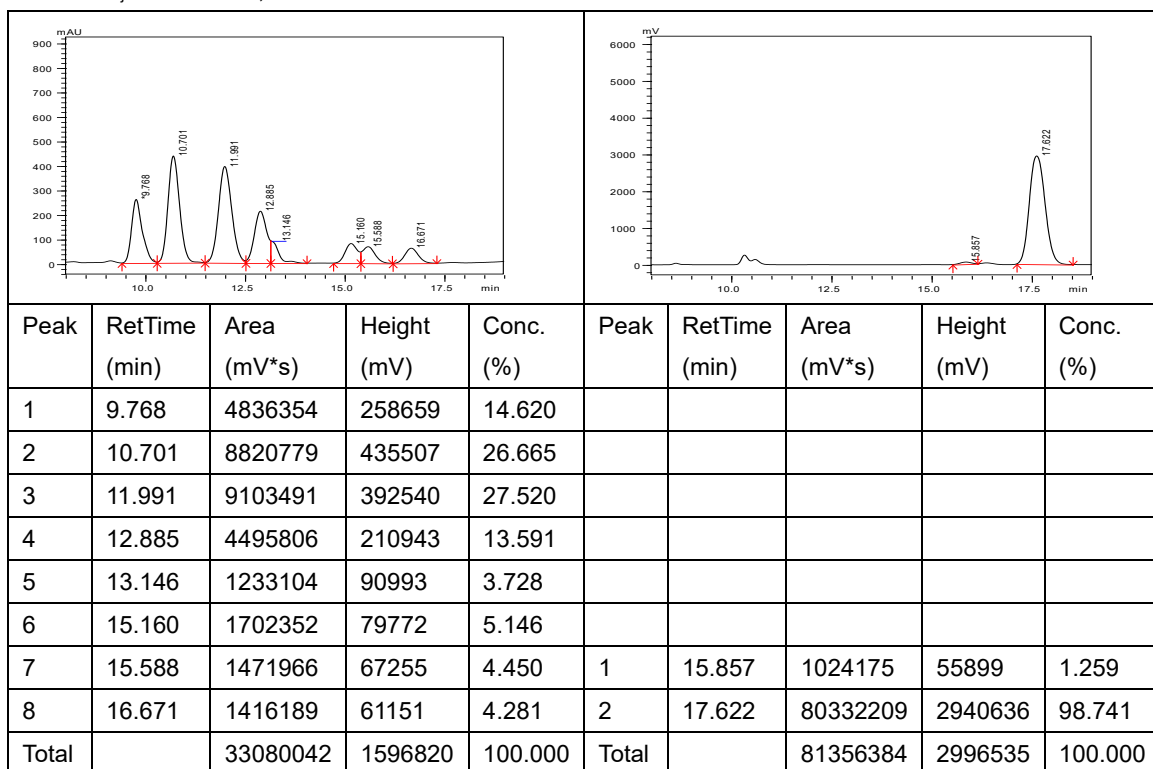

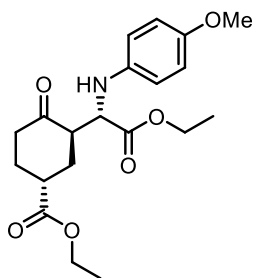

Ethyl (1R,3R)-3-((S)-2-ethoxy-1-((4-methoxyphenyl)amino)-2-oxoethyl)-4-oxocyclohexan-e-1-carboxylate (**3aj**)<sup>7</sup>

Yellow oil (62.6 mg, 83% yield); 97:3 *dr*. <sup>1</sup>H NMR (400 MHz, Chloroform-*d*) δ 6.78 (d, *J* = 8.9 Hz, 2H), 6.66 (d, *J* = 8.9 Hz, 2H), 4.26 (q, *J* = 7.1 Hz, 2H), 4.21–4.14 (m, 2H), 3.96 (d, *J* = 4.3 Hz, 1H), 3.76 (s, 3H), 3.45–3.30 (m, 1H), 3.02–2.90 (m, 1H), 2.60–2.32 (m, 4H), 2.28–2.19 (m, 1H), 2.01–1.95 (m, 1H), 1.33 (t, *J* = 7.1 Hz, 4H), 1.23 (t, *J* = 7.1 Hz, 3H). <sup>13</sup>C NMR (100 MHz, Chloroform-*d*) δ 210.12, 173.99, 172.67, 152.94, 142.05, 115.75, 114.79, 61.30, 60.95, 59.13, 55.70, 50.20, 38.48, 38.20, 31.05, 27.61, 14.25, 14.10.

**Optical Rotation:**  $[\alpha]^{25}_D = 29.2$  (*c* = 1.0, CH<sub>2</sub>Cl<sub>2</sub>). The *ee* value was determined by **HPLC analysis:** 96.5:3.5 *er*, Chiralcel AD-H column, hexane/*i*-PrOH = 90/10, flow rate = 1.0 mL/min, λ = 240 nm, retention time: *t*<sub>major</sub> = 37.0 min, *t*<sub>minor</sub> = 23.4 min.

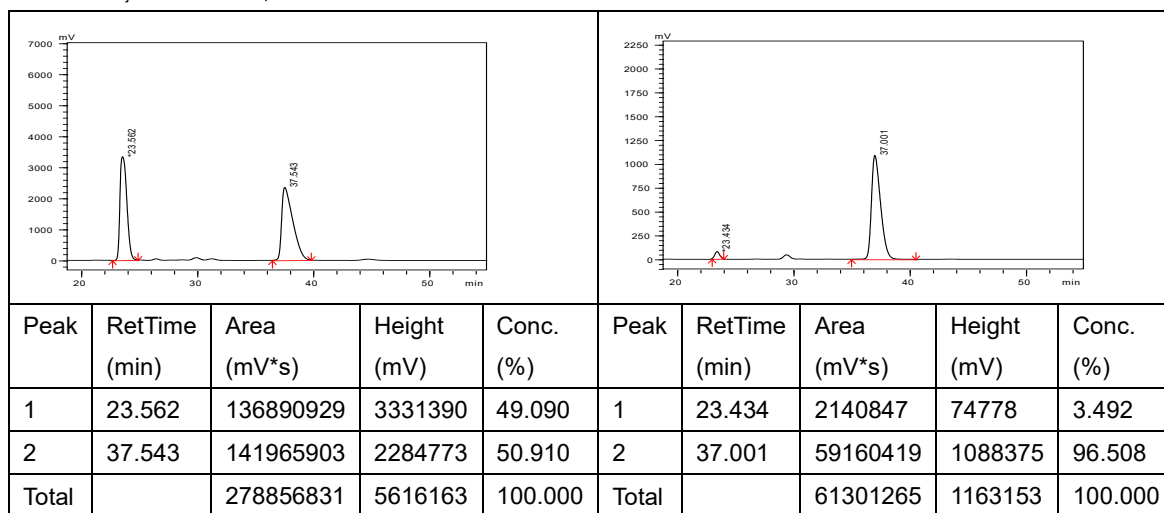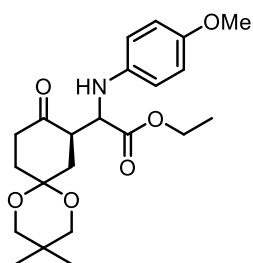

Ethyl 2-((R)-3,3-dimethyl-9-oxo-1,5-dioxaspiro[5.5]undecan-8-yl)-2-((4-methoxyphenyl)amino)acetate (**3ak**)<sup>7</sup>

Yellow oil (63 mg, 78% yield); 97:3 *dr*. <sup>1</sup>H NMR (600 MHz, Chloroform-*d*) δ 6.76 (d, *J* = 8.8 Hz, 2H), 6.63 (d, *J* = 8.9 Hz, 2H), 4.25–4.07 (m, 3H), 3.94 (d, *J* = 3.4 Hz, 1H), 3.73 (s, 3H), 3.57 (s, 2H), 3.55 (d, *J* = 5.1 Hz, 2H), 3.40–3.32 (m, 1H), 2.60–2.50 (m, 3H), 2.36–2.29 (m, 1H), 2.07 (t, *J* = 13.3 Hz, 1H), 1.80–1.72 (m, 1H), 1.21 (t, *J* = 7.1 Hz, 3H), 1.04 (s, 3H), 0.98 (s, 3H). <sup>13</sup>C NMR (150 MHz, Chloroform-*d*) δ 209.91,

172.69, 152.97, 142.13, 115.89, 114.81, 96.60, 70.74, 70.47, 61.30, 59.02, 55.71, 48.82, 36.85, 35.42, 30.51, 30.24, 22.64, 22.52, 14.10.

**Optical Rotation:**  $[\alpha]_D^{25} = 20.8$  ( $c = 1.0$ ,  $\text{CH}_2\text{Cl}_2$ ). The *ee* value was determined by **HPLC analysis:** 98.9:1.1 *er*, Chiralcel AD-H column, hexane/*i*-PrOH = 90/10, flow rate = 1.0 mL/min,  $\lambda = 240$  nm, retention time:  $t_{\text{major}} = 29.1$  min,  $t_{\text{minor}} = 21.5$  min.

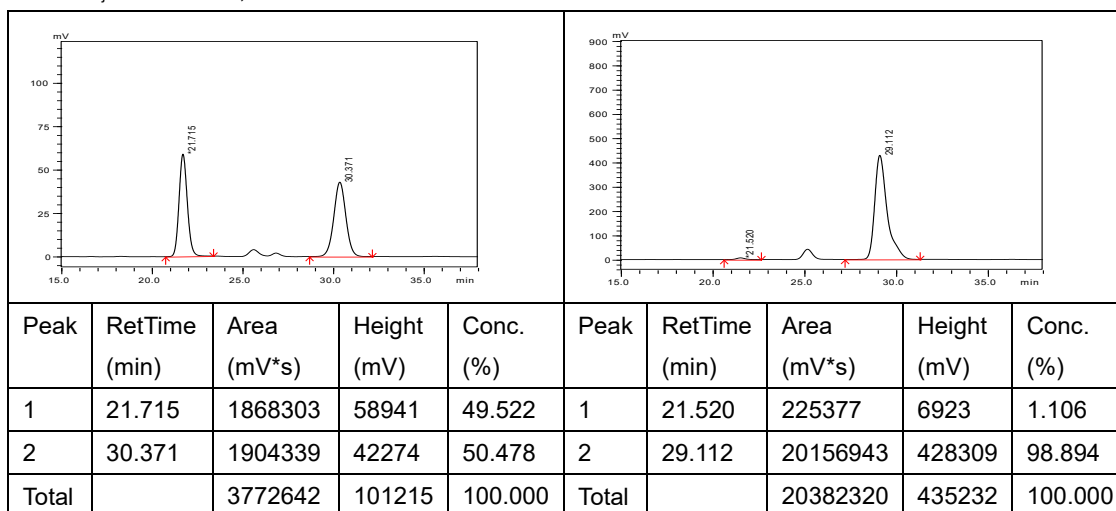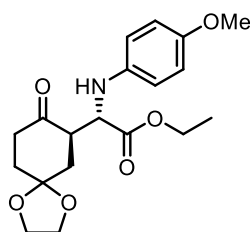

Ethyl (S)-2-((4-methoxyphenyl)amino)-2-((R)-8-oxo-1,4-dioxaspiro[4.5]decan-7-yl)acetate (**3a**)<sup>7</sup>

Yellow oil (59.5mg, 82% yield); >99:1 dr. <sup>1</sup>H NMR (400 MHz, Chloroform-*d*)  $\delta$  6.75 (d,  $J = 8.9$  Hz, 2H), 6.62 (d,  $J = 8.9$  Hz, 2H), 4.37–4.09 (m, 3H), 4.09–4.00 (m, 4H), 3.91 (d,  $J = 3.6$  Hz, 1H), 3.73 (s, 3H), 3.53–3.42 (m, 1H), 2.72–2.62 (m, 1H), 2.45–2.36 (m, 1H), 2.29 (t,  $J = 13.1$  Hz, 1H), 2.14–2.07 (m, 1H), 2.05–1.93 (m, 2H), 1.21 (t,  $J = 7.1$  Hz, 3H). <sup>13</sup>C NMR (100 MHz, Chloroform-*d*)  $\delta$  209.58, 172.65, 152.89, 142.10, 115.83, 114.72, 107.47, 64.81, 64.65, 61.29, 58.98, 55.65, 50.00, 37.96, 37.59, 33.81, 14.08.

**Optical Rotation:**  $[\alpha]_D^{25} = 22.0$  ( $c = 1.0$ ,  $\text{CH}_2\text{Cl}_2$ ). The *ee* value was determined by **HPLC analysis:** 99.7:0.3 *er*, Chiralcel AD-H column, hexane/*i*-PrOH = 90/10, flow rate = 1.0 mL/min,  $\lambda = 254$  nm, retention time:  $t_{\text{major}} = 49.0$  min,  $t_{\text{minor}} = 44.0$  min.

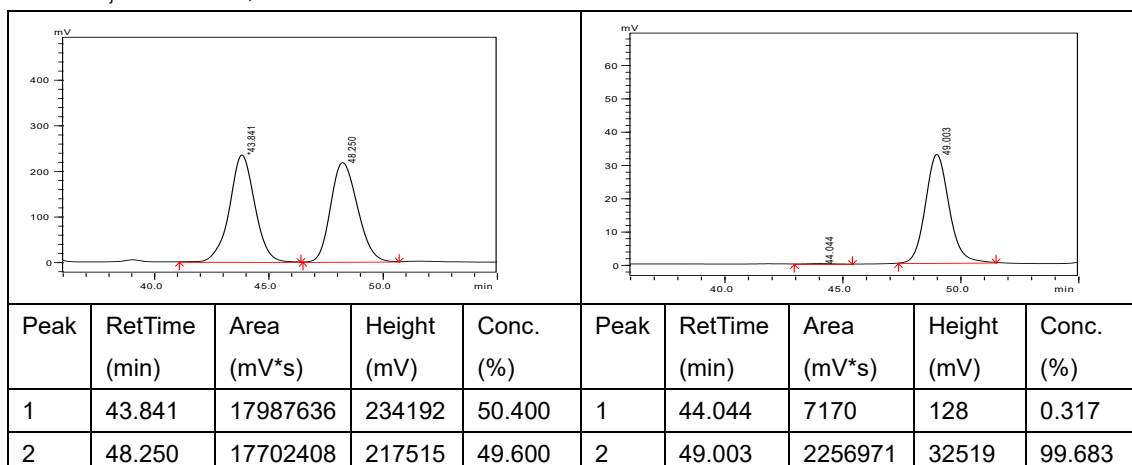

|       |  |          |        |         |       |  |         |       |         |
|-------|--|----------|--------|---------|-------|--|---------|-------|---------|
| Total |  | 35690044 | 451707 | 100.000 | Total |  | 2264141 | 32646 | 100.000 |
|-------|--|----------|--------|---------|-------|--|---------|-------|---------|

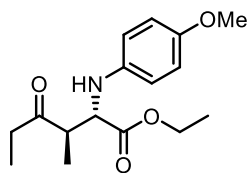

Ethyl (2S,3R)-2-((4-methoxyphenyl)amino)-3-methyl-4-oxohexanoate (**3am**)<sup>7</sup>

Yellow oil (37 mg, 63% yield); 99:1 *dr*. <sup>1</sup>H NMR (600 MHz, Chloroform-*d*) δ 6.75 (d, *J* = 9.0 Hz, 2H), 6.64 (d, *J* = 9.0 Hz, 2H), 4.19 (d, *J* = 7.0 Hz, 1H), 4.16–4.10 (m, 2H), 3.73 (s, 3H), 3.08–2.98 (m, 1H), 2.58–2.49 (m, 2H), 1.20 (t, *J* = 7.2 Hz, 3H), 1.17 (d, *J* = 7.1 Hz, 3H), 1.06 (t, *J* = 7.2 Hz, 3H). <sup>13</sup>C NMR (150 MHz, Chloroform-*d*) δ 212.20, 172.76, 153.05, 140.80, 115.81, 114.79, 61.16, 60.78, 55.64, 48.36, 34.94, 14.12, 13.36, 7.50.

**Optical Rotation:**  $[\alpha]_D^{25} = -19.6$  (*c* = 1.0, CH<sub>2</sub>Cl<sub>2</sub>). The *ee* value was determined by **HPLC analysis:** 96.5:3.5 *er*, Chiralcel AD-H column, hexane/*i*-PrOH = 96/4, flow rate = 1.0 mL/min, λ = 240 nm, retention time: *t*<sub>major</sub> = 32.2 min, *t*<sub>minor</sub> = 37.0 min.

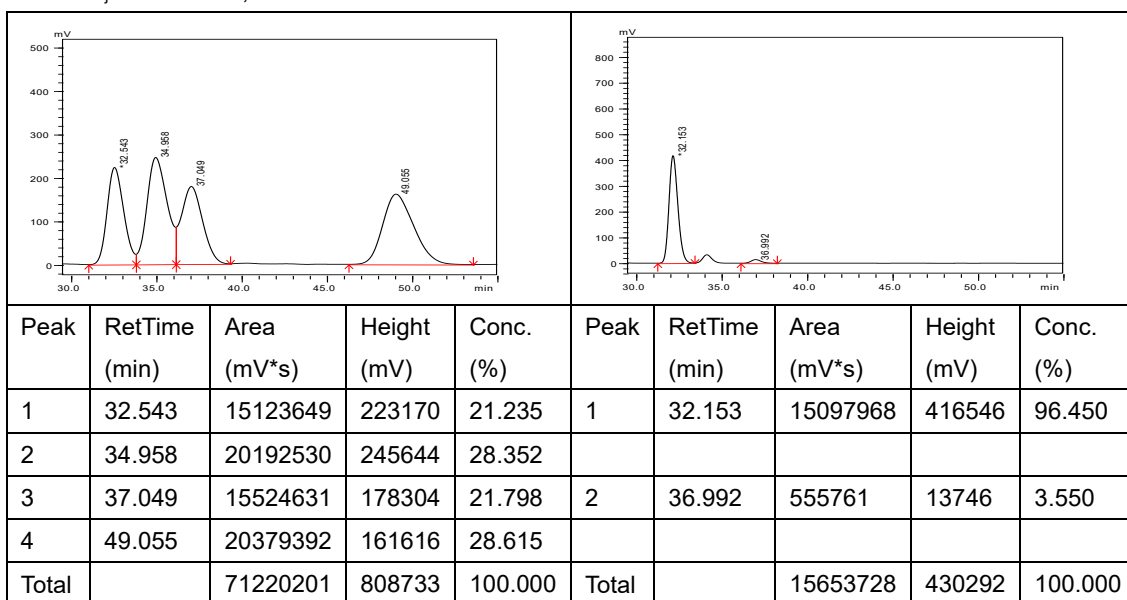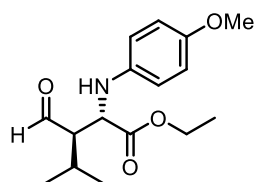

Ethyl (2S,3R)-3-formyl-2-((4-methoxyphenyl)amino)-4-methylpentanoate (**3an**)<sup>7</sup>

Yellow oil (38.7 mg, 66% yield); 90:10 *dr*. <sup>1</sup>H NMR (600 MHz, Chloroform-*d*) δ 9.74 (d, *J* = 3.5 Hz, 1H), 6.76 (d, *J* = 8.9 Hz, 2H), 6.66 (d, *J* = 8.9 Hz, 2H), 4.35 (d, *J* = 7.7 Hz, 1H), 4.14 (q, *J* = 7.2 Hz, 2H), 3.73 (s, 3H), 2.61–2.53 (m, 1H), 2.16–2.05 (m, 1H), 1.20 (t, *J* = 7.1 Hz, 3H), 1.11 (d, *J* = 6.9 Hz, 3H), 1.07 (d, *J* = 6.9 Hz, 3H). <sup>13</sup>C NMR (150 MHz, Chloroform-*d*) δ 203.20, 172.81, 153.26, 140.46, 115.86, 114.77, 61.30, 59.58, 57.24, 55.59, 27.51, 21.20, 19.12, 14.08.

**Optical Rotation:**  $[\alpha]_D^{25} = -17.8$  (*c* = 1.0, CH<sub>2</sub>Cl<sub>2</sub>). The *ee* value was determined by **HPLC analysis:**

96.4:3.6 *er*, Chiralcel AD-H column, hexane/*i*-PrOH = 88/12, flow rate = 0.5 mL/min,  $\lambda$  = 240 nm, retention time:  $t_{\text{major}}$  = 31.4 min,  $t_{\text{minor}}$  = 35.4 min.

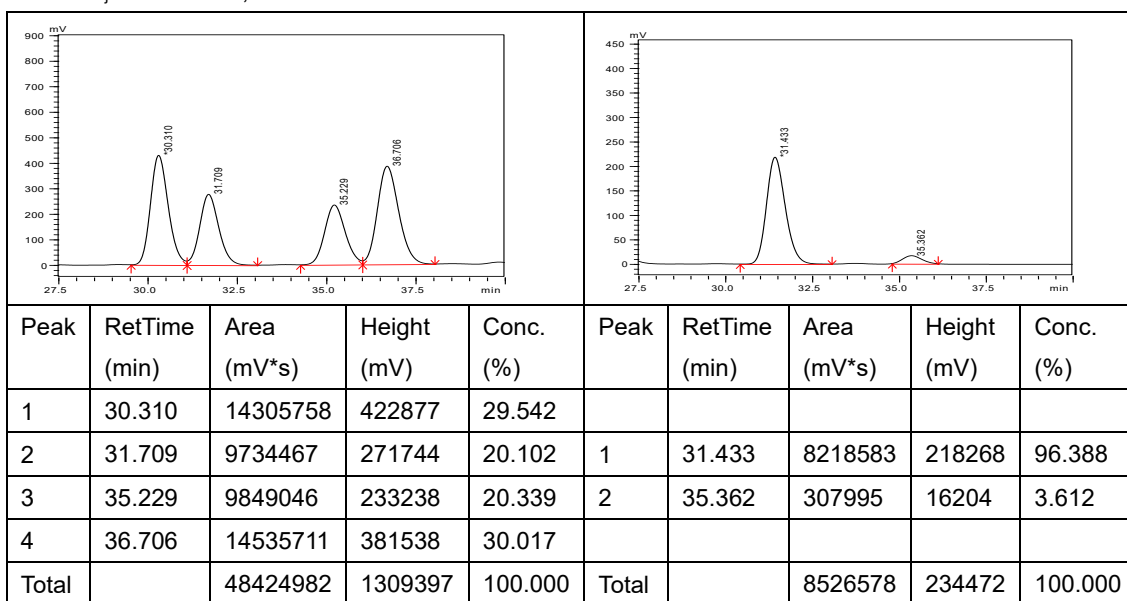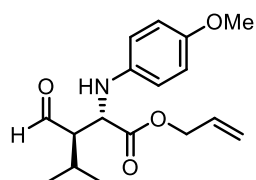

Ethyl (2*S*,3*R*)-3-formyl-2-((4-methoxyphenyl)amino)octanoate (**3en**)<sup>7</sup>

Yellow oil (43.3 mg, 71% yield); 99:1 *dr*. <sup>1</sup>H NMR (400 MHz, DMSO-*d*<sub>6</sub>)  $\delta$  9.66 (d,  $J$  = 3.9 Hz, 1H), 6.73 (d,  $J$  = 9.0 Hz, 2H), 6.68 (d,  $J$  = 9.0 Hz, 2H), 5.83 (m, 1H), 5.66 (d,  $J$  = 10.7 Hz, 1H), 5.24 (dd,  $J$  = 17.3, 1.7 Hz, 1H), 5.17 (dd,  $J$  = 10.5, 1.6 Hz, 1H), 4.56 (d,  $J$  = 5.3 Hz, 2H), 4.53–4.47 (m, 1H), 3.64 (s, 3H), 2.50–2.44 (m, 1H), 2.02–1.88 (m, 1H), 1.01 (d,  $J$  = 6.9 Hz, 3H), 0.97 (d,  $J$  = 6.8 Hz, 3H). <sup>13</sup>C NMR (100 MHz, DMSO-*d*<sub>6</sub>)  $\delta$  203.74, 172.27, 151.87, 141.20, 132.19, 117.85, 114.62, 114.48, 64.83, 58.60, 56.02, 55.23, 26.87, 20.97, 18.42.

**Optical Rotation:**  $[\alpha]_{\text{D}}^{25} = -26.5$  ( $c$  = 1.0, CH<sub>2</sub>Cl<sub>2</sub>). The *ee* value was determined by HPLC analysis: 96.1:3.9 *er*, Chiralcel AD-H column, hexane/*i*-PrOH = 98/2, flow rate = 1.0 mL/min,  $\lambda$  = 254 nm, retention time:  $t_{\text{major}}$  = 87.5 min,  $t_{\text{minor}}$  = 66.8 min.

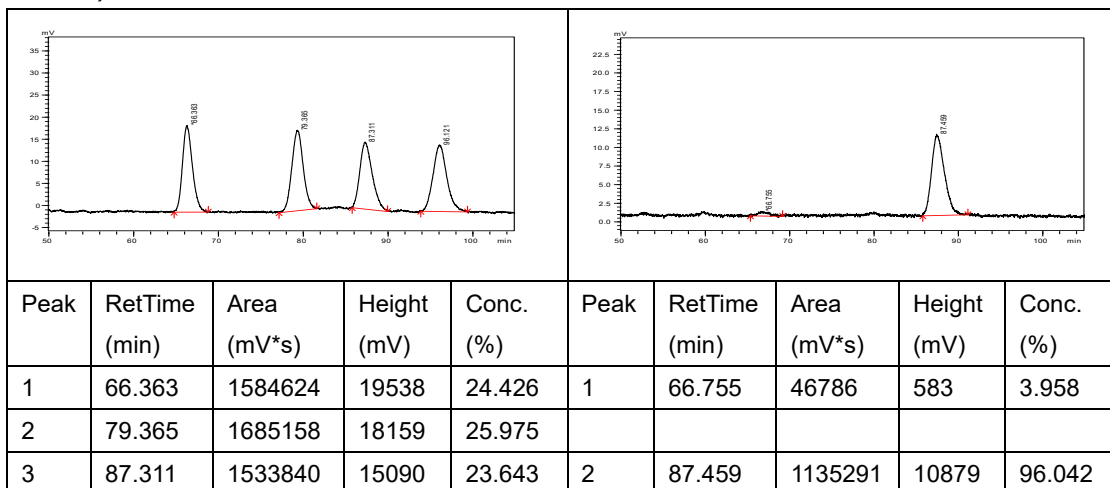

|       |        |         |       |         |       |  |         |       |         |
|-------|--------|---------|-------|---------|-------|--|---------|-------|---------|
| 4     | 96.121 | 1683905 | 15029 | 25.956  |       |  |         |       |         |
| Total |        | 6487528 | 67816 | 100.000 | Total |  | 1182078 | 11463 | 100.000 |

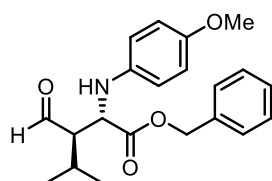

Benzyl (2S,3R)-3-formyl-2-((4-methoxyphenyl)amino)-4-methylpentanoate (**3gn**)<sup>7</sup>

Yellow oil (48 mg, 68% yield); 92:8 *dr*. <sup>1</sup>H NMR (400 MHz, Chloroform-*d*) δ 9.72 (d, *J* = 3.4 Hz, 1H), 7.37–7.28 (m, 3H), 7.26–7.14 (m, 2H), 6.76 (d, *J* = 8.9 Hz, 2H), 6.66 (d, *J* = 8.9 Hz, 2H), 5.13 (d, *J* = 1.1 Hz, 2H), 4.43 (d, *J* = 7.9 Hz, 1H), 3.74 (s, 3H), 2.68–2.57 (m, 1H), 2.09–1.98 (m, 1H), 1.10 (d, *J* = 7.0 Hz, 3H), 1.04 (d, *J* = 6.8 Hz, 3H). <sup>13</sup>C NMR (100 MHz, Chloroform-*d*) δ 203.09, 172.66, 153.22, 140.30, 135.11, 128.42, 128.27, 128.13, 115.85, 114.72, 66.95, 59.41, 57.16, 55.52, 27.46, 21.12, 18.98.

**Optical Rotation:** [α]<sub>D</sub><sup>25</sup> = -11.3 (c = 1.0, CH<sub>2</sub>Cl<sub>2</sub>). The ee value was determined by **HPLC analysis:** 96.7:3.3 *er*, Chiralcel AD-H column, hexane/*i*-PrOH = 90/10, flow rate = 0.7 mL/min, λ = 254 nm, retention time: *t*<sub>major</sub> = 26.7 min, *t*<sub>minor</sub> = 17.5 min.

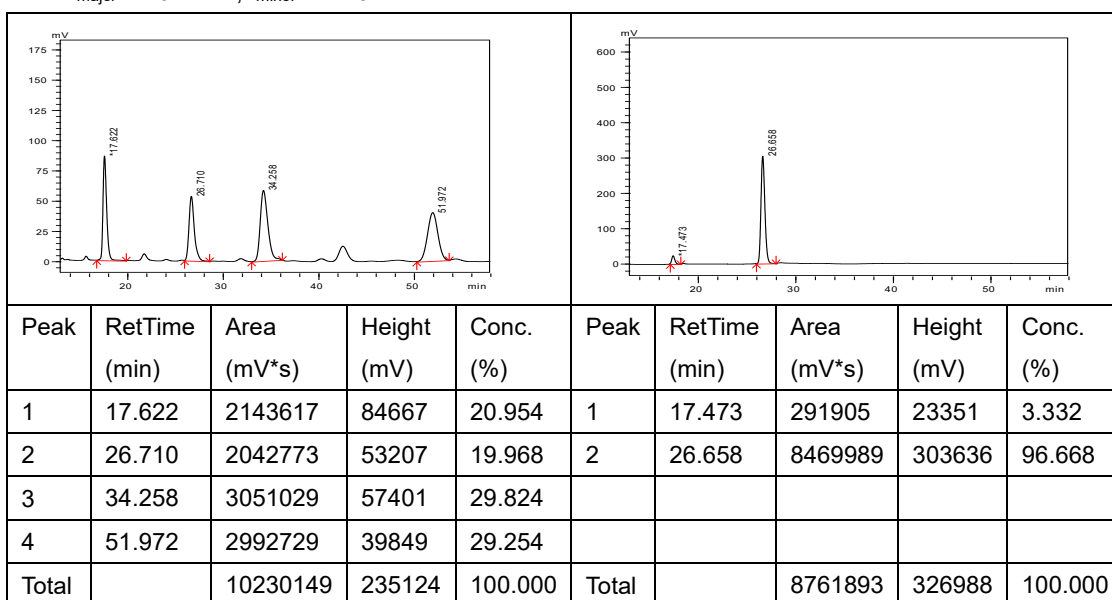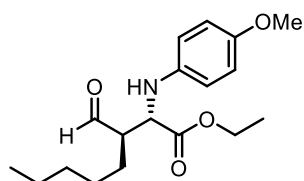

Ethyl (2S,3R)-3-formyl-2-((4-methoxyphenyl)amino)octanoate (**3ao**)<sup>7</sup>

Yellow oil (43.7 mg, 68% yield); 92:8 *dr*. <sup>1</sup>H NMR (400 MHz, Chloroform-*d*) δ 9.65 (d, *J* = 2.5 Hz, 1H), 6.77 (d, *J* = 8.9 Hz, 2H), 6.64 (d, *J* = 8.9 Hz, 2H), 4.26 (d, *J* = 6.5 Hz, 1H), 4.21–4.12 (m, 2H), 3.73 (s, 3H), 2.87–2.64 (m, 1H), 1.78–1.67 (m, 1H), 1.60–1.51 (m, 1H), 1.37–1.26 (m, 6H), 1.22 (t, *J* = 7.1 Hz, 3H), 0.89–0.84 (m, 3H). <sup>13</sup>C NMR (100 MHz, Chloroform-*d*) δ 202.34, 172.27, 153.20, 140.39, 115.72, 114.88, 61.53, 58.14, 55.68, 53.97, 31.68, 26.99, 25.69, 22.36, 14.18, 13.96.

**Optical Rotation:** [α]<sub>D</sub><sup>25</sup> = -22.6 (c = 1.0, CH<sub>2</sub>Cl<sub>2</sub>). The ee value was determined by **HPLC analysis:**



96.6:3.4 *er*, Chiralcel AD-H column, hexane/*i*-PrOH = 90/10, flow rate = 0.7 mL/min,  $\lambda$  = 254 nm, retention time:  $t_{\text{major}}$  = 17.4 min,  $t_{\text{minor}}$  = 18.3 min.

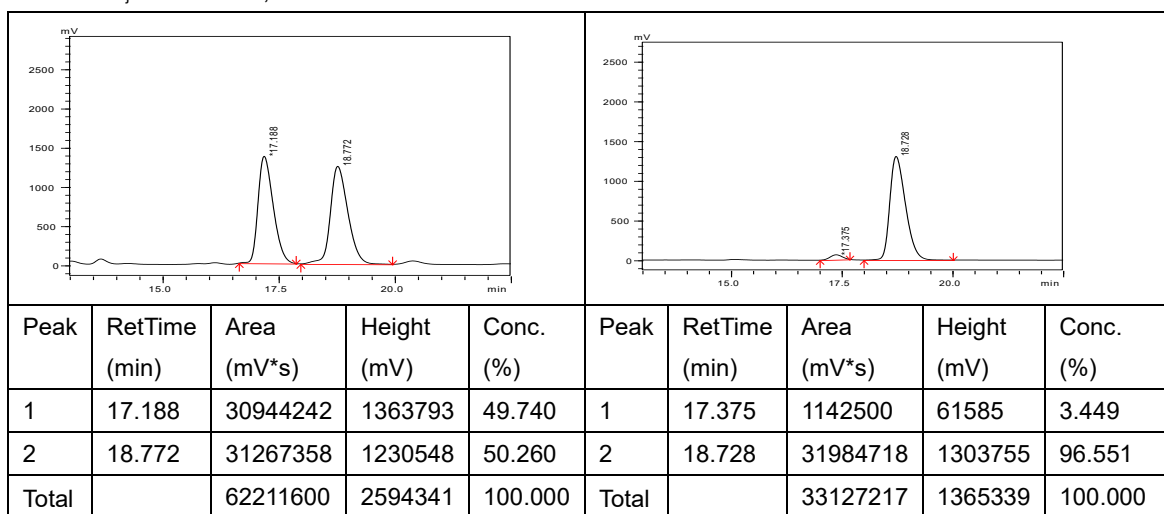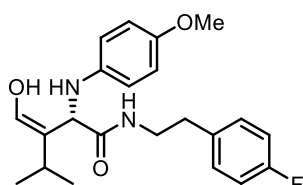

(*S,Z*)-*N*-(4-fluorophenethyl)-3-(hydroxymethylene)-2-((4-methoxyphenyl)amino)-4-methyl-pentanamide (**3pn**)

Yellow oil (47.9 mg, 62% yield); **<sup>1</sup>H NMR** (400 MHz, Chloroform-*d*)  $\delta$  7.23–7.03 (m, 1H), 7.03–6.86 (m, 5H), 6.75 (d,  $J$  = 8.9 Hz, 2H), 6.51 (d,  $J$  = 8.9 Hz, 2H), 5.84 (s, 1H), 5.07 (s, 1H), 3.75 (s, 3H), 3.72 (s, 1H), 3.31–3.19 (m, 1H), 3.01–2.77 (m, 2H), 2.75–2.67 (m, 1H), 2.60–2.48 (m, 1H), 1.13 (d,  $J$  = 6.7 Hz, 3H), 1.05 (d,  $J$  = 7.0 Hz, 3H). **<sup>13</sup>C NMR** (100 MHz, Chloroform-*d*)  $\delta$  169.99, 167.85, 161.52 (d,  $J_1$  = 243 Hz, Cq), 153.30, 139.14, 134.74, 134.71 (d,  $J_4$  = 3 Hz, Cq), 130.27 (d,  $J_3$  = 7 Hz, CH), 130.19, 120.58, 115.52, 115.20 (d,  $J_2$  = 21 Hz, CH), 115.00, 72.93, 55.64, 41.40, 34.08, 27.03, 22.27, 20.08. **<sup>19</sup>F NMR** (376 MHz, Chloroform-*d*)  $\delta$  -116.58. **HRMS (ESI)  $m/z$** : calcd for C<sub>22</sub>H<sub>26</sub><sup>19</sup>FN<sub>2</sub>O<sub>4</sub> [M+H]<sup>+</sup> 369.1973, found 369.1981.

**Optical Rotation:**  $[\alpha]_{\text{D}}^{25} = -19.4$  ( $c$  = 1.0, CH<sub>2</sub>Cl<sub>2</sub>). The *ee* value was determined by **HPLC analysis**: 95.0:5.0 *er*, Chiralcel AD-H column, hexane/*i*-PrOH = 90/10, flow rate = 1.5 mL/min,  $\lambda$  = 254 nm, retention time:  $t_{\text{major}}$  = 10.1 min,  $t_{\text{minor}}$  = 35.5 min.

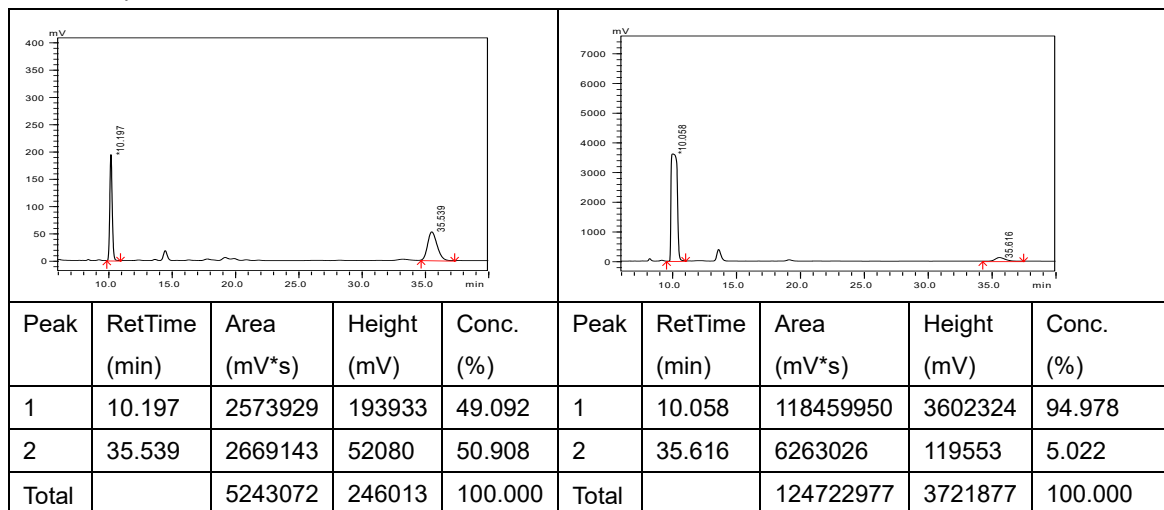

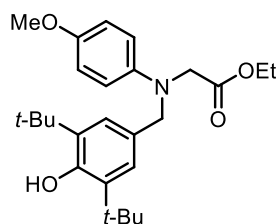

Ethyl *N*-(3,5-di-*tert*-butyl-4-hydroxybenzyl)-*N*-(4-methoxyphenyl)glycinate (**1a-BHT**)<sup>9</sup>

Colorless oil; **<sup>1</sup>H NMR** (400 MHz, Chloroform-*d*)  $\delta$  7.07 (s, 2H), 6.81 (d, *J* = 9.1 Hz, 2H), 6.73 (d, *J* = 9.2 Hz, 2H), 5.14 (s, 1H), 4.47 (s, 2H), 4.17 (q, *J* = 7.1 Hz, 2H), 3.94 (s, 2H), 3.75 (s, 3H), 1.41 (s, 18H), 1.23 (s, 3H).

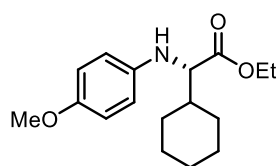

Ethyl (*S*)-2-cyclohexyl-2-((4-methoxyphenyl)amino)acetate (**4**)<sup>10</sup>

Colorless oil (371 mg, 78% yield). **<sup>1</sup>H NMR** (400 MHz, DMSO-*d*<sub>6</sub>)  $\delta$  6.66 (d, *J* = 9.0 Hz, 2H), 6.52 (d, *J* = 8.9 Hz, 2H), 4.04 (m, 2H), 3.63 (m, 1H), 3.60 (s, 3H), 1.83 (m, 1H), 1.73–1.51 (m, 5H), 1.12–1.11 (m, 8H). **<sup>13</sup>C NMR** (100 MHz, DMSO-*d*<sub>6</sub>)  $\delta$  173.68, 151.07, 142.25, 114.49, 113.62, 62.16, 59.93, 55.26, 40.22, 29.15, 29.13, 25.86, 25.64, 14.24.

**Optical Rotation:**  $[\alpha]^{25}_{\text{D}} = 26.8$  (*c* = 1.0, CH<sub>2</sub>Cl<sub>2</sub>). The *ee* value was determined by **HPLC analysis:** 97.4:2.6 *er*, Chiralcel AD-H column, hexane/*i*-PrOH = 88/12, flow rate = 1.0 mL/min,  $\lambda$  = 214 nm, retention time: *t*<sub>major</sub> = 17.7 min, *t*<sub>minor</sub> = 16.4 min.

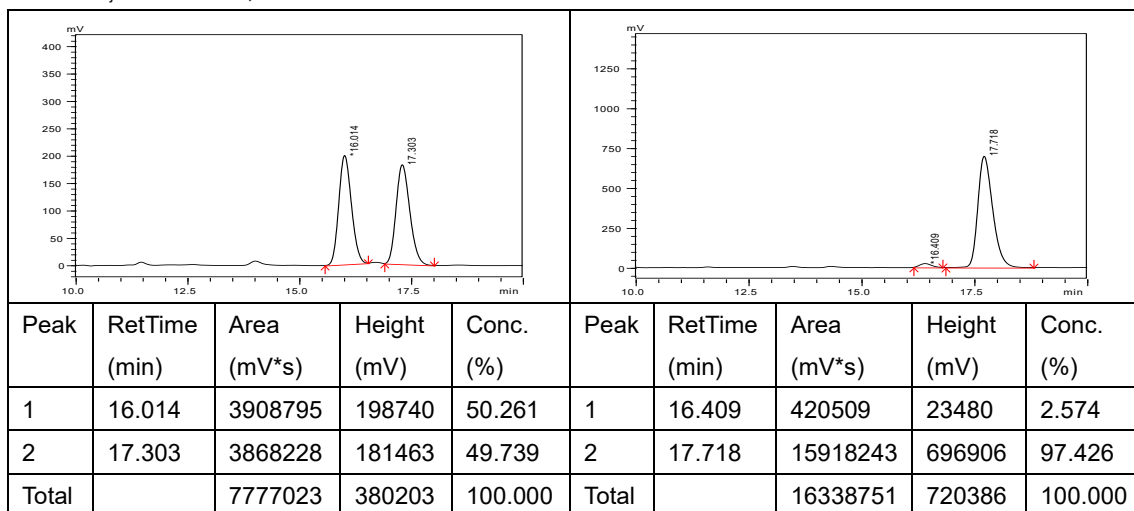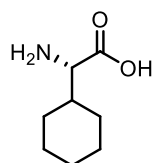

(*S*)-2-amino-2-cyclohexylacetic acid (**5**)<sup>11</sup>

White powder (138 mg, 88% yield). **<sup>1</sup>H NMR** (600 MHz, Methanol-*d*<sub>4</sub>) δ 3.75 (m, 1H), 1.93–1.86 (m, 1H), 1.81–1.75 (m, 3H), 1.65 (m, 2H), 1.27 (m, 3H), 1.18–1.08 (m, 2H). **<sup>13</sup>C NMR** (150 MHz, Methanol-*d*<sub>4</sub>) δ 171.18, 58.88, 40.24, 29.54, 29.28, 27.05, 26.97, 26.77.

**Optical Rotation:**  $[\alpha]^{25}_D = 31$  (*c* = 1.0, MeOH).

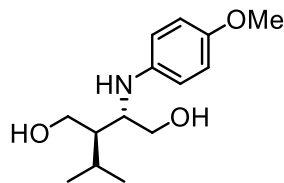

(2R,3S)-2-Isopropyl-3-((4-methoxyphenyl)amino)butane-1,4-diol (**6**)<sup>12</sup>

Yellow oil (86 mg, 85% yield); > 99:1 dr. **<sup>1</sup>H NMR** (600 MHz, Chloroform-*d*) δ 6.75 (d, *J* = 8.9 Hz, 2H), 6.68 (d, *J* = 8.9 Hz, 2H), 3.83–3.80 (m, 1H), 3.78–3.75 (m, 1H), 3.73 (s, 3H), 3.69 (m, 1H), 3.59 (m, 1H), 3.52 (m, 1H), 1.86 (m, 1H), 1.58 (m, 1H), 0.96 (d, *J* = 6.8 Hz, 3H), 0.89 (d, *J* = 6.9 Hz, 3H). **<sup>13</sup>C NMR** (150 MHz, Chloroform-*d*) δ 152.66, 141.69, 141.67, 116.21, 114.87, 62.47, 61.47, 58.60, 55.66, 47.55, 27.38, 21.20, 18.925.

**Optical Rotation:**  $[\alpha]^{25}_D = 26.3$  (*c* = 1.0, MeOH). The ee value was determined by **HPLC analysis:** 96.4:3.6 er, Chiralcel AD-H column, hexane/*i*-PrOH = 93/7, flow rate = 0.5 mL/min, λ = 254 nm, retention time: *t*<sub>major</sub> = 30.5 min, *t*<sub>minor</sub> = 28.1 min.

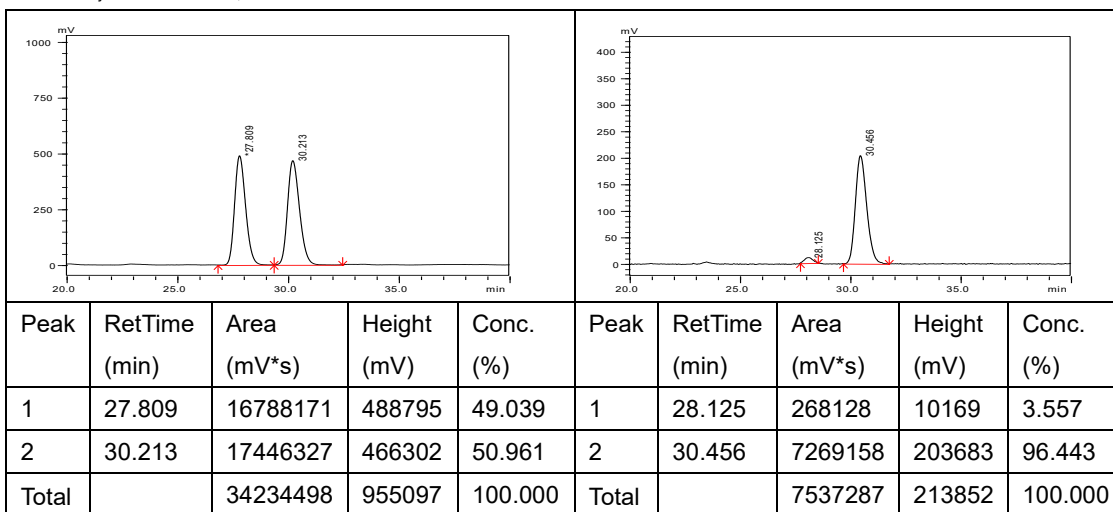

## 5. NMR spectra

### Allyl (4-methoxyphenyl)glycinate (**1e**)

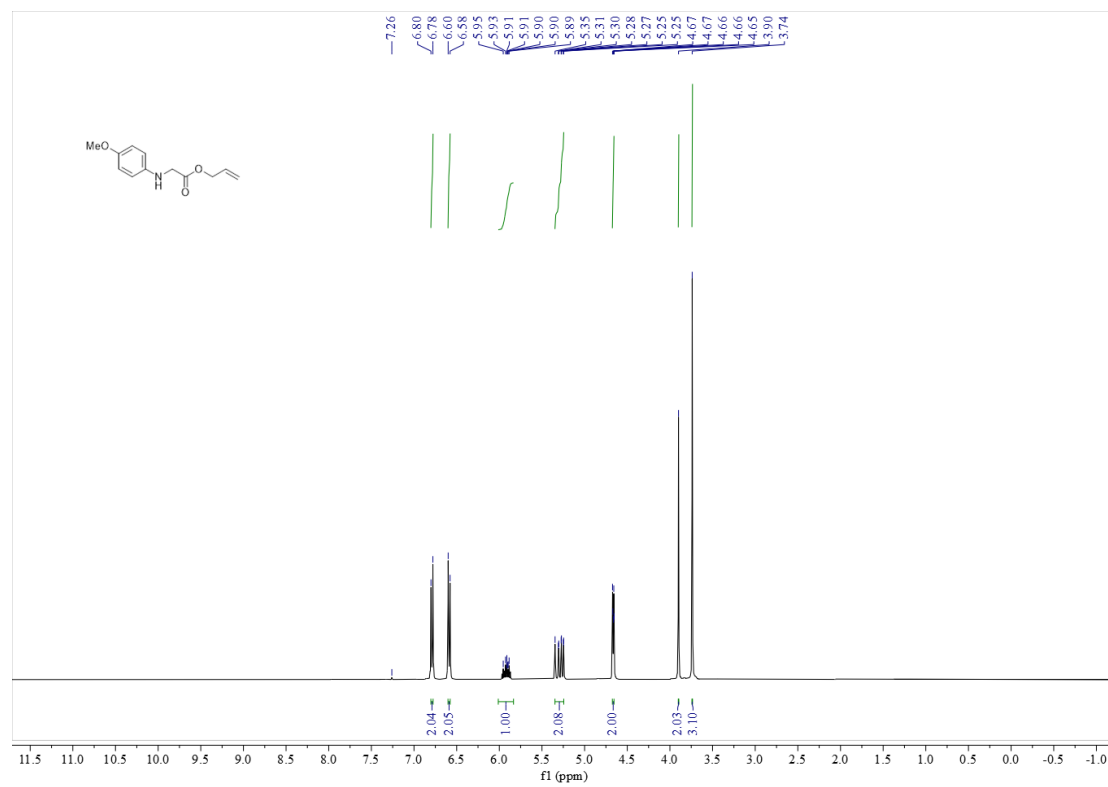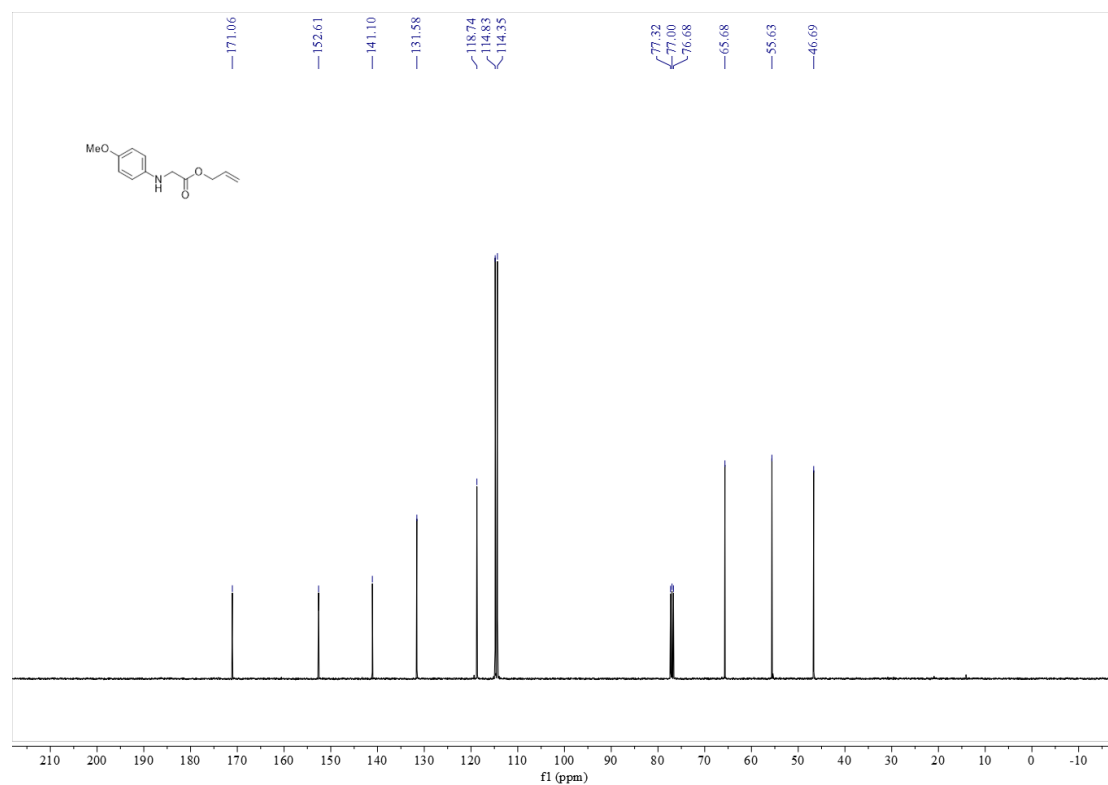

Hex-5-en-1-yl (4-methoxyphenyl)glycinate (**1f**)

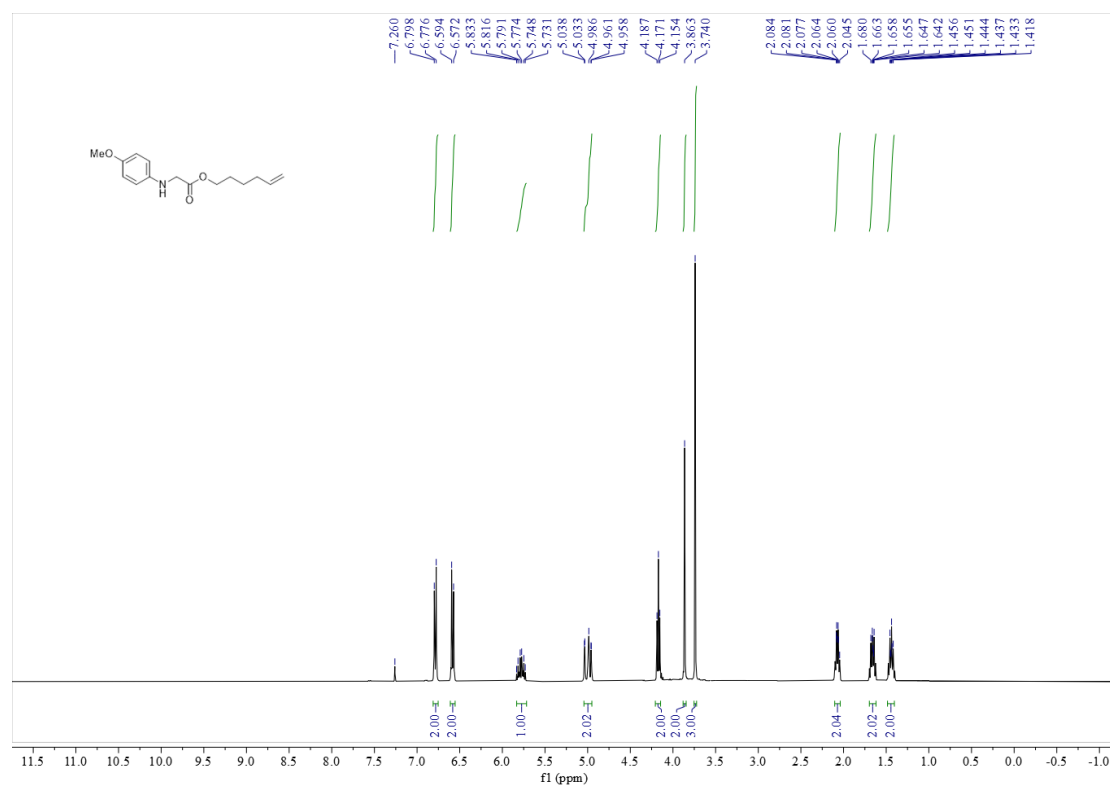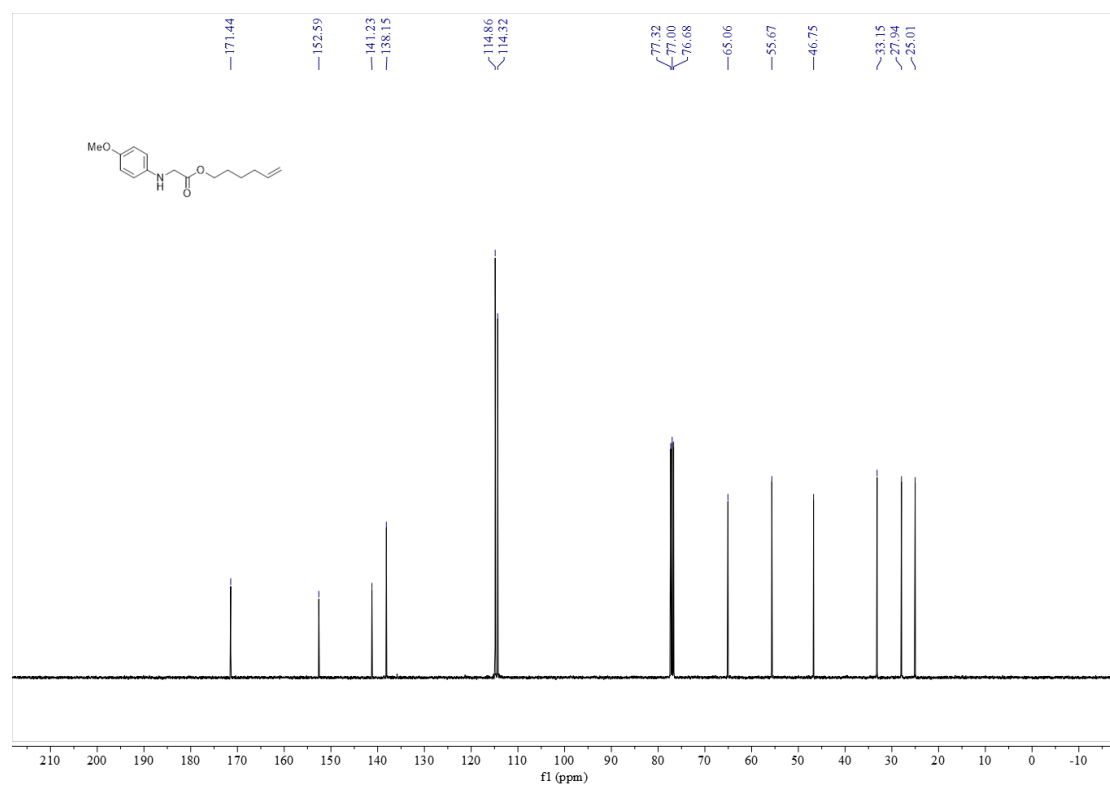

(1S,3S)-Adamantan-1-yl (4-methoxyphenyl)glycinate (**1h**)

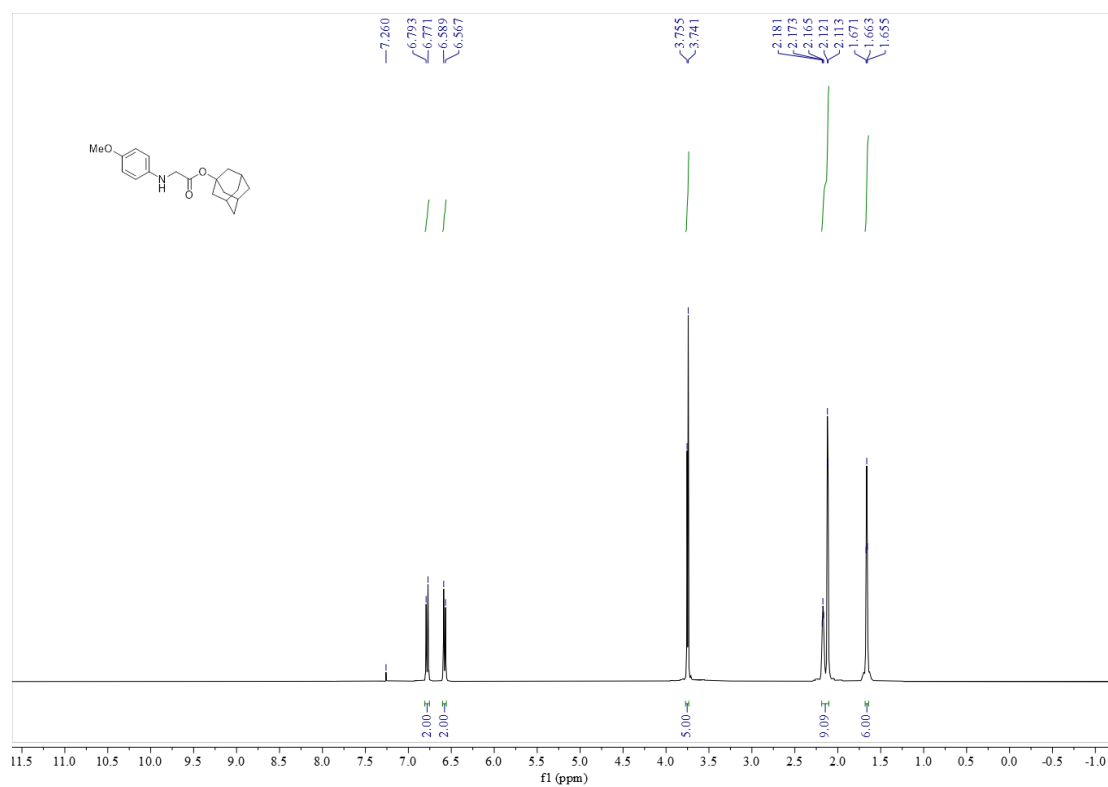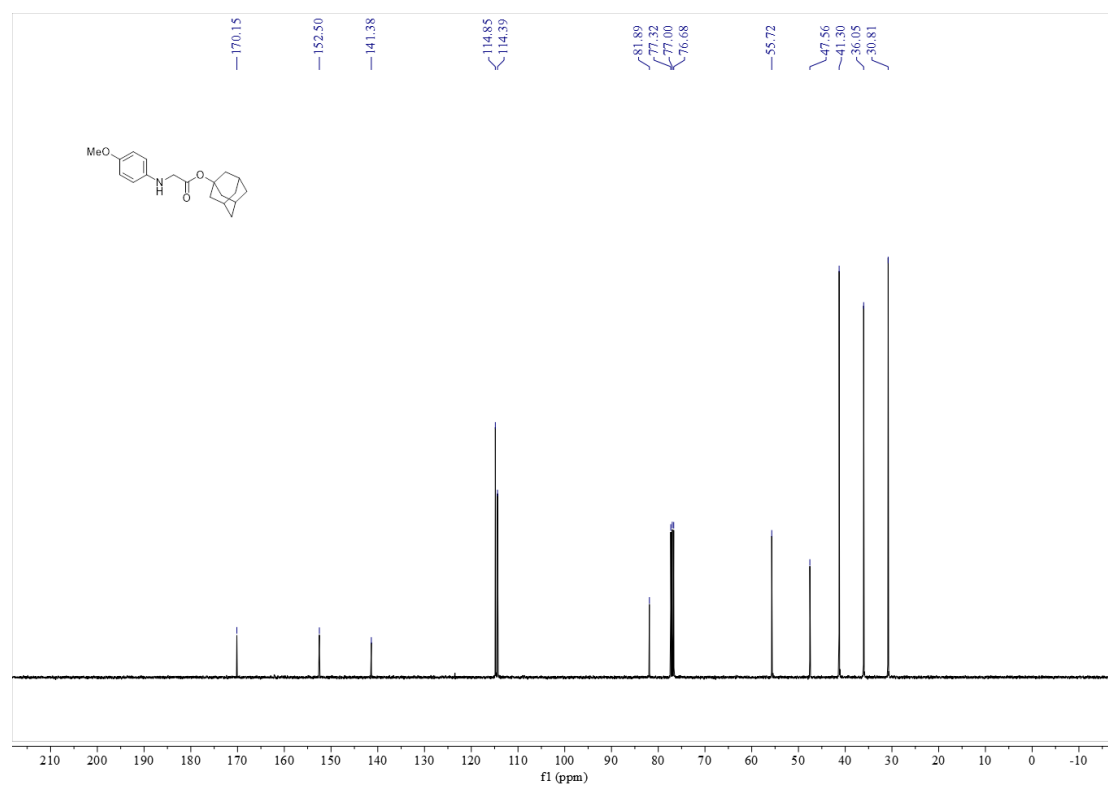

(S)-octan-2-yl (4-methoxyphenyl)glycinate (**1i**)

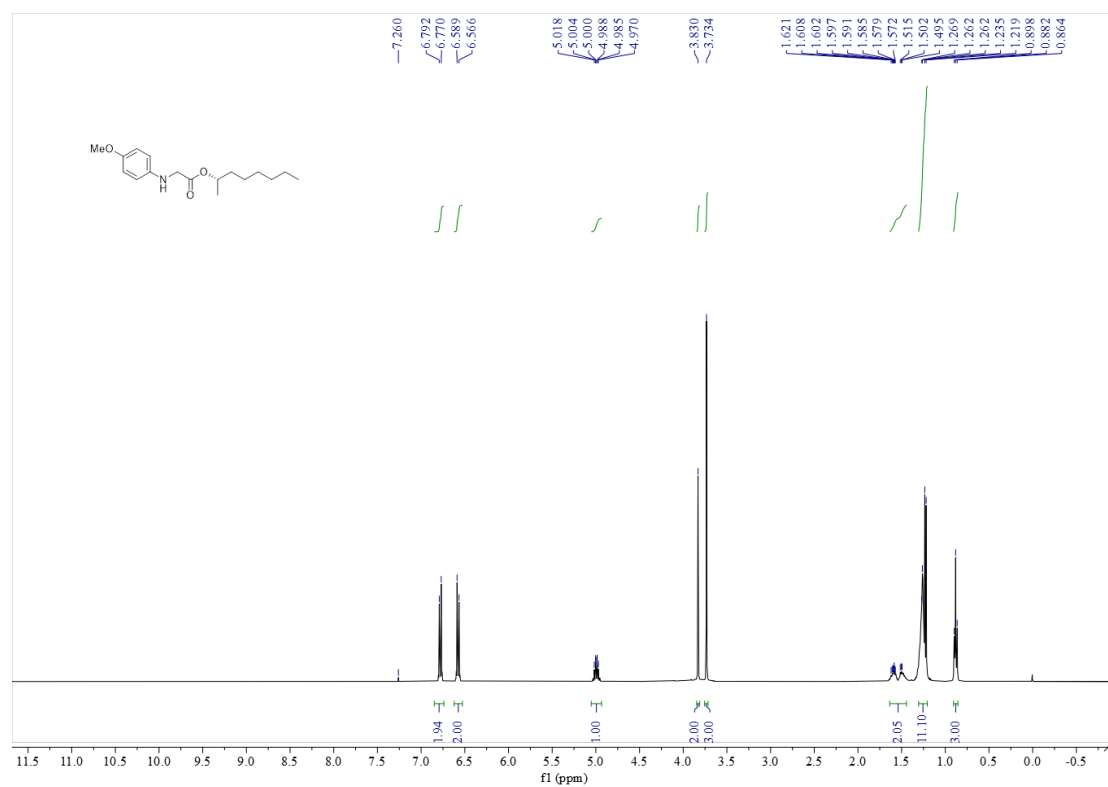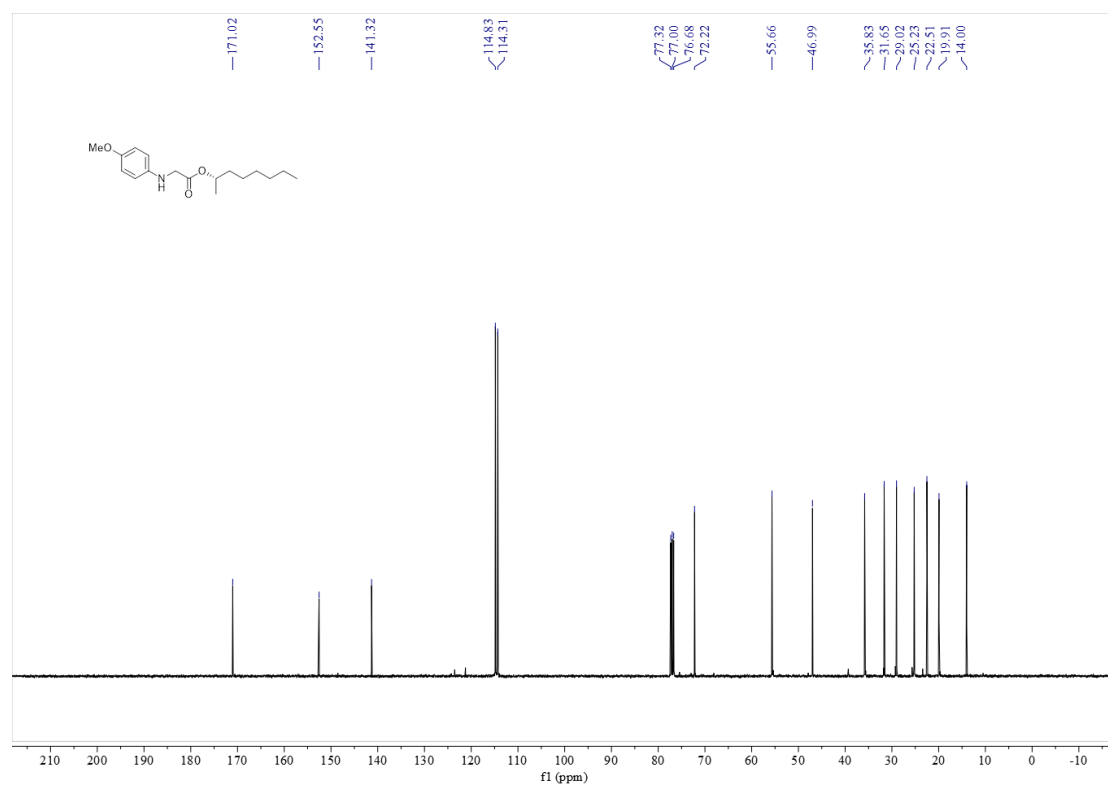

Cinnamyl (4-methoxyphenyl)glycinate (**1n**)

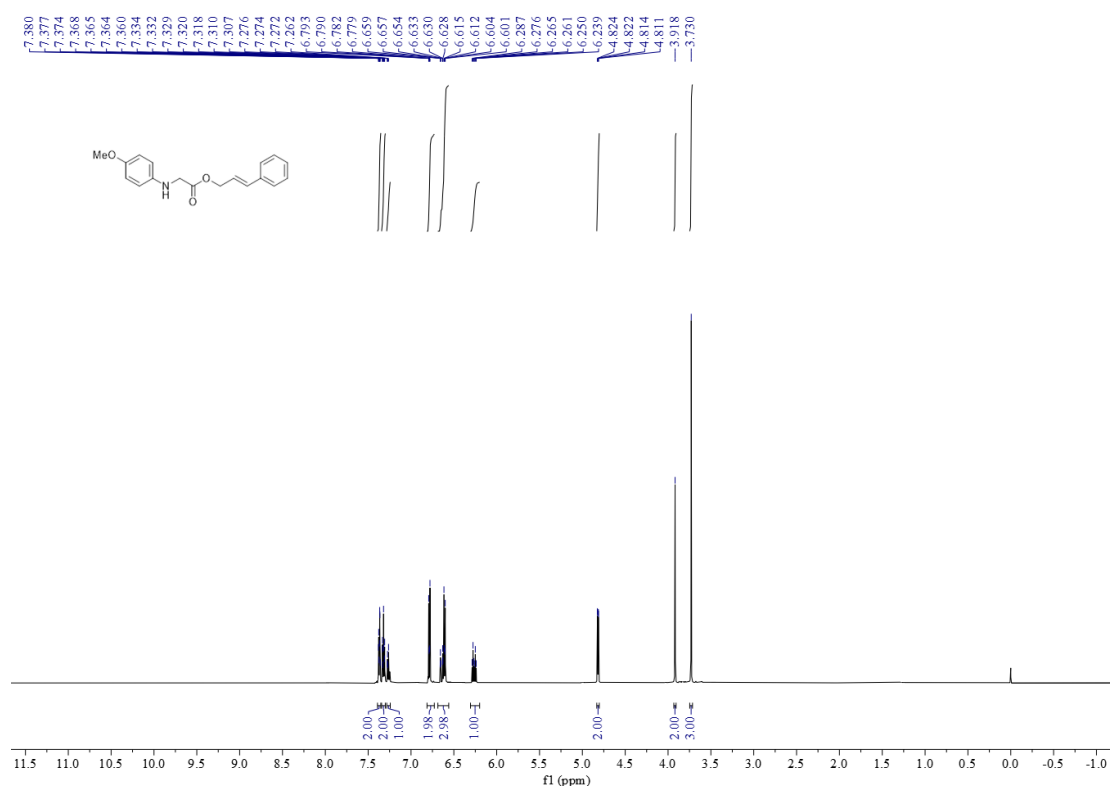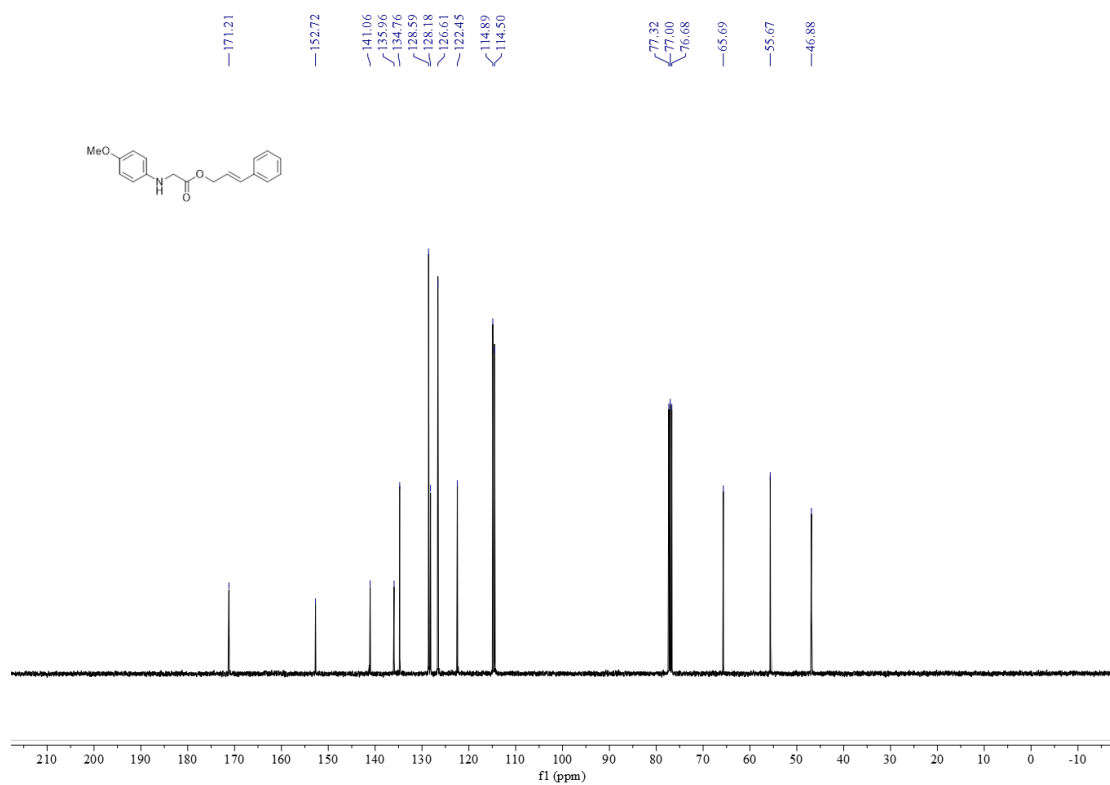



Ethyl 2-(4-(2-((4-methoxyphenyl)amino)acetamido)phenyl)acetate (**1r**)

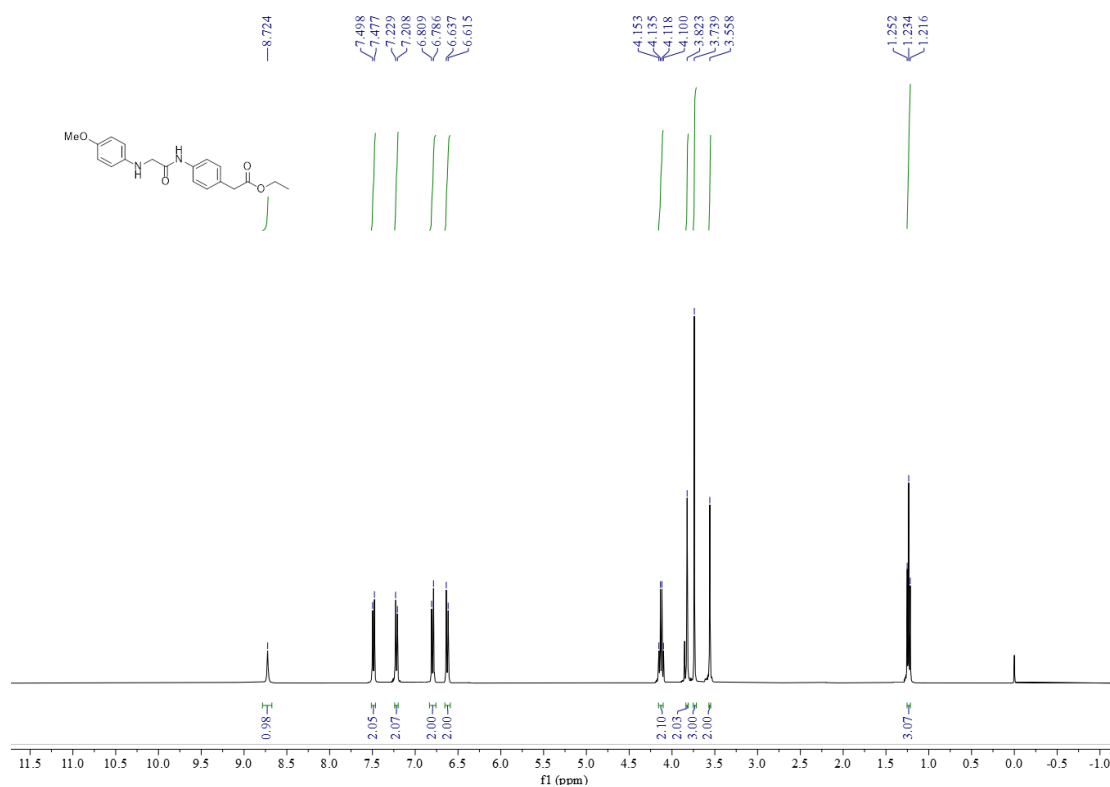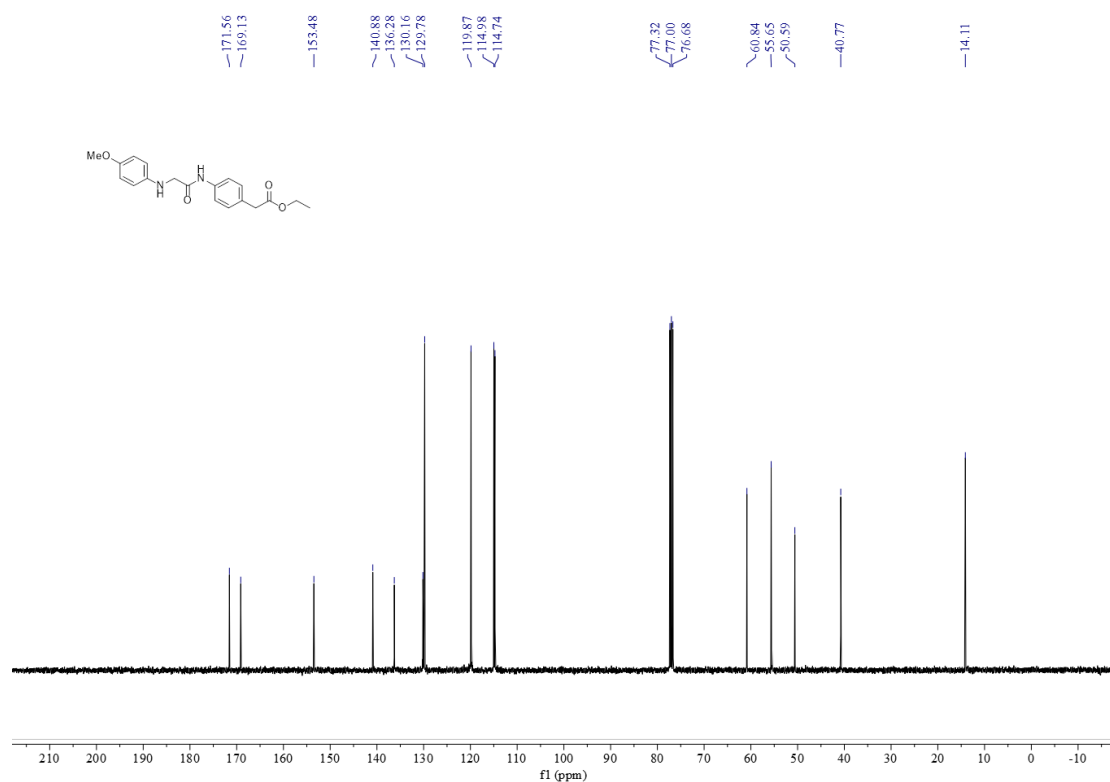

*N*-(2-(5-methoxy-1H-indol-2-yl)ethyl)ethanamide (1t)

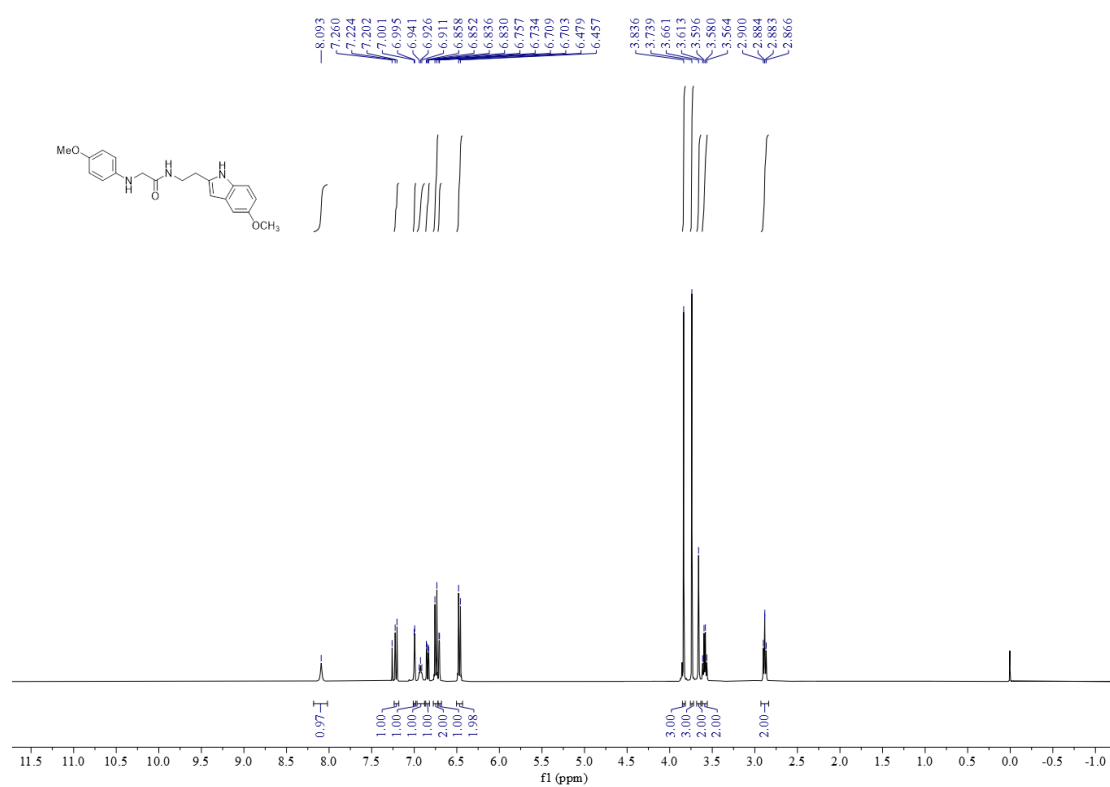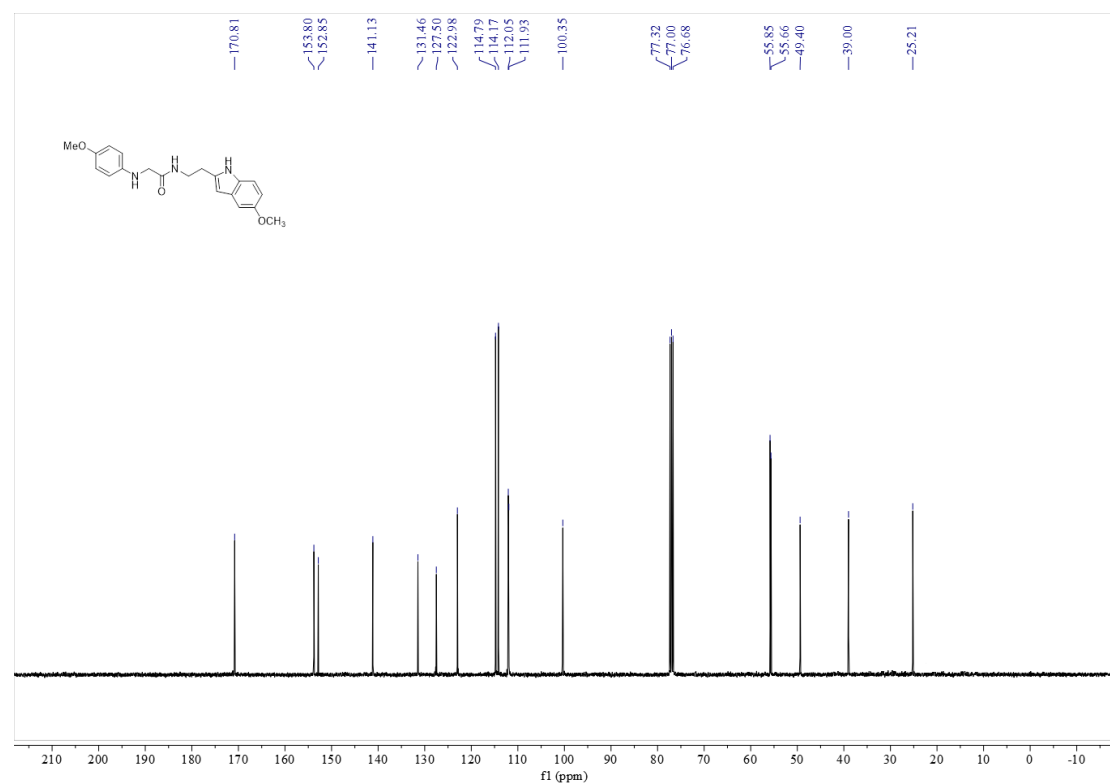

Ethyl (S)-2-((4-methoxyphenyl)amino)-2-((R)-2-oxocyclohexyl)acetate (**3aa**)

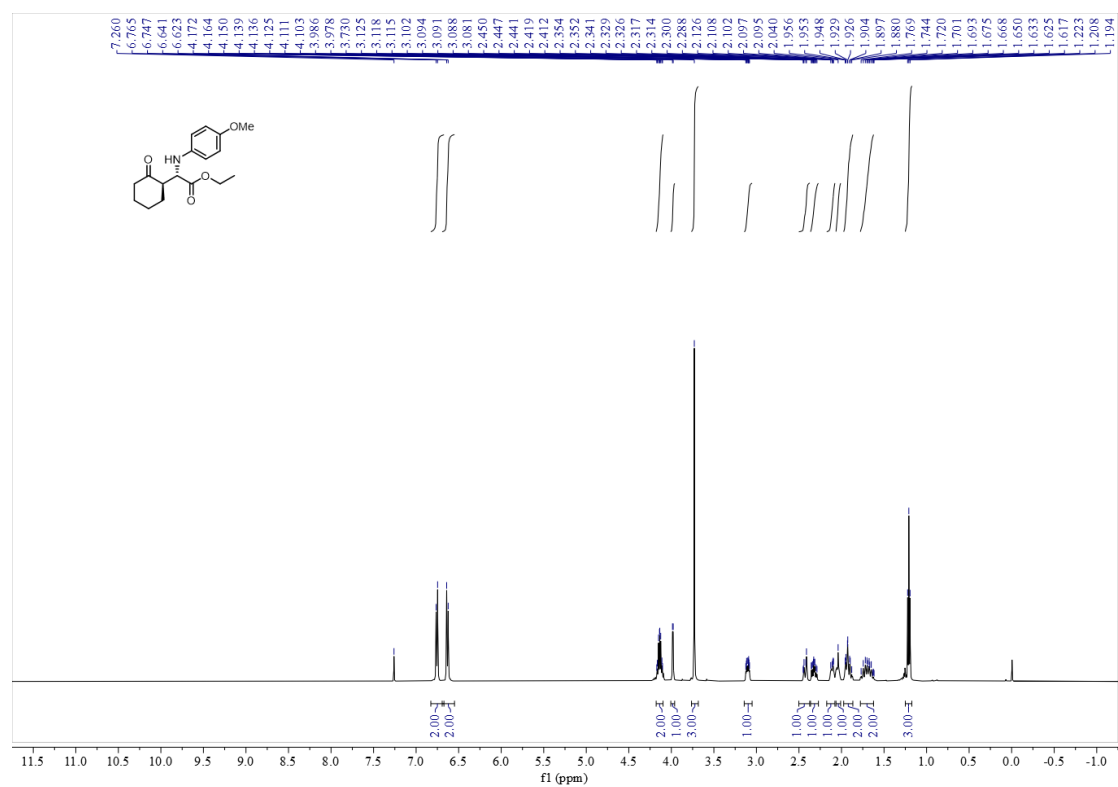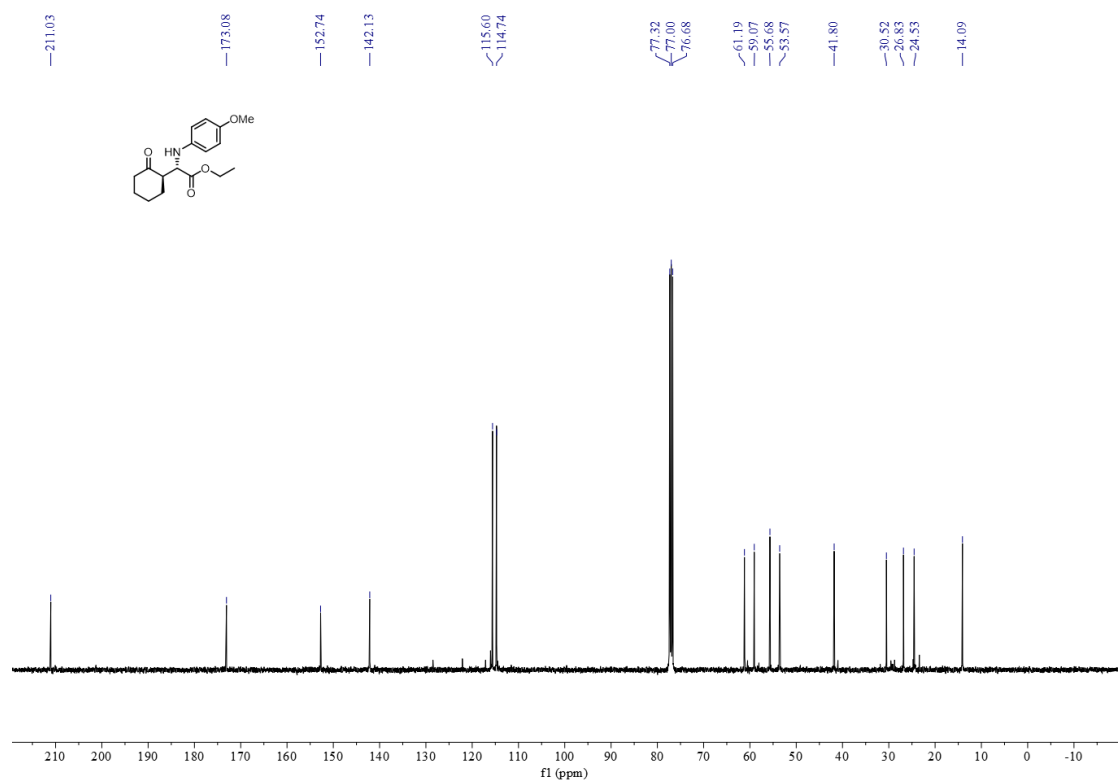

Methyl (S)-2-((4-methoxyphenyl)amino)-2-((R)-2-oxocyclohexyl)acetate (**3ba**)

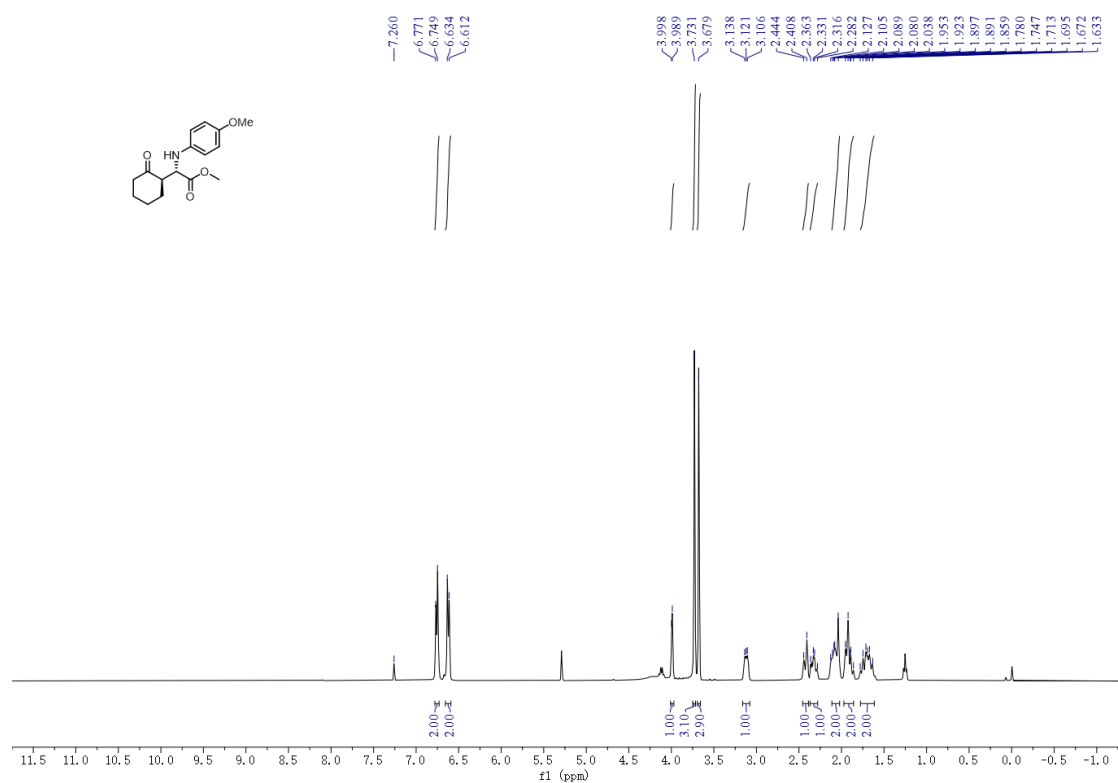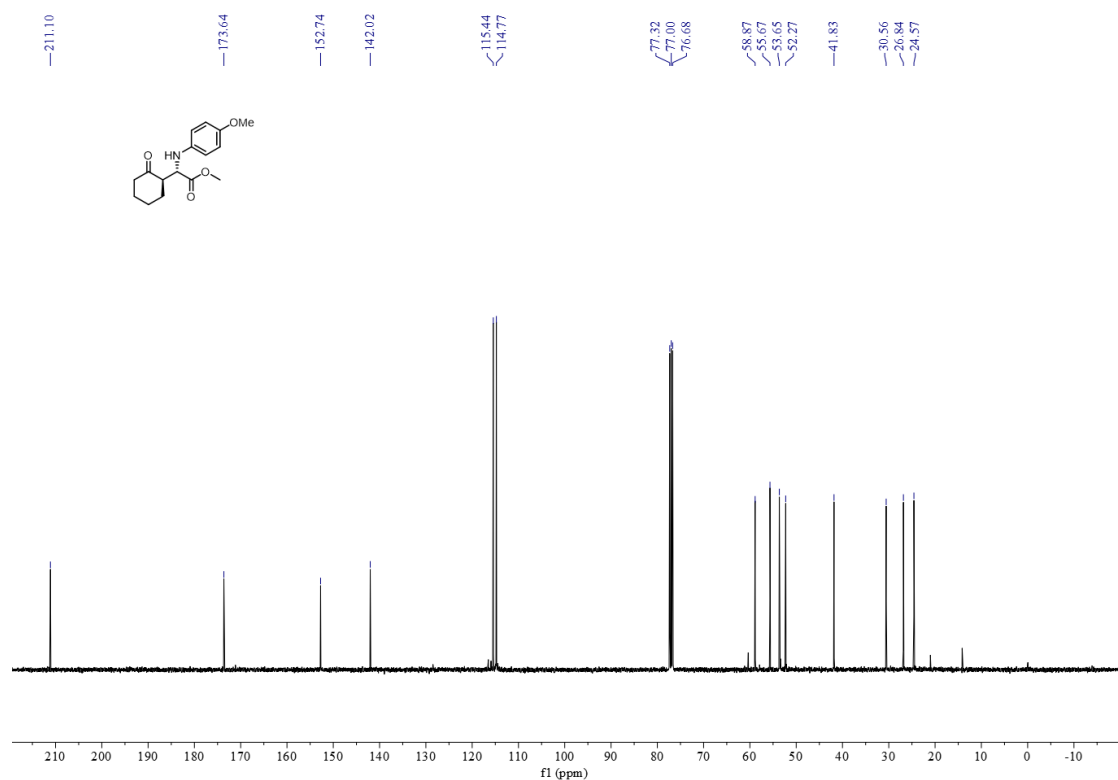

Isopropyl (S)-2-((4-methoxyphenyl)amino)-2-((R)-2-oxocyclohexyl)acetate (**3ca**)

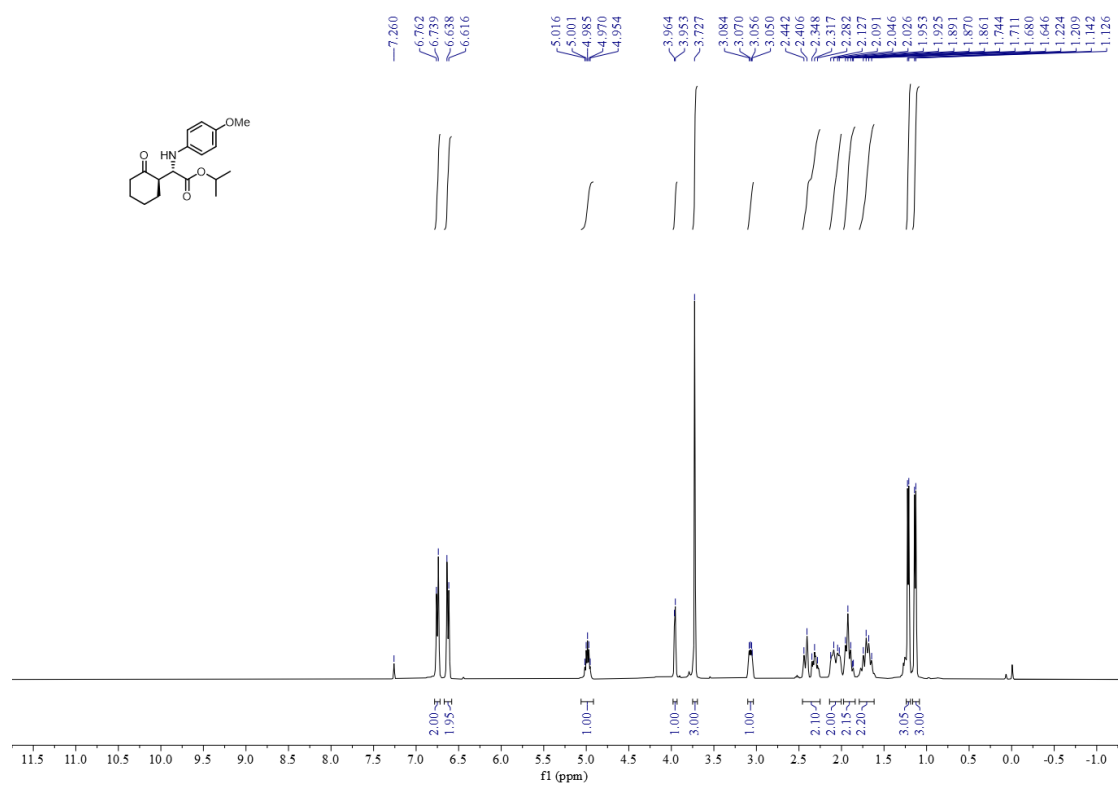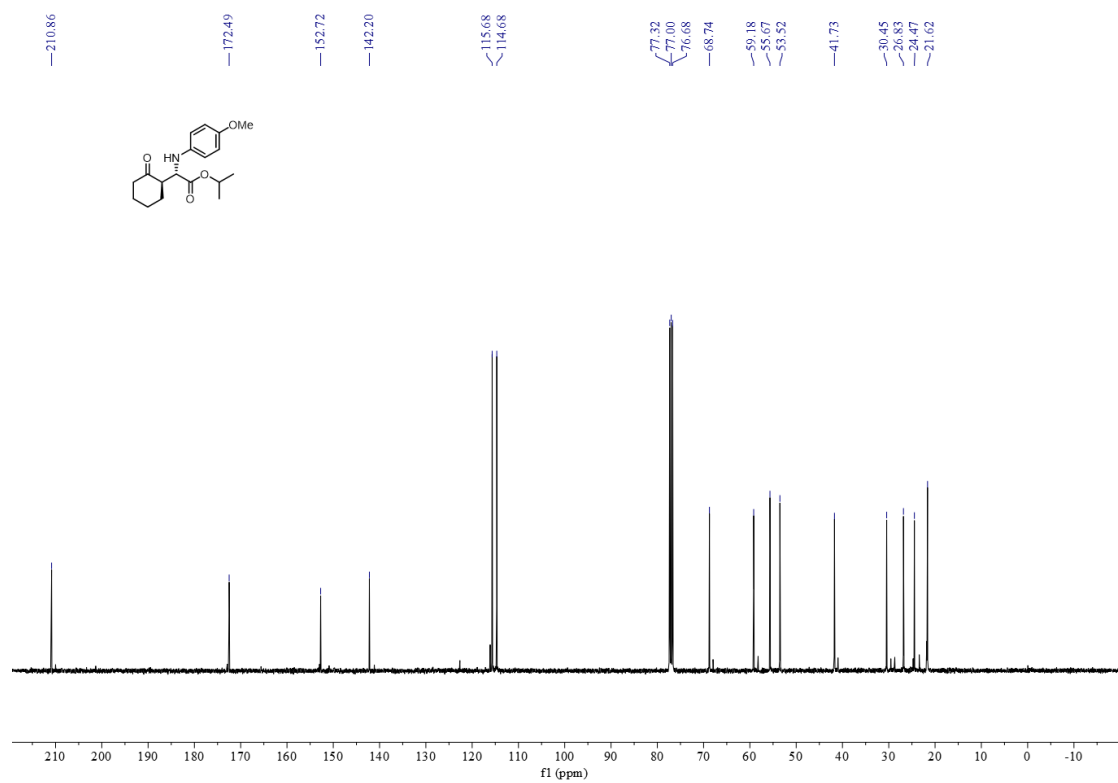

Tert-butyl (S)-2-((4-methoxyphenyl)amino)-2-((R)-2-oxocyclohexyl)acetate (**3da**)

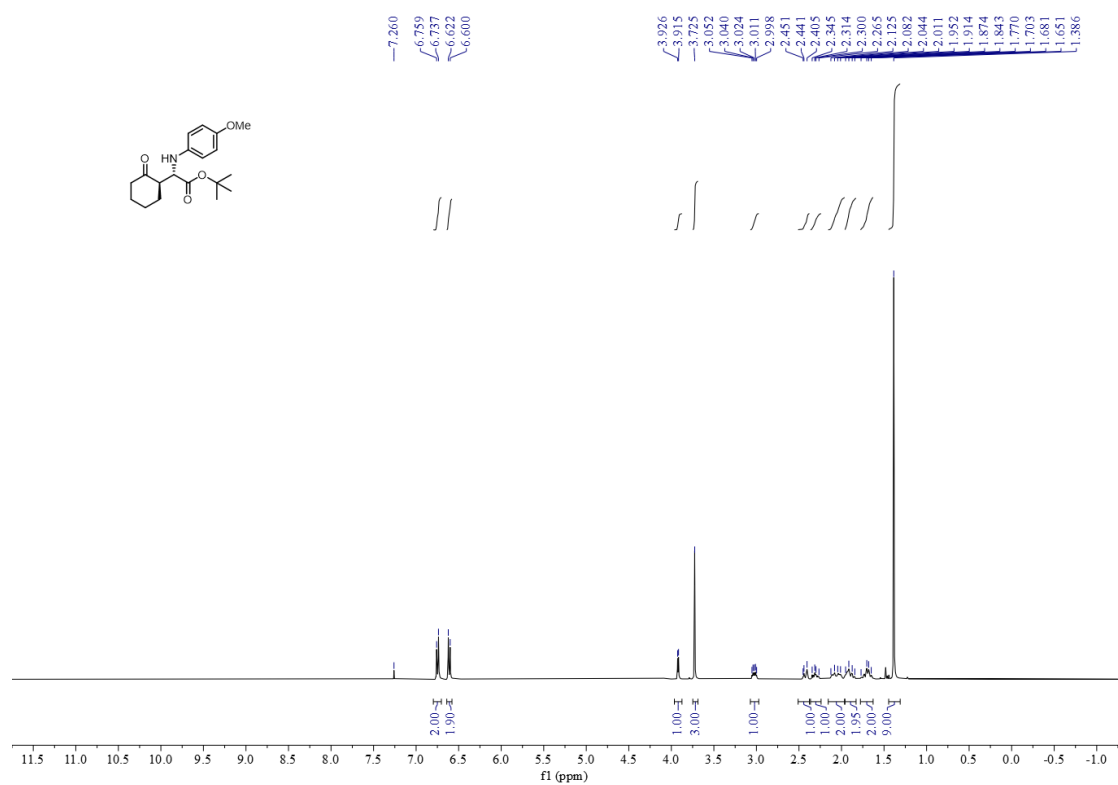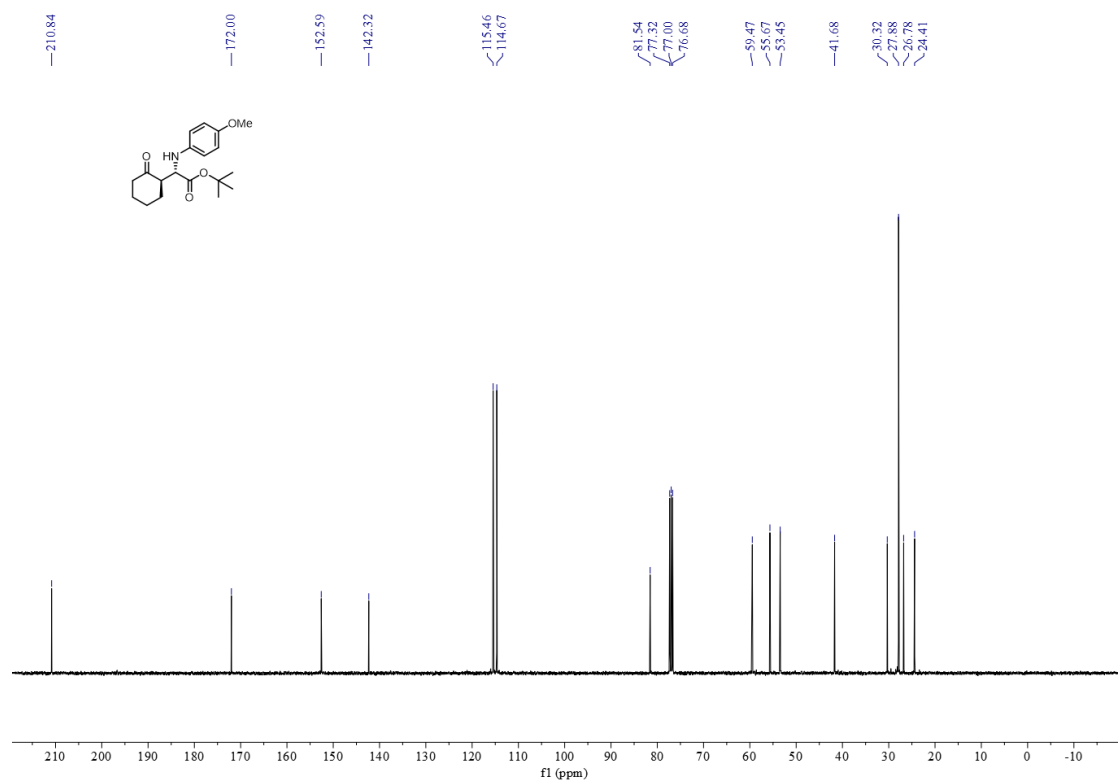

Allyl (S)-2-((4-methoxyphenyl)amino)-2-((R)-2-oxocyclohexyl)acetate (**3ea**)

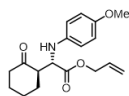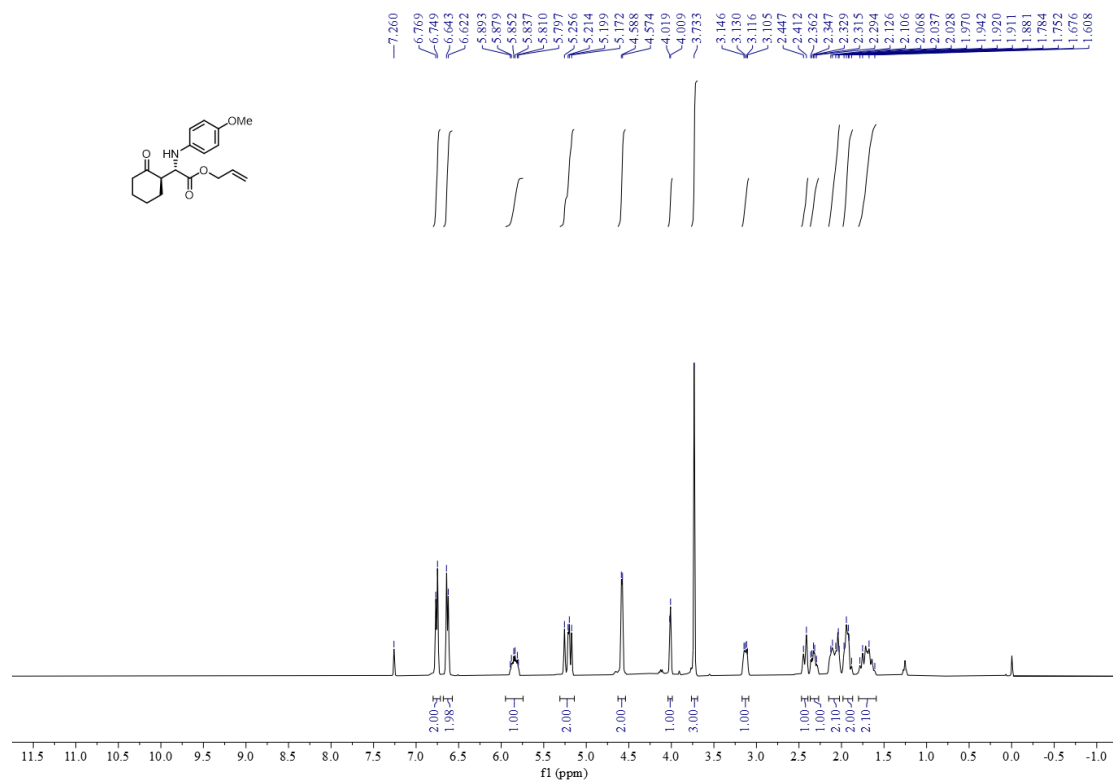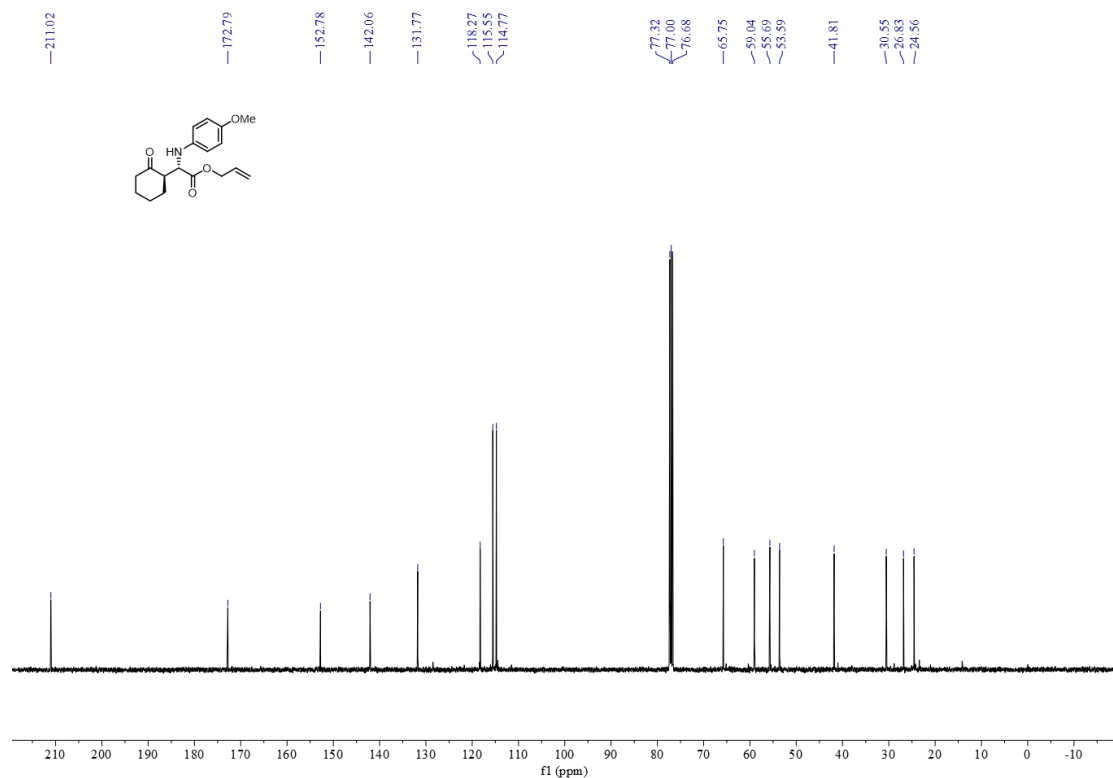

Allyl (S)-2-((4-methoxyphenyl)amino)-2-((R)-2-oxocyclohexyl)acetate (**3fa**)

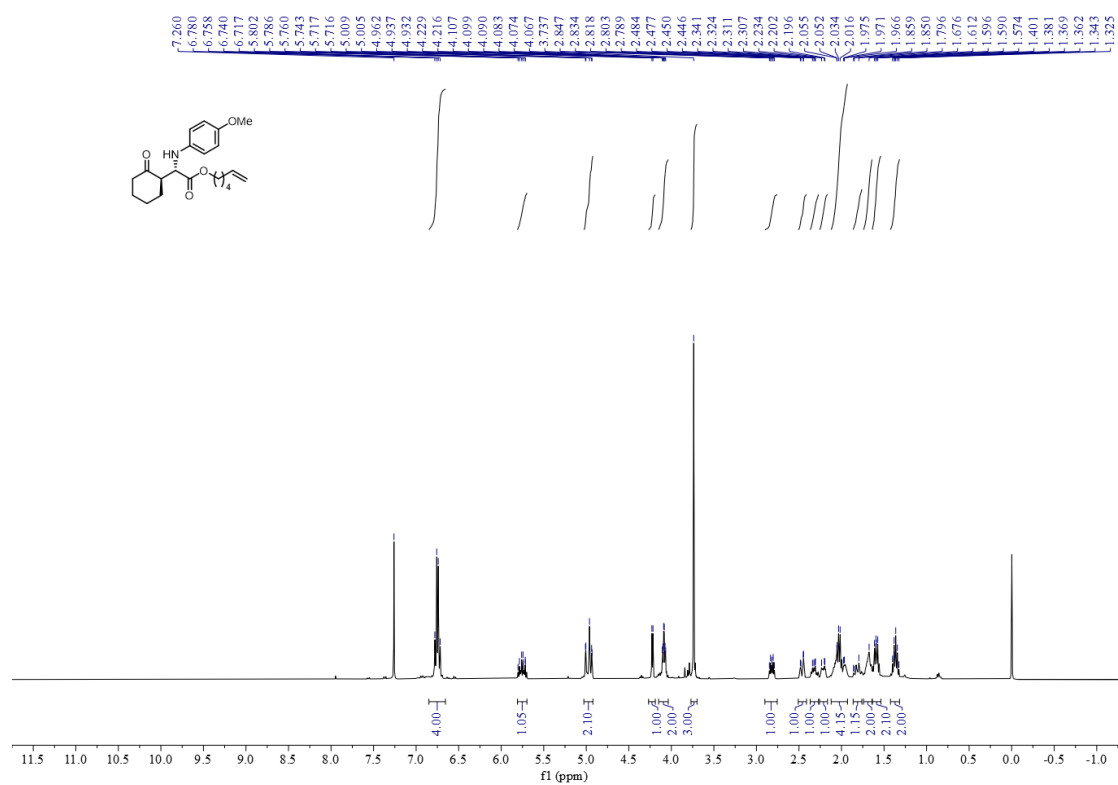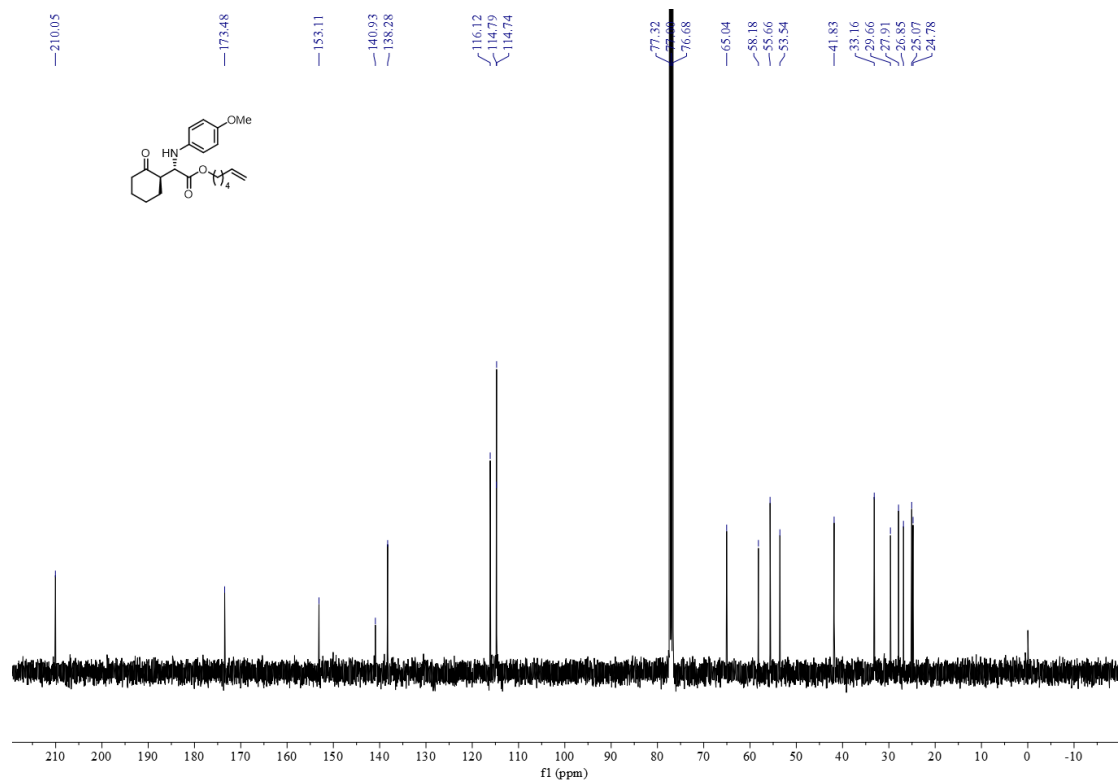



Benzyl (S)-2-((4-methoxyphenyl)amino)-2-((R)-2-oxocyclohexyl)acetate (**3ga**)

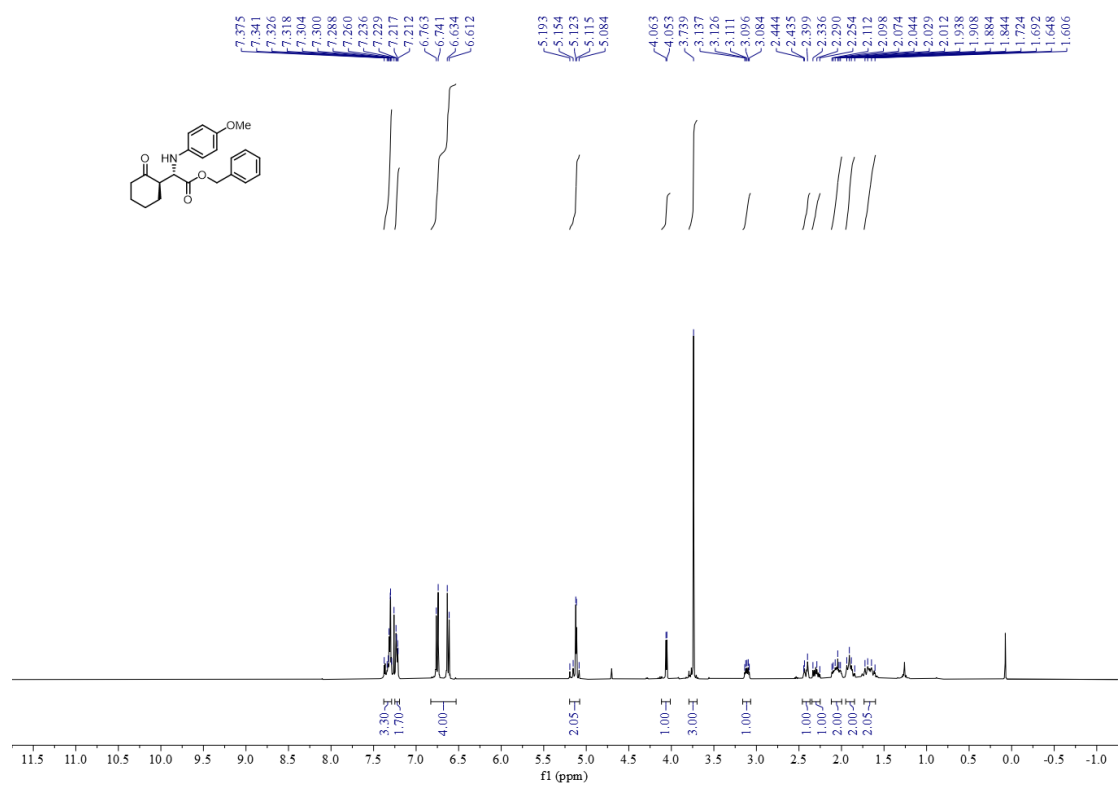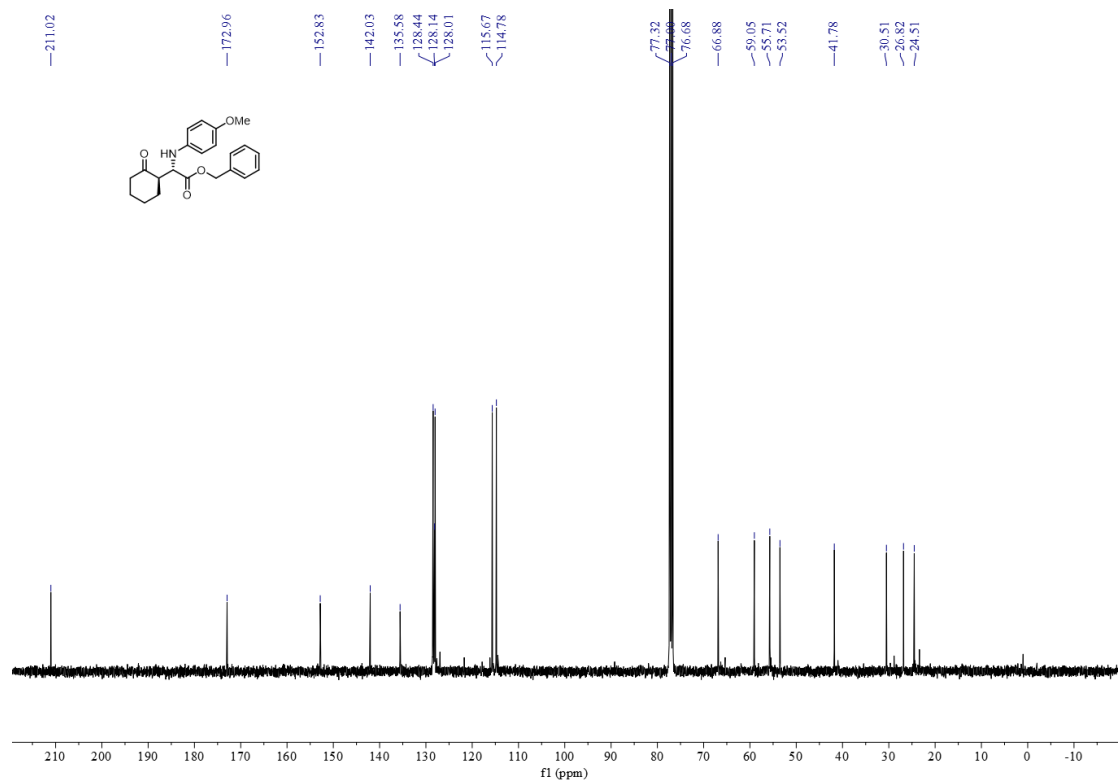

(1S,3R)-Adamantan-1-yl (2S)-2-((4-methoxyphenyl)amino)-2-((R)-2-oxocyclohexyl)aceta-te (**3ha**)

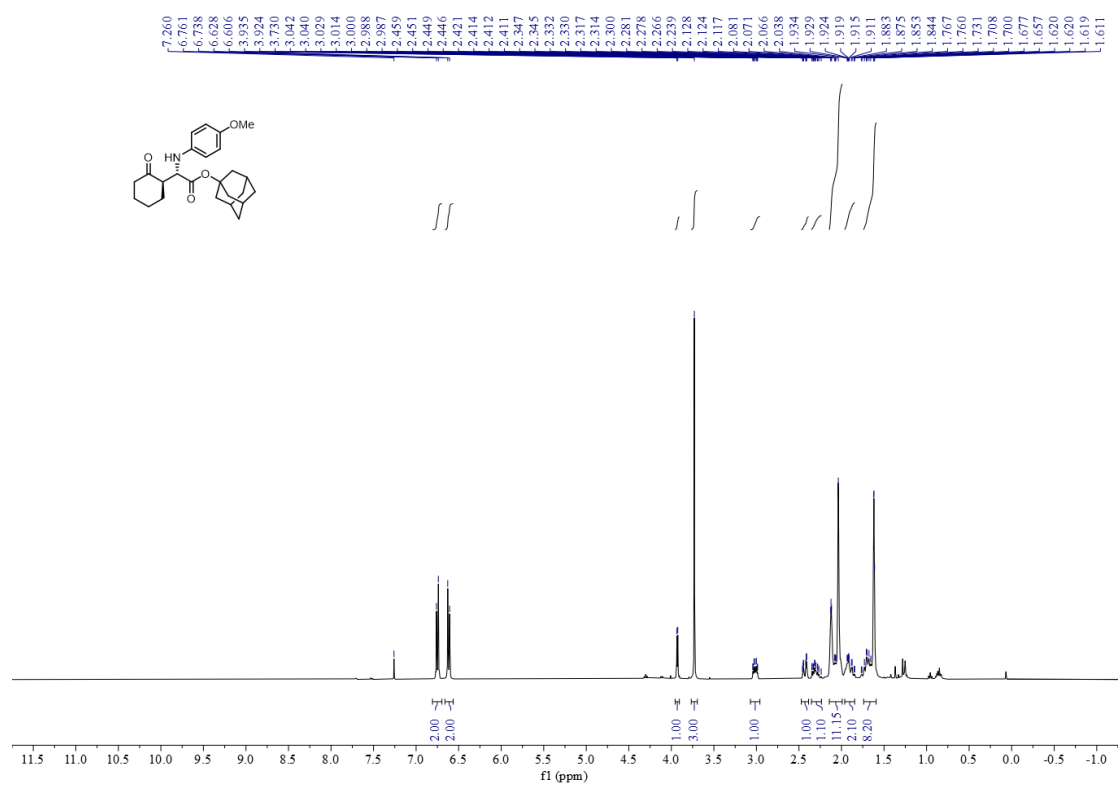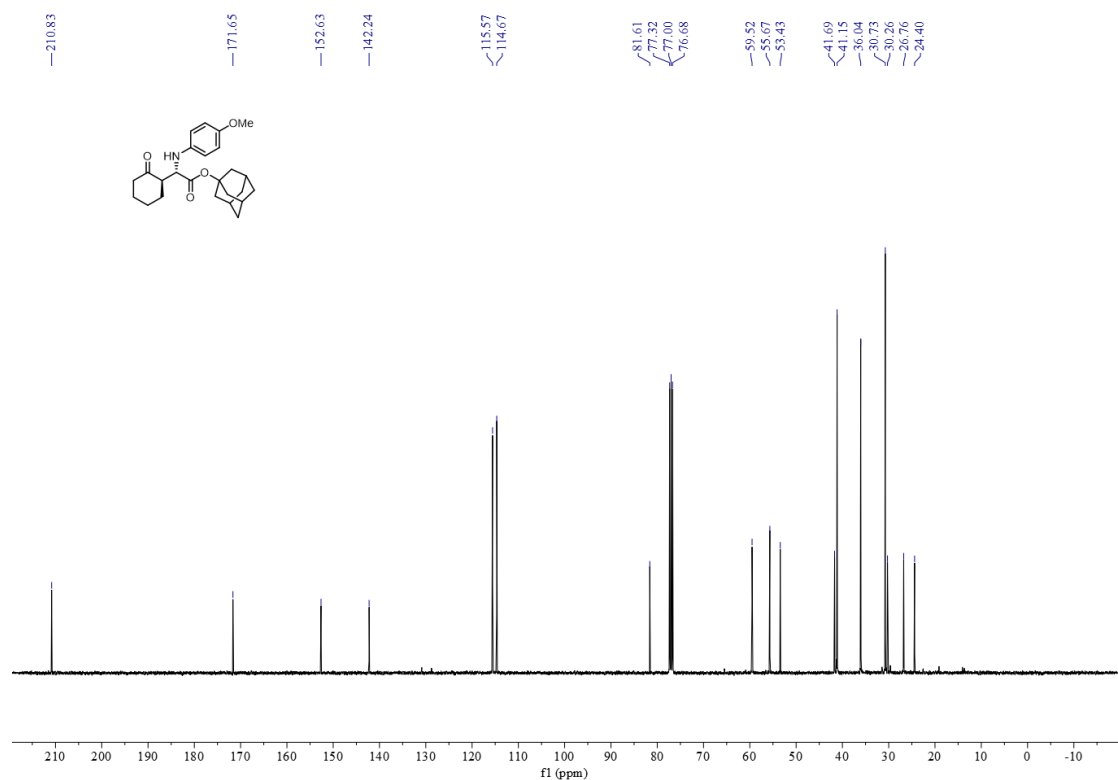

(S)-Octan-2-yl (S)-2-((4-methoxyphenyl)amino)-2-((R)-2-oxocyclohexyl)acetate (**3ia**)

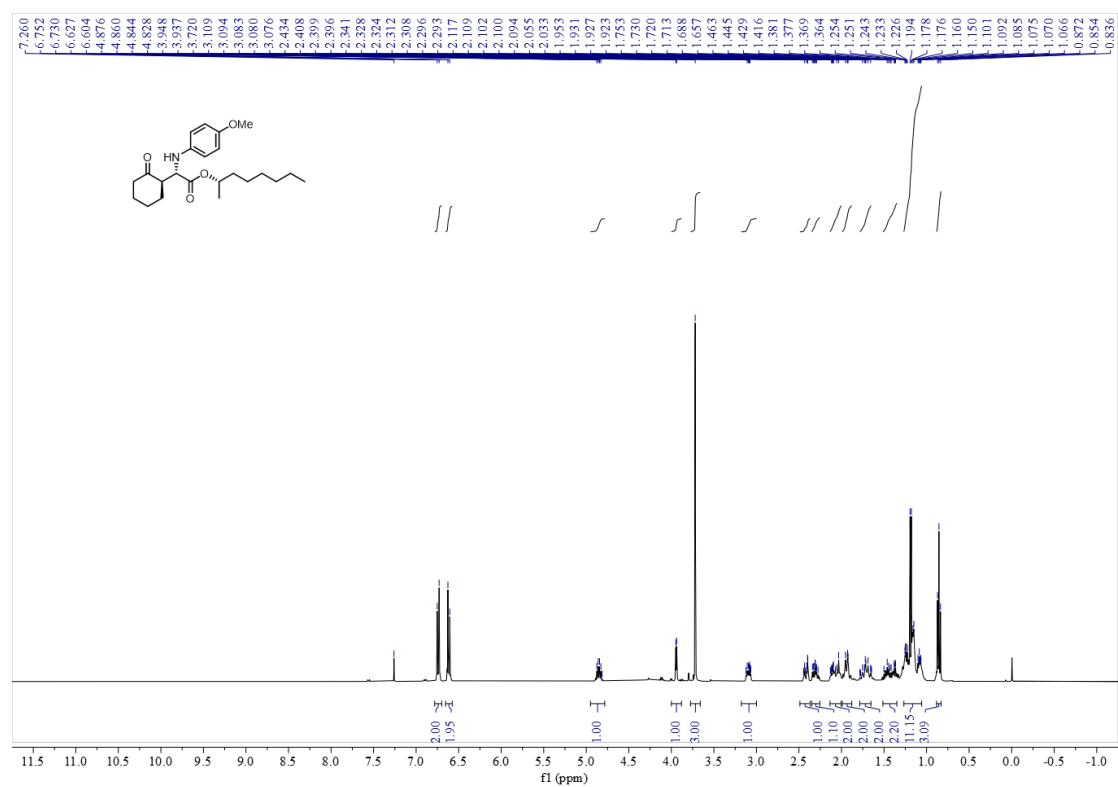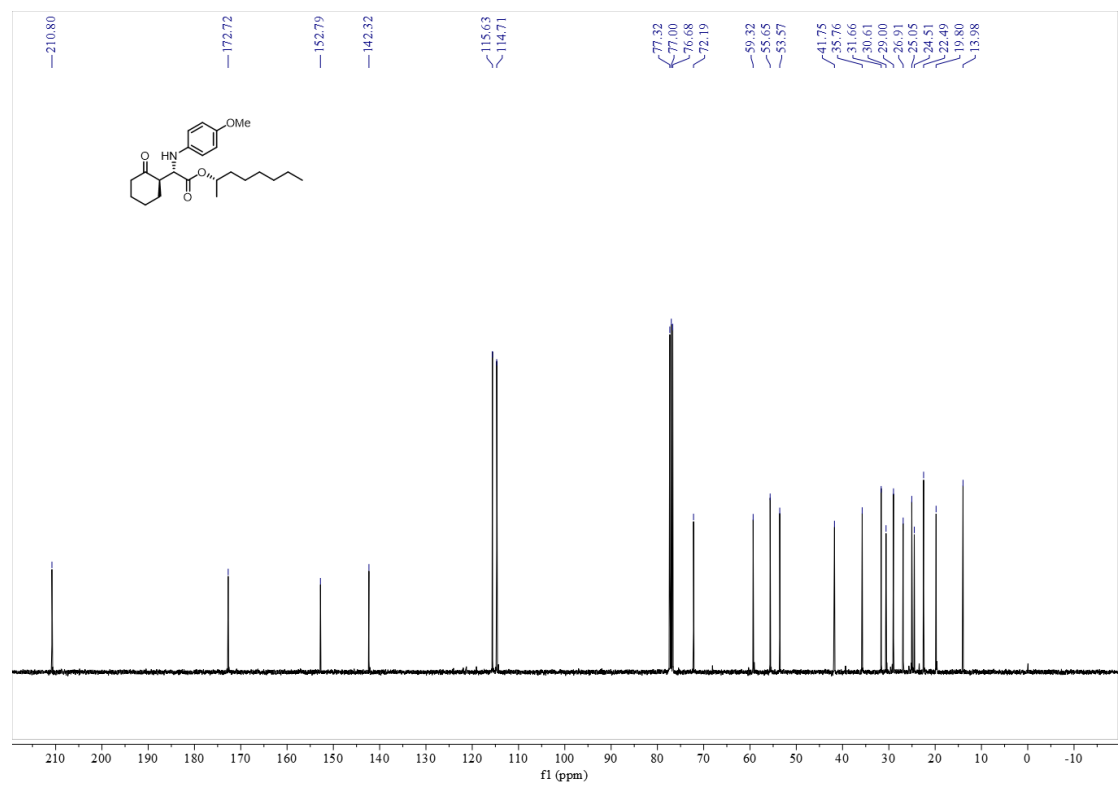

Methyl (S)-2-((R)-2-oxocyclohexyl)-2-(p-tolylamino)acetate (**3ja**)

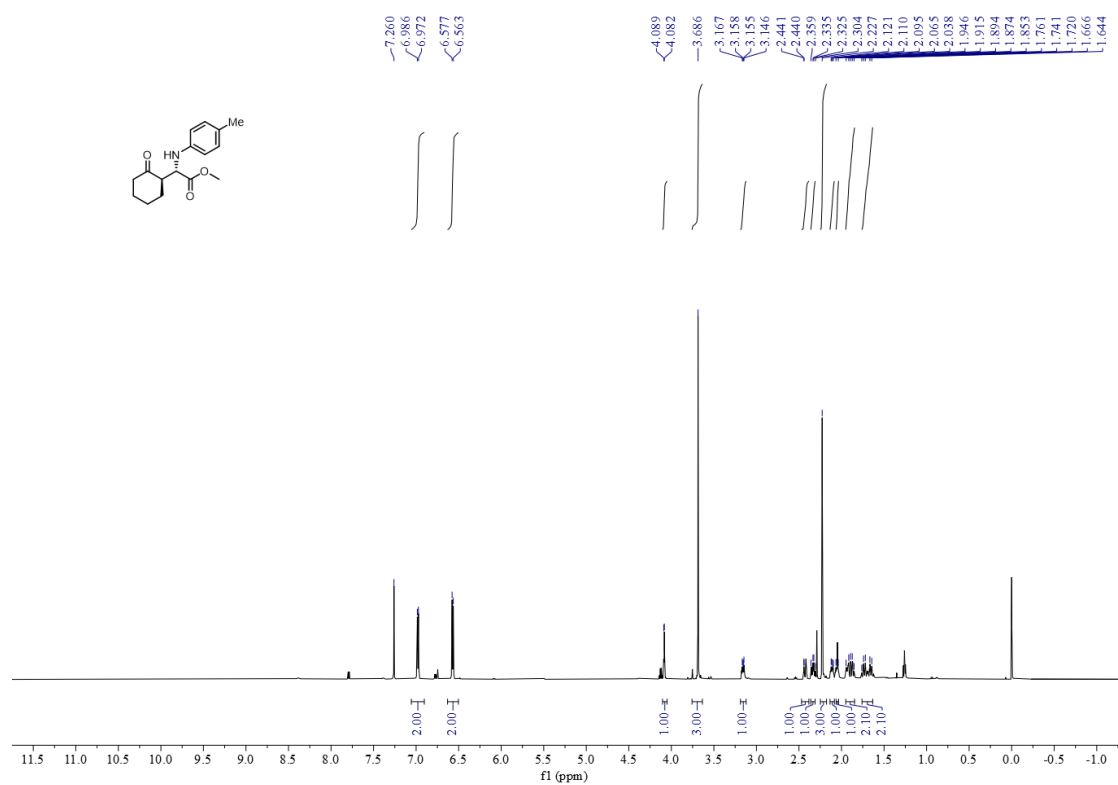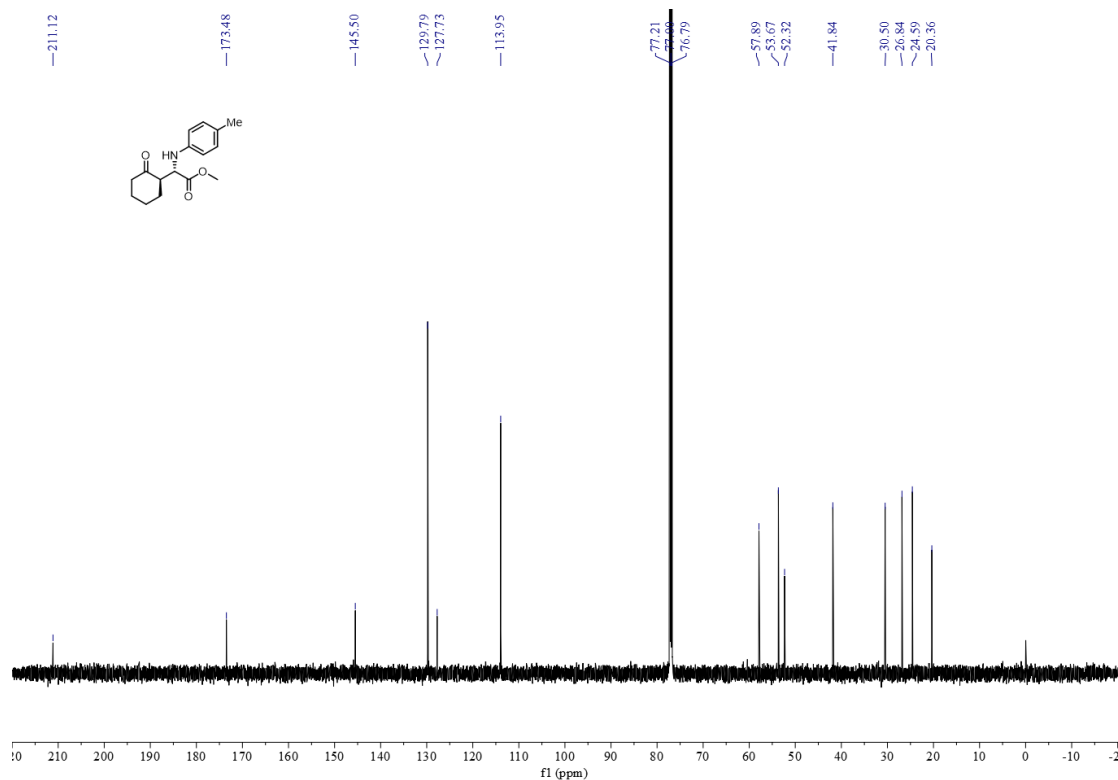

Ethyl (S)-2-((R)-2-oxocyclohexyl)-2-(p-tolylamino)acetate (**3ka**)

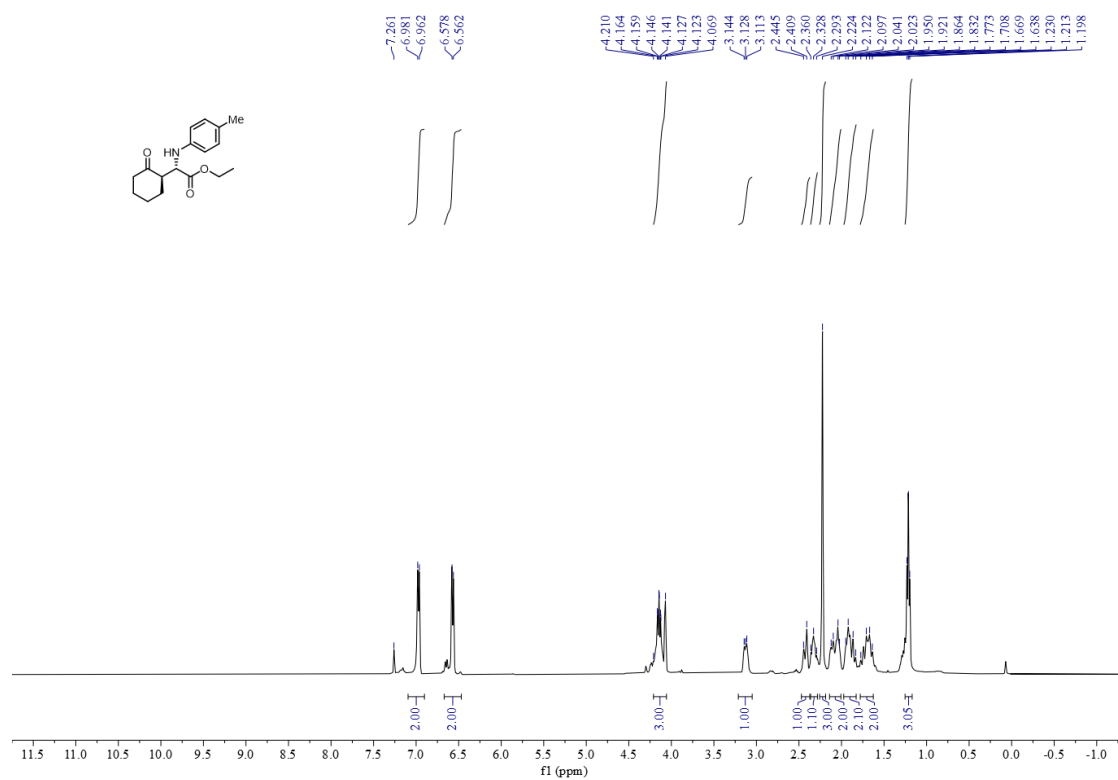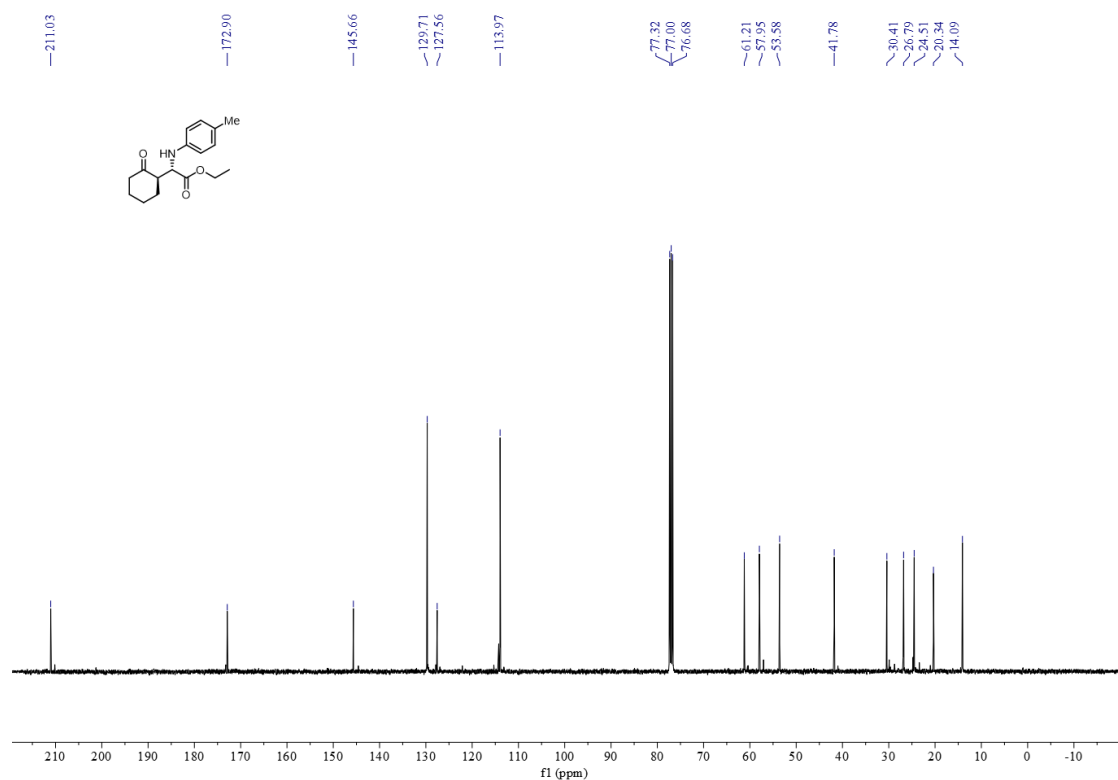

Ethyl (S)-2-((4-bromophenyl)amino)-2-((R)-2-oxocyclohexyl)acetate (**31a**)

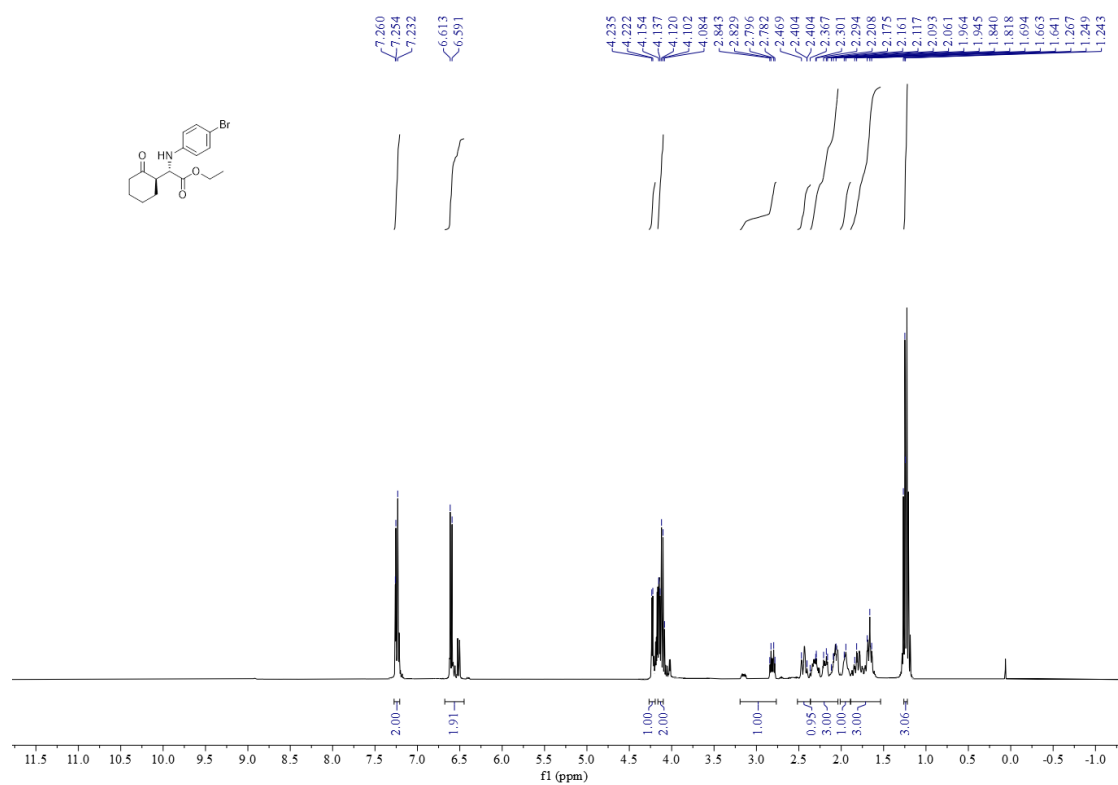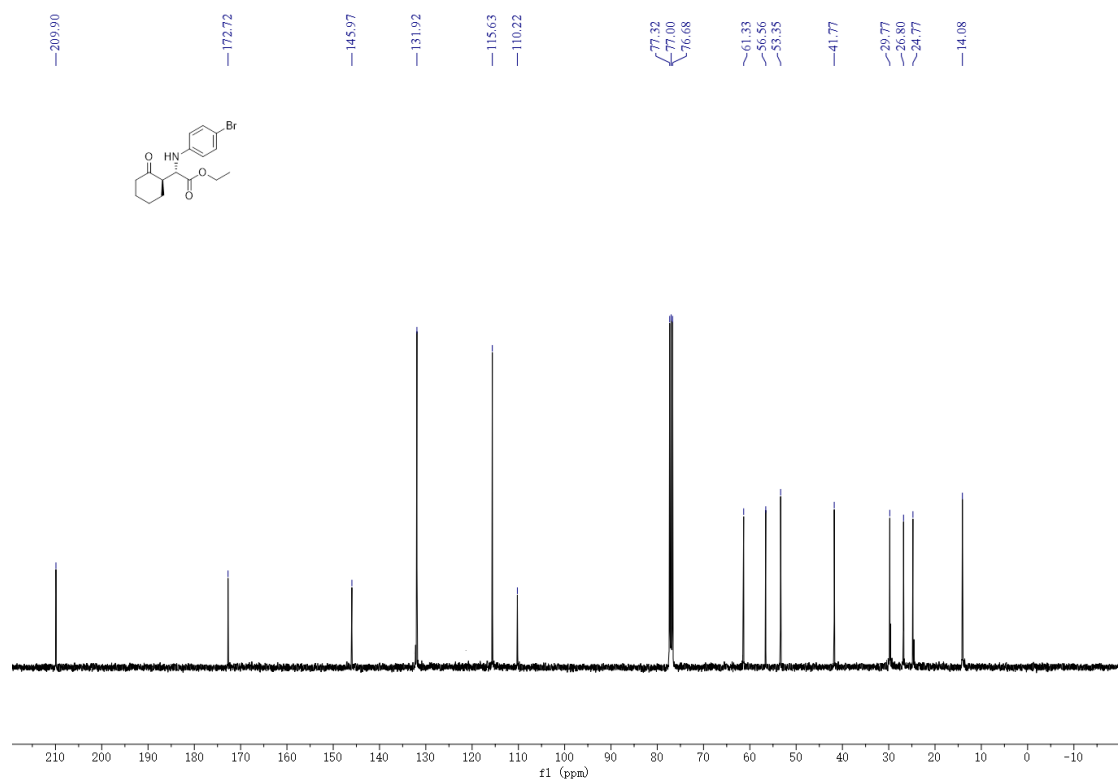

Ethyl (S)-2-((4-chlorophenyl)amino)-2-((R)-2-oxocyclohexyl)acetate (**3ma**)

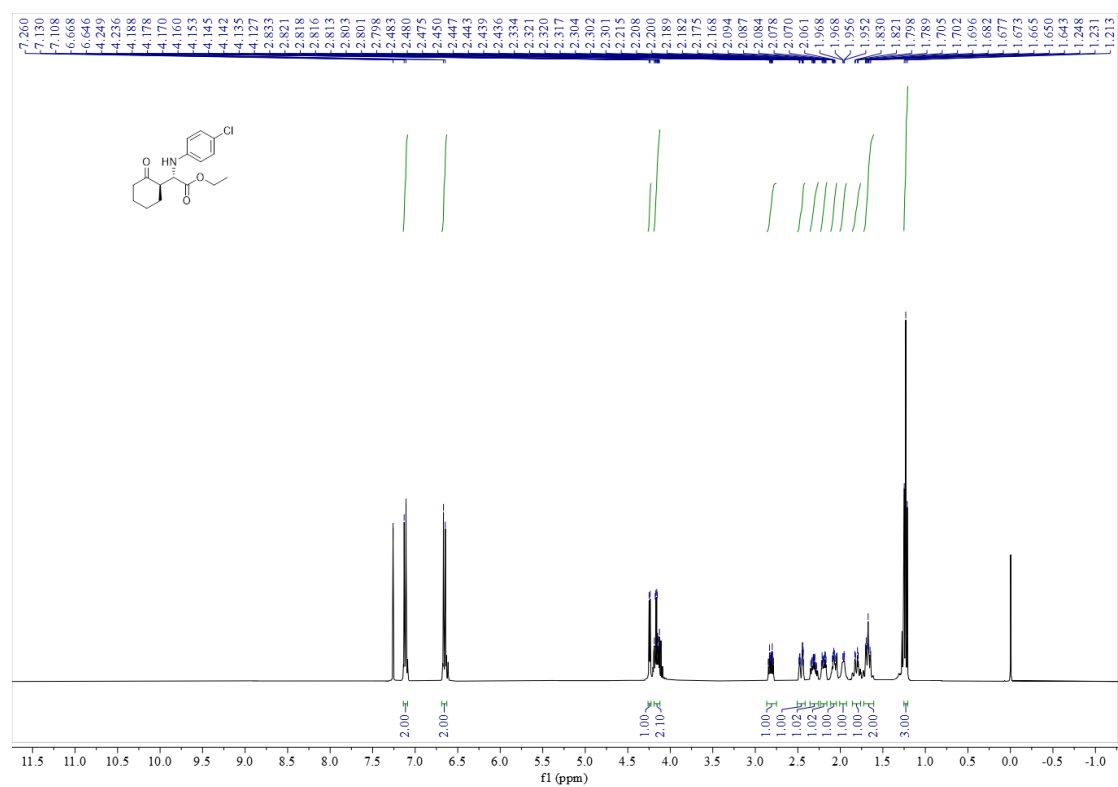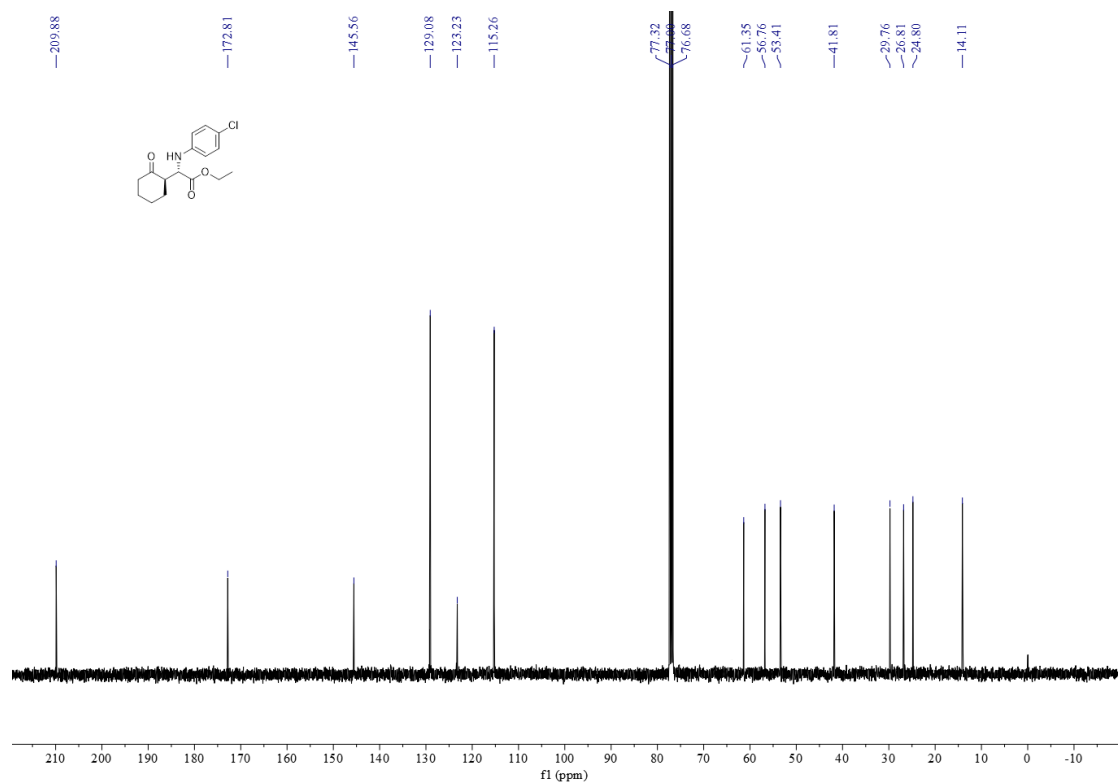

Cinnamyl (S)-2-((4-methoxyphenyl)amino)-2-((R)-2-oxocyclohexyl)acetate (**3na**)

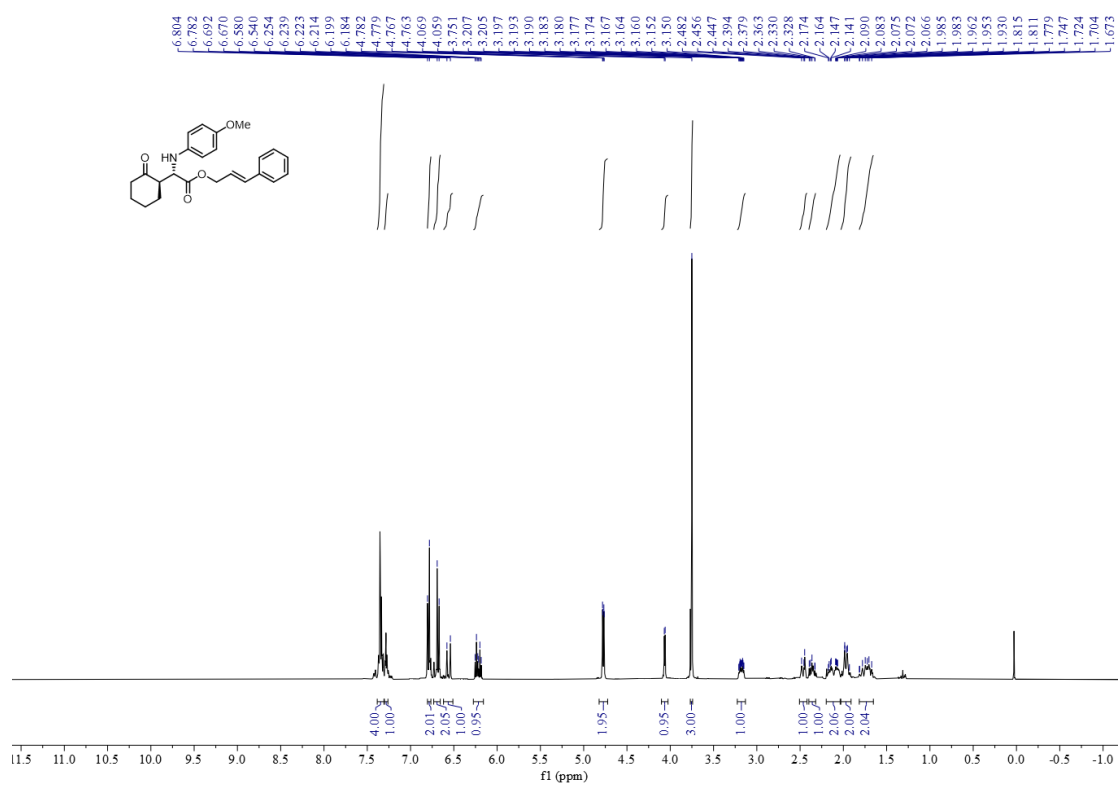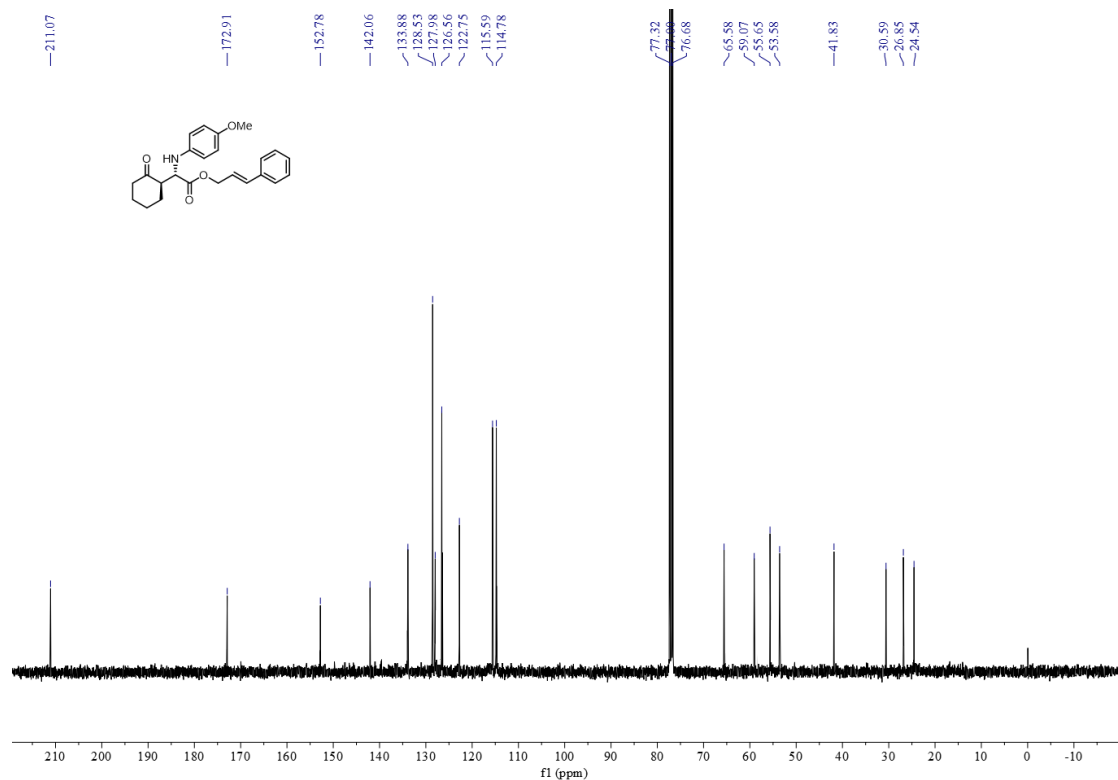



(S)-N-isopropyl-2-((4-methoxyphenyl)amino)-2-((R)-2-oxocyclohexyl)acetamide (**30a**)

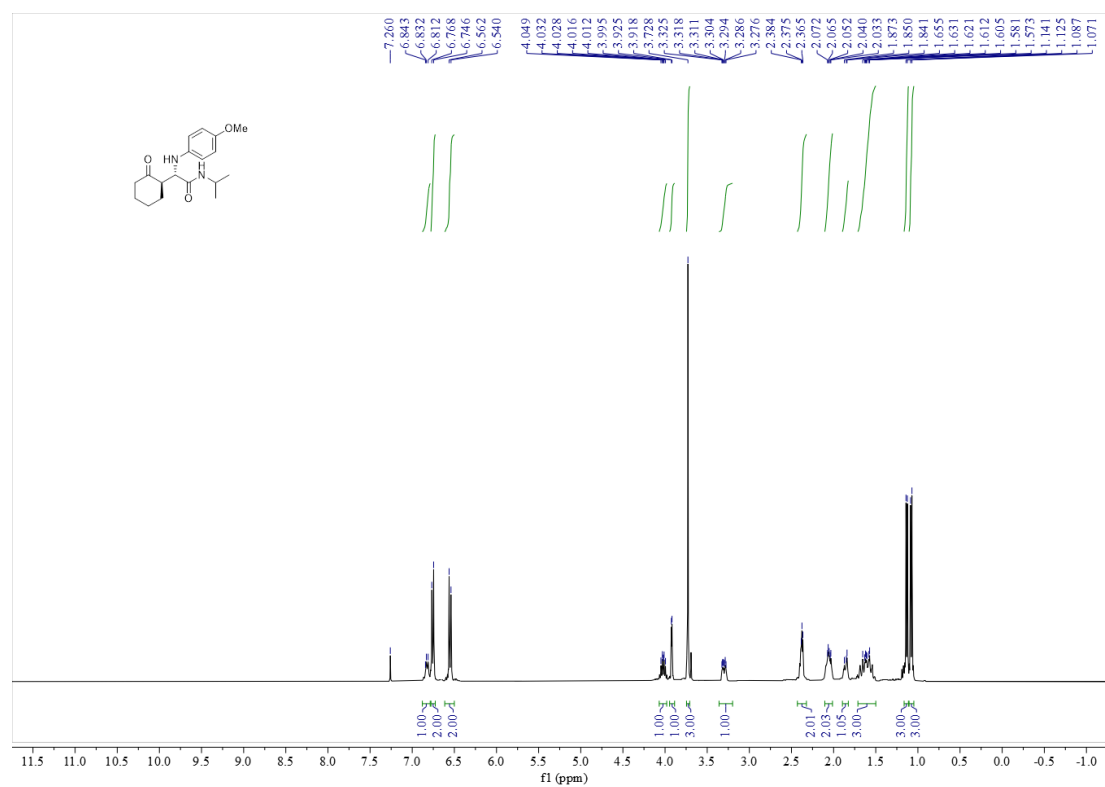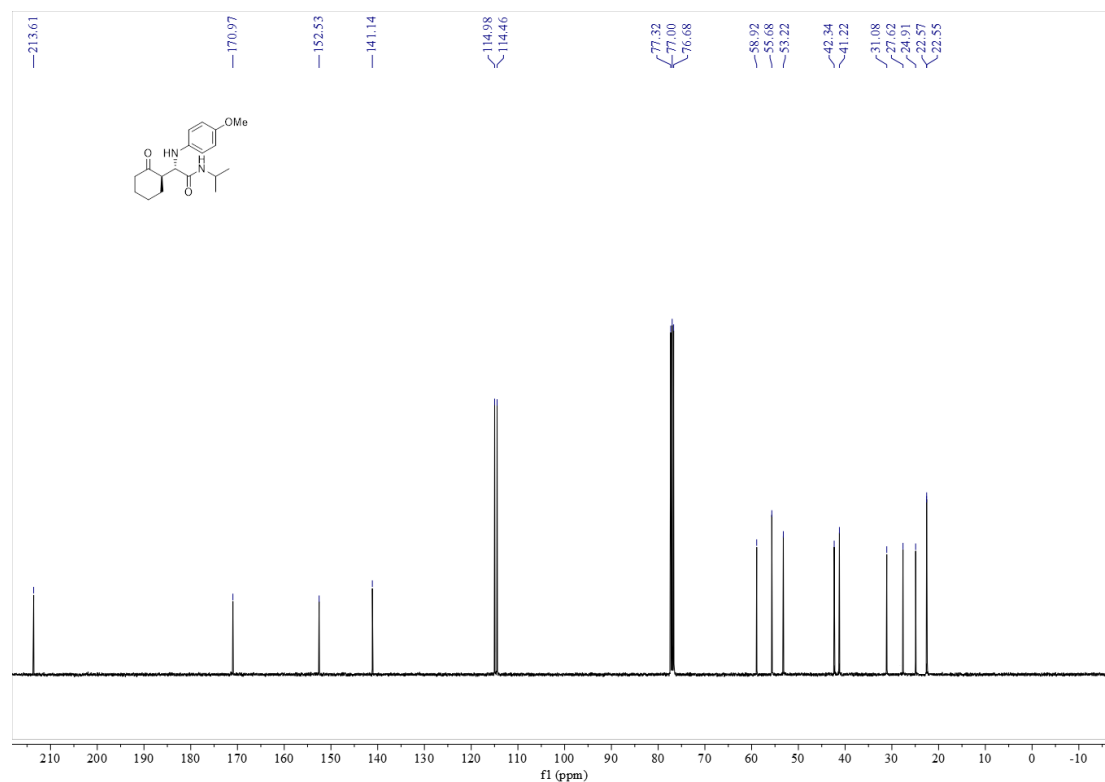

(S)-N-(4-fluorophenethyl)-2-((4-methoxyphenyl)amino)-2-((R)-2-oxocyclohexyl)acetamide (3pa)

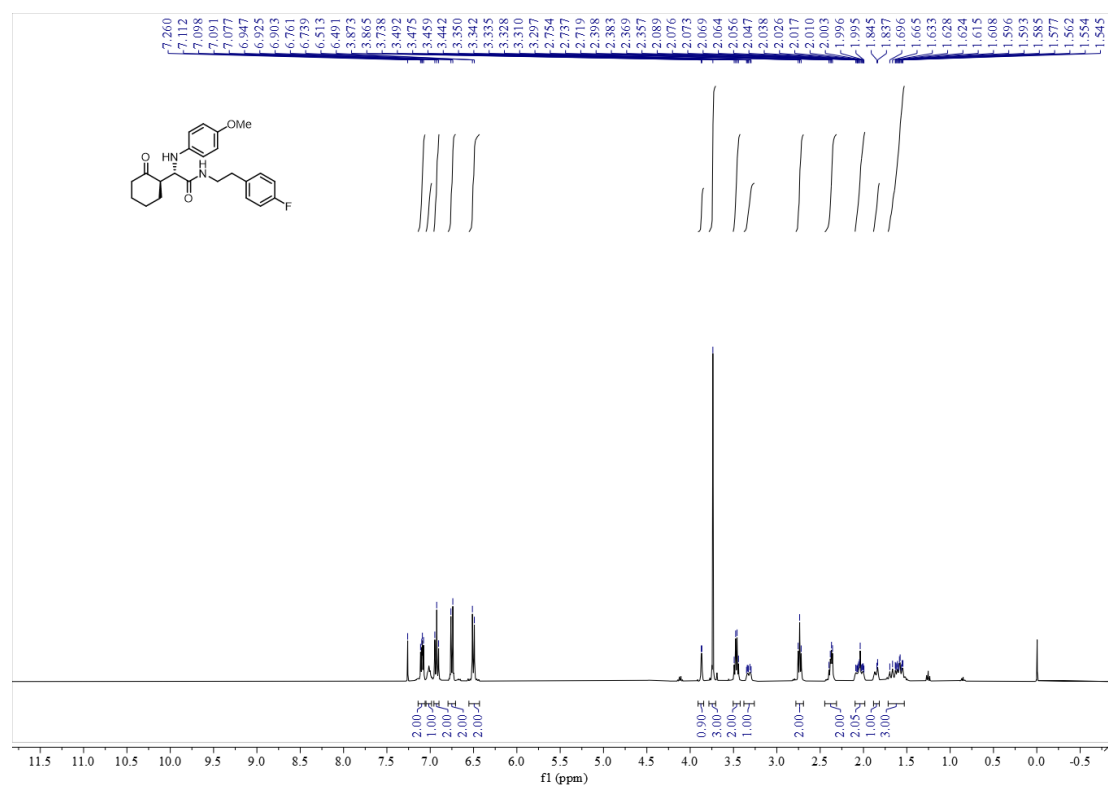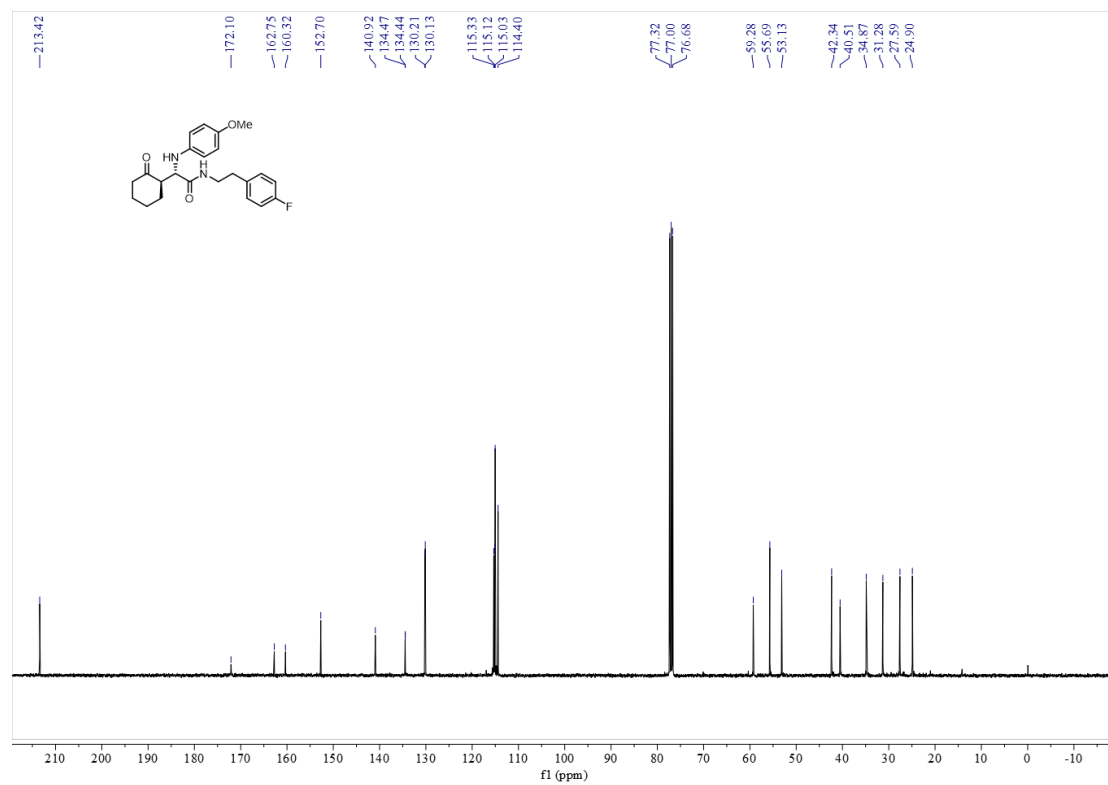

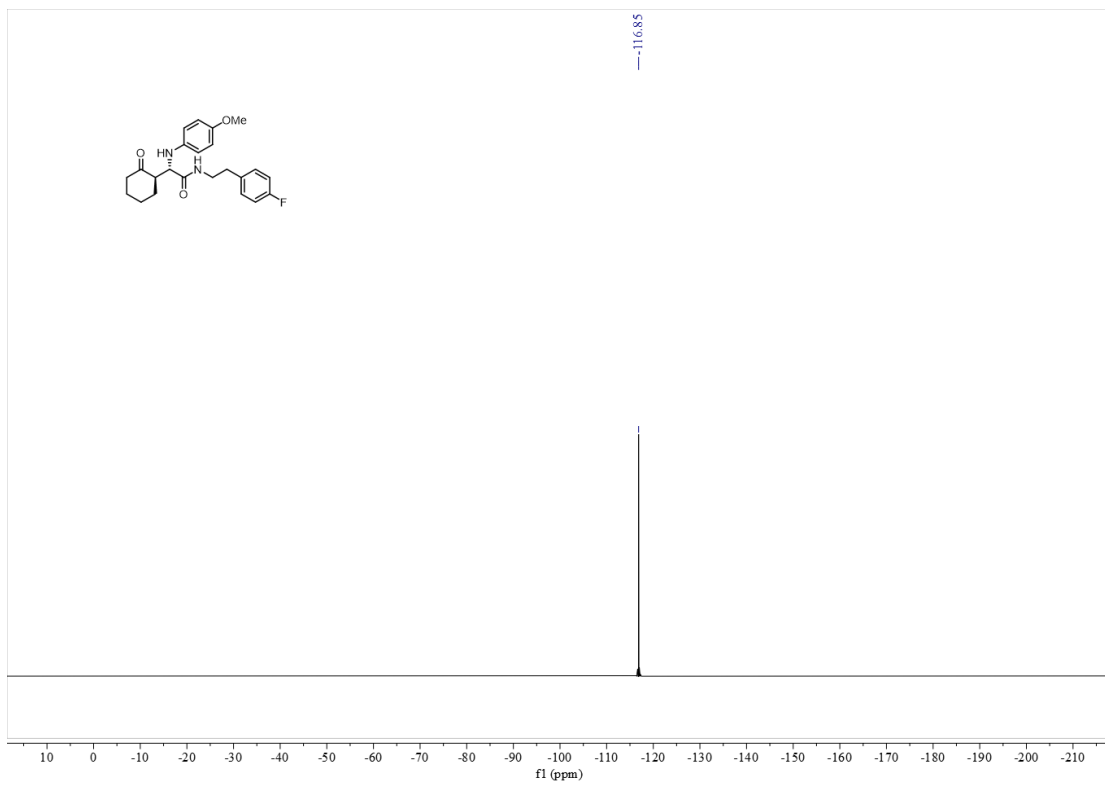

(S)-N-cyclohexyl-2-((4-methoxyphenyl)amino)-2-((R)-2-oxocyclohexyl)acetamide (**3qa**)

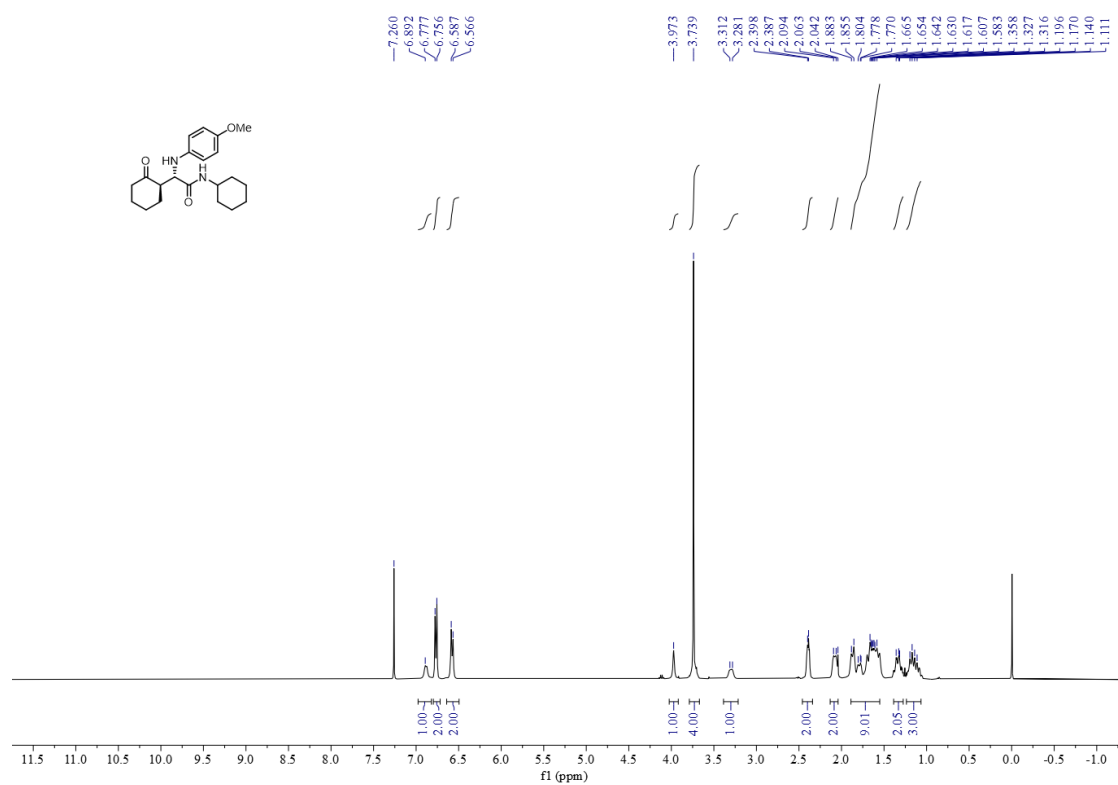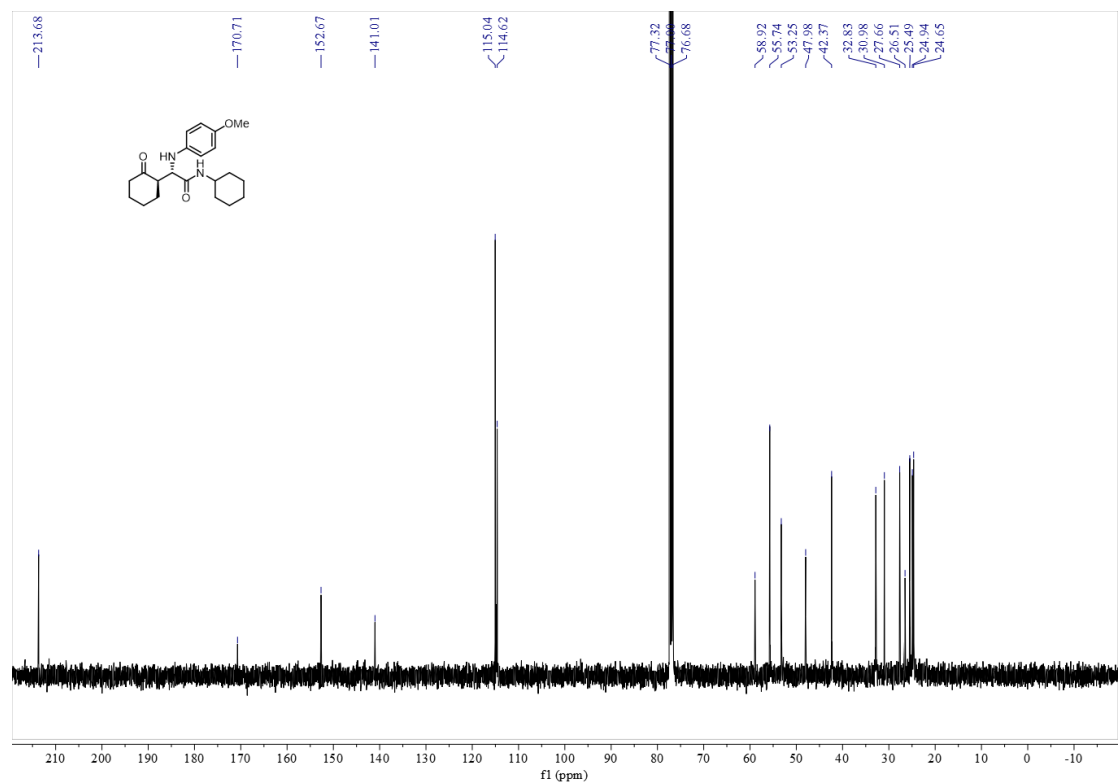

Ethyl 2-(4-((S)-2-((4-methoxyphenyl)amino)-2-((R)-2-oxocyclohexyl)acetamido)phenyl)ac-etate (**3ra**)

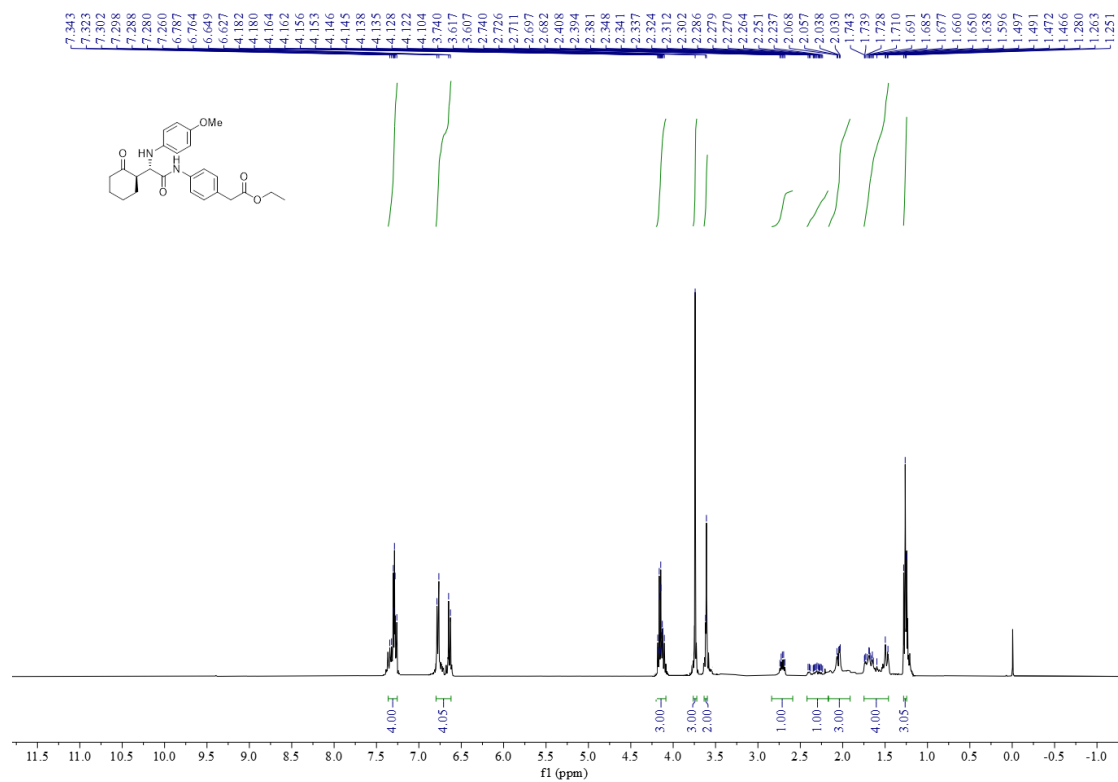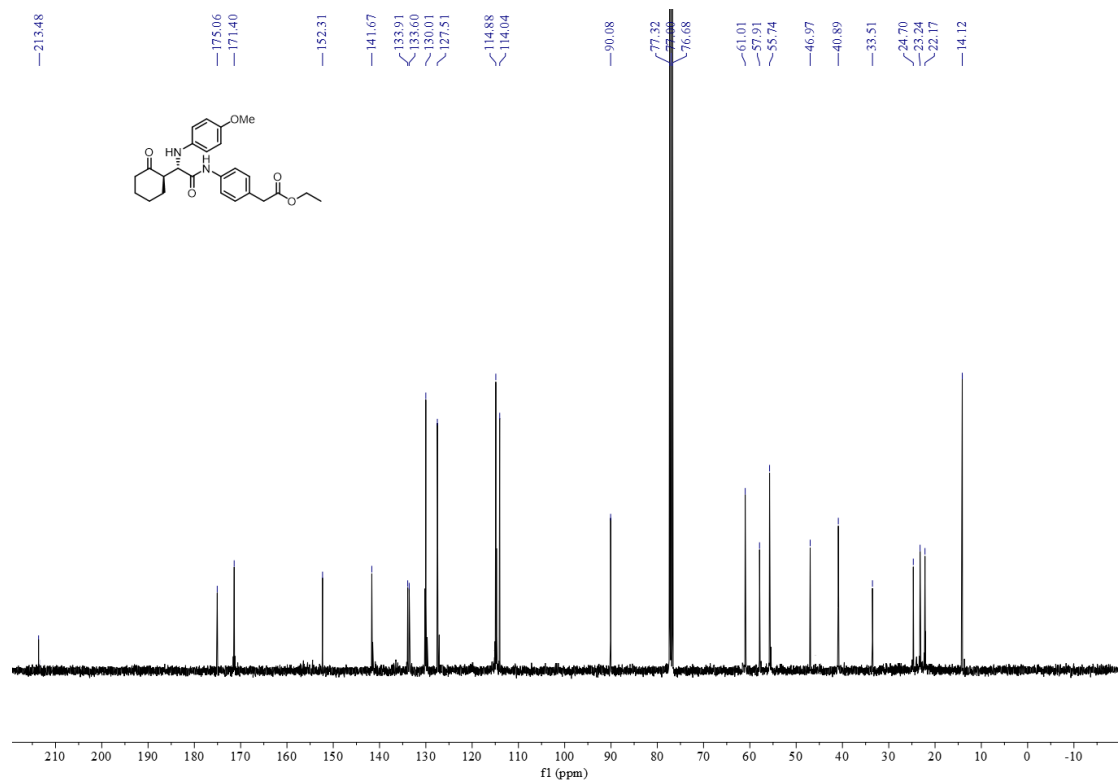

Ethyl 4-((S)-2-((4-methoxyphenyl)amino)-2-((R)-2-oxocyclohexyl)acetamido)benzoate (**3sa**)

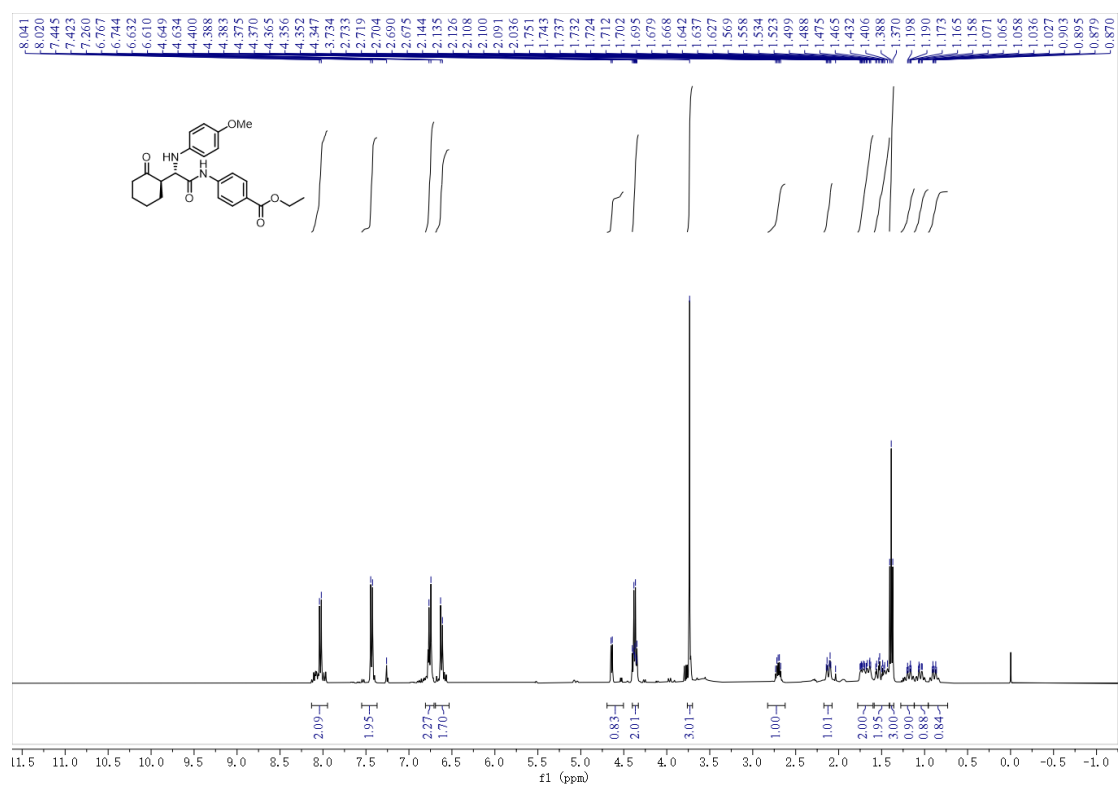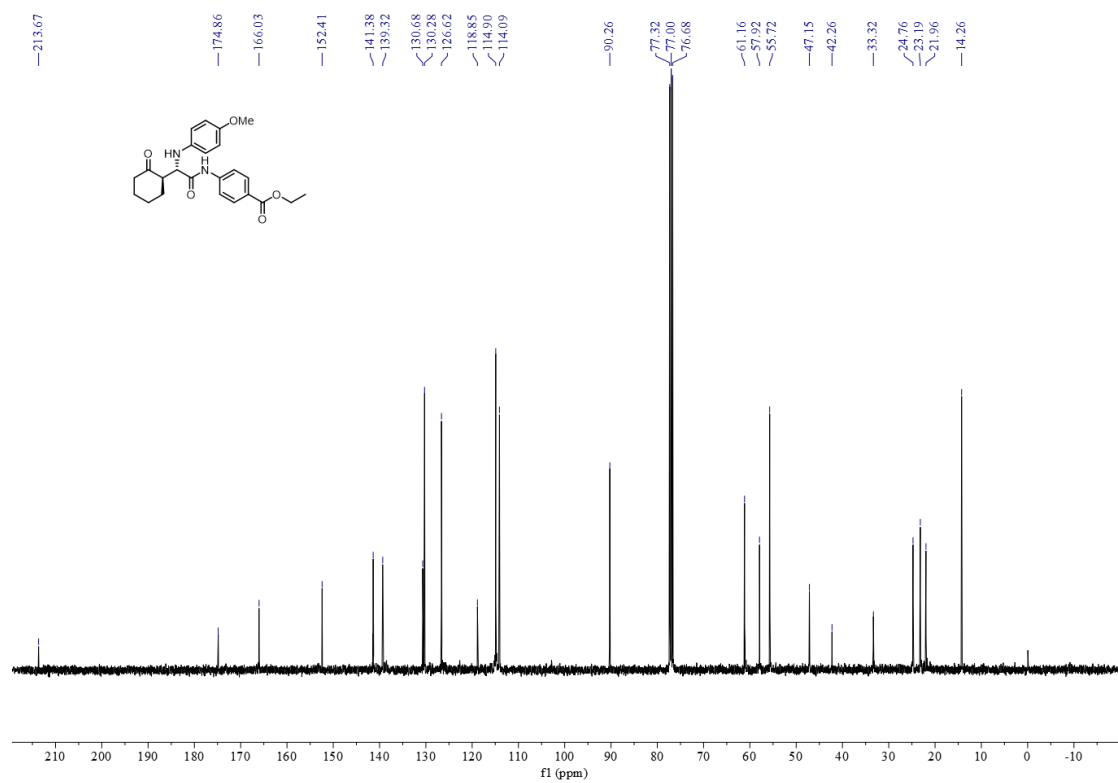

(S)-N-(2-(5-methoxy-1H-indol-2-yl)ethyl)-2-((4-methoxyphenyl)amino)-2-((R)-2-oxocyclohexyl)acetamide (3ta)

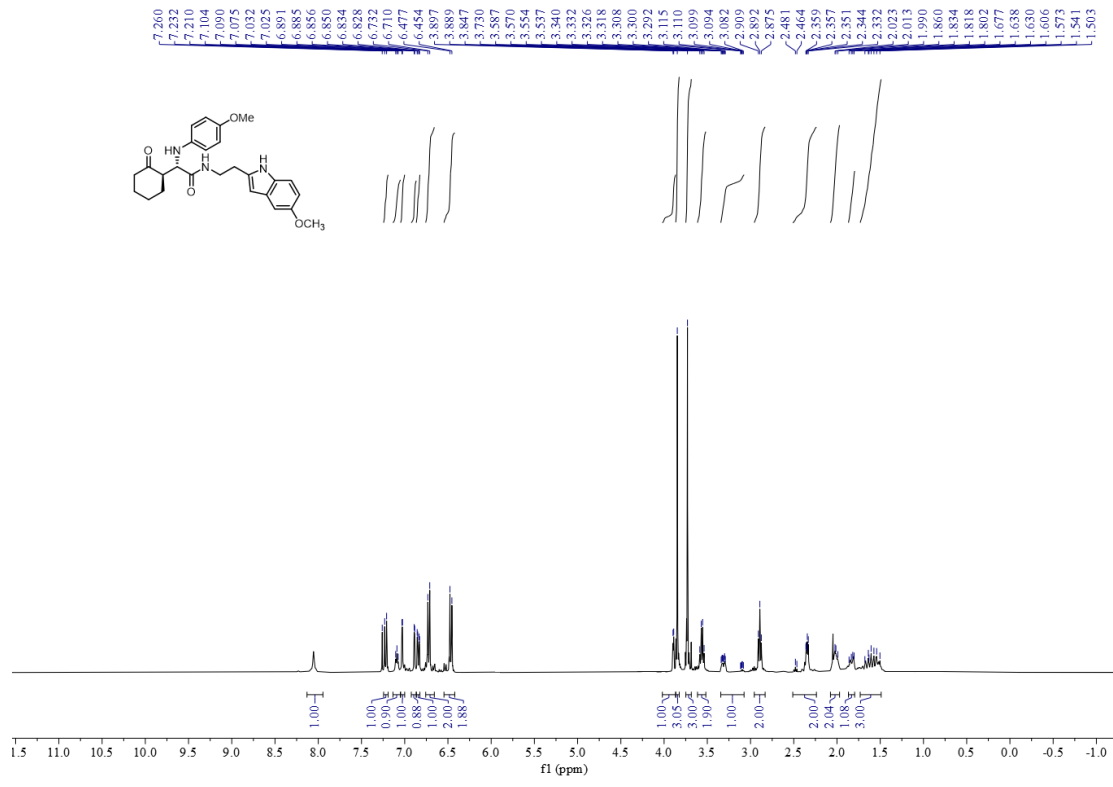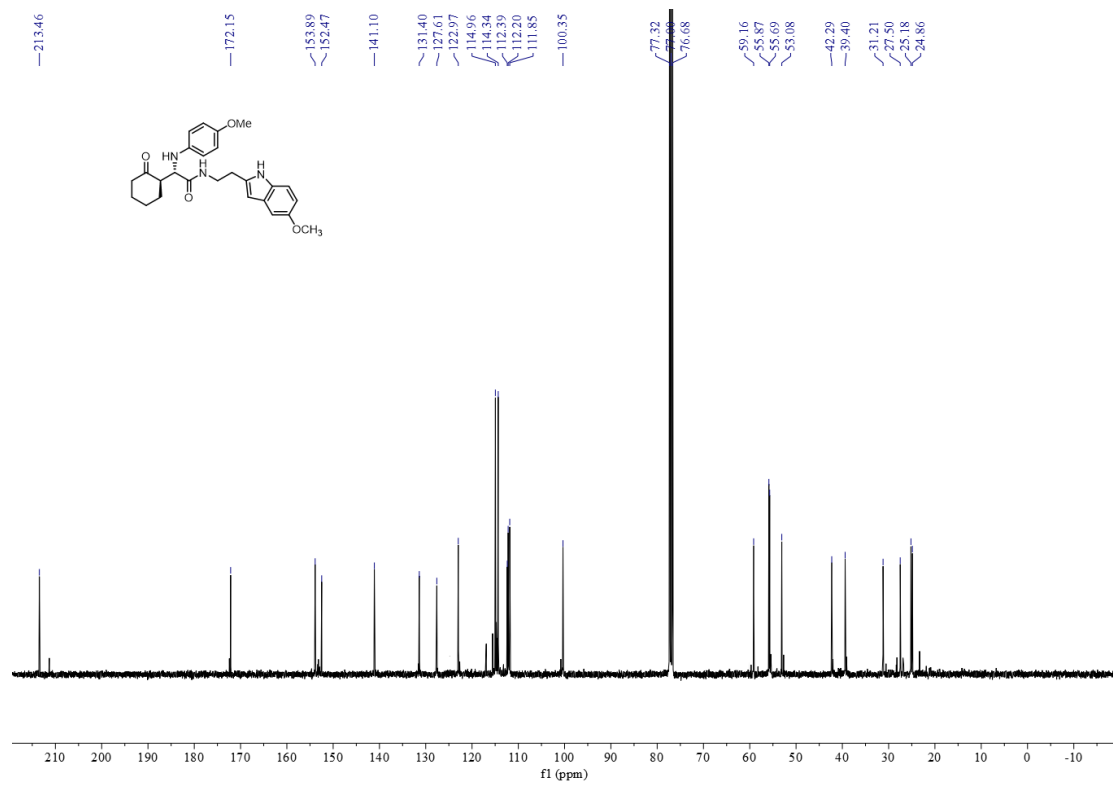

Ethyl (2S)-2-((4-methoxyphenyl)amino)-2-((1R)-3-methyl-2-oxocyclohexyl)acetate (**3ab**)

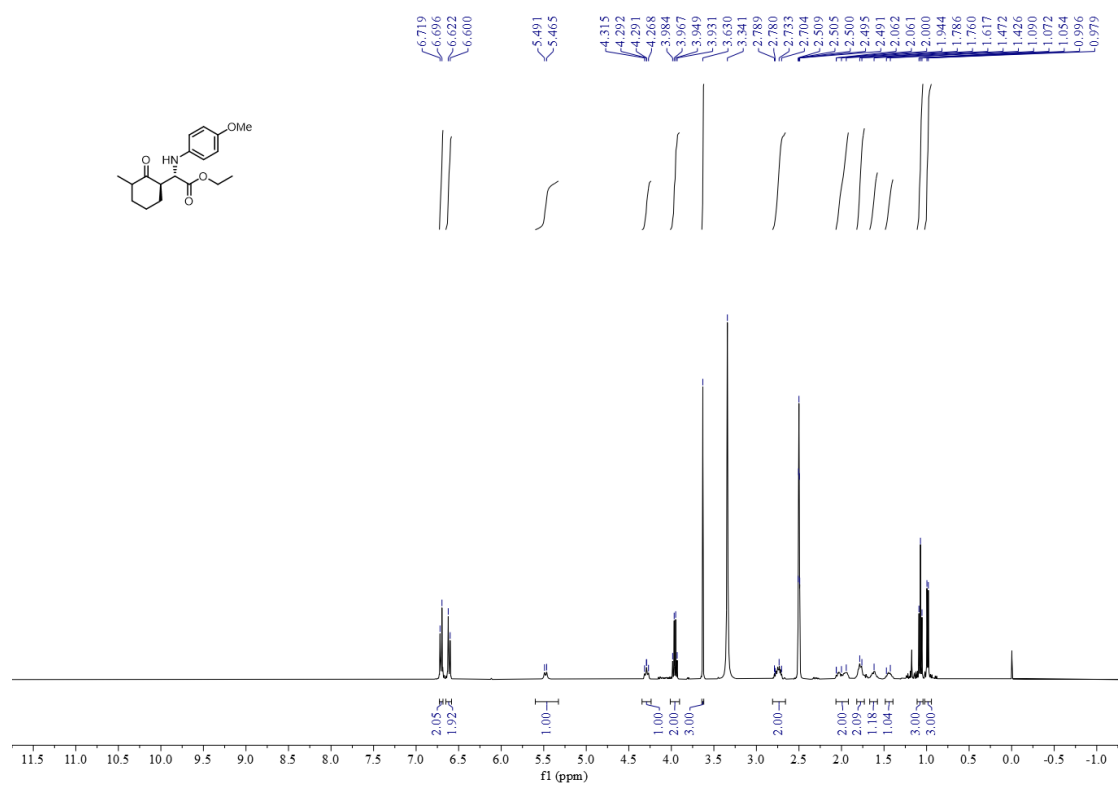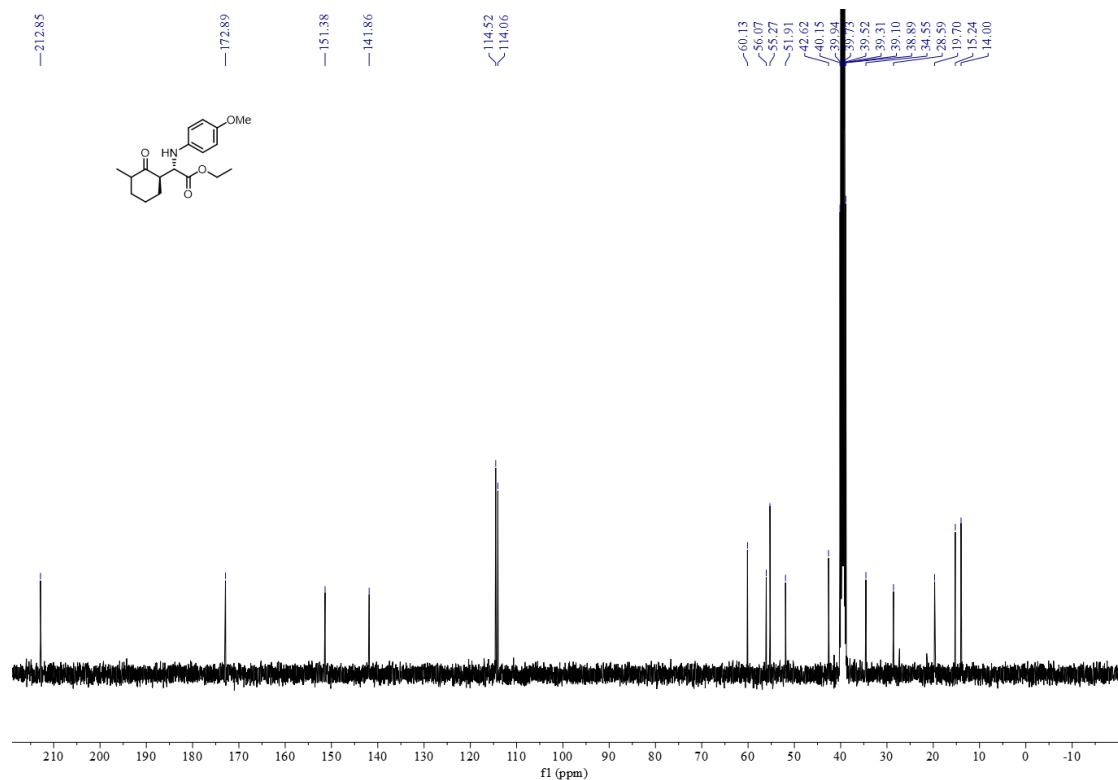



Ethyl (S)-2-((R)-4,4-dimethyl-2-oxocyclohexyl)-2-((4-methoxyphenyl)amino)acetate (**3ac**)

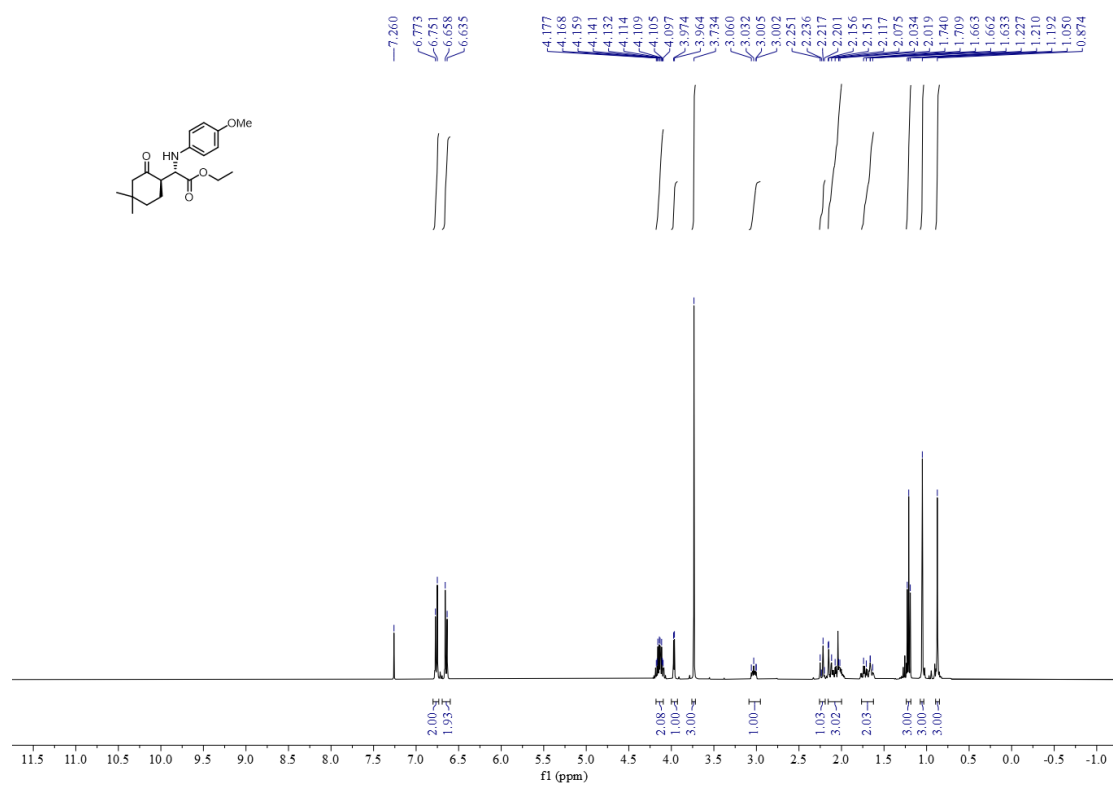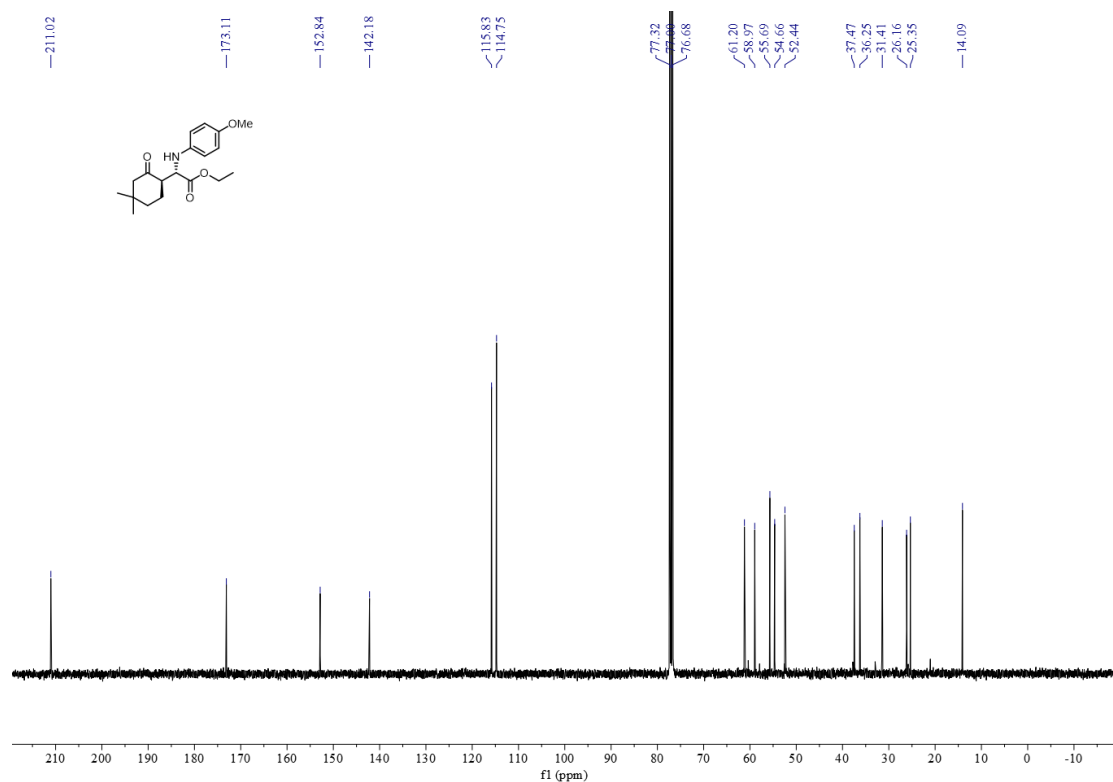

Ethyl (S)-2-((R)-5,5-dimethyl-2-oxocyclohexyl)-2-((4-methoxyphenyl)amino)acetate (**3ad**)

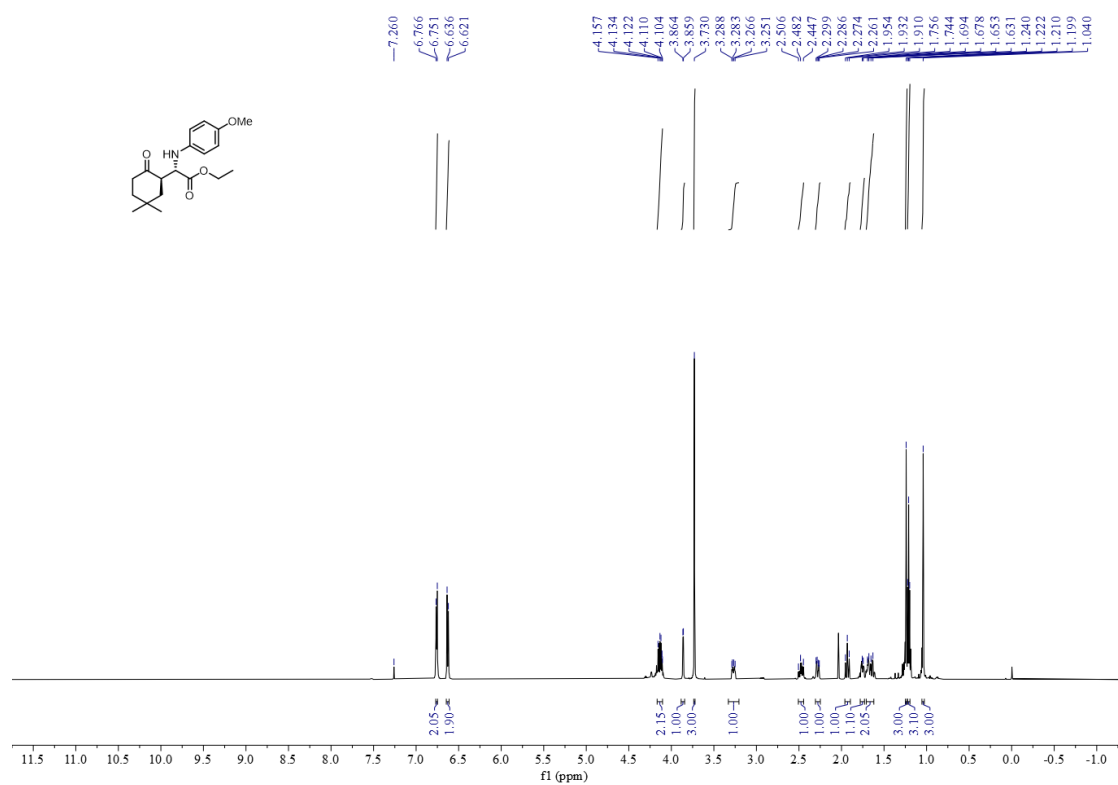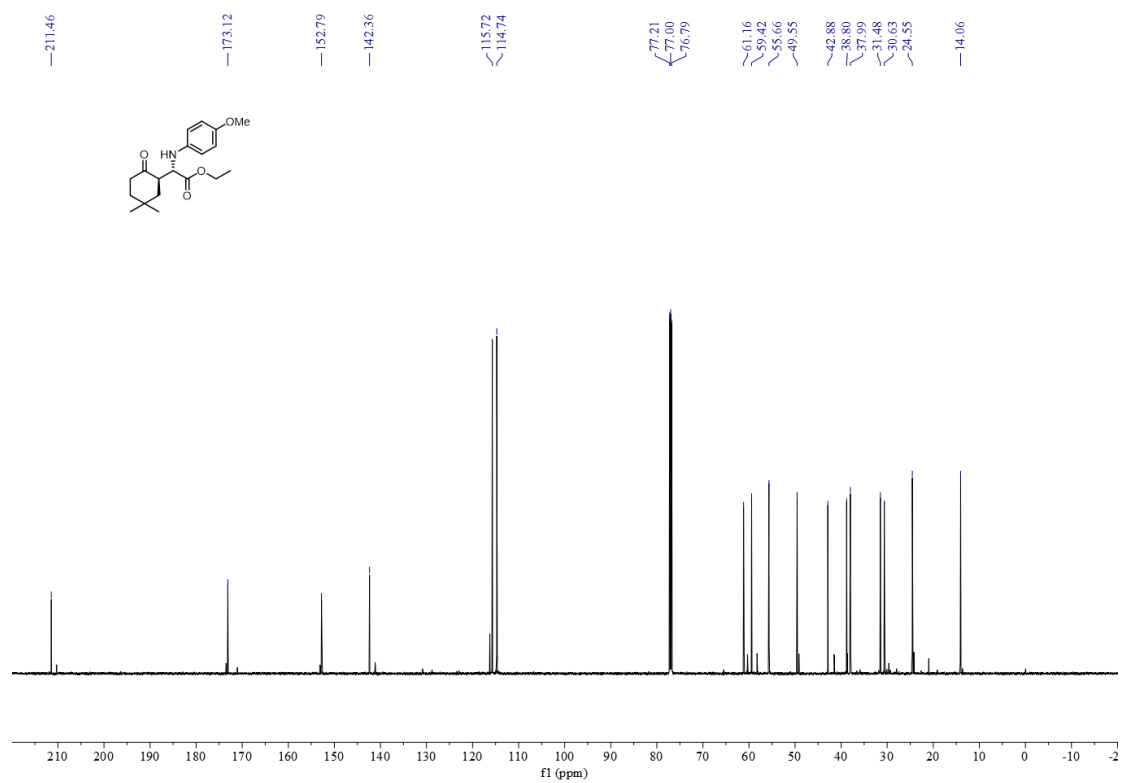

Ethyl (S)-2-((4-methoxyphenyl)amino)-2-((R)-2-oxocycloheptyl)acetate (**3ae**)

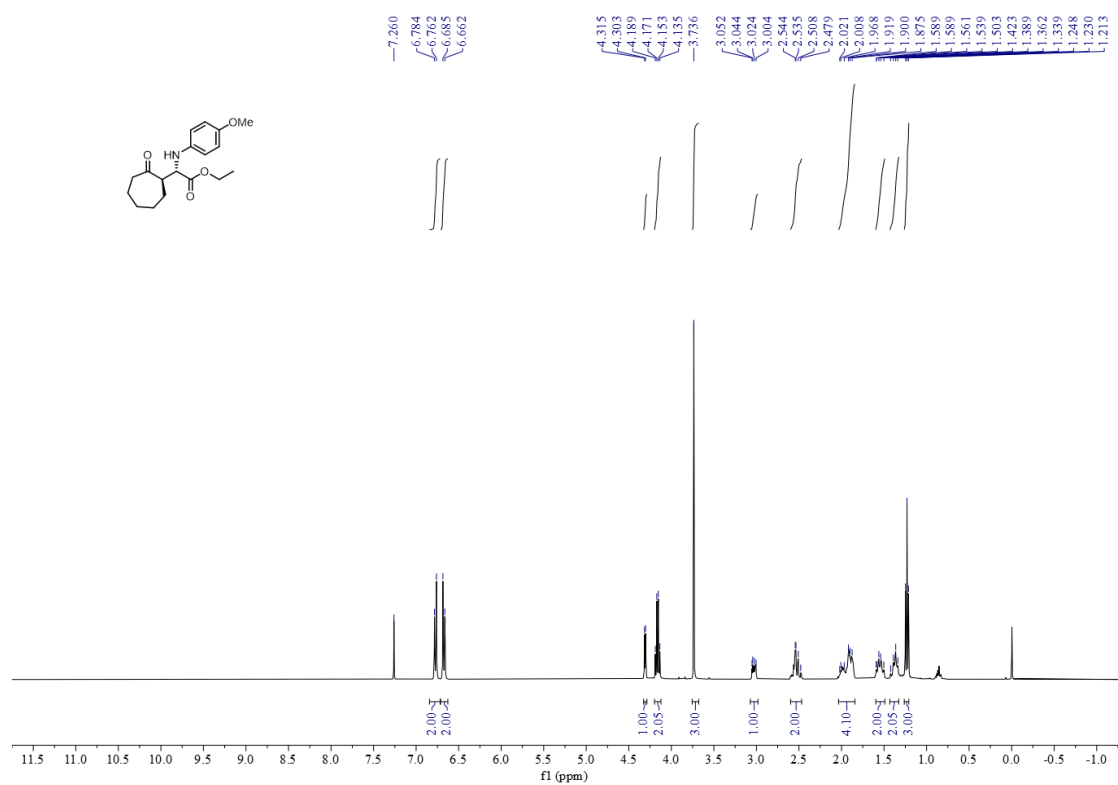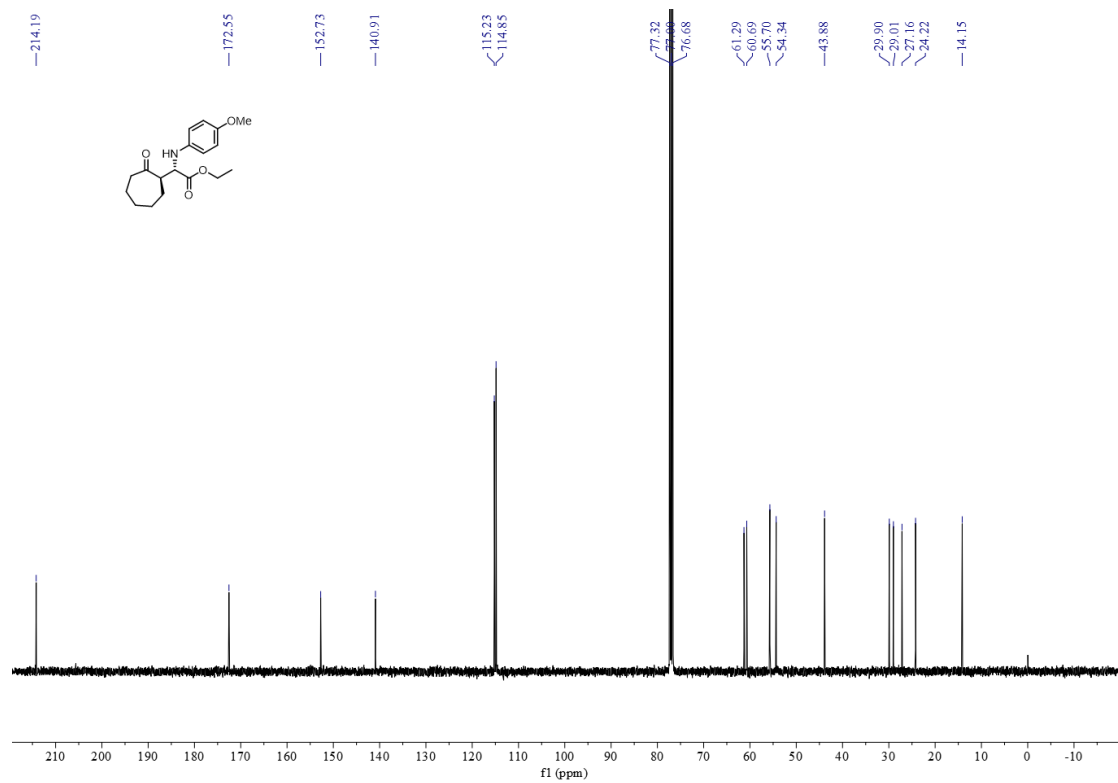

Ethyl (S)-2-((S)-4-oxotetrahydro-2H-pyran-3-yl)-2-(p-tolylamino)acetate (**3kf**)

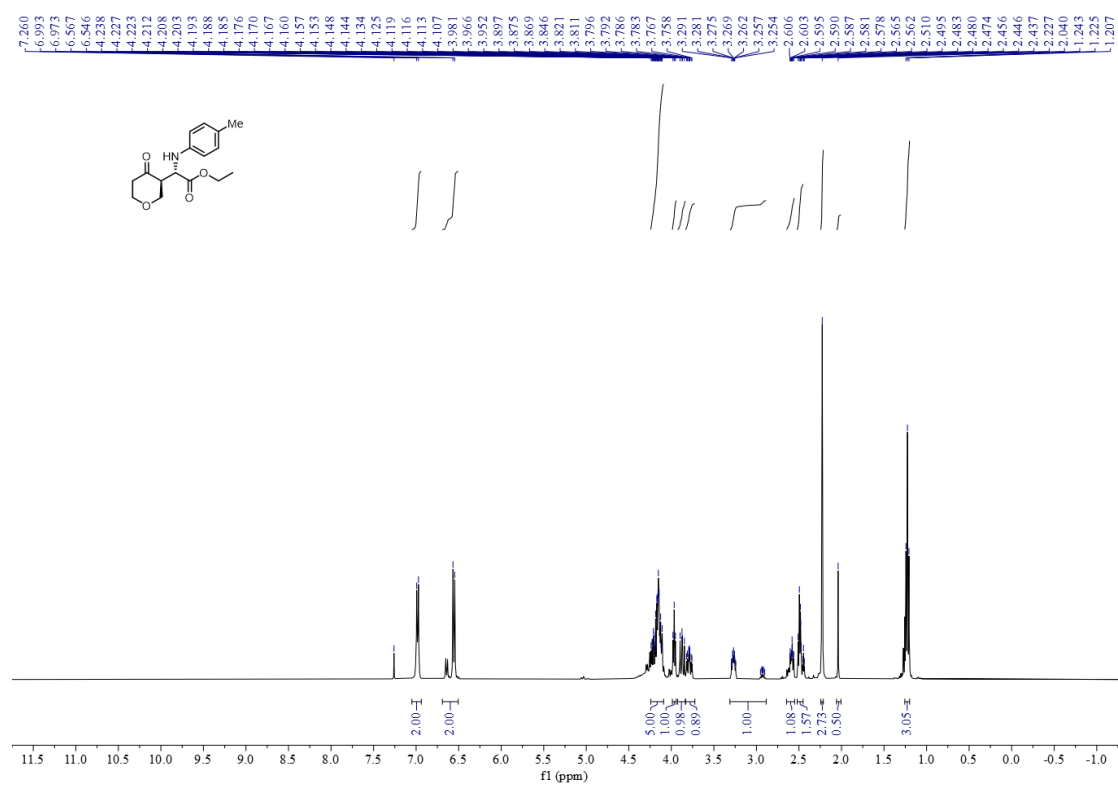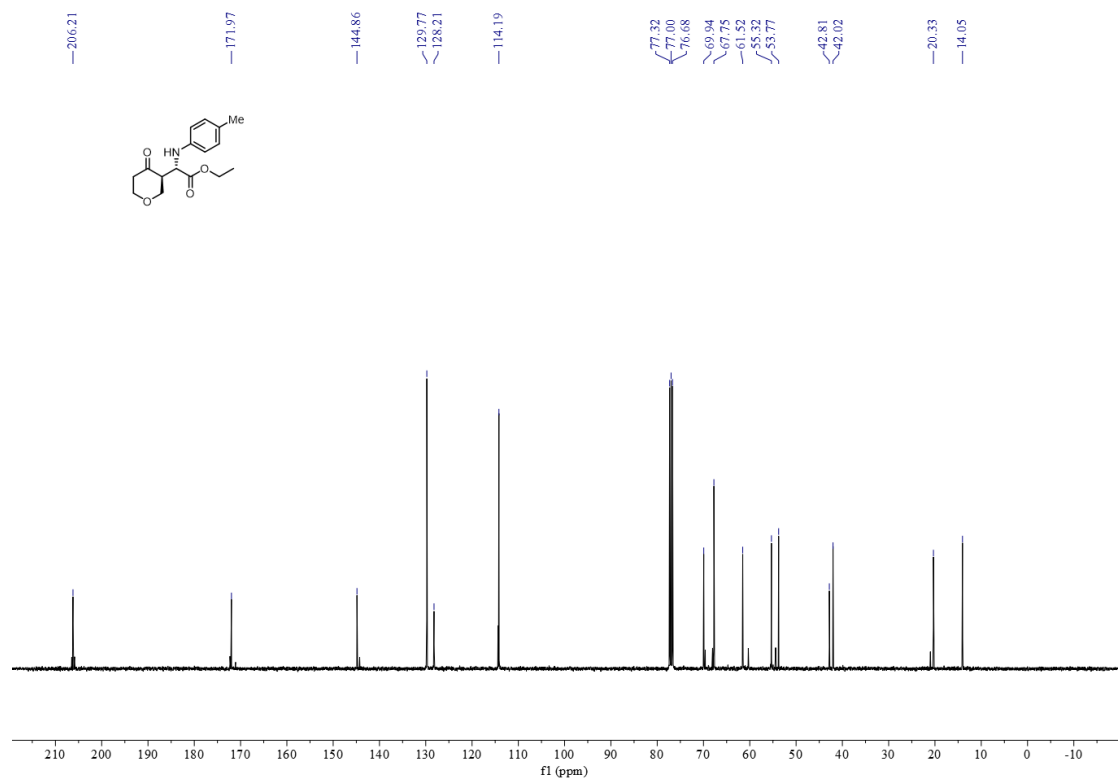

Ethyl (S)-2-((4-methoxyphenyl)amino)-2-((R)-4-oxotetrahydro-2H-thiopyran-3-yl)acetate (**3ag**)

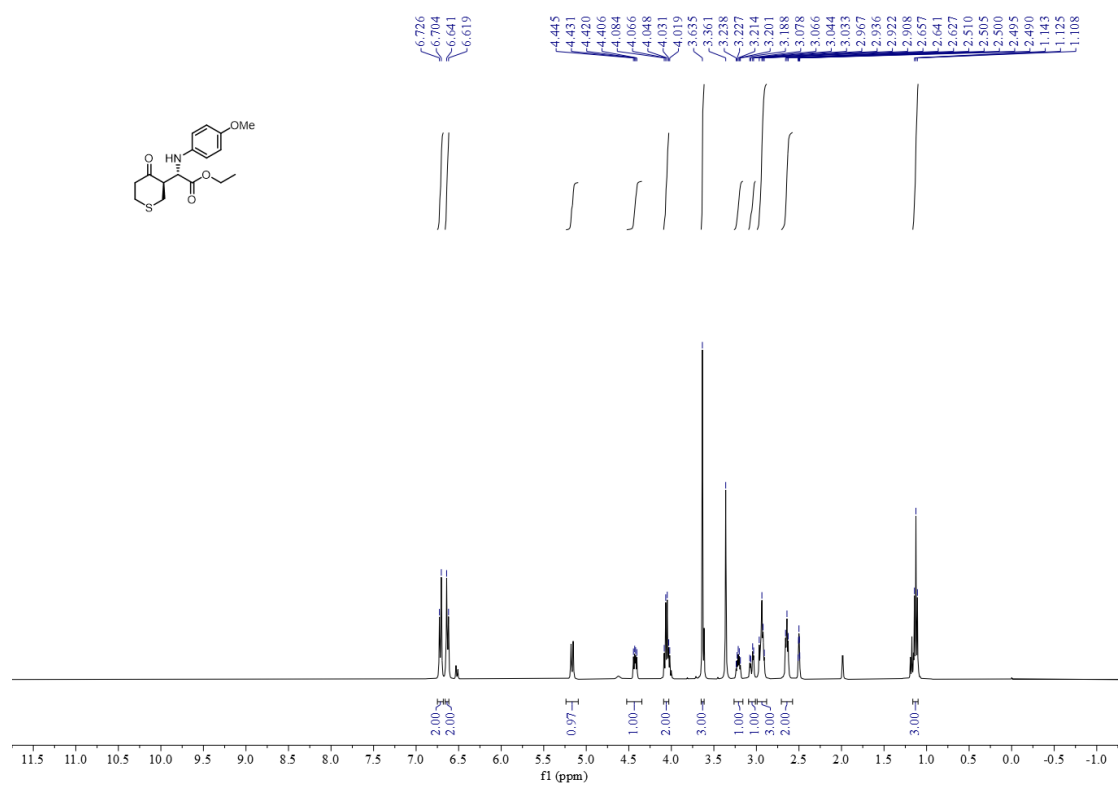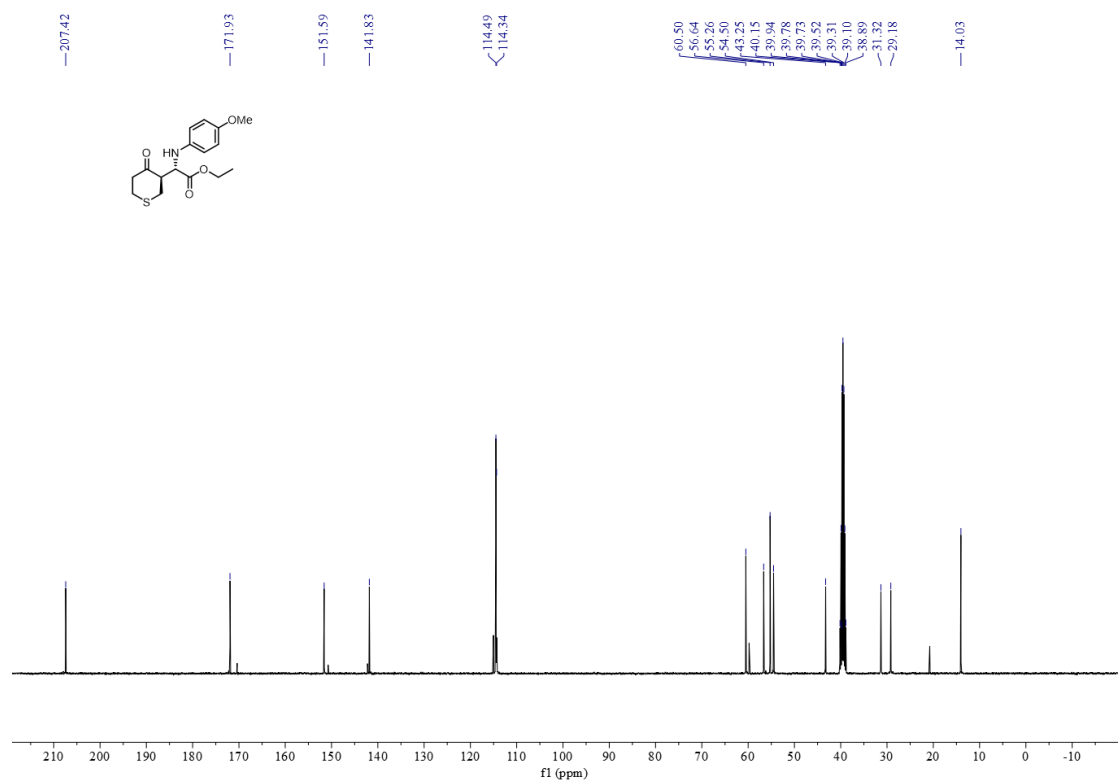

Ethyl (S)-2-((4-methoxyphenyl)amino)-2-((1R,5R)-5-methyl-2-oxocyclohexyl)acetate (**3ah**)

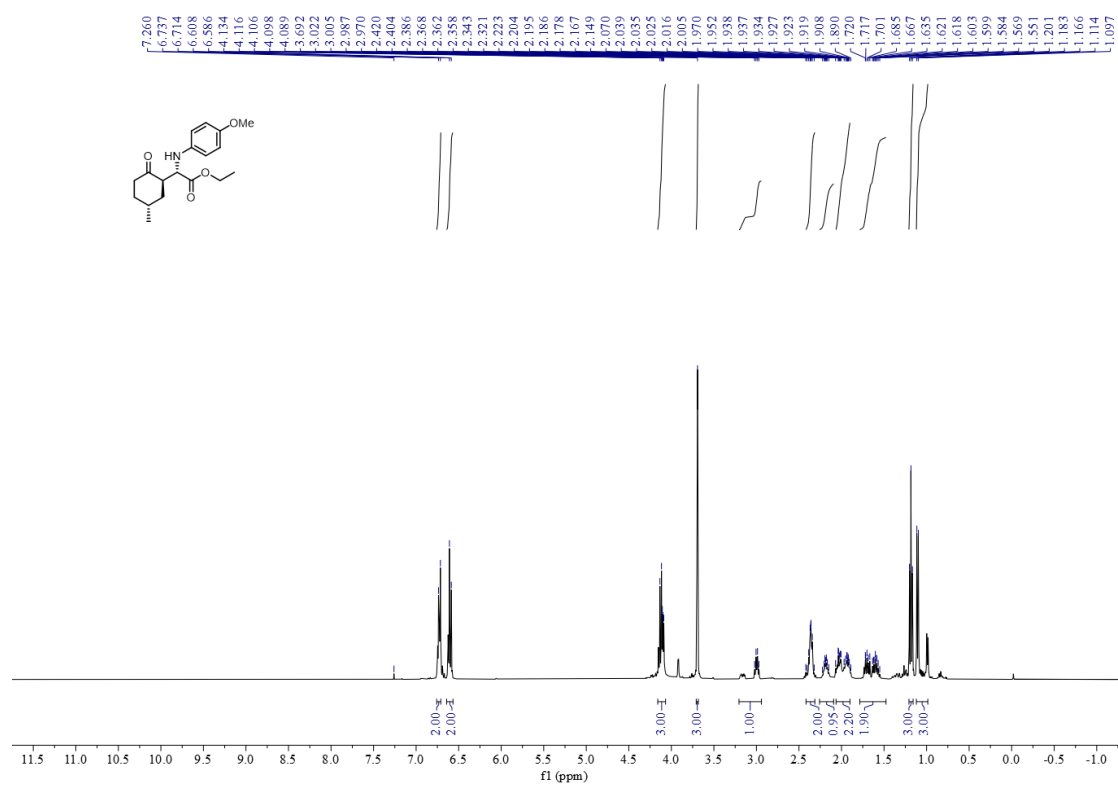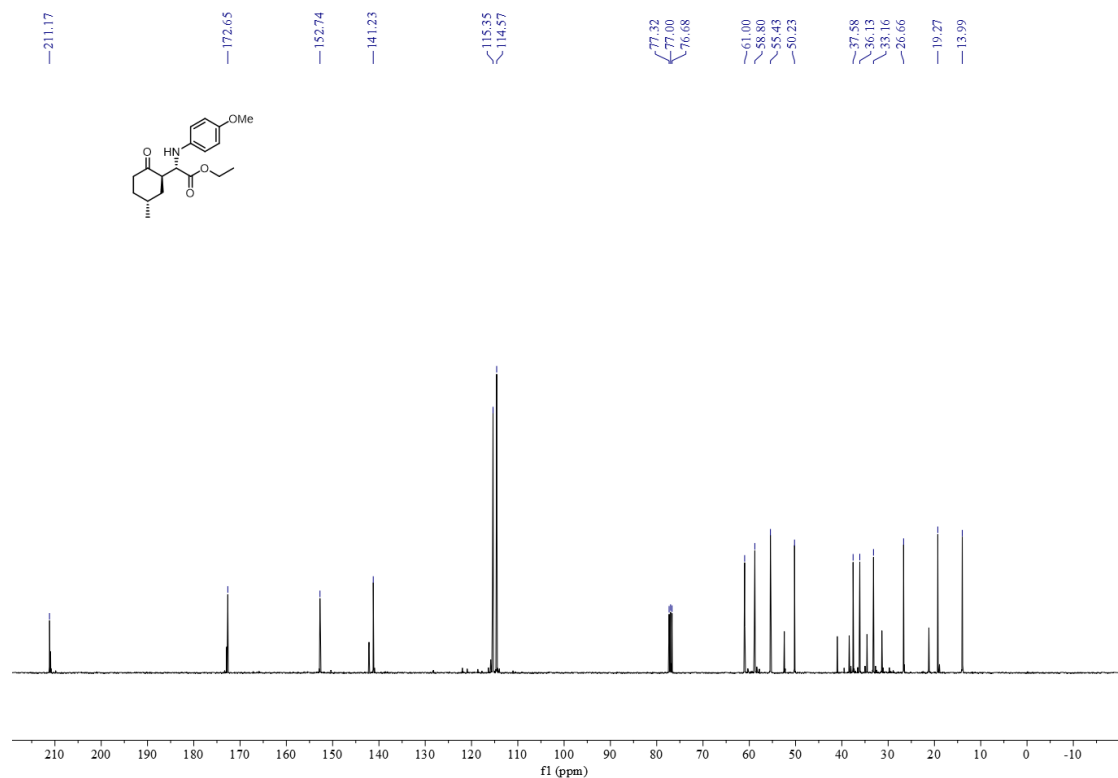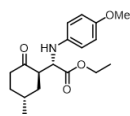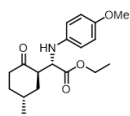

Ethyl (S)-2-((1R,5R)-5-(tert-butyl)-2-oxocyclohexyl)-2-((4-methoxyphenyl)amino)acetate (**3ai**)

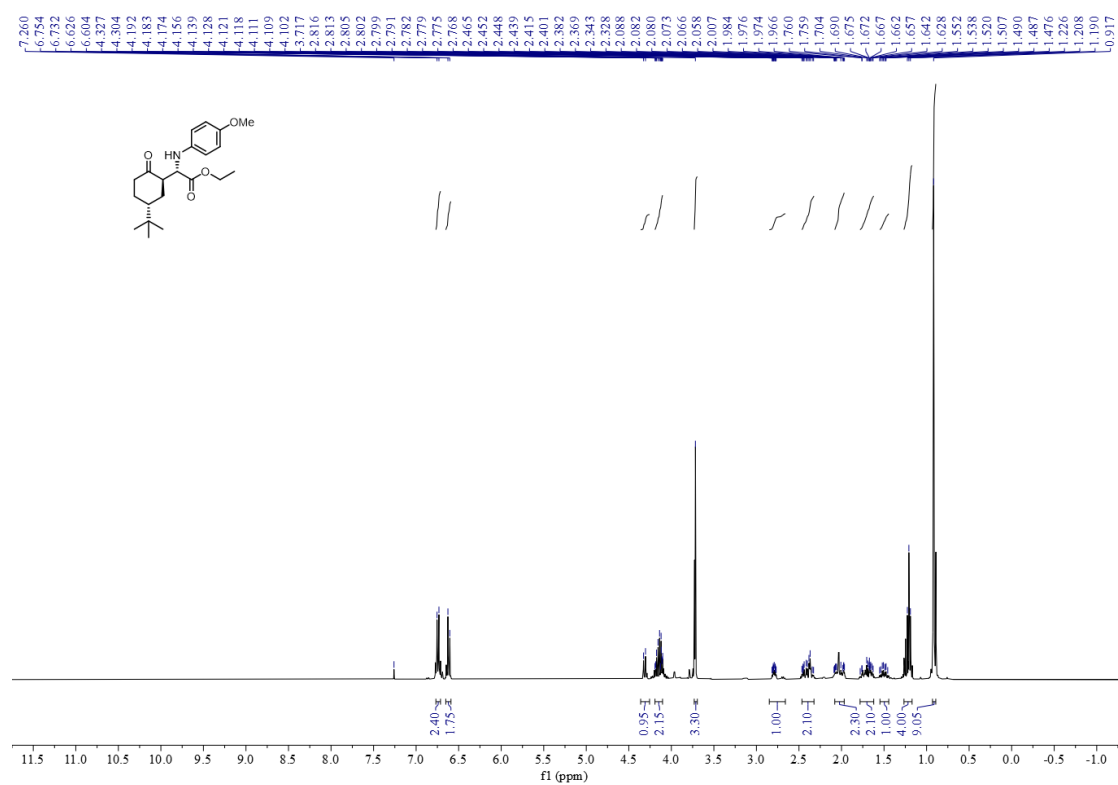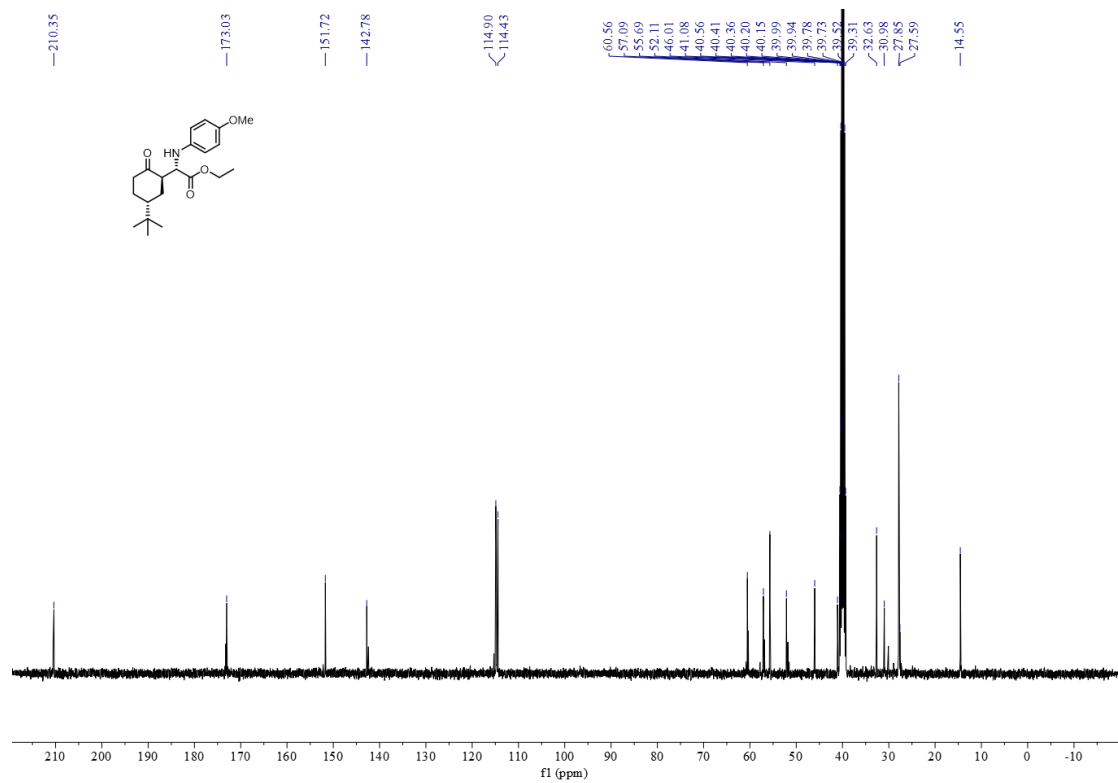

Ethyl (1R,3R)-3-((S)-2-ethoxy-1-((4-methoxyphenyl)amino)-2-oxoethyl)-4-oxocyclohexan-e-1-carboxylate (**3aj**)

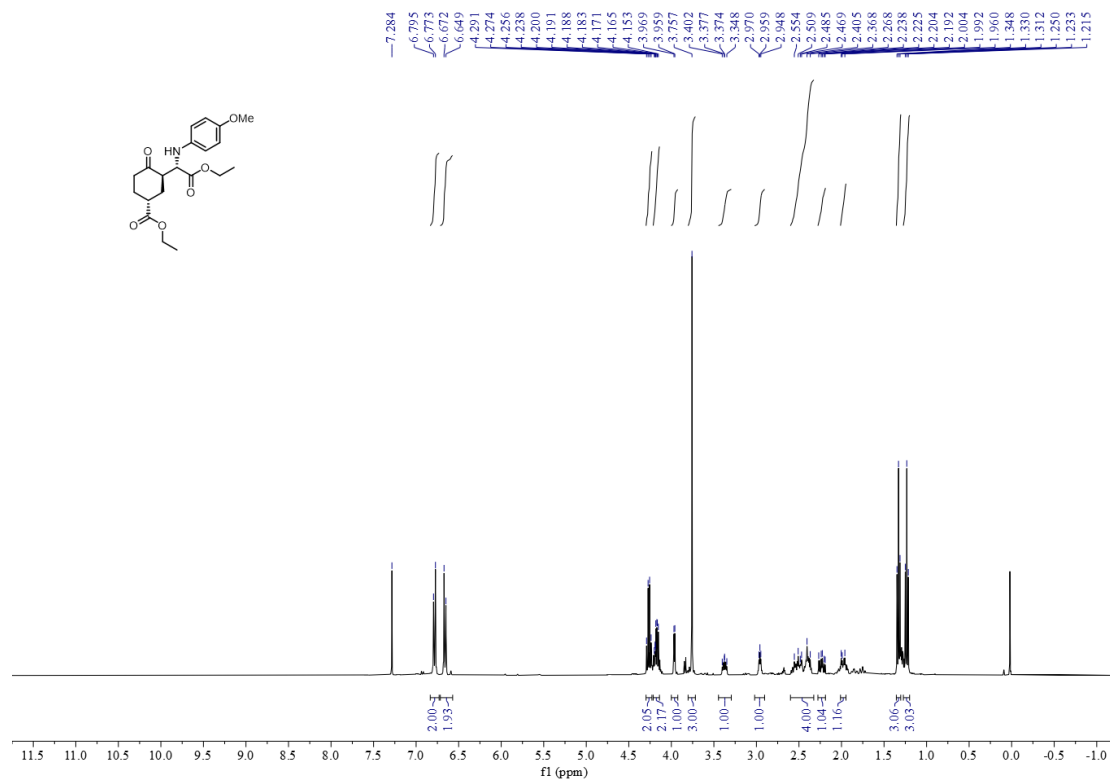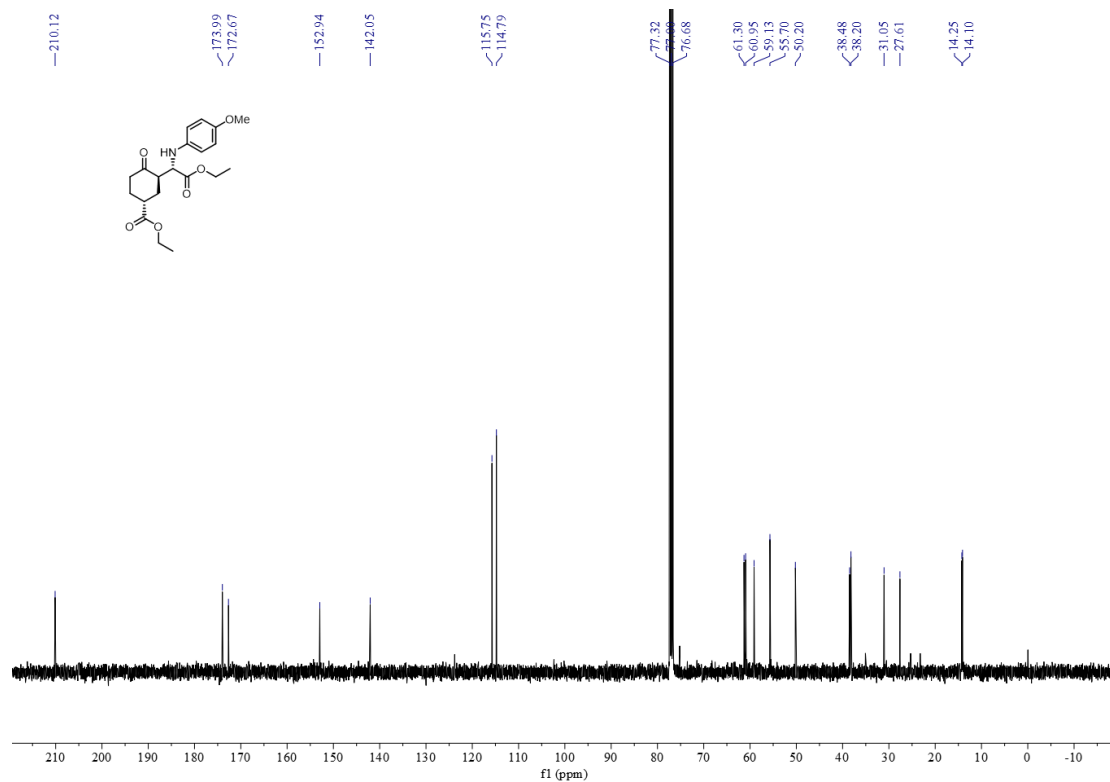



Ethyl 2-((R)-3,3-dimethyl-9-oxo-1,5-dioxaspiro[5.5]undecan-8-yl)-2-((4-methoxyphenyl)amino)acetate  
**(3ak)**

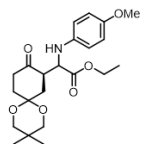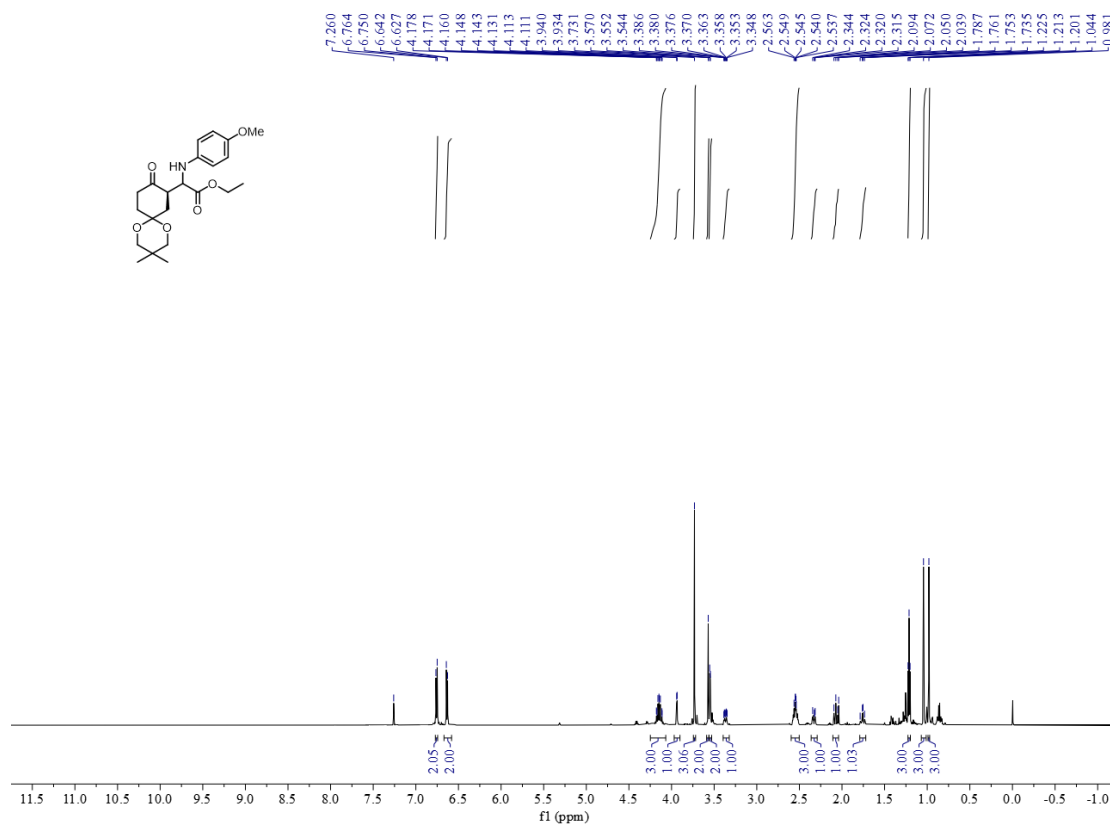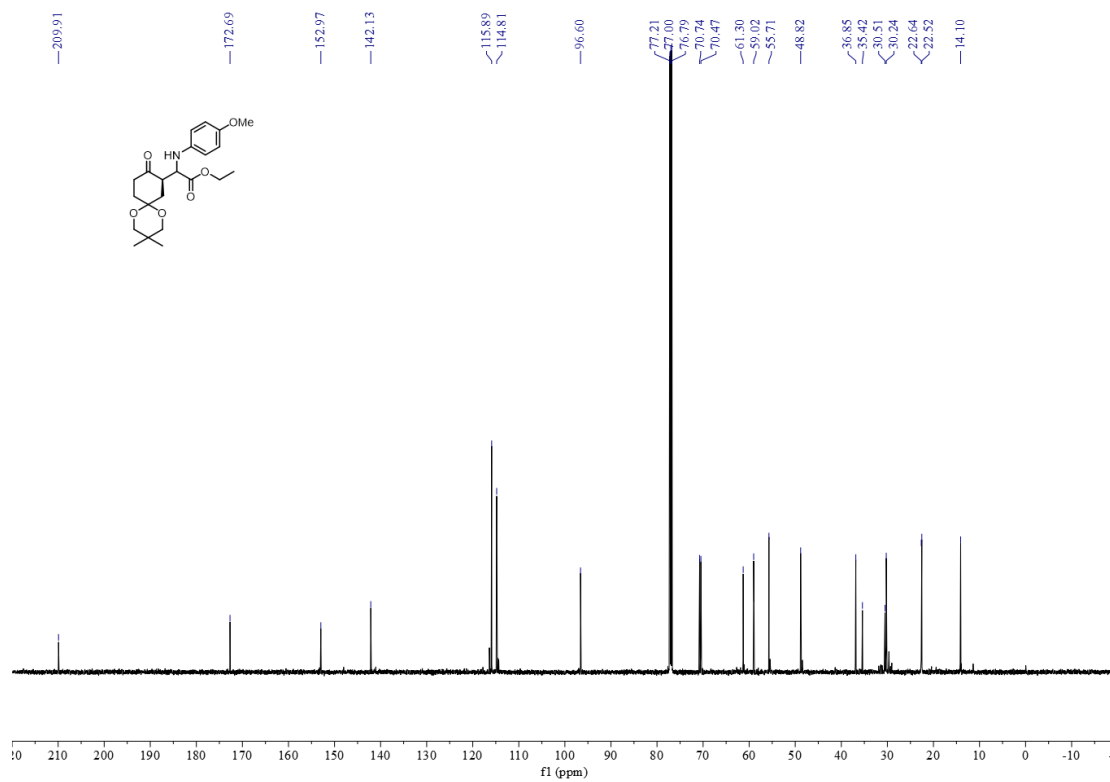

Ethyl (S)-2-((4-methoxyphenyl)amino)-2-((R)-8-oxo-1,4-dioxaspiro[4.5]decan-7-yl)acetate (**3a1**)

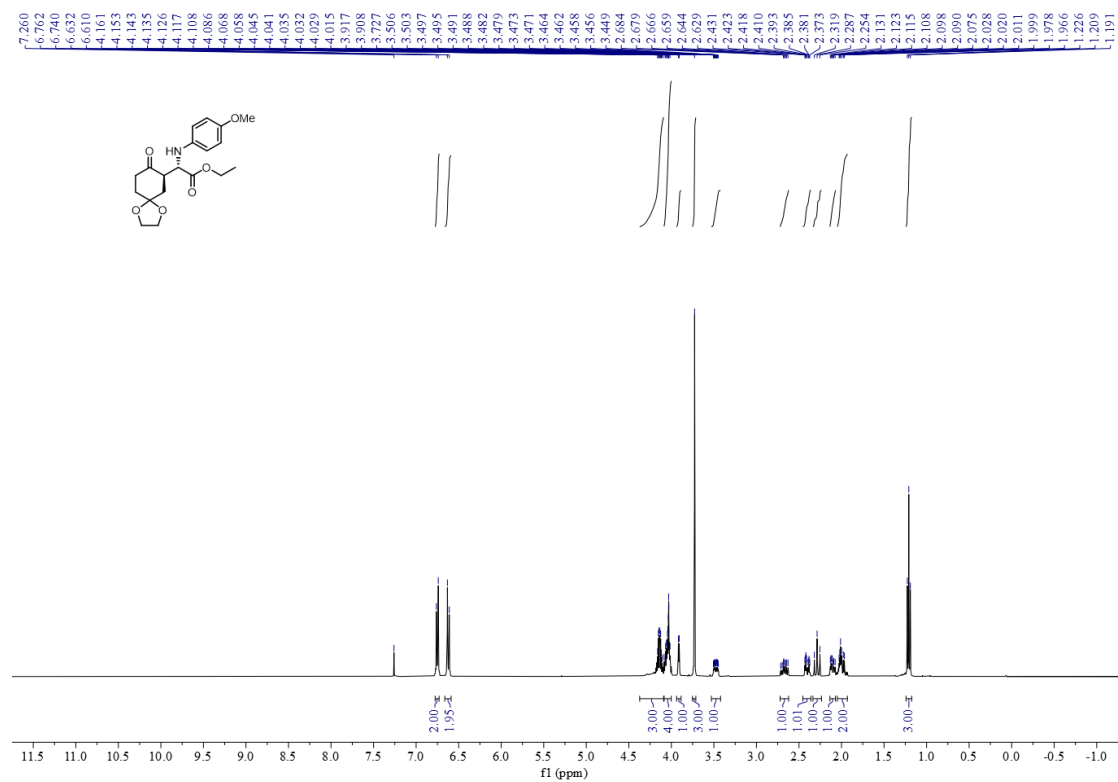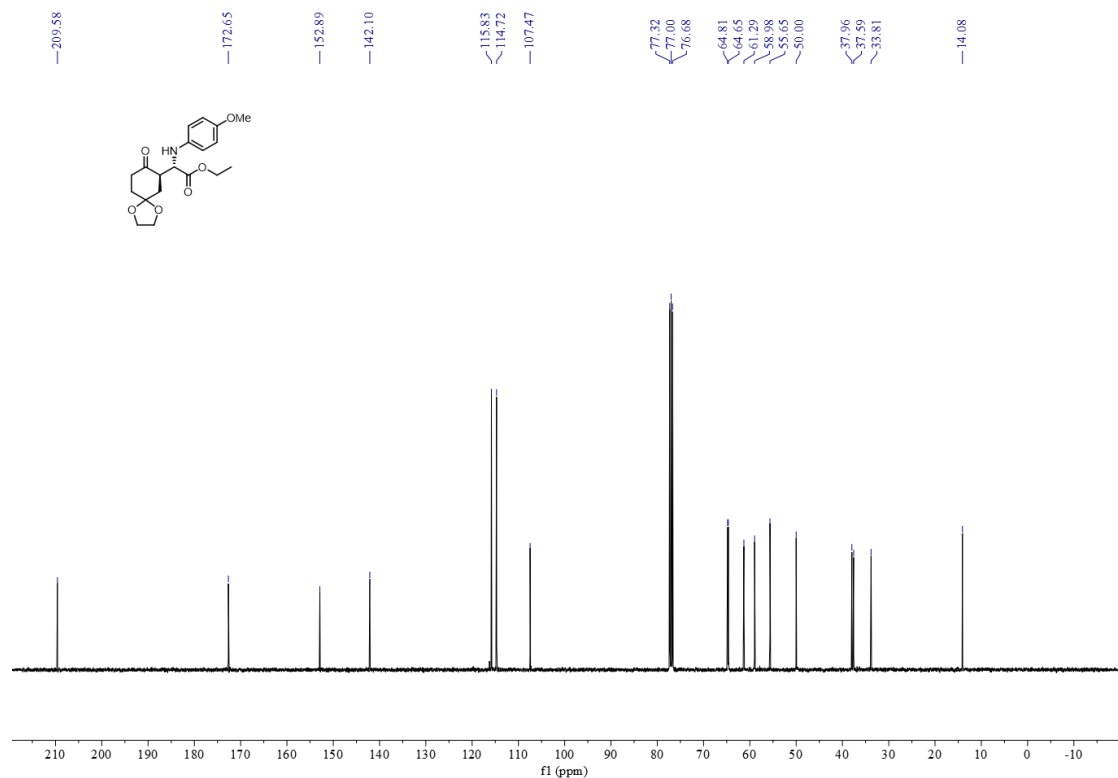

Ethyl (2S,3R)-2-((4-methoxyphenyl)amino)-3-methyl-4-oxohexanoate (**3am**)

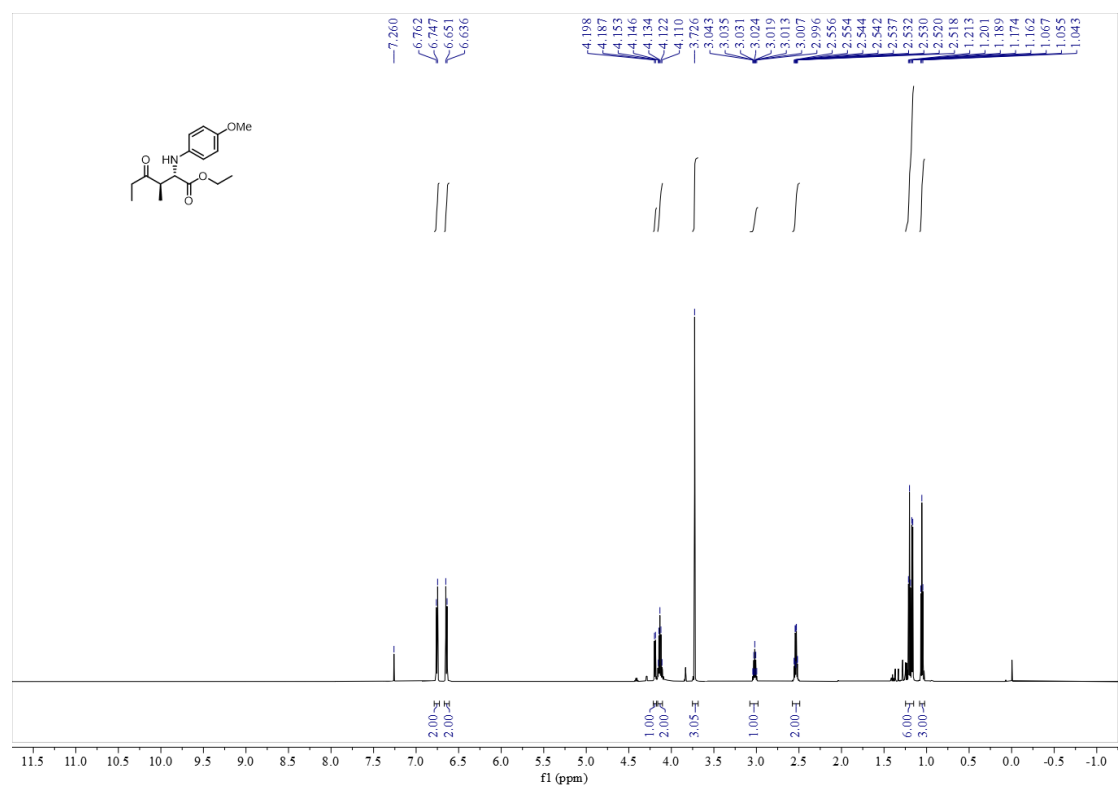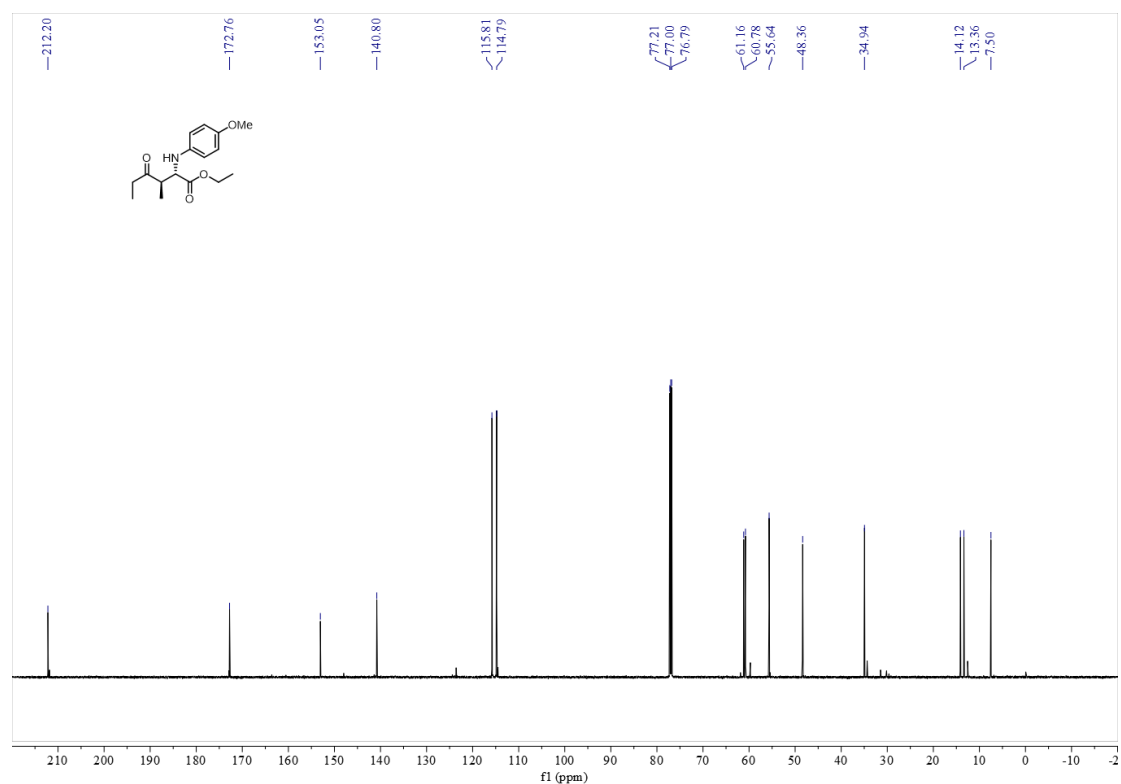

Ethyl (2S,3R)-3-formyl-2-((4-methoxyphenyl)amino)-4-methylpentanoate (**3an**)

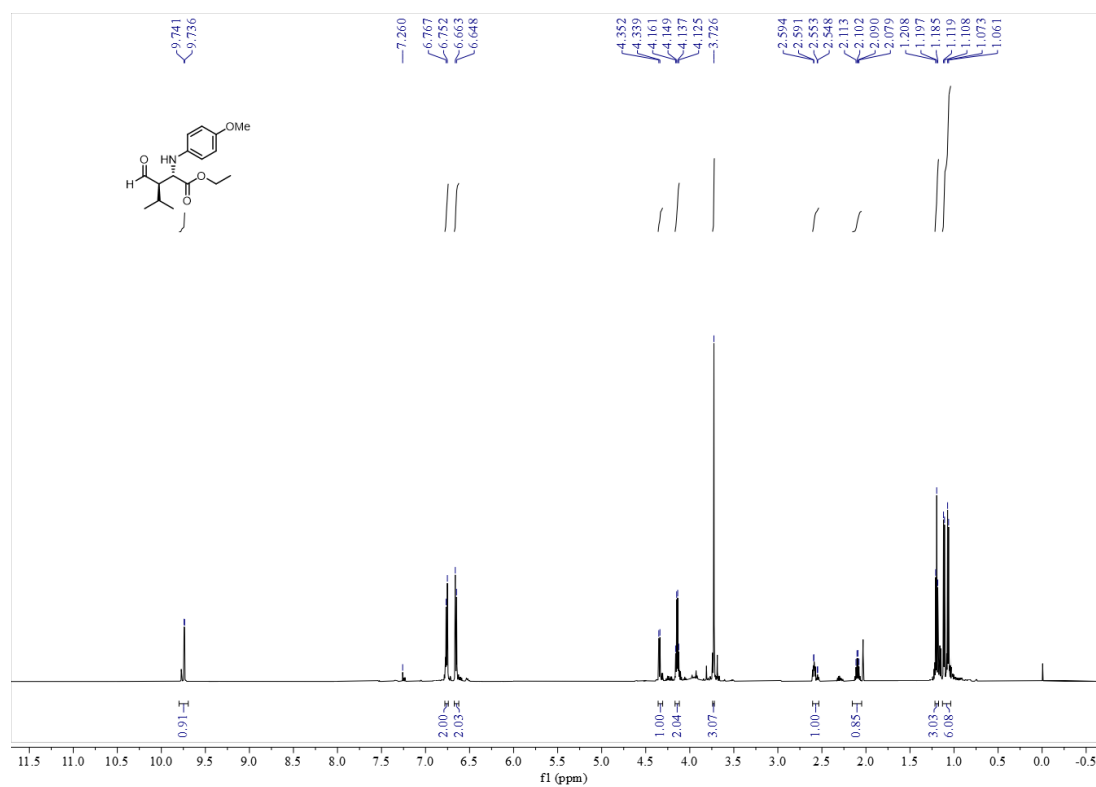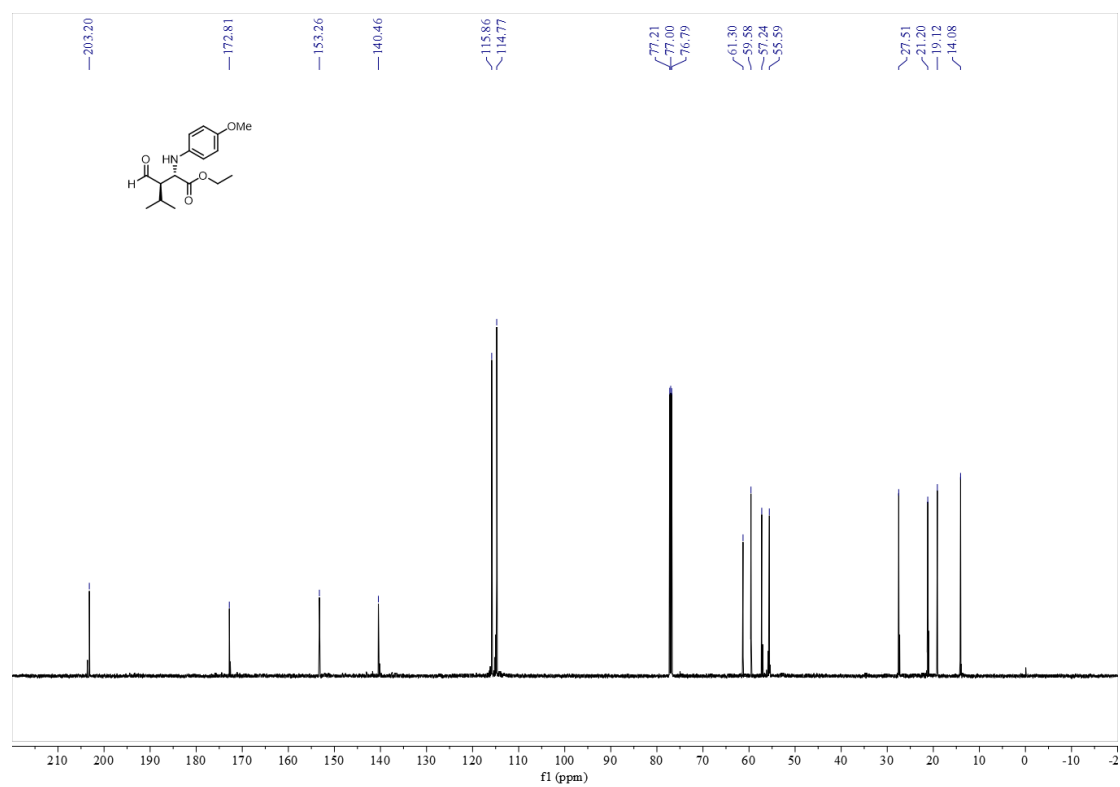

Ethyl (2S,3R)-3-formyl-2-((4-methoxyphenyl)amino)octanoate (**3en**)

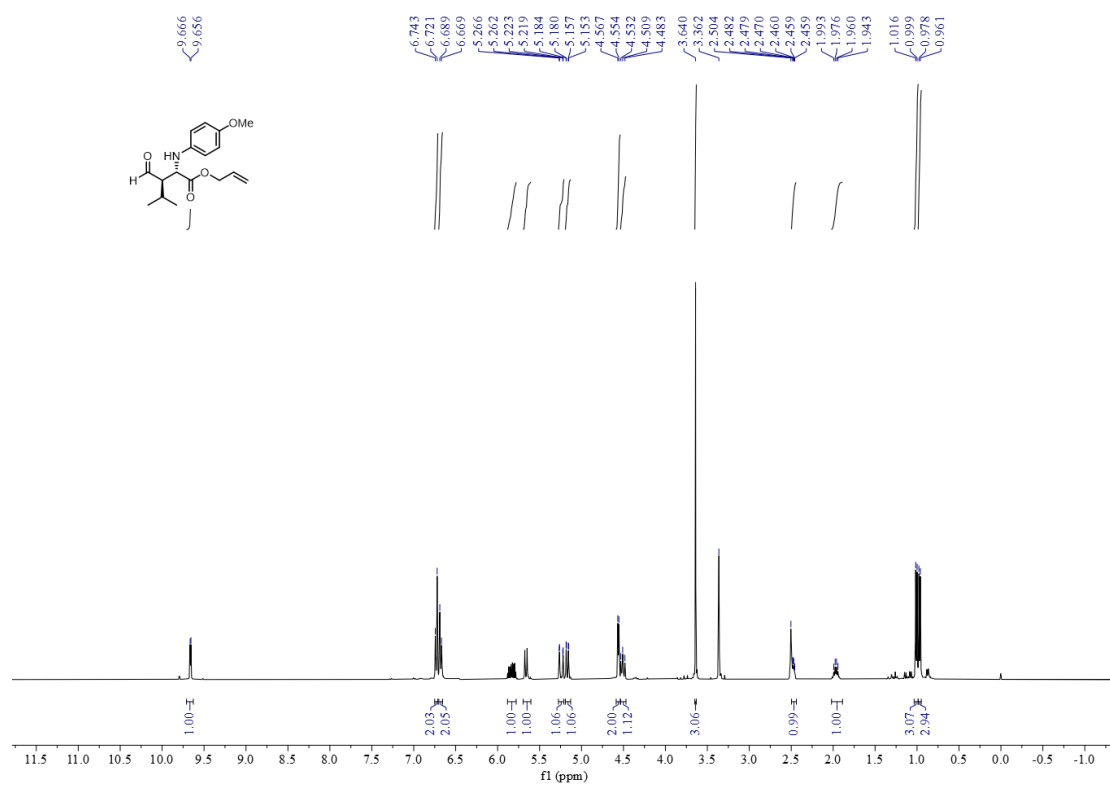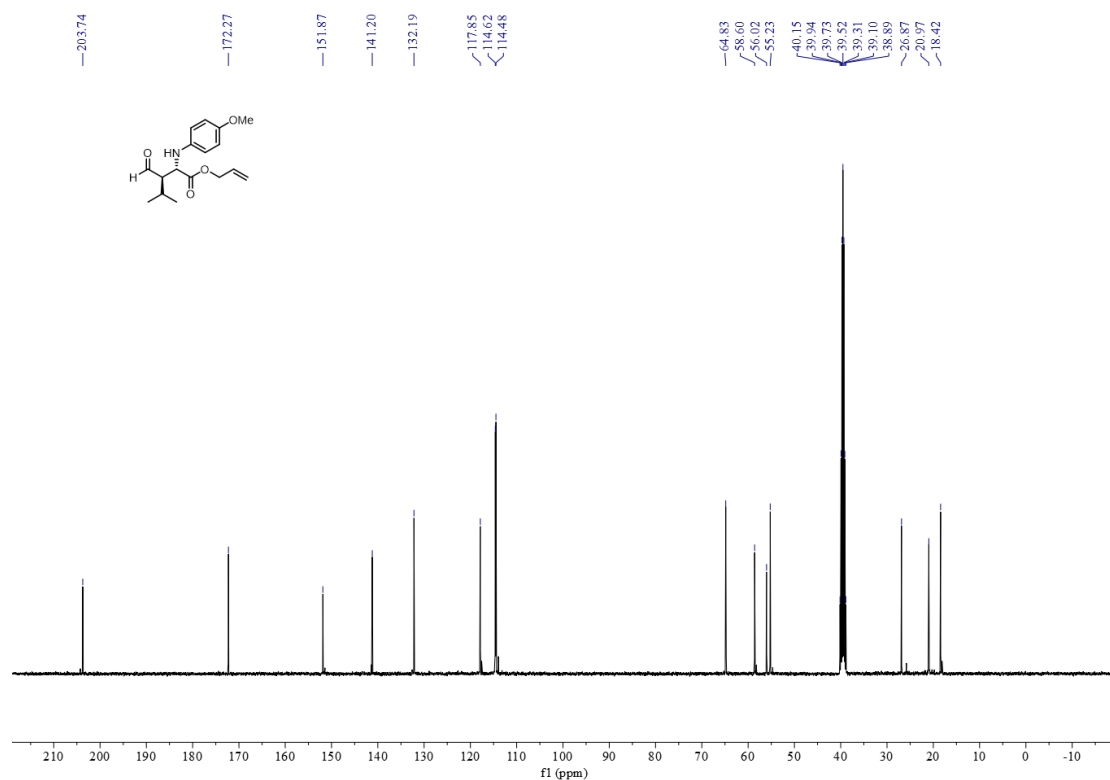

Benzyl (2S,3R)-3-formyl-2-((4-methoxyphenyl)amino)-4-methylpentanoate (**3gn**)

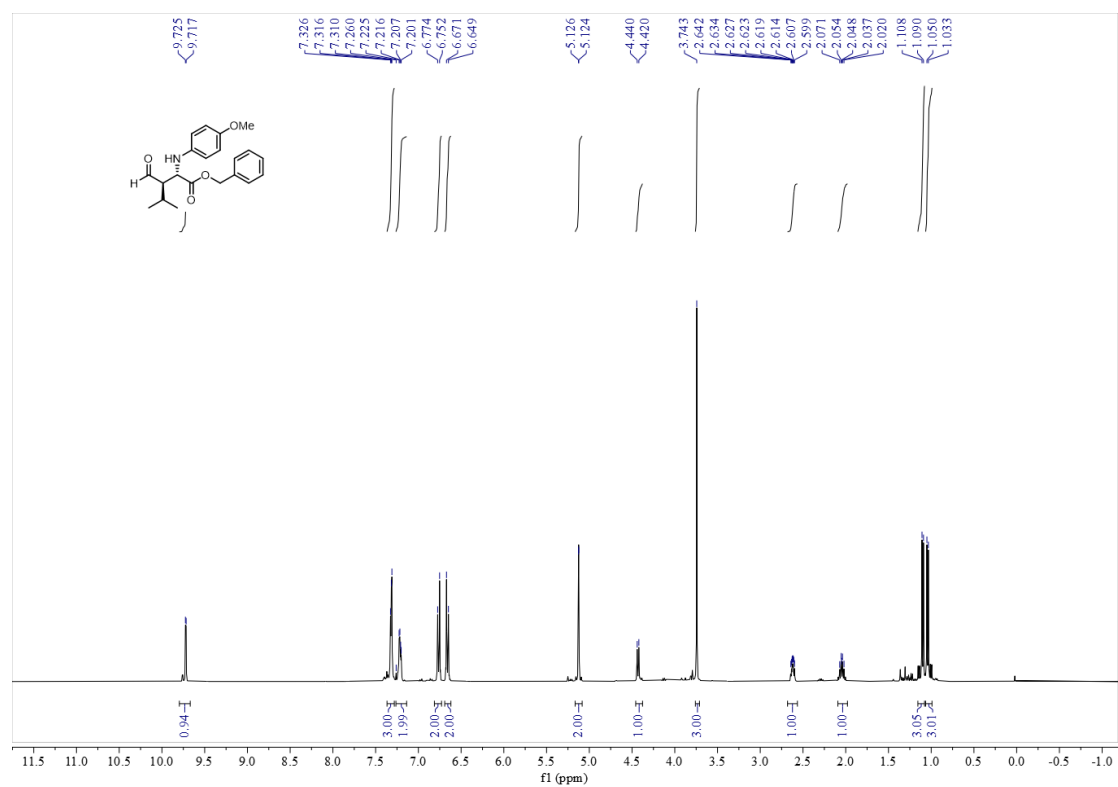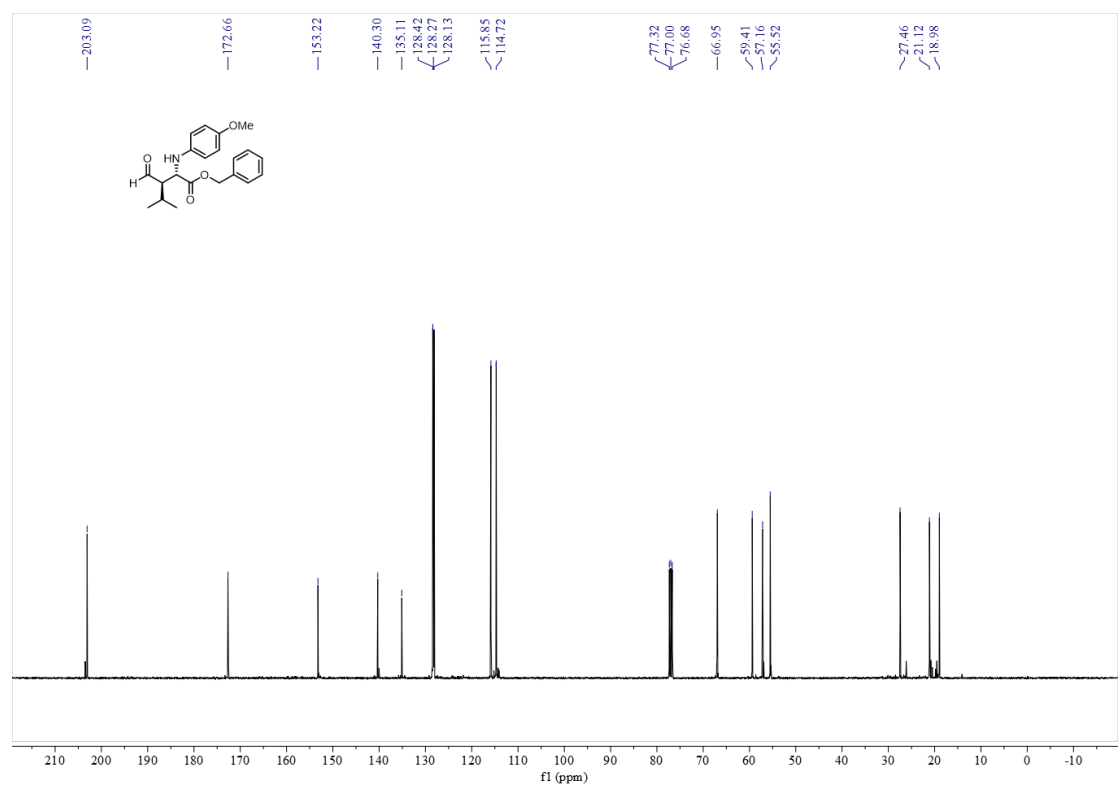

Ethyl (2S,3R)-3-formyl-2-((4-methoxyphenyl)amino)octanoate (**3ao**)

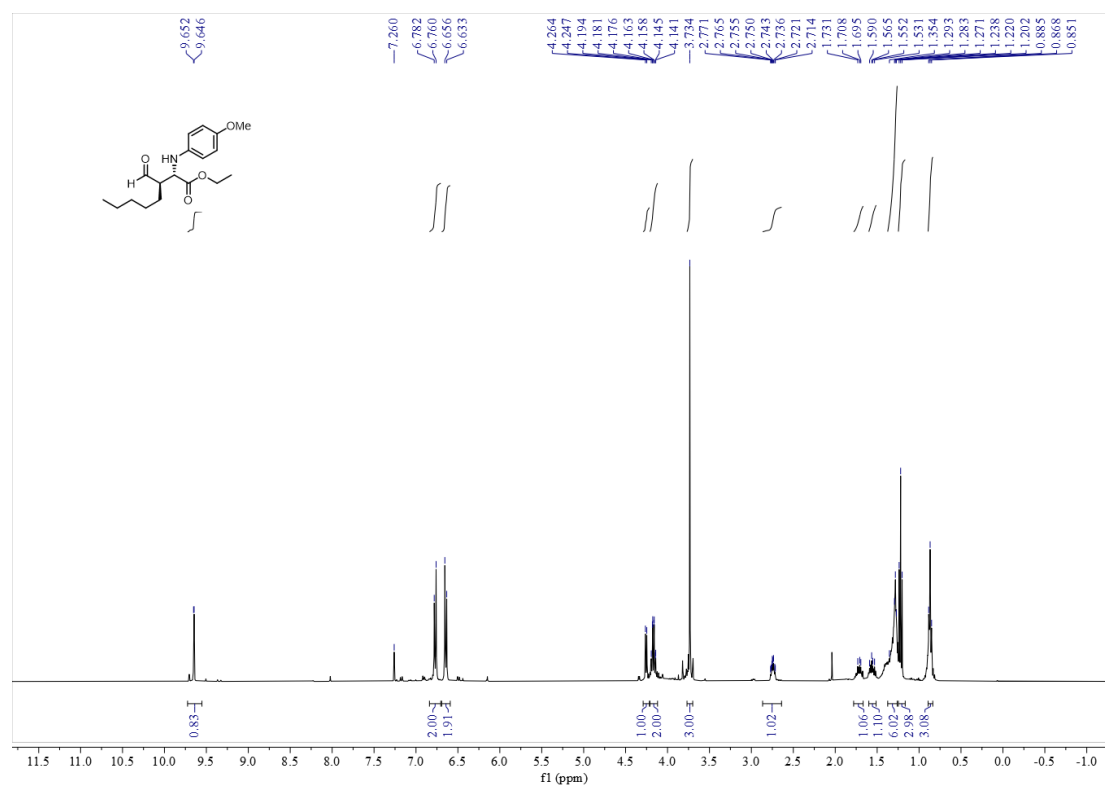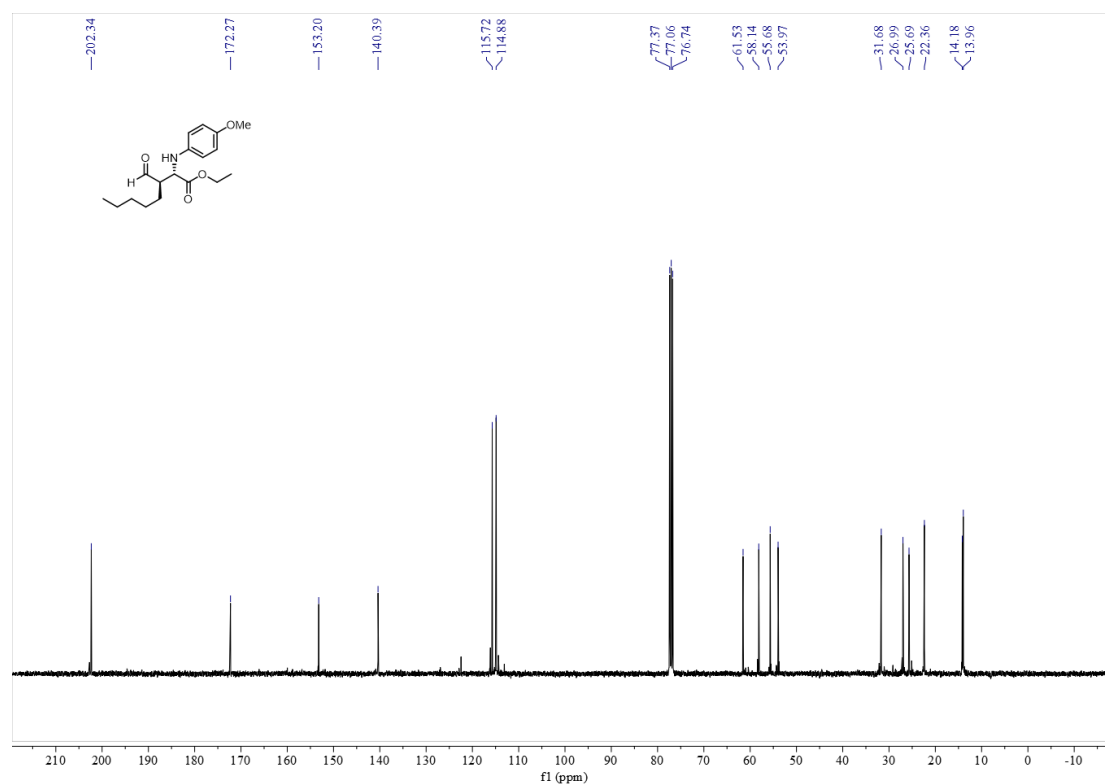

(S,Z)-N-(4-fluorophenethyl)-3-(hydroxymethylene)-2-((4-methoxyphenyl)amino)-4-methylpentanamide  
**(3pn)**

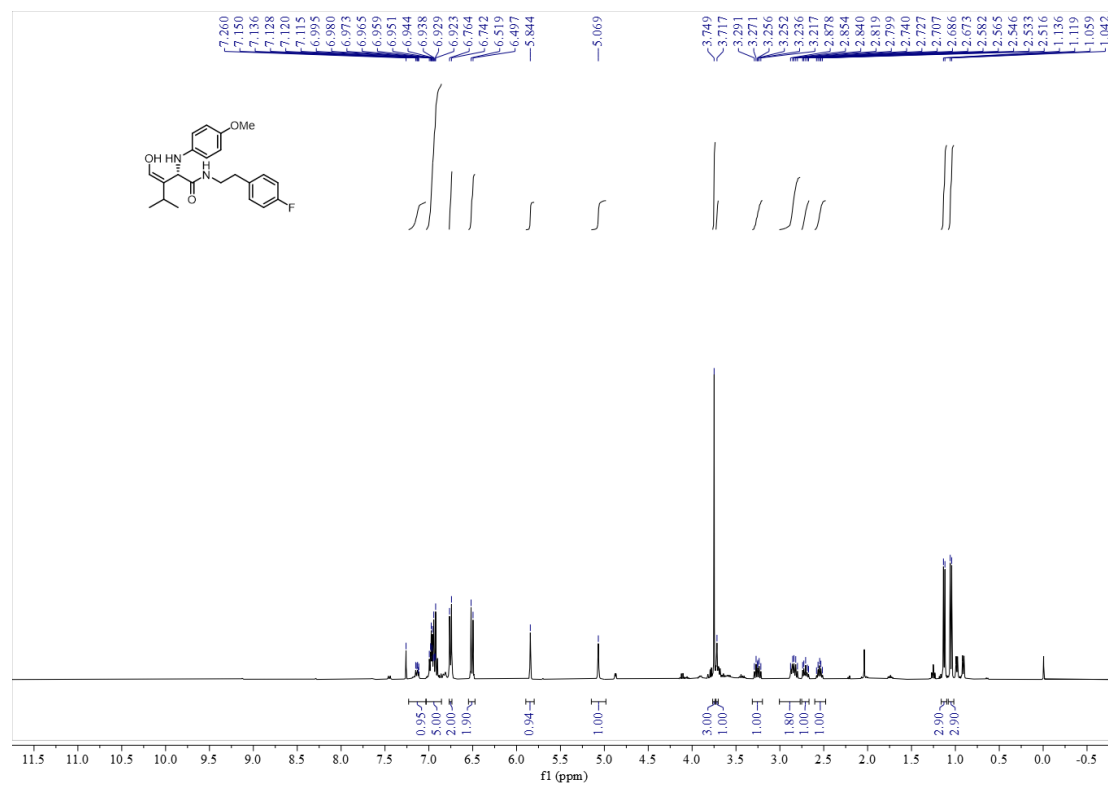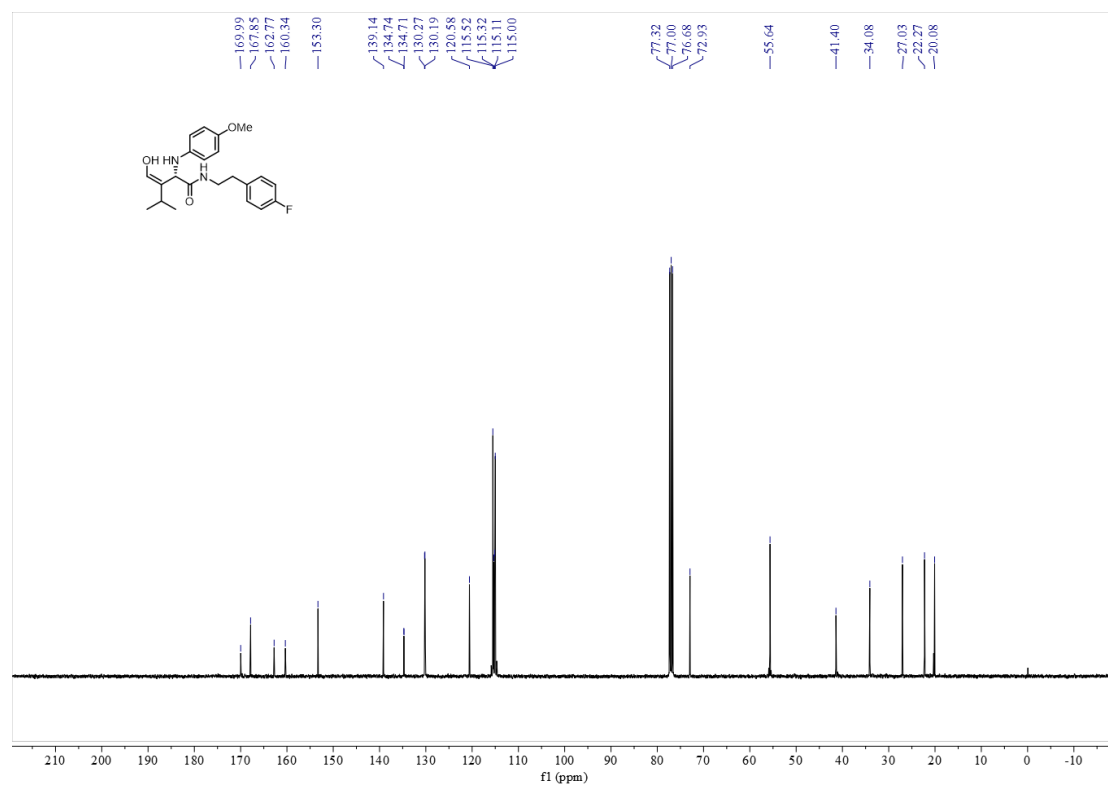



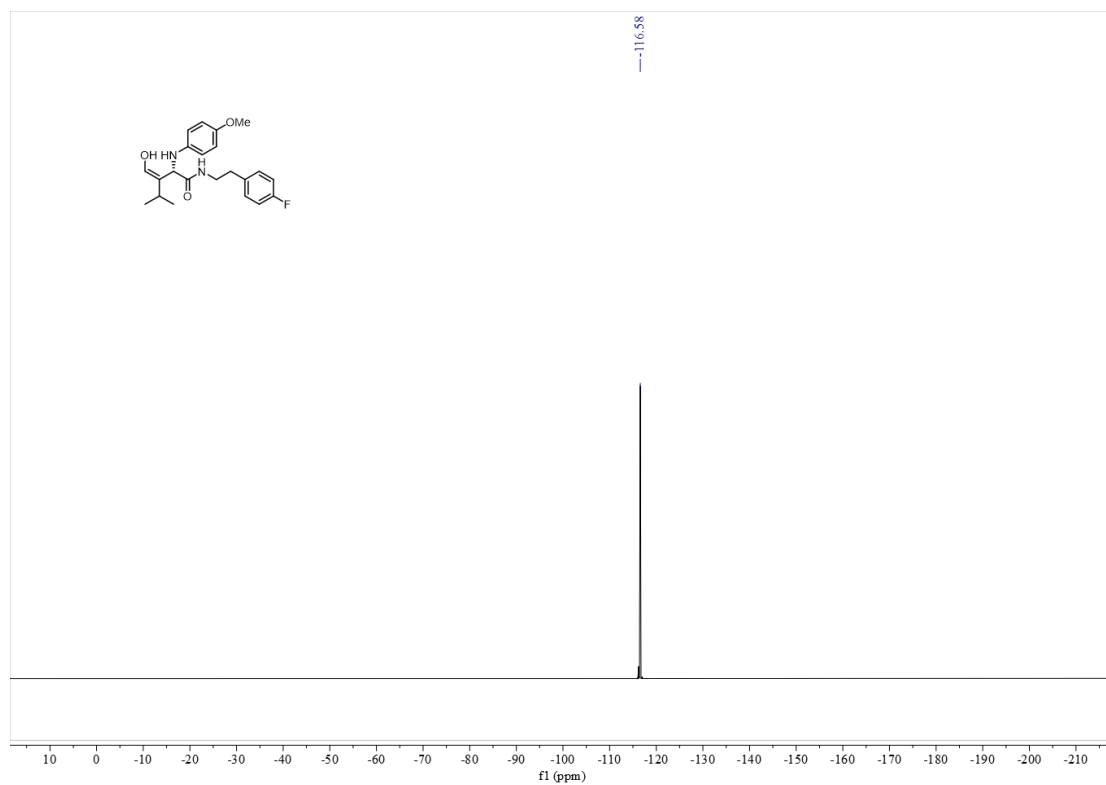

Ethyl N-(3,5-di-tert-butyl-4-hydroxybenzyl)-N-(4-methoxyphenyl)glycinate (**1a-BHT**)

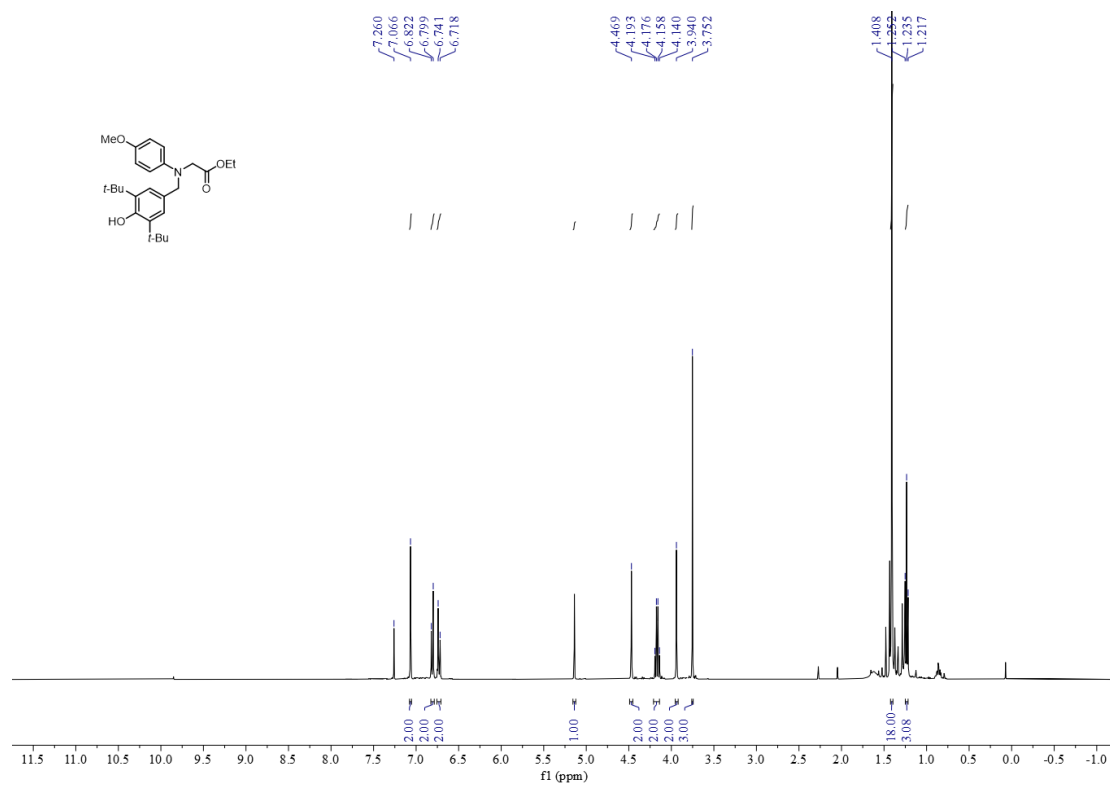

Ethyl (S)-2-cyclohexyl-2-((4-methoxyphenyl)amino)acetate (**4**)

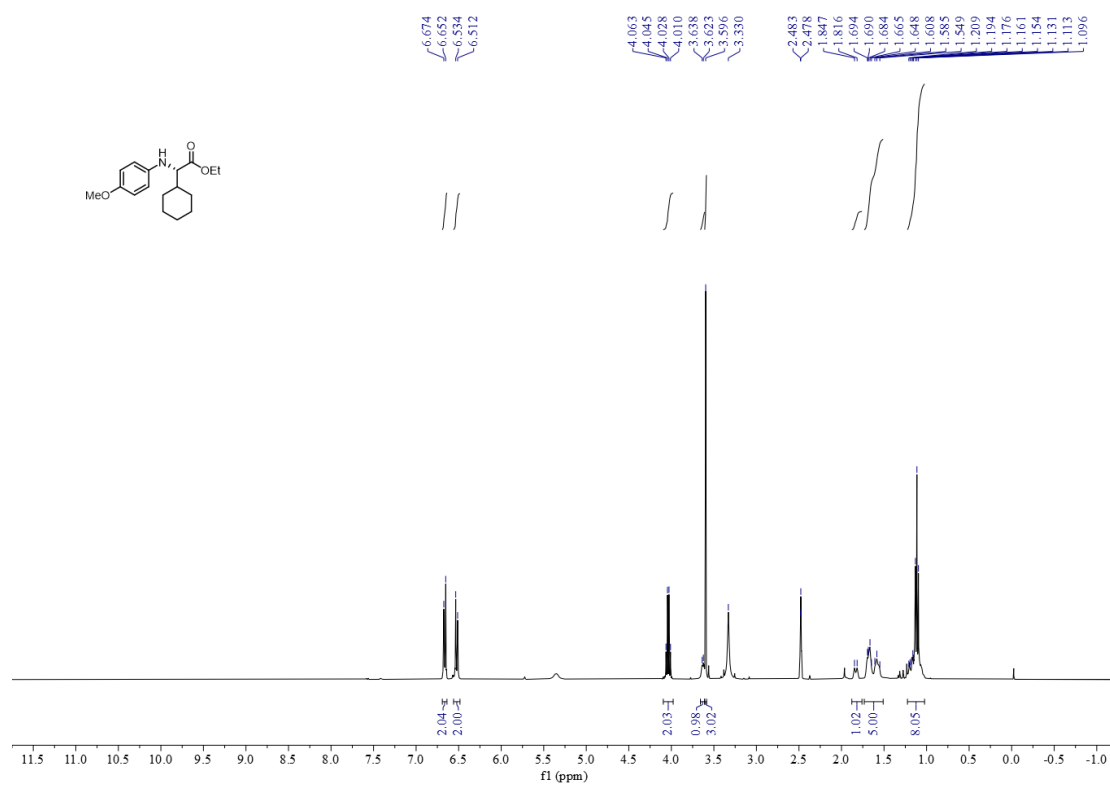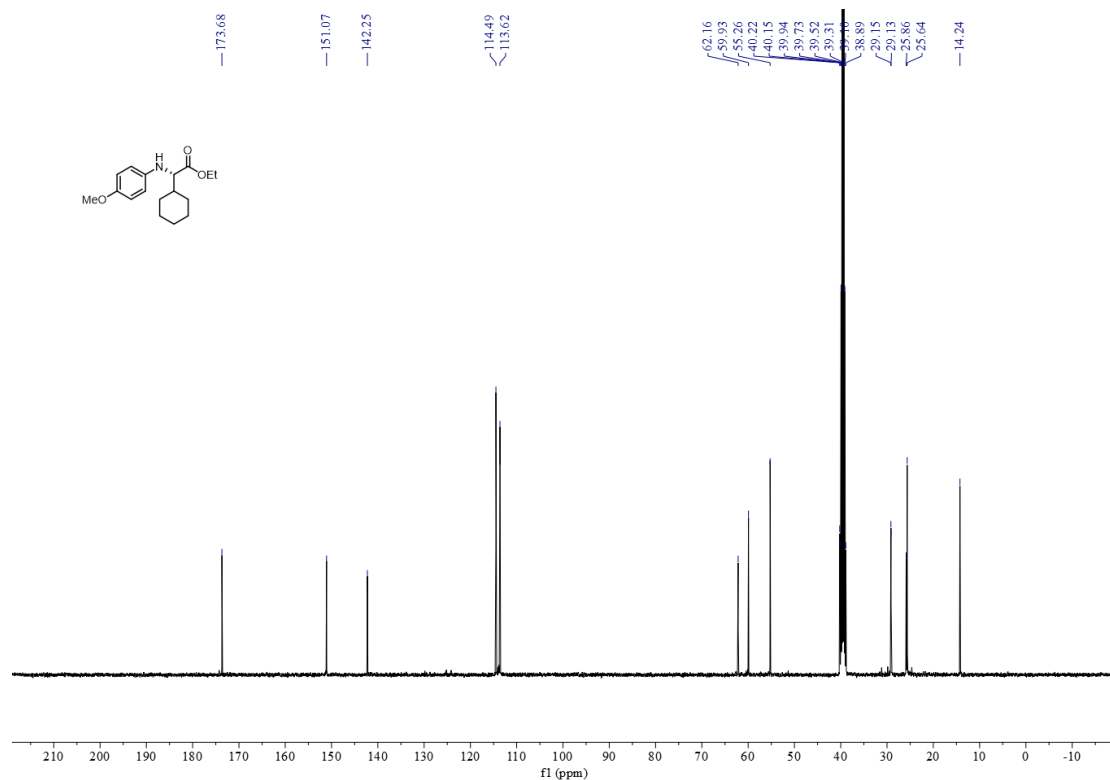

(S)-2-amino-2-cyclohexylacetic acid (**5**)

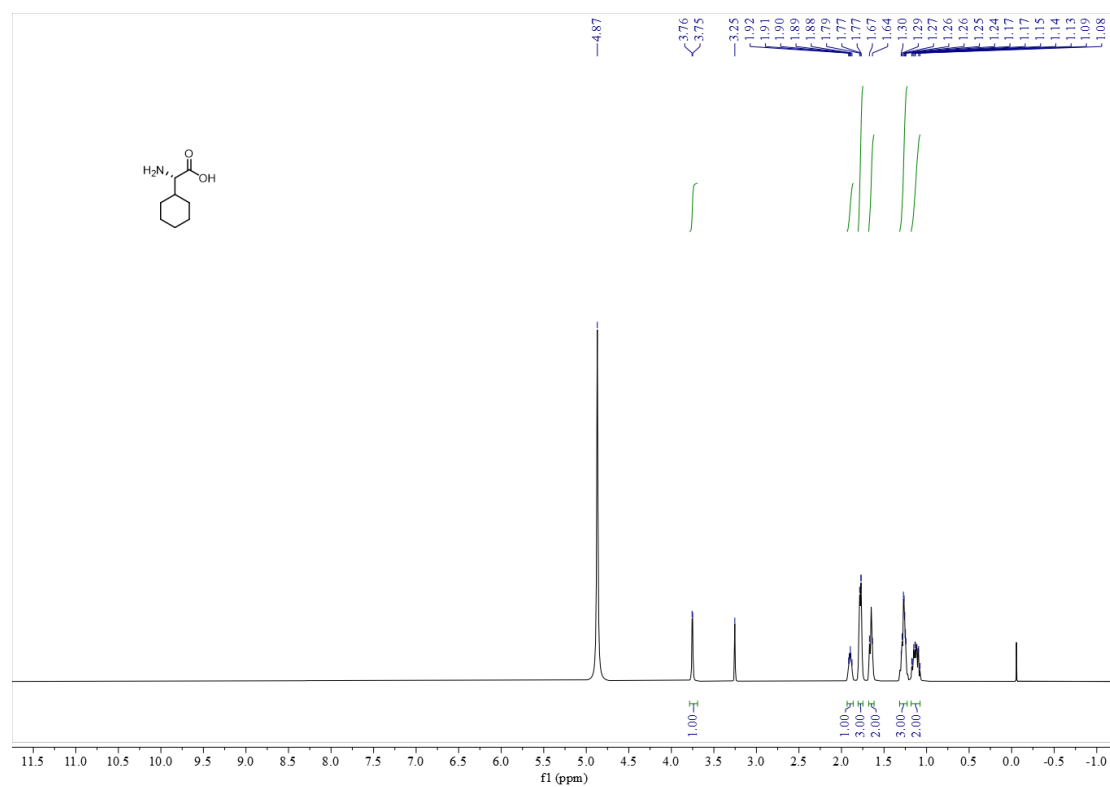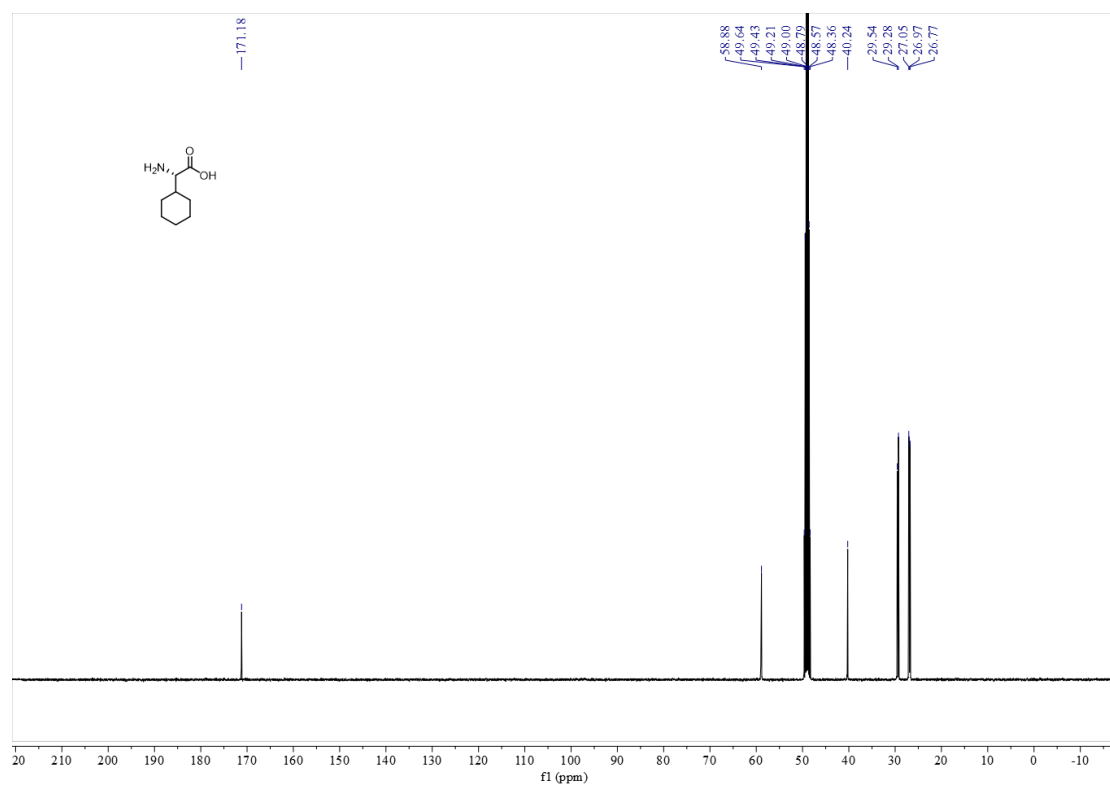

(2R,3S)-2-Isopropyl-3-((4-methoxyphenyl)amino)butane-1,4-diol (**6**)

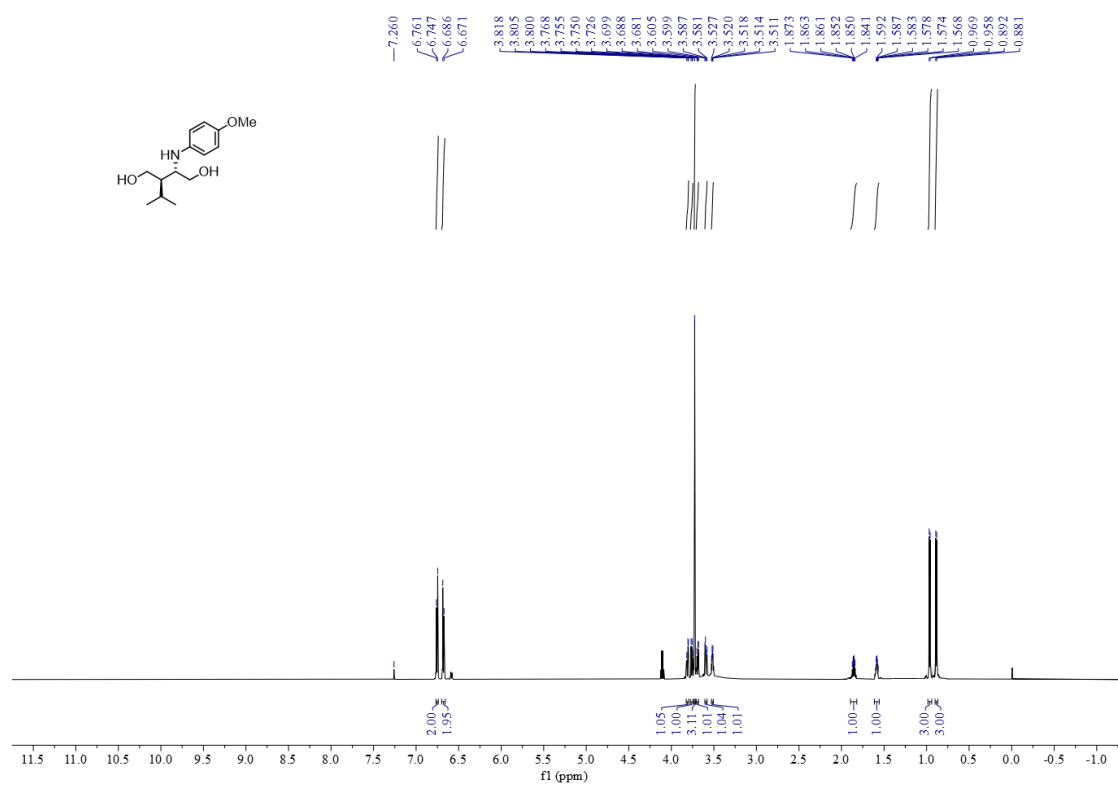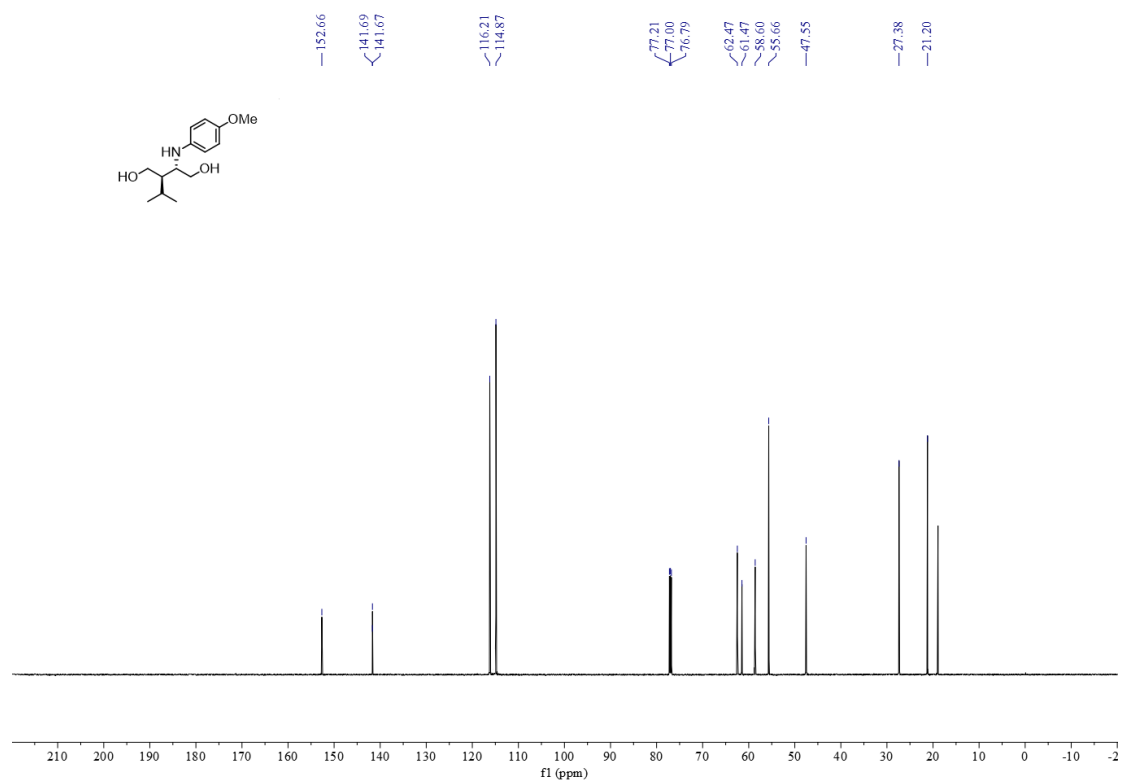

## 6. References

- [1] K.-Y. Xiang, P. Ying, T. Ying, W.-K. Su and J.-B. Yu, *Green Chem.*, 2023, **25**, 2853–2862.
- [2] P. Yan, R. Zeng, B. Bao, X.-M. Yang, L. Zhu, B. Pan, S.-L. Niu, X.-W. Qi, Y.-L. Li and Q. Ouyang, *Green Chem.*, 2022, **24**, 9263–9268.
- [3] O. V. Dolomanov, L. J. Bourhis, R. J. Gildea, J. A. K. Howard, H. Puschmann, *J. Appl. Cryst.*, 2009, **42**, 339–341.
- [4] G. M. Sheldrick, *Acta Cryst.*, 2015, **A71**, 3–8.
- [5] J. Xie, Z.-Z. Huang, *Angew. Chem.*, 2010, **49**, 10181–10185.
- [6] M. Debruyne, S. Borgmans, S. Radhakrishnan, E. Breynaert, H. Vrielinck, K. Leus, A. Laemont, J. De Vos, K. S. Rawat, S. Vanlommel, H. Rijckart, H. Salemi, J. Everaert, F. V. Bussche, D. Poelman, R. Morent, N. De Geyter, P. V. D. Voort, V. V. Speybroeck and C. V. Stevens, *ACS Appl. Mater. Interfaces*, 2023, **15**, 35092–35106.
- [7] X.-R. Yang, Z.-X. Xie, Y. Li and Y. Zhang, *Chem. Sci.*, 2020, **11**, 4741–4746.
- [8] Z.-H. Wang, P.-S. Gao, X. Wang, J.-Q. Gao, X.-T. Xu, Z. He, C. Ma and T.-S. Mei, *J. Am. Chem. Soc.*, 2021, **143**, 15599–15605.
- [9] P. Ying, T. Ying, H. Chen, K.-Y. Xiang, W.-K. Su, H.-J. Xie and J.-B. Yu, *Org. Chem. Front.*, 2024, **11**, 127–134.
- [10] W. Notz, S. Watanabe, N. S. Chowdari, G. Zhong, J. M. Betancort, F. Tanaka and C.F. Barbas III, *Adv. Synth. Catal.*, 2004, **346**, 1131–1140.
- [11] C. P. Decicco and P. Grover, *Synlett*, 1997, **5**, 529–530.
- [12] W. Notz, F. Tanaka, S. Watanabe, N. S. Chowdari, J. M. Turner, R. Thayumanavan and C. F. Barbas III, *J. Org. Chem.*, 2003, **68**, 9624–9634.
